# Supplementary material for: Nanosecond Pulsed Electric Field Only Transiently Affects the Cellular and Molecular Processes of Leydig Cells
Source: Int J Mol Sci. 2021 Oct 18;22(20):11236. doi: 10.3390/ijms222011236 (PMC8541366; doi:10.3390/ijms222011236)
Supplement: Supplementary file 1 [file ijms-22-11236-s001.zip › Kasprzycka at al. Supplementary_Tables.xlsx]

## Sheet: Table S1
Table S1
The values of the fold change ± SD of forward scatter (FSC, relative size) of nsPEF-exposed cells after the Annexin V-Alexa Fluor 488 and propidium iodide staining compared to the sham-exposed cells, recorded with flow cytometry. The fold change values are presented graphically in Figure 1e.
fold change of forward scatter ± SD
time (min)	AnV-/PI-	AnV+/PI-	AnV+/PI+	AnV-/PI+
0	1.26 ± 0.20	1.17 ± 0.08	1.04 ± 0.08	1.05 ± 0.15
30	1.36 ± 0.23	1.31 ± 0.05	1.05 ± 0.04	1.02 ± 0.06
60	1.32 ± 0.27	1.23 ± 0.05	1.03 ± 0.02	1.02 ± 0.05
240	1.24 ± 0.21	1.05 ± 0.04	1.02 ± 0.02	1.06 ± 0.05

## Sheet: Table S2
Table S2
Time dependent differentially expressed genes (p<0.05) in nsPEF-exposed cells (E0, E4, E24) and sham-treated cells (S0, S4, S24). Results of ANOVA sorted according to the value of p (Corr) (Time).
Gene_ID	p (Corr) (Time)	p (Time)	FC ([ctrl-4] vs [ctrl-0])	FC ([ctrl-24] vs [ctrl-0])	FC ([ctrl-24] vs [ctrl-4])	FC ([nsEP-4] vs [nsEP-0])	FC ([nsEP-24] vs [nsEP-0])	FC ([nsEP-24] vs [nsEP-4])	GeneSymbol	GeneName	Description	EntrezGeneID	RefSeqAccession	EnsemblID
A_51_P239654|15370	2.00108e-26	7.94743e-31	-12.1204	-33.6602	-2.77715	-12.6034	-36.3946	-2.88768	Nr4a1	nuclear receptor subfamily 4, group A, member 1	Mus musculus nuclear receptor subfamily 4, group A, member 1 (Nr4a1), mRNA [NM_010444]	15370	NM_010444	ENSMUST00000023779
A_55_P2158990|16476	2.37821e-25	1.88905e-29	-14.4143	-14.2494	1.01158	-14.6803	-13.905	1.05576	Jun	jun proto-oncogene	Mus musculus jun proto-oncogene (Jun), mRNA [NM_010591]	16476	NM_010591	ENSMUST00000107094
A_51_P101146|18788	1.26645e-24	1.50894e-28	22.8424	-1.19822	-27.3702	25.2633	-1.4963	-37.8015	Serpinb2	serine (or cysteine) peptidase inhibitor, clade B, member 2	Mus musculus serine (or cysteine) peptidase inhibitor, clade B, member 2 (Serpinb2), transcript variant 1, mRNA [NM_011111]	18788	NM_011111	ENSMUST00000064916
A_55_P2222860,A_52_P598912,A_55_P2505730|111173	1.32716e-24	2.10837e-28	4.16084	1.13877	-3.65382	4.67222	1.20618	-3.87355	Erc1	ELKS/RAB6-interacting/CAST family member 1	Mus musculus ELKS/RAB6-interacting/CAST family member 1 (Erc1), transcript variant 1, mRNA [NM_053204]///Mus musculus ELKS/RAB6-interacting/CAST family member 1 (Erc1), transcript variant 2, mRNA [NM_178085]	111173	NM_053204///NM_178085	ENSMUST00000185143///ENSMUST00000183741///ENSMUST00000032279
A_55_P2027737,A_55_P2027731,A_51_P339793|17082	1.0929e-22	2.17026e-26	34.8091	2.35239	-14.7973	41.7892	2.20564	-18.9465	Il1rl1	interleukin 1 receptor-like 1	Mus musculus interleukin 1 receptor-like 1 (Il1rl1), transcript variant 1, mRNA [NM_001025602]///Mus musculus interleukin 1 receptor-like 1 (Il1rl1), transcript variant 2, mRNA [NM_010743]	17082	NM_001025602///NM_010743	ENSMUST00000097772///ENSMUST00000173514
A_55_P2732773,A_66_P103507,A_55_P2792958|211770	1.18913e-22	2.83363e-26	-3.18597	-5.12955	-1.61004	-2.94561	-6.06195	-2.05796	Trib1	tribbles pseudokinase 1	tribbles pseudokinase 1 [Source:MGI Symbol;Acc:MGI:2443397] [ENSMUST00000118228]///BB543948 RIKEN full-length enriched, 0 day neonate eyeball Mus musculus cDNA clone E130213N17 3'. [BB543948]///Mus musculus tribbles pseudokinase 1 (Trib1), mRNA [NM_144549]	211770	NM_144549	ENSMUST00000118228///ENSMUST00000067543
A_55_P2731786,A_66_P139873,A_55_P2724794|83924	1.24206e-22	3.45306e-26	3.2842	1.63312	-2.011	3.3285	1.64169	-2.02748	Gpr137b	G protein-coupled receptor 137B	Mus musculus G protein-coupled receptor 137B (Gpr137b), mRNA [NM_031999]///PREDICTED: Mus musculus G protein-coupled receptor 137B (Gpr137b), transcript variant X2, mRNA [XM_006516805]	83924	NM_031999///XM_006516805	ENSMUST00000220628///ENSMUST00000222019
A_51_P373609,A_55_P2792658,A_52_P913|70120	1.33333e-22	4.23632e-26	2.39234	1.27005	-1.88367	2.37156	1.41052	-1.68134	Yars2	tyrosyl-tRNA synthetase 2 (mitochondrial)	Mus musculus tyrosyl-tRNA synthetase 2 (mitochondrial) (Yars2), transcript variant 1, mRNA [NM_198246]///tyrosyl-tRNA synthetase 2 (mitochondrial) [Source:MGI Symbol;Acc:MGI:1917370] [ENSMUST00000159962]	70120	NM_198246	ENSMUST00000162734///ENSMUST00000159683///ENSMUST00000159962
A_51_P518051,A_51_P347333|319520	2.93624e-22	1.10179e-25	2.71632	1.36246	-1.99369	2.94522	1.4335	-2.05457	Dusp4	dual specificity phosphatase 4	Mus musculus dual specificity phosphatase 4 (Dusp4), mRNA [NM_176933]///Q8I865_SPOFR (Q8I865) Ribosomal protein S2, partial (7%) [TC1608176]	319520	NM_176933	ENSMUST00000033930
A_52_P300730,A_55_P2743046,A_55_P2717912|15364	2.93624e-22	1.25608e-25	5.67678	1.96901	-2.88306	6.34002	2.20951	-2.86943	Hmga2	high mobility group AT-hook 2	Mus musculus high mobility group AT-hook 2 (Hmga2), transcript variant 2, mRNA [NM_001347170]///high mobility group AT-hook 2 [Source:MGI Symbol;Acc:MGI:101761] [ENSMUST00000159310]	15364	NM_001347170	ENSMUST00000159699///ENSMUST00000159310
A_52_P681310|18793	2.93624e-22	1.28276e-25	8.8758	1.48746	-5.96708	9.3557	1.58875	-5.88871	Plaur	plasminogen activator, urokinase receptor	Mus musculus plasminogen activator, urokinase receptor (Plaur), mRNA [NM_011113]	18793	NM_011113	ENSMUST00000206514
A_55_P2119257,A_52_P207173|18787	3.07779e-22	1.46684e-25	6.68043	1.3842	-4.8262	7.72226	1.17887	-6.55059	Serpine1	serine (or cysteine) peptidase inhibitor, clade E, member 1	Mus musculus serine (or cysteine) peptidase inhibitor, clade E, member 1 (Serpine1), mRNA [NM_008871]///serine (or cysteine) peptidase inhibitor, clade E, member 1 [Source:MGI Symbol;Acc:MGI:97608] [ENSMUST00000199832]	18787	NM_008871	ENSMUST00000077523///ENSMUST00000199832
A_52_P162695,A_51_P237097|52118	3.18356e-22	1.67694e-25	4.43757	1.27894	-3.46973	4.97095	1.16099	-4.28164	Pvr	poliovirus receptor	Mus musculus poliovirus receptor (Pvr), mRNA [NM_027514]	52118	NM_027514	ENSMUST00000043517///ENSMUST00000159413
A_55_P2125491|22163	3.18356e-22	1.77012e-25	9.90658	1.65364	-5.99078	11.2005	1.90481	-5.88013	Tnfrsf4	tumor necrosis factor receptor superfamily, member 4	Mus musculus tumor necrosis factor receptor superfamily, member 4 (Tnfrsf4), mRNA [NM_011659]	22163	NM_011659	ENSMUST00000143576
A_55_P2744102,A_55_P2113051|14282	3.49165e-22	2.0801e-25	-59.2791	-94.4099	-1.59263	-47.8404	-81.3784	-1.70104	Fosb	FBJ osteosarcoma oncogene B	Mus musculus FBJ osteosarcoma oncogene B (Fosb), transcript variant 1, mRNA [NM_008036]	14282	NM_008036	ENSMUST00000208446///ENSMUST00000208326
A_65_P14641,A_55_P2738142,A_51_P483329|231452	3.62409e-22	2.30293e-25	2.38859	1.22754	-1.94583	2.41757	1.18601	-2.0384	Sdad1	SDA1 domain containing 1	Mus musculus SDA1 domain containing 1 (Sdad1), mRNA [NM_172713]///SDA1 domain containing 1 [Source:MGI Symbol;Acc:MGI:2140779] [ENSMUST00000202604]	231452	NM_172713	ENSMUST00000201143///ENSMUST00000202604///ENSMUST00000031364
A_52_P466615,A_51_P273433|19092	3.63225e-22	2.45237e-25	5.70958	1.33632	-4.27263	5.91352	1.47124	-4.01942	Prkg2	protein kinase, cGMP-dependent, type II	Mus musculus protein kinase, cGMP-dependent, type II (Prkg2), mRNA [NM_008926]	19092	NM_008926	ENSMUST00000031277
A_51_P303791,A_51_P239750|16323	3.8148e-22	2.72713e-25	12.8676	1.39285	-9.23831	13.5263	1.31721	-10.2688	Inhba	inhibin beta-A	Mus musculus inhibin beta-A (Inhba), mRNA [NM_008380]	16323	NM_008380	ENSMUST00000042603///ENSMUST00000164993
A_51_P444447|12609	4.07948e-22	3.07836e-25	-6.13729	-1.30378	4.70731	-7.28207	-1.63716	4.44799	Cebpd	CCAAT/enhancer binding protein (C/EBP), delta	Mus musculus CCAAT/enhancer binding protein (C/EBP), delta (Cebpd), mRNA [NM_007679]	12609	NM_007679	ENSMUST00000096232
A_55_P2912261,A_55_P2166501,A_55_P2166488|12505	8.48809e-22	6.7422e-25	7.24462	1.5378	-4.71102	7.95725	1.61064	-4.94043	Cd44	CD44 antigen	Mus musculus CD44 antigen (Cd44), transcript variant 1, mRNA [NM_009851]	12505	NM_009851	ENSMUST00000099673///ENSMUST00000111191///ENSMUST00000111198
A_51_P202964,A_52_P207614,A_55_P2742555|13000	9.27679e-22	7.7371e-25	1.98043	1.05849	-1.871	1.97878	1.10831	-1.78539	Csnk2a2	casein kinase 2, alpha prime polypeptide	Mus musculus casein kinase 2, alpha prime polypeptide (Csnk2a2), mRNA [NM_009974]///casein kinase 2, alpha prime polypeptide [Source:MGI Symbol;Acc:MGI:88547] [ENSMUST00000212214]	13000	NM_009974	ENSMUST00000212214///ENSMUST00000212952
A_52_P203440|57425	1.06452e-21	9.3012e-25	9.79484	3.03119	-3.23136	12.6767	3.91451	-3.23838	U90926	cDNA sequence U90926	Mus musculus cDNA sequence U90926 (U90926), long non-coding RNA [NR_033483]	57425	NR_033483	ENSMUST00000031356
A_30_P01032405	1.25564e-21	1.14698e-24	-5.82104	-1.47928	3.93503	-6.28403	-1.86113	3.37647			lincRNA:chr1:138592780-138622719 forward strand
A_55_P2171116,A_51_P101929|16854	1.49451e-21	1.44914e-24	5.81411	1.9556	-2.97305	6.96247	2.21896	-3.13772	Lgals3	lectin, galactose binding, soluble 3	Mus musculus lectin, galactose binding, soluble 3 (Lgals3), transcript variant 1, mRNA [NM_001145953]///Mus musculus lectin, galactose binding, soluble 3 (Lgals3), transcript variant 2, mRNA [NM_010705]	16854	NM_001145953///NM_010705	ENSMUST00000150290///ENSMUST00000146468
A_52_P428721,A_55_P2499408,A_51_P332952,A_65_P18258|107817	1.49451e-21	1.58339e-24	3.11282	1.23473	-2.52106	3.18416	1.28065	-2.48637	Jmjd6	jumonji domain containing 6	jumonji domain containing 6 [Source:MGI Symbol;Acc:MGI:1858910] [ENSMUST00000130120]///Mus musculus jumonji domain containing 6 (Jmjd6), mRNA [NM_033398]///jumonji domain containing 6 [Source:MGI Symbol;Acc:MGI:1858910] [ENSMUST00000141735]	107817	NM_033398	ENSMUST00000130120///ENSMUST00000141735///ENSMUST00000047616
A_51_P227165|66952	1.49451e-21	1.6026e-24	3.25147	-1.21134	-3.93864	3.56417	-1.16899	-4.16649	2310030G06Rik	RIKEN cDNA 2310030G06 gene	Mus musculus RIKEN cDNA 2310030G06 gene (2310030G06Rik), mRNA [NM_025865]	66952	NM_025865	ENSMUST00000034564
A_55_P2485019|18582	1.49451e-21	1.57948e-24	-5.12808	-1.18368	4.33232	-5.17898	-1.19744	4.32505	Pde6d	phosphodiesterase 6D, cGMP-specific, rod, delta	Mus musculus phosphodiesterase 6D, cGMP-specific, rod, delta (Pde6d), mRNA [NM_008801]	18582	NM_008801	ENSMUST00000143674
A_55_P2908530|19252	1.71365e-21	1.90564e-24	-16.0879	-12.0486	1.33525	-13.0333	-16.0214	-1.22927	Dusp1	dual specificity phosphatase 1	Mus musculus dual specificity phosphatase 1 (Dusp1), mRNA [NM_013642]	19252	NM_013642	ENSMUST00000126178
A_51_P213544|16600	1.98752e-21	2.28913e-24	-2.80122	-7.83325	-2.79637	-2.56424	-8.02436	-3.12933	Klf4	Kruppel-like factor 4 (gut)	Mus musculus Kruppel-like factor 4 (gut) (Klf4), mRNA [NM_010637]	16600	NM_010637	ENSMUST00000107619
A_51_P253019|407830	2.87727e-21	3.42818e-24	5.48228	1.2125	-4.52147	5.52688	1.27525	-4.33395	BC010981	cDNA sequence BC010981	Q5JRG1_HUMAN (Q5JRG1) Nucleoporin like 1 (Fragment), partial (25%) [TC1659387]	407830
A_51_P142515|71914	2.93243e-21	3.61037e-24	5.01102	1.70755	-2.93462	5.48576	1.90244	-2.88353	Antxr2	anthrax toxin receptor 2	Mus musculus anthrax toxin receptor 2 (Antxr2), mRNA [NM_133738]	71914	NM_133738	ENSMUST00000031281
A_55_P2046348,A_55_P2803946|319622	3.21554e-21	4.14804e-24	5.90332	1.53101	-3.85583	6.15334	1.54421	-3.98479	Itpripl2	inositol 1,4,5-triphosphate receptor interacting protein-like 2	Mus musculus inositol 1,4,5-triphosphate receptor interacting protein-like 2 (Itpripl2), mRNA [NM_001033380]	319622	NM_001033380	ENSMUST00000178344
A_55_P2799430|13642	3.21554e-21	4.21433e-24	4.13808	1.38865	-2.97994	4.94789	1.57128	-3.14895	Efnb2	ephrin B2	Mus musculus ephrin B2 (Efnb2), mRNA [NM_010111]	13642	NM_010111	ENSMUST00000001319
A_55_P1955172,A_55_P2860117,A_52_P188261,A_55_P1978830,A_55_P2719445|108058	4.59139e-21	6.38224e-24	3.89619	1.25373	-3.10768	3.81882	1.20275	-3.17507	Camk2d	calcium/calmodulin-dependent protein kinase II, delta	calcium/calmodulin-dependent protein kinase II, delta [Source:MGI Symbol;Acc:MGI:1341265] [ENSMUST00000169051]///Mus musculus calcium/calmodulin-dependent protein kinase II, delta (Camk2d), transcript variant 8, mRNA [NM_001346635]///Mus musculus calcium/calmodulin-dependent protein kinase II, delta (Camk2d), transcript variant 1, mRNA [NM_001025439]///calcium/calmodulin-dependent protein kinase …	108058	NM_001346635///NM_001025439	ENSMUST00000169051///ENSMUST00000200171///ENSMUST00000066452///ENSMUST00000106399///ENSMUST00000134987
A_55_P1954156,A_55_P2788388|72515	4.59139e-21	6.20534e-24	2.70065	1.23647	-2.18416	2.8535	1.25226	-2.27867	Wdr43	WD repeat domain 43	Mus musculus WD repeat domain 43 (Wdr43), mRNA [NM_175639]	72515	NM_175639	ENSMUST00000047086
A_51_P467233,A_55_P2140726|69870	4.70041e-21	6.82454e-24	-4.02684	-1.25696	3.20365	-4.09189	-1.41981	2.882	Polr3gl	polymerase (RNA) III (DNA directed) polypeptide G like	Mus musculus polymerase (RNA) III (DNA directed) polypeptide G like (Polr3gl), transcript variant 1, mRNA [NM_027241]	69870	NM_027241	ENSMUST00000091924///ENSMUST00000145001
A_52_P494622,A_66_P118213|18227	4.70041e-21	6.90716e-24	-4.26798	-5.53379	-1.29658	-5.13091	-7.34404	-1.43133	Nr4a2	nuclear receptor subfamily 4, group A, member 2	Mus musculus nuclear receptor subfamily 4, group A, member 2 (Nr4a2), transcript variant 1, mRNA [NM_013613]	18227	NM_013613	ENSMUST00000112627
A_55_P2136880|17872	4.91618e-21	7.41947e-24	-5.07254	-5.01312	1.01185	-4.60363	-4.63855	-1.00759	Ppp1r15a	protein phosphatase 1, regulatory (inhibitor) subunit 15A	Mus musculus protein phosphatase 1, regulatory (inhibitor) subunit 15A (Ppp1r15a), mRNA [NM_008654]	17872	NM_008654	ENSMUST00000167273
A_52_P31543,A_55_P2909355|12227	5.87967e-21	9.10708e-24	-21.4852	-8.92361	2.40768	-18.5059	-10.8094	1.71202	Btg2	B cell translocation gene 2, anti-proliferative	Mus musculus B cell translocation gene 2, anti-proliferative (Btg2), mRNA [NM_007570]	12227	NM_007570	ENSMUST00000020692
A_55_P2737802,A_66_P108019,A_51_P362531|217995	7.34949e-21	1.20424e-23	2.7393	1.29146	-2.12108	2.78292	1.46118	-1.90457	Heatr1	HEAT repeat containing 1	Mus musculus HEAT repeat containing 1 (Heatr1), mRNA [NM_144835]	217995	NM_144835	ENSMUST00000221046///ENSMUST00000059270
A_52_P589268,A_52_P487024|226517	7.34949e-21	1.22594e-23	2.79561	1.46044	-1.91423	2.77738	1.48551	-1.86965	Smg7	Smg-7 homolog, nonsense mediated mRNA decay factor (C. elegans)	Mus musculus Smg-7 homolog, nonsense mediated mRNA decay factor (C. elegans) (Smg7), transcript variant 3, mRNA [NM_001005507]	226517	NM_001005507	ENSMUST00000111836///ENSMUST00000043560
A_52_P612636,A_55_P2280237,A_55_P2728058,A_51_P125602|242109	7.34949e-21	1.22269e-23	3.21722	1.0626	-3.02767	3.1873	1.2465	-2.55699	Zfp697	zinc finger protein 697	zinc finger protein 697 [Source:MGI Symbol;Acc:MGI:2139736] [ENSMUST00000196194]///Mus musculus zinc finger protein 697 (Zfp697), mRNA [NM_172863]///zinc finger protein 697 [Source:MGI Symbol;Acc:MGI:2139736] [ENSMUST00000196741]	242109	NM_172863	ENSMUST00000196194///ENSMUST00000178372///ENSMUST00000196741
A_30_P01030369	1.39109e-20	2.37566e-23	48.802	1.00866	-48.3829	59.7493	1.52846	-39.0911			lincRNA:chr18:70400082-70404236 reverse strand
A_55_P2732813,A_55_P2126950,A_55_P2126951|68910	1.47451e-20	2.6126e-23	-4.02273	-1.23413	3.25957	-4.16417	-1.36277	3.05567	Zfp467	zinc finger protein 467	Mus musculus zinc finger protein 467 (Zfp467), transcript variant 1, mRNA [NM_020589]///Mus musculus zinc finger protein 467 (Zfp467), transcript variant 4, mRNA [NM_001085417]	68910	NM_020589///NM_001085417	ENSMUST00000114558///ENSMUST00000114564///ENSMUST00000141449
A_66_P123218|65112	1.47451e-20	2.63525e-23	17.4183	1.15759	-15.0471	17.8728	1.38531	-12.9016	Pmepa1	prostate transmembrane protein, androgen induced 1	Mus musculus prostate transmembrane protein, androgen induced 1 (Pmepa1), mRNA [NM_022995]	65112	NM_022995	ENSMUST00000036248
A_51_P173961|68559	1.51927e-20	2.78885e-23	2.48538	-1.14173	-2.83764	2.52692	1.00503	-2.51426	Pdrg1	p53 and DNA damage regulated 1	Mus musculus p53 and DNA damage regulated 1 (Pdrg1), mRNA [NM_178939]	68559	NM_178939	ENSMUST00000150545
A_51_P433091|19291	1.51927e-20	2.8648e-23	2.4572	1.25809	-1.95313	2.52927	1.29917	-1.94683	Purb	purine rich element binding protein B	Mus musculus purine rich element binding protein B (Purb), mRNA [NM_011221]	19291	NM_011221	ENSMUST00000179343
A_51_P438165|239027	1.51927e-20	2.89626e-23	7.78104	1.87106	-4.15862	8.26128	2.07019	-3.99059	Arhgap22	Rho GTPase activating protein 22	Mus musculus Rho GTPase activating protein 22 (Arhgap22), mRNA [NM_153800]	239027	NM_153800	ENSMUST00000137590
A_55_P2797255|22695	1.52025e-20	3.05941e-23	-22.6599	-16.3743	1.38387	-22.4694	-18.8956	1.18914	Zfp36	zinc finger protein 36	Mus musculus zinc finger protein 36 (Zfp36), mRNA [NM_011756]	22695	NM_011756	ENSMUST00000209061
A_55_P2150058,A_66_P115855|68040	1.52025e-20	2.97906e-23	4.51211	-1.021	-4.60688	4.64594	1.16921	-3.97357	Zfp593	zinc finger protein 593	Mus musculus zinc finger protein 593 (Zfp593), mRNA [NM_024215]	68040	NM_024215	ENSMUST00000129183
A_51_P481325,A_52_P554555|15936	1.52025e-20	3.07926e-23	-4.85998	-6.33966	-1.30446	-4.48106	-6.66684	-1.48778	Ier2	immediate early response 2	Mus musculus immediate early response 2 (Ier2), mRNA [NM_010499]///IER2_MOUSE (P17950) Immediate early response gene 2 protein (T-lymphocyte-activated protein) (Cycloheximide-induced gene protein) (CHX1) (Growth factor-inducible immediate early protein) (Proline-rich-induced protein 92) (Pip92), complete [TC1574473]	15936	NM_010499	ENSMUST00000060427
A_55_P2056493,A_51_P224013,A_55_P2056501,A_55_P2056496,A_55_P2716436|21877	1.63235e-20	3.38179e-23	-2.8849	1.02895	2.96841	-2.86209	1.15656	3.31017	Tk1	thymidine kinase 1	thymidine kinase 1 [Source:MGI Symbol;Acc:MGI:98763] [ENSMUST00000153298]///Mus musculus thymidine kinase 1 (Tk1), transcript variant 1, mRNA [NM_009387]///thymidine kinase 1 [Source:MGI Symbol;Acc:MGI:98763] [ENSMUST00000129852]///thymidine kinase 1 [Source:MGI Symbol;Acc:MGI:98763] [ENSMUST00000150027]	21877	NM_009387	ENSMUST00000153298///ENSMUST00000141939///ENSMUST00000129852///ENSMUST00000026661///ENSMUST00000150027
A_51_P279437|76574	1.63235e-20	3.43598e-23	5.32958	1.18684	-4.49056	5.92372	1.4188	-4.17515	Mfsd2a	major facilitator superfamily domain containing 2A	Mus musculus major facilitator superfamily domain containing 2A (Mfsd2a), mRNA [NM_029662]	76574	NM_029662	ENSMUST00000030408
A_52_P182520,A_55_P2935865,A_51_P421804,A_55_P2755119|30056	1.73079e-20	3.71192e-23	3.27242	1.29268	-2.53151	3.57812	1.5113	-2.36757	Timm9	translocase of inner mitochondrial membrane 9	translocase of inner mitochondrial membrane 9 [Source:MGI Symbol;Acc:MGI:1353436] [ENSMUST00000223544]///Mus musculus translocase of inner mitochondrial membrane 9 (Timm9), transcript variant 1, mRNA [NM_013896]	30056	NM_013896	ENSMUST00000223544///ENSMUST00000221178///ENSMUST00000221559
A_52_P541833|330192	1.97245e-20	4.30855e-23	4.02419	1.07365	-3.74816	4.48468	1.24293	-3.60816	Vps37b	vacuolar protein sorting 37B	Mus musculus vacuolar protein sorting 37B (Vps37b), mRNA [NM_177876]	330192	NM_177876	ENSMUST00000040967
A_65_P04508,A_55_P2015670,A_55_P1958840,A_55_P2742291,A_52_P324934|16403	2.11858e-20	4.79603e-23	4.34989	1.61914	-2.68655	4.34257	1.56061	-2.78262	Itga6	integrin alpha 6	Mus musculus integrin alpha 6 (Itga6), transcript variant 2, mRNA [NM_001277970]///Mus musculus integrin alpha 6 (Itga6), transcript variant 1, mRNA [NM_008397]///integrin alpha 6 [Source:MGI Symbol;Acc:MGI:96605] [ENSMUST00000139760]///integrin alpha 6 [Source:MGI Symbol;Acc:MGI:96605] [ENSMUST00000155249]	16403	NM_001277970///NM_008397	ENSMUST00000112101///ENSMUST00000139760///ENSMUST00000126787///ENSMUST00000155249
A_55_P2797217,A_55_P2740779|26941	2.11858e-20	4.77262e-23	-4.77823	-1.45171	3.29145	-5.12277	-1.45002	3.53289	Slc9a3r1	solute carrier family 9 (sodium/hydrogen exchanger), member 3 regulator 1	Mus musculus solute carrier family 9 (sodium/hydrogen exchanger), member 3 regulator 1 (Slc9a3r1), mRNA [NM_012030]	26941	NM_012030	ENSMUST00000021077
A_55_P2141860,A_55_P2145804,A_55_P2720760,A_65_P02117,A_52_P443705|68048	2.16929e-20	4.99696e-23	3.43885	1.40514	-2.44734	3.51334	1.61305	-2.17808	Aen	apoptosis enhancing nuclease	Mus musculus apoptosis enhancing nuclease (Aen), transcript variant 1, mRNA [NM_026531]///apoptosis enhancing nuclease [Source:MGI Symbol;Acc:MGI:1915298] [ENSMUST00000172017]///apoptosis enhancing nuclease [Source:MGI Symbol;Acc:MGI:1915298] [ENSMUST00000107425]	68048	NM_026531	ENSMUST00000107425///ENSMUST00000107421///ENSMUST00000172017///ENSMUST00000107423
A_51_P268154,A_52_P78203,A_55_P2739470|50790	2.17716e-20	5.10381e-23	2.70073	-1.03884	-2.80562	2.65359	-1.0964	-2.90938	Acsl4	acyl-CoA synthetase long-chain family member 4	Mus musculus acyl-CoA synthetase long-chain family member 4 (Acsl4), transcript variant 1, mRNA [NM_207625]	50790	NM_207625	ENSMUST00000033634///ENSMUST00000140520
A_66_P135838,A_55_P1962951|56389	2.17716e-20	5.18803e-23	-3.56702	-1.29714	2.7499	-3.63181	-1.29106	2.81305	Stx5a	syntaxin 5A	Mus musculus syntaxin 5A (Stx5a), transcript variant 1, mRNA [NM_019829]	56389	NM_019829	ENSMUST00000176260///ENSMUST00000073430
A_51_P500643,A_52_P343856,A_55_P2717235|208647	2.18731e-20	5.29909e-23	-4.68127	-1.54221	3.03543	-5.39171	-1.64857	3.27054	Creb3l2	cAMP responsive element binding protein 3-like 2	cAMP responsive element binding protein 3-like 2 [Source:MGI Symbol;Acc:MGI:2442695] [ENSMUST00000041093]///Mus musculus cAMP responsive element binding protein 3-like 2 (Creb3l2), mRNA [NM_178661]///cAMP responsive element binding protein 3-like 2 [Source:MGI Symbol;Acc:MGI:2442695] [ENSMUST00000128534]	208647	XM_006505824///NM_178661	ENSMUST00000041093///ENSMUST00000128534
A_55_P1972381|14621	2.21091e-20	5.44408e-23	4.31976	1.24877	-3.45922	4.66748	1.22812	-3.8005	Gjb4	gap junction protein, beta 4	Mus musculus gap junction protein, beta 4 (Gjb4), mRNA [NM_008127]	14621	NM_008127	ENSMUST00000106090
A_51_P277336|20324	2.25581e-20	5.64424e-23	-2.92046	-1.13647	2.56975	-3.11828	-1.17565	2.65238	Cavin2	caveolae associated 2	Mus musculus serum deprivation response (Sdpr), mRNA [NM_138741]	20324	NM_138741	ENSMUST00000051572
A_52_P102559|226539	2.88139e-20	7.32391e-23	-3.37792	-1.15377	2.92772	-3.53943	-1.10873	3.19232	Dars2	aspartyl-tRNA synthetase 2 (mitochondrial)	Mus musculus aspartyl-tRNA synthetase 2 (mitochondrial) (Dars2), mRNA [NM_172644]	226539	NM_172644	ENSMUST00000160759
A_51_P100289|20807	3.35417e-20	8.65885e-23	1.69043	-1.31225	-2.21827	1.73146	-1.42283	-2.46357	Srf	serum response factor	Mus musculus serum response factor (Srf), mRNA [NM_020493]	20807	NM_020493	ENSMUST00000015749
A_52_P54463,A_51_P507290|12224	3.87236e-20	1.06615e-22	4.99614	1.45902	-3.42432	5.87387	1.60881	-3.65107	Klf5	Kruppel-like factor 5	AF079852 intestinal-enriched Kruppel-like factor IKLF {Mus musculus} (exp=-1; wgp=0; cg=0), partial (74%) [TC1589112]///Mus musculus Kruppel-like factor 5 (Klf5), mRNA [NM_009769]	12224	NM_009769	ENSMUST00000005279
A_55_P2509543,A_55_P2094524|100043424	3.87236e-20	1.04058e-22	3.08385	1.17101	-2.63349	3.12129	1.19226	-2.61795	Gm14005	predicted gene 14005	Mus musculus predicted gene 14005 (Gm14005), transcript variant 3, long non-coding RNA [NR_028591]///Mus musculus predicted gene 14005 (Gm14005), transcript variant 2, long non-coding RNA [NR_028590]	100043424	NR_028591///NR_028590
A_55_P2736120,A_51_P393624,A_51_P489108|213081	3.87236e-20	1.0719e-22	-4.7025	-1.20817	3.89225	-4.39521	-1.43194	3.0694	Wdr19	WD repeat domain 19	WD repeat domain 19 [Source:MGI Symbol;Acc:MGI:2443231] [ENSMUST00000203653]///WD repeat domain 19 [Source:MGI Symbol;Acc:MGI:2443231] [ENSMUST00000204647]///Mus musculus WD repeat domain 19 (Wdr19), mRNA [NM_153391]	213081	XM_011240713///NM_153391	ENSMUST00000203653///ENSMUST00000204647
A_52_P64001,A_55_P2070179|28019	3.87236e-20	1.0405e-22	-2.78338	-1.02846	2.70637	-3.03138	-1.09644	2.76475	Ing4	inhibitor of growth family, member 4	Mus musculus inhibitor of growth family, member 4 (Ing4), mRNA [NM_133345]	28019	NM_133345	ENSMUST00000152574///ENSMUST00000032480
A_51_P367866|13653	3.87236e-20	1.07655e-22	-14.9697	-4.98468	3.00315	-13.54	-5.65356	2.39495	Egr1	early growth response 1	Mus musculus early growth response 1 (Egr1), mRNA [NM_007913]	13653	NM_007913	ENSMUST00000165033
A_55_P1994492|76179	4.50627e-20	1.28858e-22	3.40034	1.6496	-2.06132	3.79402	1.59555	-2.37788	Usp31	ubiquitin specific peptidase 31	Mus musculus ubiquitin specific peptidase 31 (Usp31), mRNA [NM_001033173]	76179	NM_001033173	ENSMUST00000046929
A_55_P2081616,A_52_P379531|21853	4.50627e-20	1.28681e-22	-2.26573	1.05024	2.37957	-2.38276	1.02605	2.44483	Timeless	timeless circadian clock 1	Mus musculus timeless circadian clock 1 (Timeless), transcript variant 4, mRNA [NM_001164081]///Mus musculus timeless circadian clock 1 (Timeless), transcript variant 2, mRNA [NM_011589]	21853	NM_001164081///NM_011589	ENSMUST00000105244///ENSMUST00000105243
A_55_P1983095|11492	4.6207e-20	1.33965e-22	4.27831	1.25313	-3.41408	4.89178	1.2402	-3.94435	Adam19	a disintegrin and metallopeptidase domain 19 (meltrin beta)	Mus musculus a disintegrin and metallopeptidase domain 19 (meltrin beta) (Adam19), transcript variant 3, mRNA [NM_001291891]	11492	NM_001291891	ENSMUST00000011400
A_55_P2109347,A_52_P207728,A_55_P2109354,A_55_P2085940|208266	5.36143e-20	1.5757e-22	3.37307	1.40674	-2.3978	3.45534	1.45177	-2.38009	Dot1l	DOT1-like, histone H3 methyltransferase (S. cerevisiae)	DOT1-like, histone H3 methyltransferase (S. cerevisiae) [Source:MGI Symbol;Acc:MGI:2143886] [ENSMUST00000149394]///Mus musculus DOT1-like, histone H3 methyltransferase (S. cerevisiae) (Dot1l), mRNA [NM_199322]///DOT1-like, histone H3 methyltransferase (S. cerevisiae) [Source:MGI Symbol;Acc:MGI:2143886] [ENSMUST00000105336]	208266	XM_006513432///NM_199322///XM_011243391	ENSMUST00000149394///ENSMUST00000163526///ENSMUST00000105336
A_55_P2168431|72345	5.45385e-20	1.65629e-22	-6.00047	-1.51898	3.95033	-6.311	-1.88865	3.34154	Amer1	APC membrane recruitment 1	Mus musculus APC membrane recruitment 1 (Amer1), mRNA [NM_175179]	72345	NM_175179	ENSMUST00000084535
A_55_P2016459,A_55_P2016462|15945	5.45385e-20	1.64751e-22	-11.8635	-1.66634	7.11951	-11.8754	-2.29355	5.17773	Cxcl10	chemokine (C-X-C motif) ligand 10	chemokine (C-X-C motif) ligand 10 [Source:MGI Symbol;Acc:MGI:1352450] [ENSMUST00000118006]///Mus musculus chemokine (C-X-C motif) ligand 10 (Cxcl10), mRNA [NM_021274]	15945	NM_021274	ENSMUST00000118006///ENSMUST00000038816
A_55_P2741010,A_51_P244655|229675	5.45385e-20	1.66785e-22	5.66785	1.53886	-3.68315	6.88623	1.50825	-4.56569	Rsbn1	rosbin, round spermatid basic protein 1	Mus musculus rosbin, round spermatid basic protein 1 (Rsbn1), mRNA [NM_172684]	229675	NM_172684	ENSMUST00000051139
A_51_P173043|13654	5.46266e-20	1.69223e-22	-9.98143	-20.9658	-2.10048	-10.3149	-31.2597	-3.03055	Egr2	early growth response 2	Mus musculus early growth response 2 (Egr2), transcript variant 1, mRNA [NM_010118]	13654	NM_010118	ENSMUST00000048289
A_55_P2797368,A_52_P231893,A_52_P493099|106633	5.54552e-20	1.73993e-22	-4.72646	-1.30866	3.61167	-4.49186	-1.49512	3.00435	Ift140	intraflagellar transport 140	Mus musculus intraflagellar transport 140 (Ift140), mRNA [NM_134126]///intraflagellar transport 140 [Source:MGI Symbol;Acc:MGI:2146906] [ENSMUST00000142000]	106633	NM_134126	ENSMUST00000024983///ENSMUST00000140692///ENSMUST00000142000
A_51_P223458,A_55_P2809542|67065	6.03085e-20	1.91615e-22	2.48127	1.00025	-2.48064	2.70472	1.02074	-2.64977	Polr3d	polymerase (RNA) III (DNA directed) polypeptide D	Mus musculus polymerase (RNA) III (DNA directed) polypeptide D (Polr3d), transcript variant 1, mRNA [NM_025945]	67065	NM_025945	ENSMUST00000000793
A_55_P2482723,A_55_P1989384|66510	6.28486e-20	2.02182e-22	-2.024	-1.0329	1.95953	-2.10469	-1.02646	2.05042	Rnf181	ring finger protein 181	Mus musculus ring finger protein 181 (Rnf181), transcript variant 2, mRNA [NM_001331167]	66510	NM_001331167	ENSMUST00000205969///ENSMUST00000069595
A_55_P1967538|26559	7.02441e-20	2.28763e-22	-3.57319	-1.22205	2.92394	-3.81566	-1.33062	2.86758	Hunk	hormonally upregulated Neu-associated kinase	Mus musculus hormonally upregulated Neu-associated kinase (Hunk), mRNA [NM_015755]	26559	NM_015755	ENSMUST00000065856
A_66_P136228,A_52_P430229|75646	7.17615e-20	2.36554e-22	3.67294	1.25048	-2.93722	3.89244	1.23426	-3.15367	Rai14	retinoic acid induced 14	Mus musculus retinoic acid induced 14 (Rai14), transcript variant 1, mRNA [NM_030690]///Q6ZPT6_MOUSE (Q6ZPT6) MKIAA1334 protein (Fragment), partial (16%) [TC1649023]	75646	NM_030690	ENSMUST00000090339
A_52_P369415,A_52_P414464,A_55_P1961736|53901	7.22129e-20	2.4091e-22	7.58777	2.1164	-3.58522	7.6454	2.43863	-3.13512	Rcan2	regulator of calcineurin 2	Mus musculus regulator of calcineurin 2 (Rcan2), transcript variant 1, mRNA [NM_207649]///Mus musculus regulator of calcineurin 2 (Rcan2), transcript variant 3, mRNA [NM_001286653]	53901	NM_207649///NM_001286653	ENSMUST00000177857///ENSMUST00000044895
A_51_P377856|103140	7.34523e-20	2.47962e-22	-4.46057	-1.28826	3.46248	-3.95585	-1.33183	2.97024	Gstt3	glutathione S-transferase, theta 3	Mus musculus glutathione S-transferase, theta 3 (Gstt3), transcript variant 1, mRNA [NM_133994]	103140	NM_133994	ENSMUST00000001715
A_51_P155196|99382	7.69308e-20	2.62761e-22	4.97019	1.33938	-3.71083	5.55636	1.48952	-3.7303	Abtb2	ankyrin repeat and BTB (POZ) domain containing 2	Mus musculus ankyrin repeat and BTB (POZ) domain containing 2 (Abtb2), mRNA [NM_178890]	99382	NM_178890	ENSMUST00000076212
A_55_P2746348|14726	7.74303e-20	2.67542e-22	2.99596	1.22773	-2.44024	3.36897	1.2267	-2.74637	Pdpn	podoplanin	Mus musculus podoplanin (Pdpn), transcript variant 1, mRNA [NM_010329]	14726	NM_010329	ENSMUST00000030317
A_52_P265584,A_51_P112308|69068	7.89224e-20	2.75832e-22	-2.9955	-3.7894	-1.26503	-3.12897	-4.22027	-1.34877	1810011O10Rik	RIKEN cDNA 1810011O10 gene	RIKEN cDNA 1810011O10 gene [Source:MGI Symbol;Acc:MGI:1916318] [ENSMUST00000052622]///Mus musculus RIKEN cDNA 1810011O10 gene (1810011O10Rik), mRNA [NM_026931]	69068	NM_026931	ENSMUST00000052622
A_55_P1997936,A_51_P250934,A_55_P1964598|15490	8.03267e-20	2.8393e-22	1.95694	-2.17186	-4.25021	2.14691	-1.84415	-3.95923	Hsd17b7	hydroxysteroid (17-beta) dehydrogenase 7	Mus musculus hydroxysteroid (17-beta) dehydrogenase 7 (Hsd17b7), mRNA [NM_010476]///hydroxysteroid (17-beta) dehydrogenase 7 [Source:MGI Symbol;Acc:MGI:1330808] [ENSMUST00000111353]	15490	NM_010476///XM_011238758	ENSMUST00000027989///ENSMUST00000111353
A_55_P1970954|208076	8.14079e-20	2.90985e-22	-6.52484	-1.65665	3.93858	-9.54159	-1.79194	5.32473	Pknox2	Pbx/knotted 1 homeobox 2	Mus musculus Pbx/knotted 1 homeobox 2 (Pknox2), transcript variant 2, mRNA [NM_001029838]	208076	NM_001029838	ENSMUST00000039674
A_55_P2022251|12581	8.20029e-20	2.96368e-22	-3.65008	-1.18471	3.081	-4.39255	-1.23852	3.5466	Cdkn2d	cyclin-dependent kinase inhibitor 2D (p19, inhibits CDK4)	Mus musculus cyclin-dependent kinase inhibitor 2D (p19, inhibits CDK4) (Cdkn2d), mRNA [NM_009878]	12581	NM_009878	ENSMUST00000086374
A_66_P125136,A_55_P2838379|68841	8.26283e-20	3.05192e-22	-3.05264	-1.03682	2.94424	-2.936	-1.03916	2.82535	Lppos	LIM domain containing preferred translocation partner in lipoma, opposite strand	Q6ZLD4_ORYSA (Q6ZLD4) Cyclophylin-like protein, partial (5%) [TC1621609]///Mus musculus LIM domain containing preferred translocation partner in lipoma, opposite strand (Lppos), long non-coding RNA [NR_037954]	68841	NR_037954
A_55_P2713340,A_55_P2104487|18805	8.26283e-20	3.02789e-22	-4.47435	-1.29831	3.44628	-5.59103	-1.60296	3.48794	Pld1	phospholipase D1	phospholipase D1 [Source:MGI Symbol;Acc:MGI:109585] [ENSMUST00000131842]///Mus musculus phospholipase D1 (Pld1), transcript variant 1, mRNA [NM_001164056]	18805	NM_001164056	ENSMUST00000131842///ENSMUST00000067757
A_55_P1975877,A_51_P309307|229672	8.9162e-20	3.32866e-22	10.3534	2.86607	-3.61239	11.7161	3.6624	-3.19903	Bcl2l15	BCLl2-like 15	Mus musculus BCLl2-like 15 (Bcl2l15), transcript variant 2, mRNA [NM_001142960]///Mus musculus BCLl2-like 15 (Bcl2l15), transcript variant 1, mRNA [NM_001142959]	229672	NM_001142960///NM_001142959	ENSMUST00000106822///ENSMUST00000062945
A_55_P2803244,A_51_P379775|106582	9.53887e-20	3.61404e-22	-3.42972	-1.1791	2.90876	-3.10706	-1.17058	2.65428	Nrm	nurim (nuclear envelope membrane protein)	Mus musculus nurim (nuclear envelope membrane protein) (Nrm), mRNA [NM_134122]	106582	NM_134122	ENSMUST00000074259
A_55_P1995074|319370	9.53887e-20	3.63689e-22	-5.58343	-1.22683	4.55111	-5.99171	-1.24525	4.81165	Ubald2	UBA-like domain containing 2	Mus musculus UBA-like domain containing 2 (Ubald2), mRNA [NM_176902]	319370	NM_176902	ENSMUST00000057676
A_51_P262208|16414	9.80683e-20	3.778e-22	4.55916	3.0699	-1.48512	4.97121	2.95858	-1.68027	Itgb2	integrin beta 2	Mus musculus integrin beta 2 (Itgb2), mRNA [NM_008404]	16414	NM_008404	ENSMUST00000156644
A_51_P209327|30878	9.83617e-20	3.82837e-22	8.88404	2.70189	-3.28808	8.90887	2.69756	-3.30257	Apln	apelin	Mus musculus apelin (Apln), mRNA [NM_013912]	30878	NM_013912	ENSMUST00000039026
A_52_P368532,A_51_P445153|24064	1.02462e-19	4.02866e-22	2.53781	-1.10482	-2.80383	2.86743	1.00977	-2.83969	Spry2	sprouty homolog 2 (Drosophila)	Mus musculus sprouty homolog 2 (Drosophila) (Spry2), mRNA [NM_011897]	24064	NM_011897	ENSMUST00000022709
A_55_P2929462,A_55_P1989653,A_55_P2717134|108115	1.04932e-19	4.16743e-22	3.7418	4.18122	1.11743	3.2542	3.87942	1.19213	Slco4a1	solute carrier organic anion transporter family, member 4a1	Mus musculus solute carrier organic anion transporter family, member 4a1 (Slco4a1), mRNA [NM_148933]///solute carrier organic anion transporter family, member 4a1 [Source:MGI Symbol;Acc:MGI:1351866] [ENSMUST00000138446]	108115	NM_148933	ENSMUST00000038225///ENSMUST00000139902///ENSMUST00000138446
A_51_P326191|20715	1.13576e-19	4.55586e-22	-5.68834	-2.08718	2.72537	-5.5596	-2.49556	2.2278	Serpina3g	serine (or cysteine) peptidase inhibitor, clade A, member 3G	Mus musculus serine (or cysteine) peptidase inhibitor, clade A, member 3G (Serpina3g), mRNA [NM_009251]	20715	NM_009251	ENSMUST00000043315
A_51_P357744,A_55_P2892246|16478	1.14707e-19	4.64677e-22	-3.73394	-2.56145	1.45774	-3.86623	-2.4491	1.57864	Jund	jun D proto-oncogene	Mus musculus jun D proto-oncogene (Jund), transcript variant 1, mRNA [NM_010592]///Mus musculus jun D proto-oncogene (Jund), transcript variant 1, mRNA [NM_001286944]	16478	NM_010592///NM_001286944	ENSMUST00000095267
A_55_P2904563,A_66_P127550|280411	1.212e-19	4.95796e-22	-2.56129	-1.05089	2.43725	-2.58664	-1.13498	2.27901	Lix1l	Lix1-like	Mus musculus Lix1-like (Lix1l), mRNA [NM_001163170]///Lix1-like [Source:MGI Symbol;Acc:MGI:3036267] [ENSMUST00000062058]	280411	NM_001163170	ENSMUST00000062058
A_51_P168439,A_55_P1962284|75785	1.36304e-19	5.62993e-22	-11.4872	1.06848	12.2738	-14.2082	-1.45812	9.74418	Klhl24	kelch-like 24	PREDICTED: Mus musculus kelch-like 24 (Klhl24), transcript variant X1, mRNA [XM_006522687]///Mus musculus kelch-like 24 (Klhl24), mRNA [NM_029436]	75785	XM_006522687///NM_029436	ENSMUST00000023509
A_52_P28651|58235	1.41246e-19	5.89015e-22	4.7736	1.26783	-3.76517	4.45287	1.2958	-3.43638	Nectin1	nectin cell adhesion molecule 1	Mus musculus nectin cell adhesion molecule 1 (Nectin1), mRNA [NM_021424]	58235	NM_021424	ENSMUST00000034510
A_55_P2070331,A_51_P419246|381232	1.4509e-19	6.16569e-22	5.35846	1.63663	-3.27409	6.86131	1.85617	-3.69648	Mirt1	myocardial infarction associated transcript 1	Q6N6K5_RHOPA (Q6N6K5) Aliphatic sulfonate transport ATP-binding protein, Subunit of ABC transporter, partial (6%) [TC1705349]///Mus musculus myocardial infarction associated transcript 1 (Mirt1), long non-coding RNA [NR_028427]	381232	NR_028427
A_55_P2154387,A_51_P383741|12159	1.4509e-19	6.10998e-22	-5.74722	-1.4737	3.89985	-5.58935	-1.70301	3.28203	Bmp4	bone morphogenetic protein 4	Mus musculus bone morphogenetic protein 4 (Bmp4), transcript variant 1, mRNA [NM_007554]	12159	NM_007554	ENSMUST00000100676
A_55_P2308835,A_55_P2051791,A_51_P122373,A_55_P1968240|234309	1.53893e-19	6.6009e-22	-3.56742	-1.27554	2.7968	-3.83198	-1.35098	2.83645	Cbr4	carbonyl reductase 4	carbonyl reductase 4 [Source:MGI Symbol;Acc:MGI:2384567] [ENSMUST00000034058]///Mus musculus carbonyl reductase 4 (Cbr4), mRNA [NM_145595]	234309	NM_145595	ENSMUST00000034058///ENSMUST00000156535///ENSMUST00000130495
A_30_P01019123	1.58341e-19	6.85459e-22	-2.63551	-1.10345	2.38842	-2.72737	-1.14017	2.39207			lincRNA:chr17:95150800-95180650 forward strand
A_55_P2727434,A_51_P399614|67235	1.60315e-19	7.00369e-22	-3.48109	1.00798	3.50887	-3.94736	-1.06365	3.71115	Zkscan14	zinc finger with KRAB and SCAN domains 14	zinc finger with KRAB and SCAN domains 14 [Source:MGI Symbol;Acc:MGI:1914485] [ENSMUST00000198959]///Mus musculus zinc finger with KRAB and SCAN domains 14 (Zkscan14), mRNA [NM_023322]	67235	NM_023322	ENSMUST00000198959///ENSMUST00000031632
A_55_P1956572,A_52_P242962|98193	1.75074e-19	7.71802e-22	-3.32198	-1.26486	2.62635	-3.37378	-1.3598	2.48109	Dcaf8	DDB1 and CUL4 associated factor 8	Mus musculus DDB1 and CUL4 associated factor 8 (Dcaf8), mRNA [NM_153555]	98193	NM_153555	ENSMUST00000192704///ENSMUST00000193638
A_51_P372826,A_66_P107703|228608	1.8554e-19	8.25308e-22	3.29117	1.24907	-2.63489	3.27129	1.43477	-2.28001	Smox	spermine oxidase	Mus musculus spermine oxidase (Smox), transcript variant 2, mRNA [NM_145533]	228608	NM_145533	ENSMUST00000151143///ENSMUST00000183881
A_55_P2033120|76650	1.9093e-19	8.70251e-22	3.69302	1.29582	-2.84996	3.6796	1.26859	-2.90055	Srxn1	sulfiredoxin 1 homolog (S. cerevisiae)	Mus musculus sulfiredoxin 1 homolog (S. cerevisiae) (Srxn1), mRNA [NM_029688]	76650	NM_029688	ENSMUST00000041500
A_55_P2107207	1.9093e-19	8.57549e-22	2.81266	1.63176	-1.72369	2.91019	1.60075	-1.81802			G protein-coupled receptor 137B, pseudogene [Source:MGI Symbol;Acc:MGI:3710533] [ENSMUST00000221825]		XR_382078	ENSMUST00000221825
A_52_P542005,A_55_P2934727|66583	1.9093e-19	8.74578e-22	2.58374	1.22709	-2.10558	2.78563	1.43275	-1.94424	Exosc1	exosome component 1	Mus musculus exosome component 1 (Exosc1), transcript variant 1, mRNA [NM_025644]	66583	NM_025644	ENSMUST00000075280
A_52_P306305|11641	1.9093e-19	8.79617e-22	2.05045	-1.30863	-2.68327	2.42542	-1.38607	-3.3618	Akap2	A kinase (PRKA) anchor protein 2	Mus musculus A kinase (PRKA) anchor protein 2 (Akap2), transcript variant 1, mRNA [NM_001035533]	11641	NM_001035533	ENSMUST00000150412
A_55_P2063237,A_66_P120606|240672	1.95751e-19	9.12428e-22	4.22719	-1.17059	-4.94829	4.73773	-1.22422	-5.8	Dusp5	dual specificity phosphatase 5	Mus musculus dual specificity phosphatase 5 (Dusp5), mRNA [NM_001085390]///dual specificity phosphatase 5 [Source:MGI Symbol;Acc:MGI:2685183] [ENSMUST00000038287]	240672	NM_001085390	ENSMUST00000038287
A_51_P131408|27279	1.95751e-19	9.17376e-22	5.56384	1.34589	-4.13395	6.74121	1.5964	-4.22276	Tnfrsf12a	tumor necrosis factor receptor superfamily, member 12a	Mus musculus tumor necrosis factor receptor superfamily, member 12a (Tnfrsf12a), transcript variant 1, mRNA [NM_013749]	27279	NM_013749	ENSMUST00000024698
A_51_P117995|18642	1.97579e-19	9.33789e-22	-2.89641	-1.2653	2.28911	-2.90141	-1.30645	2.22083	Pfkm	phosphofructokinase, muscle	Mus musculus phosphofructokinase, muscle (Pfkm), transcript variant 2, mRNA [NM_021514]	18642	NM_021514	ENSMUST00000051226
A_55_P2943448,A_55_P2492753|68877	1.98489e-19	9.45973e-22	-2.82492	-1.24001	2.27814	-2.99091	-1.27273	2.35	Maf1	MAF1 homolog, negative regulator of RNA polymerase III	Mus musculus MAF1 homolog, negative regulator of RNA polymerase III (Maf1), transcript variant 1, mRNA [NM_001164607]	68877	NM_001164607	ENSMUST00000161527///ENSMUST00000162865
A_55_P2809274|108897	1.99024e-19	9.56429e-22	5.61574	1.73067	-3.24483	5.84386	2.05804	-2.83953	Aif1l	allograft inflammatory factor 1-like	Mus musculus allograft inflammatory factor 1-like (Aif1l), mRNA [NM_145144]	108897	NM_145144	ENSMUST00000001920
A_55_P2010161,A_51_P448866|380601	1.99612e-19	9.67179e-22	2.94878	1.41583	-2.08272	3.10824	1.55233	-2.00231	Fastkd5	FAST kinase domains 5	Mus musculus FAST kinase domains 5 (Fastkd5), transcript variant 1, mRNA [NM_198176]	380601	NM_198176	ENSMUST00000110262///ENSMUST00000179273
A_55_P2725697,A_51_P157223|102639958	2.02377e-19	9.88619e-22	5.89809	2.04186	-2.88858	6.77747	1.98082	-3.42155	LOC102639958	uncharacterized LOC102639958	PREDICTED: Mus musculus uncharacterized LOC102639958 (LOC102639958), ncRNA [XR_001784889]	102639958	XR_001784889
A_55_P2508006|101669761	2.17309e-19	1.07019e-21	5.07565	1.45345	-3.49213	5.04845	1.62694	-3.10304	Gm15694	NADH dehydrogenase (ubiquinone) 1 alpha subcomplex, 7 (B14.5a), pseudogene	Mus musculus predicted gene 15694 (Gm15694), non-coding RNA [NR_103513]	101669761	NR_103513
A_51_P419959|74427	2.18001e-19	1.08225e-21	5.34711	1.40275	-3.81189	5.92959	1.59893	-3.70847	Eaf1	ELL associated factor 1	Mus musculus ELL associated factor 1 (Eaf1), mRNA [NM_028932]	74427	NM_028932	ENSMUST00000022446
A_51_P157042|14219	2.23932e-19	1.12059e-21	3.71856	1.0929	-3.40247	4.20603	-1.07269	-4.51175	Ctgf	connective tissue growth factor	Mus musculus connective tissue growth factor (Ctgf), mRNA [NM_010217]	14219	NM_010217	ENSMUST00000020171
A_52_P625277,A_55_P2751069|329470	2.3994e-19	1.21023e-21	-3.31079	-1.12551	2.94159	-3.11812	-1.19443	2.61054	Accs	1-aminocyclopropane-1-carboxylate synthase (non-functional)	Mus musculus 1-aminocyclopropane-1-carboxylate synthase (non-functional) (Accs), transcript variant 2, mRNA [NM_183220]	329470	NM_183220	ENSMUST00000041593///ENSMUST00000130077
A_51_P439876,A_55_P1987914|26921	2.60916e-19	1.32639e-21	2.43176	1.37691	-1.76611	2.56528	1.25322	-2.04695	Map4k4	mitogen-activated protein kinase kinase kinase kinase 4	Mus musculus mitogen-activated protein kinase kinase kinase kinase 4 (Map4k4), transcript variant 1, mRNA [NM_001252200]	26921	NM_001252200	ENSMUST00000163854///ENSMUST00000192509
A_65_P09236,A_51_P133582|12418	2.62462e-19	1.34467e-21	-3.87831	-1.8836	2.05899	-4.43906	-2.03208	2.18449	Cbx4	chromobox 4	Mus musculus chromobox 4 (Cbx4), mRNA [NM_007625]	12418	NM_007625	ENSMUST00000026665
A_55_P2732483,A_55_P2128929|231214	3.2762e-19	1.69802e-21	-7.93867	-1.6118	4.92534	-7.79016	-2.181	3.57183	Cc2d2a	coiled-coil and C2 domain containing 2A	Mus musculus coiled-coil and C2 domain containing 2A (Cc2d2a), mRNA [NM_172274]	231214	NM_172274	ENSMUST00000142303///ENSMUST00000127355
A_66_P117695|22687	3.2762e-19	1.71271e-21	2.44958	1.08113	-2.26577	2.51769	1.16716	-2.15711	Zpr1	ZPR1 zinc finger	Mus musculus ZPR1 zinc finger (Zpr1), mRNA [NM_011752]	22687	NM_011752	ENSMUST00000156440
A_51_P488554,A_55_P2717787|68067	3.2762e-19	1.71754e-21	-6.45841	-1.15378	5.5976	-7.00071	-1.07755	6.49687	Mrnip	MRN complex interacting protein	Mus musculus MRN complex interacting protein (Mrnip), mRNA [NM_026543]///MRN complex interacting protein [Source:MGI Symbol;Acc:MGI:1915317] [ENSMUST00000143480]	68067	NM_026543	ENSMUST00000020647///ENSMUST00000143480
A_51_P281380|56224	3.47141e-19	1.83366e-21	2.67431	1.23483	-2.16573	2.80043	1.35467	-2.06725	Tspan5	tetraspanin 5	Mus musculus tetraspanin 5 (Tspan5), transcript variant 1, mRNA [NM_019571]	56224	NM_019571	ENSMUST00000142890
A_51_P179041,A_66_P115604|21679	3.49393e-19	1.87331e-21	7.04196	-1.20694	-8.49922	7.29945	1.03321	-7.06485	Tead4	TEA domain family member 4	Mus musculus TEA domain family member 4 (Tead4), transcript variant 1, mRNA [NM_011567]	21679	NM_011567	ENSMUST00000006311///ENSMUST00000112157
A_66_P127815,A_52_P579448|230751	3.49393e-19	1.86174e-21	-3.15298	-1.29058	2.44308	-3.04462	-1.34441	2.26465	Oscp1	organic solute carrier partner 1	organic solute carrier partner 1 [Source:MGI Symbol;Acc:MGI:1916308] [ENSMUST00000035497]///Mus musculus organic solute carrier partner 1 (Oscp1), mRNA [NM_172701]	230751	XM_006503034///NM_172701	ENSMUST00000035497///ENSMUST00000129968
A_55_P2137783,A_55_P2042958|19360	3.50014e-19	1.89054e-21	-2.50716	-1.10013	2.27896	-2.74478	-1.14245	2.40253	Rad50	RAD50 double strand break repair protein	Mus musculus RAD50 double strand break repair protein (Rad50), mRNA [NM_009012]	19360	NM_009012	ENSMUST00000152598///ENSMUST00000020649
A_51_P252859|16007	3.54999e-19	1.93156e-21	-1.2888	-2.55687	-1.98392	-1.11755	-3.14299	-2.81239	Cyr61	cysteine rich protein 61	Mus musculus cysteine rich protein 61 (Cyr61), mRNA [NM_010516]	16007	NM_010516	ENSMUST00000029846
A_55_P2802813|75788	3.62359e-19	1.986e-21	2.88839	1.16225	-2.48517	3.01181	1.33858	-2.25	Smurf1	SMAD specific E3 ubiquitin protein ligase 1	Mus musculus SMAD specific E3 ubiquitin protein ligase 1 (Smurf1), transcript variant 1, mRNA [NM_001038627]	75788	NM_001038627	ENSMUST00000085684
A_65_P16680|56336	3.64512e-19	2.01228e-21	3.92721	1.77689	-2.21016	4.36053	1.68338	-2.59033	B4galt5	UDP-Gal:betaGlcNAc beta 1,4-galactosyltransferase, polypeptide 5	Mus musculus UDP-Gal:betaGlcNAc beta 1,4-galactosyltransferase, polypeptide 5 (B4galt5), mRNA [NM_019835]	56336	NM_019835	ENSMUST00000109221
A_66_P137605,A_55_P2141241|214763	3.86558e-19	2.14934e-21	1.99711	1.06635	-1.87284	1.97518	1.06824	-1.84901	Mb21d1	Mab-21 domain containing 1	Mus musculus Mab-21 domain containing 1 (Mb21d1), transcript variant 1, mRNA [NM_173386]	214763	NM_173386	ENSMUST00000070742///ENSMUST00000127190
A_51_P474459|12702	4.06631e-19	2.29229e-21	-4.03663	-2.5832	1.56265	-4.32708	-3.11196	1.39047	Socs3	suppressor of cytokine signaling 3	Mus musculus suppressor of cytokine signaling 3 (Socs3), mRNA [NM_007707]	12702	NM_007707	ENSMUST00000054002
A_51_P283708,A_55_P2713640|17685	4.06631e-19	2.29324e-21	-2.06702	1.12166	2.31849	-2.15373	1.0465	2.25387	Msh2	mutS homolog 2	Mus musculus mutS homolog 2 (Msh2), mRNA [NM_008628]///mutS homolog 2 [Source:MGI Symbol;Acc:MGI:101816] [ENSMUST00000174240]	17685	NM_008628	ENSMUST00000024967///ENSMUST00000174240
A_52_P43423,A_55_P2187266|67724	4.29659e-19	2.44018e-21	3.43037	1.5418	-2.2249	3.70181	1.88808	-1.96062	Pop1	processing of precursor 1, ribonuclease P/MRP family, (S. cerevisiae)	Q8K205_MOUSE (Q8K205) Processing ofs 1 homolog, isoform 1, partial (32%) [TC1598042]///Mus musculus processing of precursor 1, ribonuclease P/MRP family, (S. cerevisiae) (Pop1), transcript variant 1, mRNA [NM_152894]	67724	NM_152894	ENSMUST00000079028
A_52_P361993,A_51_P266546|67306	4.46119e-19	2.55138e-21	-2.41242	-1.02111	2.36255	-2.6508	-1.16313	2.27902	Zc2hc1a	zinc finger, C2HC-type containing 1A	Mus musculus zinc finger, C2HC-type containing 1A (Zc2hc1a), mRNA [NM_173181]	67306	NM_173181	ENSMUST00000192835///ENSMUST00000051064
A_51_P104012|72309	4.59833e-19	2.64807e-21	4.5116	1.37244	-3.28728	4.22977	1.506	-2.80861	Tmem158	transmembrane protein 158	Mus musculus transmembrane protein 158 (Tmem158), mRNA [NM_001002267]	72309	NM_001002267	ENSMUST00000068140
A_55_P2065966|67655	4.64964e-19	2.69609e-21	2.95176	1.30392	-2.26376	3.23154	1.52309	-2.1217	Ctdp1	CTD (carboxy-terminal domain, RNA polymerase II, polypeptide A) phosphatase, subunit 1	Mus musculus CTD (carboxy-terminal domain, RNA polymerase II, polypeptide A) phosphatase, subunit 1 (Ctdp1), mRNA [NM_026295]	67655	NM_026295	ENSMUST00000161003
A_66_P114054|100126824	4.72466e-19	2.75835e-21	3.58839	1.09613	-3.27368	3.6061	1.2899	-2.79563	Sco2	SCO2 cytochrome c oxidase assembly protein	Mus musculus SCO2 cytochrome c oxidase assembly protein (Sco2), mRNA [NM_001111288]	100126824	NM_001111288	ENSMUST00000167643
A_55_P2047514,A_52_P326808,A_55_P1961567|66090	4.93508e-19	2.9008e-21	-8.15753	-1.33587	6.10653	-6.9615	-1.47215	4.7288	Ypel3	yippee-like 3 (Drosophila)	yippee-like 3 (Drosophila) [Source:MGI Symbol;Acc:MGI:1913340] [ENSMUST00000106359]///Mus musculus yippee-like 3 (Drosophila) (Ypel3), mRNA [NM_026875]	66090	XM_017312227///NM_026875	ENSMUST00000106359///ENSMUST00000156891///ENSMUST00000106356
A_55_P1968808,A_55_P2495127,A_51_P158044|52639	4.96306e-19	2.93695e-21	-2.40949	1.06322	2.56182	-2.31978	-1.056	2.19676	Wipi1	WD repeat domain, phosphoinositide interacting 1	Mus musculus WD repeat domain, phosphoinositide interacting 1 (Wipi1), mRNA [NM_145940]///WD repeat domain, phosphoinositide interacting 1 [Source:MGI Symbol;Acc:MGI:1261864] [ENSMUST00000047186]	52639	NM_145940	ENSMUST00000106689///ENSMUST00000103060///ENSMUST00000047186
A_51_P233954|140742	5.13662e-19	3.06006e-21	-4.42368	-1.35315	3.26918	-5.21448	-1.54417	3.37687	Sesn1	sestrin 1	Mus musculus sestrin 1 (Sesn1), transcript variant 2, mRNA [NM_001013370]	140742	NM_001013370	ENSMUST00000099931
A_51_P404077|57265	5.26279e-19	3.15613e-21	-2.5203	-1.17307	2.14846	-2.99736	-1.25774	2.38313	Fzd2	frizzled class receptor 2	Mus musculus frizzled class receptor 2 (Fzd2), mRNA [NM_020510]	57265	NM_020510	ENSMUST00000057893
A_55_P1981366|16782	5.3842e-19	3.26145e-21	15.076	1.63937	-9.19617	14.0591	1.78478	-7.87718	Lamc2	laminin, gamma 2	Mus musculus laminin, gamma 2 (Lamc2), mRNA [NM_008485]	16782	NM_008485	ENSMUST00000027753
A_51_P387188|101568	5.3842e-19	3.27171e-21	-2.0888	-1.11054	1.88089	-2.17765	-1.09081	1.99635	Vrk3	vaccinia related kinase 3	Mus musculus vaccinia related kinase 3 (Vrk3), mRNA [NM_133945]	101568	NM_133945	ENSMUST00000002275
A_55_P2122300,A_65_P06633|66935	5.39664e-19	3.3007e-21	-2.61692	-1.22817	2.13075	-2.84915	-1.41105	2.01917	Cir1	corepressor interacting with RBPJ, 1	Mus musculus corepressor interacting with RBPJ, 1 (Cir1), mRNA [NM_025854]	66935	NM_025854	ENSMUST00000208940///ENSMUST00000118681
A_51_P370510|217887	5.41423e-19	3.33296e-21	5.24162	1.1498	-4.55873	5.26573	1.19673	-4.40008	BC022687	cDNA sequence BC022687	Mus musculus cDNA sequence BC022687 (BC022687), mRNA [NM_145450]	217887	NM_145450	ENSMUST00000037014
A_66_P128079,A_51_P242400|16691	5.7345e-19	3.55289e-21	3.11731	-1.61575	-5.03679	2.84382	-1.55297	-4.41637	Krt8	keratin 8	Mus musculus keratin 8 (Krt8), mRNA [NM_031170]	16691	NM_031170	ENSMUST00000023952
A_52_P663384,A_51_P150608|67767	5.91267e-19	3.70121e-21	2.6519	1.14133	-2.32351	2.68001	1.24025	-2.16086	Jagn1	jagunal homolog 1	jagunal homolog 1 [Source:MGI Symbol;Acc:MGI:1915017] [ENSMUST00000204287]///Mus musculus jagunal homolog 1 (Jagn1), transcript variant 1, mRNA [NM_026365]	67767	NM_026365	ENSMUST00000204287///ENSMUST00000204254
A_55_P2745057,A_55_P2745054,A_51_P433870|22341	5.91267e-19	3.71024e-21	2.81397	-1.15277	-3.24386	2.74449	-1.18544	-3.25344	Vegfc	vascular endothelial growth factor C	Mus musculus vascular endothelial growth factor C (Vegfc), mRNA [NM_009506]	22341	NM_009506	ENSMUST00000210831///ENSMUST00000033919
A_52_P384956,A_55_P2073308|30948	6.04192e-19	3.83934e-21	2.4081	1.18357	-2.03461	2.67215	1.27992	-2.08776	Bin1	bridging integrator 1	Mus musculus bridging integrator 1 (Bin1), transcript variant 1, mRNA [NM_009668]	30948	NM_009668	ENSMUST00000091967///ENSMUST00000025239
A_66_P128986|12532	6.04192e-19	3.82416e-21	-2.54238	-1.29955	1.95636	-2.67361	-1.29444	2.06547	Cdc25c	cell division cycle 25C	Mus musculus cell division cycle 25C (Cdc25c), mRNA [NM_009860]	12532	NM_009860	ENSMUST00000060710
A_55_P2017911,A_51_P195506,A_55_P2169669,A_55_P2017914|12977	6.3951e-19	4.08916e-21	2.24473	1.63607	-1.37202	2.38723	1.68169	-1.41954	Csf1	colony stimulating factor 1 (macrophage)	colony stimulating factor 1 (macrophage) [Source:MGI Symbol;Acc:MGI:1339753] [ENSMUST00000120654]///Mus musculus colony stimulating factor 1 (macrophage) (Csf1), transcript variant 1, mRNA [NM_007778]///Mus musculus colony stimulating factor 1 (macrophage) (Csf1), transcript variant 3, mRNA [NM_001113530]	12977	NM_007778///NM_001113530	ENSMUST00000120654///ENSMUST00000014743///ENSMUST00000120243
A_51_P173709,A_55_P2137828|64297	6.42492e-19	4.15927e-21	3.47195	1.52898	-2.27077	3.51388	1.48678	-2.36341	Gprc5b	G protein-coupled receptor, family C, group 5, member B	Mus musculus G protein-coupled receptor, family C, group 5, member B (Gprc5b), transcript variant 2, mRNA [NM_022420]	64297	NM_022420	ENSMUST00000008878
A_51_P423356,A_55_P2743040|71206	6.42492e-19	4.15007e-21	-7.0763	-1.18004	5.99664	-6.22294	-1.35807	4.58218	Katnal2	katanin p60 subunit A-like 2	Mus musculus katanin p60 subunit A-like 2 (Katnal2), mRNA [NM_027721]///katanin p60 subunit A-like 2 [Source:MGI Symbol;Acc:MGI:1924234] [ENSMUST00000123650]	71206	NM_027721	ENSMUST00000154053///ENSMUST00000123650
A_52_P298854,A_55_P2719817,A_52_P458229,A_52_P574214|72462	6.50213e-19	4.23507e-21	2.49586	1.17479	-2.12452	2.58746	1.21733	-2.12552	Rrp1b	ribosomal RNA processing 1 homolog B (S. cerevisiae)	Mus musculus ribosomal RNA processing 1 homolog B (S. cerevisiae) (Rrp1b), transcript variant 1, mRNA [NM_028244]///ribosomal RNA processing 1 homolog B (S. cerevisiae) [Source:MGI Symbol;Acc:MGI:1919712] [ENSMUST00000150151]	72462	NM_028244	ENSMUST00000150187///ENSMUST00000150151///ENSMUST00000147076///ENSMUST00000137917
A_55_P2100884|14221	6.85157e-19	4.54193e-21	4.51146	1.56684	-2.87934	4.55777	1.47687	-3.08611	Fjx1	four jointed box 1 (Drosophila)	Mus musculus four jointed box 1 (Drosophila) (Fjx1), mRNA [NM_010218]	14221	NM_010218	ENSMUST00000099678
A_55_P2009069,A_55_P1968723,A_51_P189777|12457	6.85157e-19	4.54431e-21	2.84114	1.16477	-2.43923	3.03512	1.03129	-2.94304	Noct	nocturnin	nocturnin [Source:MGI Symbol;Acc:MGI:109382] [ENSMUST00000144826]///Mus musculus nocturnin (Noct), mRNA [NM_009834]	12457	NM_009834	ENSMUST00000144826///ENSMUST00000023849///ENSMUST00000167780
A_51_P452637,A_55_P2269497|381511	6.85157e-19	4.49292e-21	-3.94769	-1.27132	3.10519	-3.9214	-1.54738	2.53422	Pdp1	pyruvate dehyrogenase phosphatase catalytic subunit 1	Mus musculus pyruvate dehyrogenase phosphatase catalytic subunit 1 (Pdp1), transcript variant 3, mRNA [NM_001033453]///Mus musculus pyruvate dehyrogenase phosphatase catalytic subunit 1 (Pdp1), transcript variant 2, mRNA [NM_001098230]	381511	NM_001033453///NM_001098230	ENSMUST00000056050///ENSMUST00000108297
A_55_P2170834,A_55_P2718730,A_55_P2154049,A_52_P135822,A_55_P2154054,A_55_P2734632|360013	6.86675e-19	4.58165e-21	-2.75817	-1.44466	1.90922	-2.73526	-1.42919	1.91386	Myo18a	myosin XVIIIA	myosin XVIIIA [Source:MGI Symbol;Acc:MGI:2667185] [ENSMUST00000151373]///myosin XVIIIA [Source:MGI Symbol;Acc:MGI:2667185] [ENSMUST00000100443]///myosin XVIIIA [Source:MGI Symbol;Acc:MGI:2667185] [ENSMUST00000100795]///myosin XVIIIA [Source:MGI Symbol;Acc:MGI:2667185] [ENSMUST00000130627]///Mus musculus myosin XVIIIA (Myo18a), transcript variant 1, mRNA [NM_001291213]	360013	XM_017314630///XM_006533597///NM_001291213	ENSMUST00000151373///ENSMUST00000100443///ENSMUST00000100795///ENSMUST00000130627///ENSMUST00000108375///ENSMUST00000092884
A_52_P648601|75590	6.88443e-19	4.62079e-21	5.86487	1.44746	-4.05184	6.13509	1.98668	-3.08811	Dusp9	dual specificity phosphatase 9	Mus musculus dual specificity phosphatase 9 (Dusp9), mRNA [NM_029352]	75590	NM_029352	ENSMUST00000019701
A_52_P940978	7.08847e-19	4.78589e-21	3.5768	1.31041	-2.72953	3.44166	1.49982	-2.29472			mb53g10.r1 Soares mouse p3NMF19.5 Mus musculus cDNA clone IMAGE:333186 5'. [W15861]
A_55_P2727394,A_51_P185141,A_51_P406583,A_66_P112346|71602	7.13356e-19	4.85837e-21	4.112	1.35143	-3.04269	3.42189	1.2305	-2.7809	Myo1e	myosin IE	myosin IE [Source:MGI Symbol;Acc:MGI:106621] [ENSMUST00000213863]///Mus musculus myosin IE (Myo1e), mRNA [NM_181072]///Q7TQ12_RAT (Q7TQ12) Aa1114, partial (9%) [TC1617609]	71602	NM_181072	ENSMUST00000213863///ENSMUST00000214767///ENSMUST00000214042
A_51_P276943|14733	7.13356e-19	4.873e-21	2.89898	1.11271	-2.60533	2.93062	1.14738	-2.55419	Gpc1	glypican 1	Mus musculus glypican 1 (Gpc1), mRNA [NM_016696]	14733	NM_016696	ENSMUST00000045970
A_55_P2112560,A_51_P516705,A_66_P118017,A_55_P2112564,A_55_P2112569|78943	7.23763e-19	4.97283e-21	3.68962	1.40296	-2.62989	3.39299	1.24507	-2.72514	Ern1	endoplasmic reticulum (ER) to nucleus signalling 1	endoplasmic reticulum (ER) to nucleus signalling 1 [Source:MGI Symbol;Acc:MGI:1930134] [ENSMUST00000106800]///Mus musculus endoplasmic reticulum (ER) to nucleus signalling 1 (Ern1), mRNA [NM_023913]///endoplasmic reticulum (ER) to nucleus signalling 1 [Source:MGI Symbol;Acc:MGI:1930134] [ENSMUST00000001059]///endoplasmic reticulum (ER) to nucleus signalling 1 [Source:MGI Symbol;Acc:MGI:1930134] […	78943	NM_023913	ENSMUST00000106800///ENSMUST00000131895///ENSMUST00000001059///ENSMUST00000106799///ENSMUST00000106801
A_55_P2142222|546546	7.51707e-19	5.19469e-21	-5.25146	-2.11446	2.4836	-4.36944	-2.22289	1.96565	Serpina3h	serine (or cysteine) peptidase inhibitor, clade A, member 3H	Mus musculus serine (or cysteine) peptidase inhibitor, clade A, member 3H (Serpina3h), non-coding RNA [NR_033450]	546546	NR_033450	ENSMUST00000116393
A_51_P291417|21824	7.73822e-19	5.37825e-21	3.83985	-1.09638	-4.20993	3.91687	-1.41766	-5.55277	Thbd	thrombomodulin	Mus musculus thrombomodulin (Thbd), mRNA [NM_009378]	21824	NM_009378	ENSMUST00000099270
A_66_P103715|245522	8.31938e-19	5.81521e-21	-7.028	-1.7272	4.06902	-8.13046	-2.0322	4.00082	Zc4h2	zinc finger, C4H2 domain containing	Mus musculus zinc finger, C4H2 domain containing (Zc4h2), transcript variant 2, mRNA [NM_001289696]	245522	NM_001289696	ENSMUST00000044382
A_30_P01017723	8.46905e-19	5.95346e-21	7.89705	4.67577	-1.68893	7.68897	4.63902	-1.65746			lincRNA:chr17:35080914-35090009 reverse strand
A_66_P119155|72349	8.47627e-19	5.9922e-21	2.63538	1.23892	-2.12716	2.88537	1.17914	-2.44702	Dusp3	dual specificity phosphatase 3 (vaccinia virus phosphatase VH1-related)	Mus musculus dual specificity phosphatase 3 (vaccinia virus phosphatase VH1-related) (Dusp3), mRNA [NM_028207]	72349	NM_028207	ENSMUST00000107172
A_55_P2005853|67991	8.90816e-19	6.3329e-21	-3.39888	-1.09817	3.09504	-4.26237	-1.25783	3.38866	Nacc2	nucleus accumbens associated 2, BEN and BTB (POZ) domain containing	Mus musculus nucleus accumbens associated 2, BEN and BTB (POZ) domain containing (Nacc2), transcript variant 2, mRNA [NM_001037098]	67991	NM_001037098	ENSMUST00000114159
A_51_P475523,A_55_P2716984,A_66_P127735|12189	9.5577e-19	6.83262e-21	-2.92617	1.2321	3.60532	-2.8593	1.15835	3.31206	Brca1	breast cancer 1, early onset	Mus musculus breast cancer 1, early onset (Brca1), mRNA [NM_009764]///breast cancer 1, early onset [Source:MGI Symbol;Acc:MGI:104537] [ENSMUST00000156843]	12189	NM_009764	ENSMUST00000017290///ENSMUST00000156843///ENSMUST00000188168
A_51_P131561,A_52_P506995|76509	9.77103e-19	7.02393e-21	23.6176	-1.18215	-27.9196	25.9391	1.00425	-25.8293	Plet1	placenta expressed transcript 1	Mus musculus placenta expressed transcript 1 (Plet1), mRNA [NM_029639]	76509	NM_029639	ENSMUST00000114474///ENSMUST00000188047
A_55_P2087404|100732	1.01808e-18	7.35894e-21	-3.81783	-1.02304	3.73187	-3.57999	-1.07152	3.34104	Mapre3	microtubule-associated protein, RP/EB family, member 3	Mus musculus microtubule-associated protein, RP/EB family, member 3 (Mapre3), transcript variant 1, mRNA [NM_133350]	100732	NM_133350	ENSMUST00000201347
A_51_P492410,A_55_P2076533|68603	1.03424e-18	7.55789e-21	-1.30436	-2.11617	-1.62239	-1.16907	-2.18121	-1.86577	Pmvk	phosphomevalonate kinase	Mus musculus phosphomevalonate kinase (Pmvk), transcript variant 1, mRNA [NM_026784]	68603	NM_026784	ENSMUST00000184515///ENSMUST00000107410
A_30_P01021044	1.03424e-18	7.51937e-21	5.76802	1.86187	-3.09797	6.12029	1.65416	-3.69995			lincRNA:chr5:91480533-91502237 reverse strand
A_55_P2792770,A_51_P255764,A_52_P650553,A_55_P2717927,A_55_P2717932|67876	1.0475e-18	7.70634e-21	3.10587	-1.47318	-4.57551	3.1055	-1.3774	-4.27751	Coq10b	coenzyme Q10B	Mus musculus coenzyme Q10B (Coq10b), transcript variant 1, mRNA [NM_001039710]///coenzyme Q10B [Source:MGI Symbol;Acc:MGI:1915126] [ENSMUST00000185474]///coenzyme Q10B [Source:MGI Symbol;Acc:MGI:1915126] [ENSMUST00000185918]	67876	NM_001039710	ENSMUST00000087617///ENSMUST00000178708///ENSMUST00000027125///ENSMUST00000185474///ENSMUST00000185918
A_52_P499297,A_55_P2122688|56364	1.0475e-18	7.73803e-21	-5.27793	-1.26245	4.18069	-6.68752	-1.43676	4.6546	Zmym3	zinc finger, MYM-type 3	Mus musculus zinc finger, MYM-type 3 (Zmym3), transcript variant 1, mRNA [NM_019831]	56364	NM_019831	ENSMUST00000129561///ENSMUST00000120107
A_55_P2159949,A_51_P209302|64424	1.04785e-18	7.78223e-21	3.48033	1.24138	-2.8036	3.46688	1.52857	-2.26805	Polr1e	polymerase (RNA) I polypeptide E	Mus musculus polymerase (RNA) I polypeptide E (Polr1e), transcript variant 1, mRNA [NM_001285800]///Mus musculus polymerase (RNA) I polypeptide E (Polr1e), transcript variant 2, mRNA [NM_022811]	64424	NM_001285800///NM_022811	ENSMUST00000029999///ENSMUST00000153252
A_55_P2494328,A_55_P2732493|56349	1.07394e-18	8.01858e-21	-3.21115	-1.25808	2.55242	-3.41047	-1.54168	2.21218	Net1	neuroepithelial cell transforming gene 1	Mus musculus neuroepithelial cell transforming gene 1 (Net1), transcript variant 1, mRNA [NM_019671]///neuroepithelial cell transforming gene 1 [Source:MGI Symbol;Acc:MGI:1927138] [ENSMUST00000223258]	56349	NM_019671	ENSMUST00000099946///ENSMUST00000223258
A_55_P2714551,A_51_P241705,A_52_P516021|19246	1.07825e-18	8.09365e-21	2.30931	1.09603	-2.10697	2.30012	1.16709	-1.97081	Ptpn1	protein tyrosine phosphatase, non-receptor type 1	protein tyrosine phosphatase, non-receptor type 1 [Source:MGI Symbol;Acc:MGI:97805] [ENSMUST00000142717]///Mus musculus protein tyrosine phosphatase, non-receptor type 1 (Ptpn1), mRNA [NM_011201]	19246	NM_011201	ENSMUST00000142717///ENSMUST00000126839
A_52_P144263,A_55_P2727529,A_51_P145541,A_55_P2739697|56878	1.08597e-18	8.19472e-21	2.05412	1.16738	-1.7596	2.22434	1.19654	-1.85897	Rbms1	RNA binding motif, single stranded interacting protein 1	Mus musculus RNA binding motif, single stranded interacting protein 1 (Rbms1), transcript variant 3, mRNA [NM_020296]///RNA binding motif, single stranded interacting protein 1 [Source:MGI Symbol;Acc:MGI:1861774] [ENSMUST00000028347]	56878	NM_020296///XM_006499940	ENSMUST00000153555///ENSMUST00000028347///ENSMUST00000112509
A_51_P192589,A_66_P114353|66249	1.11654e-18	8.46975e-21	2.89583	1.26627	-2.2869	3.07694	1.55366	-1.98045	Pno1	partner of NOB1 homolog	Mus musculus partner of NOB1 homolog (Pno1), mRNA [NM_025443]	66249	NM_025443	ENSMUST00000020317
A_52_P574291,A_51_P148311|74277	1.11661e-18	8.51458e-21	2.0055	1.03156	-1.94415	2.16027	1.04395	-2.06931	Chic2	cysteine-rich hydrophobic domain 2	Mus musculus cysteine-rich hydrophobic domain 2 (Chic2), mRNA [NM_028850]	74277	NM_028850	ENSMUST00000075452///ENSMUST00000162397
A_66_P115323|21771	1.12247e-18	8.60385e-21	3.23694	1.25437	-2.58053	3.58594	1.63444	-2.19399	Utp4	UTP4 small subunit processome component	Mus musculus UTP4 small subunit processome component (Utp4), mRNA [NM_011574]	21771	NM_011574	ENSMUST00000212718
A_52_P161087|72128	1.1741e-18	9.04621e-21	-4.43152	-1.07632	4.11729	-5.06064	-1.30001	3.89278	2610008E11Rik	RIKEN cDNA 2610008E11 gene	Mus musculus RIKEN cDNA 2610008E11 gene (2610008E11Rik), mRNA [NM_001004362]	72128	NM_001004362	ENSMUST00000039271
A_51_P140607,A_66_P109971,A_55_P2519820|71177	1.27434e-18	9.86922e-21	2.21253	1.17686	-1.88003	2.27034	1.18776	-1.91144	Ints13	integrator complex subunit 13	Mus musculus integrator complex subunit 13 (Ints13), mRNA [NM_138757]///integrator complex subunit 13 [Source:MGI Symbol;Acc:MGI:1918427] [ENSMUST00000135277]	71177	NM_138757///XR_001785169	ENSMUST00000204234///ENSMUST00000203545///ENSMUST00000135277
A_52_P354123|69159	1.28347e-18	9.99086e-21	-2.58626	1.62621	4.20582	-2.95184	1.33762	3.94843	Rhebl1	Ras homolog enriched in brain like 1	Mus musculus Ras homolog enriched in brain like 1 (Rhebl1), mRNA [NM_026967]	69159	NM_026967	ENSMUST00000024518
A_51_P239113|22694	1.33928e-18	1.04785e-20	1.84986	1.13494	-1.62991	1.77783	1.23681	-1.43743	Zfp35	zinc finger protein 35	Mus musculus zinc finger protein 35 (Zfp35), mRNA [NM_011755]	22694	NM_011755	ENSMUST00000074941
A_55_P2738689,A_55_P2016105|74155	1.34823e-18	1.06053e-20	6.12851	1.00154	-6.11906	5.86103	-1.08415	-6.35422	Errfi1	ERBB receptor feedback inhibitor 1	ERBB receptor feedback inhibitor 1 [Source:MGI Symbol;Acc:MGI:1921405] [ENSMUST00000128640]///Mus musculus ERBB receptor feedback inhibitor 1 (Errfi1), mRNA [NM_133753]	74155	NM_133753	ENSMUST00000128640///ENSMUST00000073600
A_52_P174840,A_55_P2098911|71710	1.34823e-18	1.06556e-20	-3.97159	-1.34651	2.94955	-4.02278	-1.49699	2.68725	Lrrcc1	leucine rich repeat and coiled-coil domain containing 1	Mus musculus leucine rich repeat and coiled-coil domain containing 1 (Lrrcc1), transcript variant 3, mRNA [NM_028915]	71710	NM_028915	ENSMUST00000169799///ENSMUST00000091325
A_55_P2728810,A_55_P2035205|67949	1.35032e-18	1.07258e-20	2.22677	-1.08388	-2.41354	2.28365	-1.01061	-2.30787	Nifk	nucleolar protein interacting with the FHA domain of MKI67	Mus musculus nucleolar protein interacting with the FHA domain of MKI67 (Nifk), mRNA [NM_026472]	67949	NM_026472	ENSMUST00000161495///ENSMUST00000027626
A_52_P10732,A_55_P1958537|17760	1.35368e-18	1.08062e-20	3.16596	1.0719	-2.9536	3.20988	1.16009	-2.76694	Map6	microtubule-associated protein 6	Mus musculus microtubule-associated protein 6 (Map6), transcript variant 2, mRNA [NM_001048167]///Mus musculus microtubule-associated protein 6 (Map6), transcript variant 3, mRNA [NM_001043355]	17760	NM_001048167///NM_001043355	ENSMUST00000127492///ENSMUST00000107100
A_55_P1970017|227693	1.39514e-18	1.11926e-20	-5.4112	-1.16413	4.64829	-6.13761	-1.33814	4.58668	Zer1	zyg-11 related, cell cycle regulator	Mus musculus zyg-11 related, cell cycle regulator (Zer1), transcript variant 1, mRNA [NM_178694]	227693	NM_178694	ENSMUST00000113677
A_51_P190437|74895	1.40456e-18	1.13239e-20	-2.63899	-1.18755	2.22221	-2.61084	-1.18546	2.20238	Ccdc181	coiled-coil domain containing 181	Mus musculus coiled-coil domain containing 181 (Ccdc181), mRNA [NM_029115]	74895	NM_029115	ENSMUST00000027867
A_51_P198775,A_55_P2735250,A_55_P2149107|381306	1.43403e-18	1.16185e-20	-1.84521	1.1621	2.14431	-2.00345	1.14032	2.28458	BC055324	cDNA sequence BC055324	Mus musculus cDNA sequence BC055324 (BC055324), mRNA [NM_201364]///cDNA sequence BC055324 [Source:MGI Symbol;Acc:MGI:3590554] [ENSMUST00000097493]	381306	NM_201364///XM_006496911	ENSMUST00000045876///ENSMUST00000097493///ENSMUST00000159617
A_51_P342567|83397	1.47579e-18	1.20154e-20	4.63357	1.16804	-3.96698	5.15198	1.02098	-5.04612	Akap12	A kinase (PRKA) anchor protein (gravin) 12	Mus musculus A kinase (PRKA) anchor protein (gravin) 12 (Akap12), mRNA [NM_031185]	83397	NM_031185	ENSMUST00000045730
A_51_P461578|14149	1.47582e-18	1.20743e-20	-5.83512	-1.42256	4.10184	-6.07327	-1.46396	4.14852	Fdxr	ferredoxin reductase	Mus musculus ferredoxin reductase (Fdxr), mRNA [NM_007997]	14149	NM_007997	ENSMUST00000021078
A_55_P2875245|18572	1.48542e-18	1.22119e-20	2.61468	1.31813	-1.98362	2.35024	1.26632	-1.85596	Pdcd11	programmed cell death 11	Mus musculus programmed cell death 11 (Pdcd11), mRNA [NM_011053]	18572	NM_011053	ENSMUST00000072141
A_51_P498890|13244	1.57992e-18	1.3082e-20	2.06345	1.15136	-1.79219	2.16077	1.18879	-1.81762	Degs1	delta(4)-desaturase, sphingolipid 1	Mus musculus delta(4)-desaturase, sphingolipid 1 (Degs1), mRNA [NM_007853]	13244	NM_007853	ENSMUST00000035295
A_55_P2489139,A_55_P2713530,A_52_P398673|103268	1.57992e-18	1.31142e-20	-2.97607	1.05682	3.14517	-3.00773	-1.08774	2.76512	Cep57l1	centrosomal protein 57-like 1	Mus musculus centrosomal protein 57-like 1 (Cep57l1), transcript variant 1, mRNA [NM_029132]///Mus musculus centrosomal protein 57-like 1 (Cep57l1), transcript variant 2, mRNA [NM_026643]	103268	NM_029132///NM_026643	ENSMUST00000187143///ENSMUST00000189222
A_52_P139650|66468	1.59244e-18	1.33446e-20	-2.05188	1.07366	2.20302	-2.10933	1.10921	2.3397	Ska1	spindle and kinetochore associated complex subunit 1	Mus musculus spindle and kinetochore associated complex subunit 1 (Ska1), transcript variant 1, mRNA [NM_025581]	66468	NM_025581	ENSMUST00000040188
A_51_P237076,A_52_P268250|52468	1.59244e-18	1.33326e-20	-3.0135	-1.17922	2.5555	-3.28013	-1.24333	2.63818	Ctdsp2	CTD (carboxy-terminal domain, RNA polymerase II, polypeptide A) small phosphatase 2	Mus musculus CTD (carboxy-terminal domain, RNA polymerase II, polypeptide A) small phosphatase 2 (Ctdsp2), transcript variant b, mRNA [NM_146012]	52468	NM_146012	ENSMUST00000105256///ENSMUST00000075147
A_51_P393699,A_51_P393694|30963	1.59338e-18	1.34158e-20	2.20014	1.04344	-2.10854	2.23641	1.10409	-2.02557	Hacd1	3-hydroxyacyl-CoA dehydratase 1	Mus musculus 3-hydroxyacyl-CoA dehydratase 1 (Hacd1), transcript variant 1, mRNA [NM_013935]	30963	NM_013935	ENSMUST00000118946///ENSMUST00000114753
A_66_P121873,A_55_P2168692|12009	1.62403e-18	1.37383e-20	-4.29486	1.00621	4.32152	-4.32824	-1.05545	4.10084	Cep131	centrosomal protein 131	Mus musculus centrosomal protein 131 (Cep131), mRNA [NM_009734]	12009	NM_009734	ENSMUST00000144128///ENSMUST00000145641
A_51_P293339|22057	1.62929e-18	1.38476e-20	-3.52135	-1.93445	1.82034	-4.38281	-2.10103	2.08602	Tob1	transducer of ErbB-2.1	Mus musculus transducer of ErbB-2.1 (Tob1), mRNA [NM_009427]	22057	NM_009427	ENSMUST00000041589
A_55_P2027392|80290	1.71691e-18	1.47279e-20	-5.61249	1.08464	6.08754	-5.22484	-1.2128	4.30807	Gpr146	G protein-coupled receptor 146	Mus musculus G protein-coupled receptor 146 (Gpr146), transcript variant 1, mRNA [NM_030258]	80290	NM_030258	ENSMUST00000100514
A_55_P2805915,A_55_P2640895|231549	1.71691e-18	1.47286e-20	2.83546	1.36626	-2.07534	2.95524	1.41669	-2.08602	Lrrc8d	leucine rich repeat containing 8D	Mus musculus leucine rich repeat containing 8D (Lrrc8d), transcript variant 2, mRNA [NM_178701]///leucine rich repeat containing 8D [Source:MGI Symbol;Acc:MGI:1922368] [ENSMUST00000135776]	231549	NM_178701	ENSMUST00000120847///ENSMUST00000135776
A_52_P481957|23892	1.74806e-18	1.50653e-20	3.09671	1.32703	-2.33357	2.82028	1.25769	-2.24243	Grem1	gremlin 1, DAN family BMP antagonist	Mus musculus gremlin 1, DAN family BMP antagonist (Grem1), mRNA [NM_011824]	23892	NM_011824	ENSMUST00000099575
A_52_P604629|215418	1.74947e-18	1.51469e-20	-3.3697	-4.27277	-1.268	-3.54851	-4.37946	-1.23417	Csrnp1	cysteine-serine-rich nuclear protein 1	Mus musculus cysteine-serine-rich nuclear protein 1 (Csrnp1), mRNA [NM_153287]	215418	NM_153287	ENSMUST00000215916
A_55_P2150876,A_66_P117542|108812	1.86221e-18	1.6197e-20	5.4217	1.21176	-4.47424	5.65439	1.14375	-4.94373	Als2cr12	amyotrophic lateral sclerosis 2 (juvenile) chromosome region, candidate 12 (human)	Mus musculus amyotrophic lateral sclerosis 2 (juvenile) chromosome region, candidate 12 (human) (Als2cr12), transcript variant 3, mRNA [NM_175370]	108812	NM_175370	ENSMUST00000055313///ENSMUST00000185953
A_51_P211765|225870	1.90104e-18	1.66857e-20	4.17428	1.46666	-2.84611	4.46533	1.66727	-2.67823	Rin1	Ras and Rab interactor 1	Mus musculus Ras and Rab interactor 1 (Rin1), mRNA [NM_145495]	225870	NM_145495	ENSMUST00000025818
A_55_P1954820,A_55_P2322382|52392	1.90104e-18	1.66523e-20	2.89134	1.20533	-2.39879	2.85799	1.16406	-2.45518	D1Ertd622e	DNA segment, Chr 1, ERATO Doi 622, expressed	Mus musculus DNA segment, Chr 1, ERATO Doi 622, expressed (D1Ertd622e), mRNA [NM_133825]///DNA segment, Chr 1, ERATO Doi 622, expressed [Source:MGI Symbol;Acc:MGI:1277184] [ENSMUST00000053033]	52392	NM_133825	ENSMUST00000153115///ENSMUST00000053033
A_55_P2100705,A_51_P372473,A_55_P2100715,A_66_P108372|11992	1.92588e-18	1.69803e-20	-2.5733	-1.22254	2.10488	-2.46196	-1.35026	1.82332	Auh	AU RNA binding protein/enoyl-coenzyme A hydratase	AU RNA binding protein/enoyl-coenzyme A hydratase [Source:MGI Symbol;Acc:MGI:1338011] [ENSMUST00000120535]///Mus musculus AU RNA binding protein/enoyl-coenzyme A hydratase (Auh), mRNA [NM_016709]///AU RNA binding protein/enoyl-coenzyme A hydratase [Source:MGI Symbol;Acc:MGI:1338011] [ENSMUST00000110031]	11992	NM_016709///XM_006516846	ENSMUST00000120535///ENSMUST00000021913///ENSMUST00000110031///ENSMUST00000123599
A_66_P121463,A_55_P2181251|214239	2.0456e-18	1.81171e-20	3.13159	1.54336	-2.02907	3.06953	1.45617	-2.10795	A430105I19Rik	RIKEN cDNA A430105I19 gene	Mus musculus RIKEN cDNA A430105I19 gene (A430105I19Rik), mRNA [NM_001001982]	214239	NM_001001982	ENSMUST00000151270///ENSMUST00000059997
A_55_P2035613,A_52_P461378|69660	2.05883e-18	1.8316e-20	2.70148	-1.00961	-2.72744	2.73265	1.01047	-2.70434	Tmbim1	transmembrane BAX inhibitor motif containing 1	Mus musculus transmembrane BAX inhibitor motif containing 1 (Tmbim1), mRNA [NM_027154]	69660	NM_027154	ENSMUST00000113796
A_51_P309589|77022	2.05964e-18	1.8405e-20	-3.1267	-1.18168	2.64597	-3.66851	-1.34467	2.72819	2700099C18Rik	NDC80 homolog, kinetochore complex component pseudogene	Mus musculus RIKEN cDNA 2700099C18 gene (2700099C18Rik), non-coding RNA [NR_024720]	77022	NR_024720	ENSMUST00000182402
A_55_P2083764,A_55_P2076001|75710	2.06433e-18	1.85289e-20	2.22703	-1.04774	-2.33335	2.27144	1.00901	-2.25116	Rbm12	RNA binding motif protein 12	RNA binding motif protein 12 [Source:MGI Symbol;Acc:MGI:1922960] [ENSMUST00000109604]///Mus musculus RNA binding motif protein 12 (Rbm12), transcript variant 1, mRNA [NM_029397]	75710	NM_029397	ENSMUST00000109604///ENSMUST00000059647
A_52_P588539,A_55_P2055463|20615	2.06577e-18	1.86238e-20	-2.41602	-1.21413	1.98991	-2.46087	-1.25878	1.95497	Snapin	SNAP-associated protein	Mus musculus SNAP-associated protein (Snapin), mRNA [NM_133854]	20615	NM_133854	ENSMUST00000107351///ENSMUST00000184877
A_55_P2929799|225363	2.14279e-18	1.95735e-20	2.3593	1.09218	-2.16017	2.51065	1.18537	-2.11804	Etf1	eukaryotic translation termination factor 1	Mus musculus eukaryotic translation termination factor 1 (Etf1), mRNA [NM_144866]	225363	NM_144866	ENSMUST00000025218
A_55_P2757433|15368	2.14279e-18	1.9535e-20	2.8651	1.01237	-2.83008	3.36889	1.12729	-2.98849	Hmox1	heme oxygenase 1	Mus musculus heme oxygenase 1 (Hmox1), mRNA [NM_010442]	15368	NM_010442	ENSMUST00000005548
A_52_P460836|320974	2.14279e-18	1.95218e-20	-5.2855	-1.95972	2.69707	-5.37967	-2.47199	2.17625	Lrrn4	leucine rich repeat neuronal 4	Mus musculus leucine rich repeat neuronal 4 (Lrrn4), mRNA [NM_177303]	320974	NM_177303	ENSMUST00000049787
A_66_P112295,A_55_P2025796,A_51_P441843|208836	2.23119e-18	2.04696e-20	-3.03008	-1.19788	2.52953	-2.95615	-1.22849	2.40633	Fanci	Fanconi anemia, complementation group I	Fanconi anemia, complementation group I [Source:MGI Symbol;Acc:MGI:2384790] [ENSMUST00000137667]///Fanconi anemia, complementation group I [Source:MGI Symbol;Acc:MGI:2384790] [ENSMUST00000118959]///Mus musculus Fanconi anemia, complementation group I (Fanci), mRNA [NM_145946]	208836	NM_145946	ENSMUST00000137667///ENSMUST00000118959///ENSMUST00000036865
A_55_P2856671,A_55_P2041075,A_55_P2918958|12445	2.26932e-18	2.09116e-20	-1.75273	-1.02596	1.70839	-1.93978	1.03745	2.01242	Ccnd3	cyclin D3	cyclin D3 [Source:MGI Symbol;Acc:MGI:88315] [ENSMUST00000182281]///Mus musculus cyclin D3 (Ccnd3), transcript variant 3, mRNA [NM_001081636]	12445	NM_001081636	ENSMUST00000182281///ENSMUST00000183177///ENSMUST00000171031
A_55_P2026761	2.26932e-18	2.09997e-20	-1.35792	-2.42767	-1.78779	-1.21871	-2.57889	-2.11609			predicted gene 5873 [Source:MGI Symbol;Acc:MGI:3648385] [ENSMUST00000177157]			ENSMUST00000177157
A_55_P2095727,A_65_P16145|18854	2.32154e-18	2.15751e-20	-2.29635	1.06306	2.44116	-2.3996	1.10716	2.65673	Pml	promyelocytic leukemia	Mus musculus promyelocytic leukemia (Pml), transcript variant 2, mRNA [NM_178087]///BY764854 RIKEN full-length enriched, activated spleen Mus musculus cDNA clone F830006B16 3'. [BY764854]	18854	NM_178087	ENSMUST00000148628
A_52_P336958,A_55_P2905630|240185	2.34216e-18	2.18598e-20	2.36864	1.14529	-2.06816	2.66748	1.19725	-2.228	Jcad	junctional cadherin 5 associated	Mus musculus RIKEN cDNA 9430020K01 gene (9430020K01Rik), mRNA [NM_001081963]	240185	NM_001081963	ENSMUST00000037029
A_55_P2091681|17766	2.34279e-18	2.19587e-20	-2.633	-1.19727	2.19917	-2.64308	-1.1609	2.27674	Nudt1	nudix (nucleoside diphosphate linked moiety X)-type motif 1	Mus musculus nudix (nucleoside diphosphate linked moiety X)-type motif 1 (Nudt1), mRNA [NM_008637]	17766	NM_008637	ENSMUST00000110826
A_55_P2798611,A_52_P241484|59028	2.37186e-18	2.23254e-20	2.42273	1.1547	-2.09815	2.54843	1.16495	-2.18758	Rcl1	RNA terminal phosphate cyclase-like 1	Mus musculus RNA terminal phosphate cyclase-like 1 (Rcl1), mRNA [NM_021525]	59028	NM_021525	ENSMUST00000064393
A_55_P2729503,A_55_P2733472,A_55_P2738262,A_66_P137943,A_55_P2939900|67978	2.40934e-18	2.27739e-20	-1.93189	1.19392	2.30652	-1.90217	1.14751	2.18277	Tctn2	tectonic family member 2	Mus musculus tectonic family member 2 (Tctn2), mRNA [NM_026486]///UI-M-BZ1-bjj-b-04-0-UI.s1 NIH_BMAP_MHI2_S1 Mus musculus cDNA clone UI-M-BZ1-bjj-b-04-0-UI 3'. [BE993956]	67978	NM_026486
A_55_P2183597,A_55_P2183602|381605	2.46303e-18	2.33791e-20	4.42273	1.15561	-3.82717	4.4705	1.18951	-3.75826	Tbc1d2	TBC1 domain family, member 2	Mus musculus TBC1 domain family, member 2 (Tbc1d2), mRNA [NM_198664]///TBC1 domain family, member 2 [Source:MGI Symbol;Acc:MGI:2652885] [ENSMUST00000107750]	381605	NM_198664	ENSMUST00000084621///ENSMUST00000107750
A_55_P2731021,A_55_P2727155,A_51_P159194,A_55_P2011106|16477	2.5337e-18	2.43183e-20	-3.79105	-3.92487	-1.0353	-3.77277	-4.26601	-1.13074	Junb	jun B proto-oncogene	BC061862 jun B proto-oncogene {Rattus norvegicus} (exp=-1; wgp=0; cg=0), partial (86%) [TC1621053]///jun B proto-oncogene [Source:MGI Symbol;Acc:MGI:96647] [ENSMUST00000209372]///Mus musculus jun B proto-oncogene (Junb), mRNA [NM_008416]	16477	NM_008416	ENSMUST00000209372///ENSMUST00000064922
A_55_P2121613,A_55_P2121608|20677	2.5337e-18	2.43518e-20	2.78762	1.13801	-2.44956	2.89932	1.15729	-2.50526	Sox4	SRY (sex determining region Y)-box 4	Mus musculus SRY (sex determining region Y)-box 4 (Sox4), mRNA [NM_009238]///SRY (sex determining region Y)-box 4 [Source:MGI Symbol;Acc:MGI:98366] [ENSMUST00000067230]	20677	NM_009238	ENSMUST00000067230
A_52_P497134|320453	2.5337e-18	2.4325e-20	-6.38655	-1.97756	3.22952	-7.3803	-2.19061	3.36906	Dlx4os	distal-less homeobox 4, opposite strand	Mus musculus distal-less homeobox 4, opposite strand (Dlx4os), long non-coding RNA [NR_040279]	320453	NR_040279
A_51_P195622,A_65_P02917,A_55_P2733392,A_52_P358349,A_51_P158822,A_55_P2718949|67154	2.59564e-18	2.50503e-20	1.80878	1.04064	-1.73813	1.87074	1.04527	-1.78971	Mtdh	metadherin	PREDICTED: Mus musculus metadherin (Mtdh), transcript variant X1, mRNA [XM_006520148]///Mus musculus metadherin (Mtdh), mRNA [NM_026002]///metadherin [Source:MGI Symbol;Acc:MGI:1914404] [ENSMUST00000172082]	67154	XM_006520148///NM_026002	ENSMUST00000172083///ENSMUST00000172082///ENSMUST00000163333///ENSMUST00000168991
A_55_P2040168,A_55_P2503961|18858	2.59908e-18	2.51867e-20	-3.51435	-1.6107	2.18187	-3.56757	-1.66146	2.14725	Pmp22	peripheral myelin protein 22	Mus musculus peripheral myelin protein 22 (Pmp22), transcript variant 5, mRNA [NM_001302260]	18858	NM_001302260	ENSMUST00000108701///ENSMUST00000108702
A_66_P103727,A_55_P2102936|108767	2.73532e-18	2.66156e-20	-9.36469	-1.68499	5.55772	-9.50057	-1.94072	4.89538	Pnrc1	proline-rich nuclear receptor coactivator 1	BB208578 RIKEN full-length enriched, 0 day neonate thymus Mus musculus cDNA clone A430088L20 3'. [BB208578]///Mus musculus proline-rich nuclear receptor coactivator 1 (Pnrc1), mRNA [NM_001033225]	108767	NM_001033225	ENSMUST00000049357
A_66_P119298,A_66_P110109|272538	2.77989e-18	2.71597e-20	-2.46576	-1.04763	2.35366	-2.74045	-1.09808	2.49566	Tango6	transport and golgi organization 6	Mus musculus transport and golgi organization 6 (Tango6), mRNA [NM_173037]	272538	NM_173037	ENSMUST00000048359///ENSMUST00000212764
A_52_P561020,A_55_P2425235,A_66_P134650|69906	2.92621e-18	2.87054e-20	3.49737	1.34401	-2.6022	3.75612	1.36312	-2.75552	Slc25a32	solute carrier family 25, member 32	Mus musculus solute carrier family 25, member 32 (Slc25a32), mRNA [NM_172402]///PREDICTED: Mus musculus solute carrier family 25, member 32 (Slc25a32), transcript variant X1, mRNA [XM_006521385]	69906	NM_172402///XM_006521385	ENSMUST00000022908
A_55_P2081283|13394	2.93761e-18	2.89339e-20	-2.88031	-1.39687	2.06198	-2.90524	-1.45973	1.99026	Dlx4	distal-less homeobox 4	Mus musculus distal-less homeobox 4 (Dlx4), mRNA [NM_007867]	13394	NM_007867	ENSMUST00000021241
A_52_P597775|232431	2.95674e-18	2.92397e-20	5.77546	1.05843	-5.45665	6.08973	1.13954	-5.34404	Gprc5a	G protein-coupled receptor, family C, group 5, member A	Mus musculus G protein-coupled receptor, family C, group 5, member A (Gprc5a), mRNA [NM_181444]	232431	NM_181444	ENSMUST00000050104
A_51_P138830|226123	2.96966e-18	2.95165e-20	-2.45445	-1.05193	2.33327	-2.83725	-1.03873	2.73145	Morn4	MORN repeat containing 4	Mus musculus MORN repeat containing 4 (Morn4), mRNA [NM_198108]	226123	NM_198108	ENSMUST00000051772
A_66_P109431,A_51_P219918|230678	2.96966e-18	2.96035e-20	1.81032	-1.62353	-2.9391	1.91201	-1.56016	-2.98304	Tmem125	transmembrane protein 125	Mus musculus transmembrane protein 125 (Tmem125), mRNA [NM_172383]	230678	NM_172383	ENSMUST00000060214
A_52_P257026	2.98988e-18	2.99237e-20	-12.1528	-6.57033	1.84965	-14.4689	-9.0165	1.60471			GB
A_65_P15456,A_52_P432969|279653	3.16176e-18	3.17711e-20	3.48364	-1.19828	-4.17439	3.38974	-1.19102	-4.03726	Pcdh19	protocadherin 19	Mus musculus protocadherin 19 (Pcdh19), transcript variant 1, mRNA [NM_001105245]	279653	NM_001105245	ENSMUST00000060309
A_55_P1979217,A_51_P267671|80283	3.16176e-18	3.18952e-20	-4.69987	-1.06674	4.40582	-4.2044	-1.10121	3.81798	Abtb1	ankyrin repeat and BTB (POZ) domain containing 1	Mus musculus ankyrin repeat and BTB (POZ) domain containing 1 (Abtb1), mRNA [NM_030251]	80283	NM_030251	ENSMUST00000032169///ENSMUST00000204560
A_66_P106355,A_51_P118539|76967	3.25683e-18	3.29835e-20	-3.48994	-1.10118	3.16928	-3.89968	-1.22916	3.17263	2700049A03Rik	RIKEN cDNA 2700049A03 gene	Mus musculus RIKEN cDNA 2700049A03 gene (2700049A03Rik), transcript variant 2, mRNA [NM_029818]///Mus musculus RIKEN cDNA 2700049A03 gene (2700049A03Rik), transcript variant 1, mRNA [NM_001163378]	76967	NM_029818///NM_001163378	ENSMUST00000134748///ENSMUST00000149564
A_55_P1980951|68618	3.42603e-18	3.49692e-20	-2.7734	-1.40172	1.97857	-3.099	-1.40424	2.20689	1110012L19Rik	RIKEN cDNA 1110012L19 gene	Mus musculus RIKEN cDNA 1110012L19 gene (1110012L19Rik), mRNA [NM_026787]	68618	NM_026787	ENSMUST00000053981
A_66_P136099,A_55_P2500113|71743	3.42603e-18	3.49301e-20	-1.86223	1.13065	2.10554	-1.98509	1.14965	2.28217	Coasy	Coenzyme A synthase	Mus musculus Coenzyme A synthase (Coasy), mRNA [NM_001305982]	71743	NM_001305982	ENSMUST00000107308///ENSMUST00000151686
A_55_P2798059,A_51_P190281|18393	3.5455e-18	3.63294e-20	2.21599	1.0807	-2.05052	2.29062	1.2648	-1.81105	Orc2	origin recognition complex, subunit 2	Mus musculus origin recognition complex, subunit 2 (Orc2), transcript variant a, mRNA [NM_008765]	18393	NM_008765	ENSMUST00000151723///ENSMUST00000027198
A_51_P425680,A_66_P105102,A_65_P11840|56357	3.55781e-18	3.68868e-20	-2.85818	-1.36754	2.09002	-3.04082	-1.36619	2.22577	Ivd	isovaleryl coenzyme A dehydrogenase	Mus musculus isovaleryl coenzyme A dehydrogenase (Ivd), mRNA [NM_019826]///isovaleryl coenzyme A dehydrogenase [Source:MGI Symbol;Acc:MGI:1929242] [ENSMUST00000028807]	56357	NM_019826///XM_006499925	ENSMUST00000028807///ENSMUST00000154104
A_51_P440892|67728	3.55781e-18	3.67299e-20	3.3965	1.12577	-3.01703	3.19691	1.1807	-2.70765	Dph2	DPH2 homolog	Mus musculus DPH2 homolog (Dph2), mRNA [NM_026344]	67728	NM_026344	ENSMUST00000139332
A_51_P492765,A_55_P2899105,A_66_P129790|73674	3.55781e-18	3.68233e-20	2.33234	1.26637	-1.84175	2.33616	1.41779	-1.64774	Wdr75	WD repeat domain 75	Mus musculus WD repeat domain 75 (Wdr75), mRNA [NM_028599]	73674	NM_028599	ENSMUST00000186308///ENSMUST00000147308///ENSMUST00000154436
A_55_P2046245|15205	3.55781e-18	3.70207e-20	-6.82333	-16.0218	-2.3481	-8.80991	-16.7369	-1.89978	Hes1	hairy and enhancer of split 1 (Drosophila)	Mus musculus hairy and enhancer of split 1 (Drosophila) (Hes1), mRNA [NM_008235]	15205	NM_008235	ENSMUST00000023171
A_51_P494361,A_55_P2738082|105559	3.61518e-18	3.79049e-20	2.38102	1.19115	-1.99892	2.42552	1.11554	-2.1743	Mbnl2	muscleblind like splicing factor 2	Mus musculus muscleblind-like 2 (Mbnl2), transcript variant 1, mRNA [NM_175341]	105559	NM_175341	ENSMUST00000088419
A_51_P195958|21664	3.61518e-18	3.79032e-20	1.58464	-1.77458	-2.81208	1.72746	-1.67425	-2.8922	Phlda1	pleckstrin homology like domain, family A, member 1	Mus musculus pleckstrin homology like domain, family A, member 1 (Phlda1), mRNA [NM_009344]	21664	NM_009344	ENSMUST00000164773
A_51_P479808,A_55_P2635640,A_55_P1983638|50772	3.94041e-18	4.14714e-20	2.59045	1.03179	-2.51062	2.6929	1.15219	-2.33719	Mapk6	mitogen-activated protein kinase 6	Mus musculus mitogen-activated protein kinase 6 (Mapk6), transcript variant 2, mRNA [NM_027418]///mitogen-activated protein kinase 6 [Source:MGI Symbol;Acc:MGI:1354946] [ENSMUST00000172946]	50772	NM_027418	ENSMUST00000049355///ENSMUST00000172946
A_51_P518163|27966	4.13356e-18	4.39968e-20	3.83888	1.17945	-3.2548	4.06607	1.46202	-2.78113	Rrp9	RRP9, small subunit (SSU) processome component, homolog (yeast)	Mus musculus RRP9, small subunit (SSU) processome component, homolog (yeast) (Rrp9), mRNA [NM_145620]	27966	NM_145620	ENSMUST00000125630
A_51_P308796|14283	4.13356e-18	4.39092e-20	7.60929	1.66509	-4.56989	7.7112	1.69986	-4.53639	Fosl1	fos-like antigen 1	Mus musculus fos-like antigen 1 (Fosl1), mRNA [NM_010235]	14283	NM_010235	ENSMUST00000025850
A_51_P284823,A_55_P2068306|20017	4.13356e-18	4.38167e-20	3.08195	1.07419	-2.86908	2.92936	1.15288	-2.5409	Polr1b	polymerase (RNA) I polypeptide B	Mus musculus polymerase (RNA) I polypeptide B (Polr1b), mRNA [NM_009086]///polymerase (RNA) I polypeptide B [Source:MGI Symbol;Acc:MGI:108014] [ENSMUST00000028874]	20017	NM_009086	ENSMUST00000103205///ENSMUST00000028874
A_52_P93354,A_55_P2715701,A_55_P2133652,A_55_P2133646|382090	4.20277e-18	4.49003e-20	-2.15854	1.01181	2.18404	-2.01508	-1.0384	1.94056	Cep162	centrosomal protein 162	Mus musculus centrosomal protein 162 (Cep162), mRNA [NM_199316]///centrosomal protein 162 [Source:MGI Symbol;Acc:MGI:1925343] [ENSMUST00000188289]	382090	NM_199316	ENSMUST00000144137///ENSMUST00000188289///ENSMUST00000093802///ENSMUST00000139301
A_52_P188423,A_55_P1959465,A_55_P1959470,A_52_P545810,A_55_P2731011|16978	4.26914e-18	4.57789e-20	2.4768	1.16078	-2.13373	2.66883	1.07906	-2.4733	Lrrfip1	leucine rich repeat (in FLII) interacting protein 1	Mus musculus leucine rich repeat (in FLII) interacting protein 1 (Lrrfip1), transcript variant 2, mRNA [NM_008515]///Mus musculus leucine rich repeat (in FLII) interacting protein 1 (Lrrfip1), transcript variant 4, mRNA [NM_001310732]///Mus musculus leucine rich repeat (in FLII) interacting protein 1 (Lrrfip1), transcript variant 1, mRNA [NM_001111311]///Mus musculus leucine rich repeat (in FLII)…	16978	NM_008515///NM_001310732///NM_001111311///NM_001111312	ENSMUST00000185531///ENSMUST00000097650///ENSMUST00000097649///ENSMUST00000189505
A_51_P140641,A_55_P2718178|232146	4.26942e-18	4.6028e-20	9.33237	1.18294	-7.88914	12.4688	1.75843	-7.09086	Eva1a	eva-1 homolog A (C. elegans)	Mus musculus eva-1 homolog A (C. elegans) (Eva1a), mRNA [NM_145570]///eva-1 homolog A (C. elegans) [Source:MGI Symbol;Acc:MGI:2385247] [ENSMUST00000150691]	232146	NM_145570	ENSMUST00000042974///ENSMUST00000150691
A_66_P123888,A_51_P274259|229949	4.26942e-18	4.6121e-20	-3.73097	-1.60695	2.32178	-3.43954	-1.75871	1.95572	Ak5	adenylate kinase 5	Mus musculus adenylate kinase 5 (Ak5), mRNA [NM_001081277]	229949	NM_001081277	ENSMUST00000045262
A_55_P2739288,A_55_P2602267,A_51_P211526|68964	4.33139e-18	4.69795e-20	-3.16373	-1.04737	3.02065	-3.34441	-1.16043	2.88203	Ctc1	CTS telomere maintenance complex component 1	Mus musculus CTS telomere maintenance complex component 1 (Ctc1), transcript variant 1, mRNA [NM_001013256]///CTS telomere maintenance complex component 1 [Source:MGI Symbol;Acc:MGI:1916214] [ENSMUST00000135611]	68964	NM_001013256	ENSMUST00000154126///ENSMUST00000135611///ENSMUST00000161455
A_51_P254855|19225	4.33139e-18	4.71345e-20	1.35885	-2.8247	-3.83836	1.40365	-3.35792	-4.71335	Ptgs2	prostaglandin-endoperoxide synthase 2	Mus musculus prostaglandin-endoperoxide synthase 2 (Ptgs2), mRNA [NM_011198]	19225	NM_011198	ENSMUST00000035065
A_51_P439857,A_55_P2007165,A_55_P2490559,A_55_P2733012|78244	4.5368e-18	4.955e-20	1.80469	1.02536	-1.76005	1.84047	1.07117	-1.71818	Dnajc21	DnaJ heat shock protein family (Hsp40) member C21	Mus musculus DnaJ heat shock protein family (Hsp40) member C21 (Dnajc21), mRNA [NM_030046]///DnaJ heat shock protein family (Hsp40) member C21 [Source:MGI Symbol;Acc:MGI:1925371] [ENSMUST00000147224]	78244	NM_030046	ENSMUST00000150878///ENSMUST00000147224///ENSMUST00000146323///ENSMUST00000145719
A_51_P293087|17385	4.56601e-18	5.00504e-20	-2.81086	-1.02099	2.75308	-3.00514	-1.19051	2.52426	Mmp11	matrix metallopeptidase 11	Mus musculus matrix metallopeptidase 11 (Mmp11), transcript variant 1, mRNA [NM_008606]	17385	NM_008606	ENSMUST00000152222
A_52_P406819,A_51_P302139,A_51_P235775,A_52_P996341|67121	4.68187e-18	5.15063e-20	-2.6464	1.01469	2.68529	-2.98902	-1.06259	2.81296	Mastl	microtubule associated serine/threonine kinase-like	microtubule associated serine/threonine kinase-like [Source:MGI Symbol;Acc:MGI:1914371] [ENSMUST00000028119]///Mus musculus microtubule associated serine/threonine kinase-like (Mastl), mRNA [NM_025979]	67121	NM_025979	ENSMUST00000028119///ENSMUST00000136207
A_52_P39247,A_65_P17148,A_51_P216605|73389	4.71813e-18	5.228e-20	-6.0427	-1.20871	4.9993	-6.16588	-1.50611	4.09392	Hbp1	high mobility group box transcription factor 1	Mus musculus high mobility group box transcription factor 1 (Hbp1), transcript variant 1, mRNA [NM_153198]///high mobility group box transcription factor 1 [Source:MGI Symbol;Acc:MGI:894659] [ENSMUST00000176103]///Mus musculus high mobility group box transcription factor 1 (Hbp1), transcript variant 2, mRNA [NM_177993]	73389	NM_153198///NM_177993	ENSMUST00000172314///ENSMUST00000176103///ENSMUST00000167458
A_66_P118365,A_55_P2628542,A_55_P2483108|66863	4.71813e-18	5.21033e-20	-1.58792	-1.015	1.56444	-1.71366	-1.0338	1.65763	Lztr1	leucine-zipper-like transcriptional regulator, 1	Mus musculus leucine-zipper-like transcriptional regulator, 1 (Lztr1), transcript variant 3, mRNA [NM_001331227]	66863	NM_001331227	ENSMUST00000134618///ENSMUST00000142259///ENSMUST00000142393
A_66_P123040,A_51_P155313|14873	4.80007e-18	5.33786e-20	2.17916	1.1532	-1.88966	2.38392	1.37521	-1.73349	Gsto1	glutathione S-transferase omega 1	Mus musculus glutathione S-transferase omega 1 (Gsto1), mRNA [NM_010362]	14873	NM_010362	ENSMUST00000143694///ENSMUST00000026050
A_55_P2068137	4.83294e-18	5.3936e-20	-2.70663	-1.30629	2.072	-3.09567	-1.38298	2.23841
A_55_P1975690,A_51_P146633|83675	4.91668e-18	5.50659e-20	-3.19739	-1.85575	1.72296	-2.98439	-2.21155	1.34946	Bicc1	BicC family RNA binding protein 1	Mus musculus BicC family RNA binding protein 1 (Bicc1), transcript variant 2, mRNA [NM_001347189]	83675	NM_001347189	ENSMUST00000014473///ENSMUST00000143791
A_55_P2821885,A_55_P2492434|380928	4.9585e-18	5.57312e-20	-4.10127	-1.0098	4.06146	-4.98656	-1.12318	4.43968	Lmo7	LIM domain only 7	LIM domain only 7 [Source:MGI Symbol;Acc:MGI:1353586] [ENSMUST00000159154]///Mus musculus LIM domain only 7 (Lmo7), transcript variant 1, mRNA [NM_201529]	380928	NM_201529	ENSMUST00000159154///ENSMUST00000159314
A_52_P249937,A_66_P123803,A_52_P355084|210029	5.03772e-18	5.73248e-20	3.69607	1.40402	-2.6325	3.86588	1.23388	-3.1331	Metrnl	meteorin, glial cell differentiation regulator-like	Mus musculus meteorin, glial cell differentiation regulator-like (Metrnl), mRNA [NM_144797]	210029	NM_144797	ENSMUST00000125580///ENSMUST00000106089
A_55_P2077263,A_55_P2106150,A_55_P2933430|60411	5.03772e-18	5.72792e-20	-2.8608	-1.00728	2.84013	-3.08534	-1.0806	2.85522	Cenpk	centromere protein K	Mus musculus centromere protein K (Cenpk), transcript variant 1, mRNA [NM_021790]	60411	NM_021790	ENSMUST00000022227
A_51_P219385|20475	5.03772e-18	5.74219e-20	-4.7413	-1.24647	3.80378	-5.34246	-1.41427	3.77753	Six5	sine oculis-related homeobox 5	Mus musculus sine oculis-related homeobox 5 (Six5), mRNA [NM_011383]	20475	NM_011383	ENSMUST00000049454
A_51_P100327,A_66_P125929|21354	5.03772e-18	5.73265e-20	-6.80485	-1.55827	4.36692	-8.42713	-1.78765	4.71407	Tap1	transporter 1, ATP-binding cassette, sub-family B (MDR/TAP)	Mus musculus transporter 1, ATP-binding cassette, sub-family B (MDR/TAP) (Tap1), transcript variant 1, mRNA [NM_013683]	21354	NM_013683	ENSMUST00000166582///ENSMUST00000041633
A_55_P2735639,A_55_P1975732,A_55_P2713615,A_66_P103757,A_55_P2713611|74206	5.05236e-18	5.77953e-20	3.03108	1.4635	-2.07111	3.21214	1.64606	-1.95141	Sipa1l3	signal-induced proliferation-associated 1 like 3	signal-induced proliferation-associated 1 like 3 [Source:MGI Symbol;Acc:MGI:1921456] [ENSMUST00000182829]///Mus musculus signal-induced proliferation-associated 1 like 3 (Sipa1l3), mRNA [NM_001081028]///signal-induced proliferation-associated 1 like 3 [Source:MGI Symbol;Acc:MGI:1921456] [ENSMUST00000182911]	74206	NM_001081028	ENSMUST00000182829///ENSMUST00000085809///ENSMUST00000182911///ENSMUST00000182011
A_55_P2910252,A_52_P114810|20585	5.05236e-18	5.79901e-20	-2.19348	-1.01906	2.15246	-2.27859	-1.14683	1.98686	Hltf	helicase-like transcription factor	Mus musculus helicase-like transcription factor (Hltf), transcript variant 1, mRNA [NM_009210]	20585	NM_009210	ENSMUST00000145853///ENSMUST00000128127
A_51_P359272,A_55_P2914546|11658	5.27849e-18	6.10049e-20	3.51225	1.21008	-2.90249	3.28532	1.13931	-2.8836	Alcam	activated leukocyte cell adhesion molecule	Mus musculus activated leukocyte cell adhesion molecule (Alcam), transcript variant 1, mRNA [NM_009655]	11658	NM_009655	ENSMUST00000164888///ENSMUST00000023312
A_66_P101068,A_51_P472217|72080	5.27849e-18	6.09589e-20	-2.55638	-1.08242	2.36172	-2.85214	-1.08555	2.62738	Sapcd2	suppressor APC domain containing 2	Mus musculus suppressor APC domain containing 2 (Sapcd2), transcript variant 1, mRNA [NM_001081085]	72080	NM_001081085	ENSMUST00000132539///ENSMUST00000129214
A_55_P2058783|69573	5.28112e-18	6.1245e-20	3.50193	1.07341	-3.26243	3.68547	1.02572	-3.59306	Hilpda	hypoxia inducible lipid droplet associated	Mus musculus hypoxia inducible lipid droplet associated (Hilpda), transcript variant 2, mRNA [NM_023516]	69573	NM_023516	ENSMUST00000115289
A_51_P258078|110109	5.41784e-18	6.32609e-20	3.16297	1.28876	-2.45427	3.26243	1.50564	-2.16681	Nop2	NOP2 nucleolar protein	Mus musculus NOP2 nucleolar protein (Nop2), mRNA [NM_138747]	110109	NM_138747	ENSMUST00000044200
A_55_P1957850,A_52_P131418,A_65_P14617|66616	5.41784e-18	6.30968e-20	2.10041	1.52496	-1.37736	2.03654	1.47944	-1.37656	Snx9	sorting nexin 9	Mus musculus sorting nexin 9 (Snx9), mRNA [NM_025664]///PREDICTED: Mus musculus sorting nexin 9 (Snx9), transcript variant X1, mRNA [XM_017317612]///sorting nexin 9 [Source:MGI Symbol;Acc:MGI:1913866] [ENSMUST00000002436]	66616	NM_025664///XM_017317612	ENSMUST00000002436
A_55_P1964960,A_55_P2614900|77125	5.43281e-18	6.36515e-20	3.81608	1.29641	-2.94357	4.13413	1.18613	-3.48539	Il33	interleukin 33	Mus musculus interleukin 33 (Il33), transcript variant 1, mRNA [NM_001164724]	77125	NM_001164724	ENSMUST00000120388///ENSMUST00000144528
A_55_P2824234|109212	5.4389e-18	6.41539e-20	-2.21536	-1.29363	1.71251	-2.28403	-1.22467	1.86502	Pimreg	PICALM interacting mitotic regulator	Mus musculus family with sequence similarity 64, member A (Fam64a), mRNA [NM_144526]	109212	NM_144526	ENSMUST00000021164
A_65_P04014,A_51_P169920|57741	5.4389e-18	6.41548e-20	2.54711	1.43928	-1.76971	2.60902	1.48642	-1.75523	Noc2l	NOC2 like nucleolar associated transcriptional repressor	NOC2L_MOUSE (Q9WV70) Nucleolar complex protein 2 homolog (NOC2 protein homolog), partial (29%) [TC1616984]///Mus musculus nucleolar complex associated 2 homolog (S. cerevisiae) (Noc2l), mRNA [NM_021303]	57741	NM_021303	ENSMUST00000179886
A_55_P2798734|68904	5.68141e-18	6.7241e-20	2.6424	1.39685	-1.89168	2.70593	1.37587	-1.96671	Abhd13	abhydrolase domain containing 13	Mus musculus abhydrolase domain containing 13 (Abhd13), transcript variant 1, mRNA [NM_026868]	68904	NM_026868	ENSMUST00000139793
A_52_P622434|28126	5.68914e-18	6.75584e-20	2.59341	1.19925	-2.16253	2.50274	1.2972	-1.92934	Nop16	NOP16 nucleolar protein	Mus musculus NOP16 nucleolar protein (Nop16), mRNA [NM_178605]	28126	NM_178605	ENSMUST00000149462
A_52_P627327,A_55_P1987605|260315	5.7066e-18	6.79923e-20	4.50086	1.3258	-3.39482	4.93782	1.28554	-3.84105	Nav3	neuron navigator 3	neuron navigator 3 [Source:MGI Symbol;Acc:MGI:2183703] [ENSMUST00000161582]///Mus musculus neuron navigator 3 (Nav3), mRNA [NM_001081035]	260315	XM_017313946///NM_001081035	ENSMUST00000161582
A_51_P500344,A_55_P2737457,A_52_P558713|232087	5.72327e-18	6.85517e-20	2.91641	1.16407	-2.50536	3.03456	1.26996	-2.38949	Mat2a	methionine adenosyltransferase II, alpha	Mus musculus methionine adenosyltransferase II, alpha (Mat2a), mRNA [NM_145569]///methionine adenosyltransferase II, alpha [Source:MGI Symbol;Acc:MGI:2443731] [ENSMUST00000205710]	232087	NM_145569	ENSMUST00000205622///ENSMUST00000205335///ENSMUST00000205710
A_51_P488991|102644	5.72327e-18	6.86456e-20	5.05524	1.13967	-4.4357	4.8851	1.08912	-4.48538	Oaf	out at first homolog	Mus musculus out at first homolog (Oaf), mRNA [NM_178644]	102644	NM_178644	ENSMUST00000034512
A_52_P399646,A_55_P2630691,A_55_P2117689,A_55_P2630706,A_55_P2717409|66084	5.82242e-18	7.00661e-20	-2.23112	1.1774	2.62691	-2.30632	1.10481	2.54803	Rmnd1	required for meiotic nuclear division 1 homolog	Mus musculus required for meiotic nuclear division 1 homolog (Rmnd1), mRNA [NM_025343]///required for meiotic nuclear division 1 homolog [Source:MGI Symbol;Acc:MGI:1913334] [ENSMUST00000156940]///required for meiotic nuclear division 1 homolog [Source:MGI Symbol;Acc:MGI:1913334] [ENSMUST00000148566]	66084	NM_025343	ENSMUST00000137429///ENSMUST00000156940///ENSMUST00000140660///ENSMUST00000131853///ENSMUST00000148566
A_55_P2030756,A_55_P2730451,A_66_P133816,A_55_P2741444|83814	5.84982e-18	7.06919e-20	2.61173	1.04138	-2.50794	2.78206	1.06403	-2.61463	Nedd4l	neural precursor cell expressed, developmentally down-regulated gene 4-like	Mus musculus neural precursor cell expressed, developmentally down-regulated gene 4-like (Nedd4l), transcript variant 2, mRNA [NM_031881]///NED4L_MOUSE (Q8CFI0) E3 ubiquitin-protein ligase NEDD4-like protein (Nedd4-2) (NEDD4.2) , partial (13%) [TC1595072]///AV377264 RIKEN full-length enriched, adult male cecum Mus musculus cDNA clone 9130225F20 3'. [AV377264]	83814	NM_031881	ENSMUST00000080418
A_51_P182296,A_55_P2169149,A_55_P2638505|67282	5.84982e-18	7.10928e-20	-2.07016	-1.24054	1.66876	-2.12276	-1.27774	1.66135	Washc3	WASH complex subunit 3	Mus musculus WASH complex subunit 3 (Washc3), transcript variant 1, mRNA [NM_026070]///Mus musculus WASH complex subunit 3 (Washc3), transcript variant 3, mRNA [NM_027487]	67282	NM_026070///NM_027487	ENSMUST00000182183///ENSMUST00000182619///ENSMUST00000182299
A_51_P245789|76477	5.84982e-18	7.09787e-20	5.84045	1.35794	-4.30096	5.48138	1.37331	-3.99136	Pcolce2	procollagen C-endopeptidase enhancer 2	Mus musculus procollagen C-endopeptidase enhancer 2 (Pcolce2), mRNA [NM_029620]	76477	NM_029620	ENSMUST00000015498
A_51_P383399|26358	5.96035e-18	7.26728e-20	-2.23527	-2.50365	-1.12007	-2.18722	-2.86976	-1.31206	Aldh1a7	aldehyde dehydrogenase family 1, subfamily A7	Mus musculus aldehyde dehydrogenase family 1, subfamily A7 (Aldh1a7), mRNA [NM_011921]	26358	NM_011921	ENSMUST00000025656
A_51_P441837|68777	5.9778e-18	7.33505e-20	-7.81331	-2.10025	3.72018	-6.52607	-2.18621	2.9851	Tmem53	transmembrane protein 53	Mus musculus transmembrane protein 53 (Tmem53), transcript variant 2, mRNA [NM_026837]	68777	NM_026837	ENSMUST00000062824
A_52_P551887,A_51_P431558|13046	5.9778e-18	7.33604e-20	2.00779	1.17942	-1.70236	2.17442	1.21356	-1.79177	Celf1	CUGBP, Elav-like family member 1	Mus musculus CUGBP, Elav-like family member 1 (Celf1), transcript variant 1, mRNA [NM_017368]///Mus musculus CUGBP, Elav-like family member 1 (Celf1), transcript variant 3, mRNA [NM_001244891]	13046	NM_017368///NM_001244891	ENSMUST00000127385///ENSMUST00000177642
A_55_P2494623,A_51_P462364|14299	6.00993e-18	7.39934e-20	3.68012	1.2313	-2.98881	3.91619	1.44294	-2.71404	Ncs1	neuronal calcium sensor 1	Mus musculus neuronal calcium sensor 1 (Ncs1), mRNA [NM_019681]	14299	NM_019681	ENSMUST00000000199///ENSMUST00000150670
A_52_P518808	6.09105e-18	7.5234e-20	4.08615	1.13892	-3.58774	3.74372	1.30432	-2.87024			predicted gene 45716 [Source:MGI Symbol;Acc:MGI:5804831] [ENSMUST00000134929]		XM_011249187	ENSMUST00000134929
A_55_P2029051,A_52_P19532|30938	6.19602e-18	7.67766e-20	2.98508	-1.04205	-3.11061	3.30158	-1.07453	-3.54766	Fgd3	FYVE, RhoGEF and PH domain containing 3	FYVE, RhoGEF and PH domain containing 3 [Source:MGI Symbol;Acc:MGI:1353657] [ENSMUST00000110087]///Mus musculus FYVE, RhoGEF and PH domain containing 3 (Fgd3), mRNA [NM_015759]	30938	NM_015759	ENSMUST00000110087///ENSMUST00000110086
A_51_P477833|242785	6.3647e-18	7.91196e-20	4.17586	1.45931	-2.86152	4.30441	1.53601	-2.80234	Klhl21	kelch-like 21	Mus musculus kelch-like 21 (Klhl21), mRNA [NM_001033352]	242785	NM_001033352	ENSMUST00000097773
A_55_P2742396	6.43142e-18	8.02044e-20	3.85801	2.05199	-1.88013	3.73749	1.89888	-1.96827			ia218b01.x1 mouse taste receptor cell, subtracted, normalized Mus musculus cDNA clone ia218b01 3', mRNA sequence [EH102231]
A_55_P2483417|67088	6.43761e-18	8.05372e-20	-2.29686	-1.09433	2.09888	-2.63733	-1.1224	2.34973	Cand2	cullin-associated and neddylation-dissociated 2 (putative)	Mus musculus cullin-associated and neddylation-dissociated 2 (putative) (Cand2), mRNA [NM_025958]	67088	NM_025958	ENSMUST00000075995
A_52_P142390|212153	6.44156e-18	8.08425e-20	-3.06665	1.04974	3.21918	-3.30945	-1.06606	3.10437	Ccdc191	coiled-coil domain containing 191	Mus musculus coiled-coil domain containing 191 (Ccdc191), mRNA [NM_027801]	212153	NM_027801	ENSMUST00000132859
A_51_P368591|114606	6.47921e-18	8.15723e-20	-3.70254	-1.04265	3.55109	-3.48066	-1.04231	3.33937	Tle6	transducin-like enhancer of split 6	Mus musculus transducin-like enhancer of split 6 (Tle6), transcript variant 1, mRNA [NM_053254]	114606	NM_053254	ENSMUST00000137631
A_51_P143103,A_55_P2718861,A_55_P2731081|226169	6.58343e-18	8.31459e-20	2.63216	1.45366	-1.8107	2.56727	1.52225	-1.6865	Pprc1	peroxisome proliferative activated receptor, gamma, coactivator-related 1	Mus musculus peroxisome proliferative activated receptor, gamma, coactivator-related 1 (Pprc1), transcript variant 2, mRNA [NM_001346801]///peroxisome proliferative activated receptor, gamma, coactivator-related 1 [Source:MGI Symbol;Acc:MGI:2385096] [ENSMUST00000134015]///Mus musculus peroxisome proliferative activated receptor, gamma, coactivator-related 1 (Pprc1), transcript variant 1, mRNA [NM…	226169	NM_001346801///NM_001081214	ENSMUST00000153111///ENSMUST00000134015///ENSMUST00000099392
A_66_P122453,A_52_P605812|329384	6.68069e-18	8.4905e-20	4.87223	1.49225	-3.26503	5.07681	1.80014	-2.82024	Ptrh1	peptidyl-tRNA hydrolase 1 homolog	Mus musculus peptidyl-tRNA hydrolase 1 homolog (Ptrh1), mRNA [NM_178595]	329384	NM_178595	ENSMUST00000066352
A_51_P144648,A_52_P319123|666173	6.68069e-18	8.46977e-20	-3.7759	-1.21486	3.1081	-3.77699	-1.50901	2.50295	Vps13b	vacuolar protein sorting 13B	Mus musculus vacuolar protein sorting 13B (Vps13b), mRNA [NM_177151]	666173	NM_177151	ENSMUST00000048646
A_51_P304125|13340	6.73841e-18	8.59061e-20	4.99364	1.53934	-3.24401	5.27117	1.72935	-3.04806	Slc29a2	solute carrier family 29 (nucleoside transporters), member 2	Mus musculus solute carrier family 29 (nucleoside transporters), member 2 (Slc29a2), mRNA [NM_007854]	13340	NM_007854	ENSMUST00000025826
A_51_P181565,A_55_P2731956|15200	6.89596e-18	8.84624e-20	3.70021	-2.15539	-7.97538	3.36612	-2.43141	-8.18441	Hbegf	heparin-binding EGF-like growth factor	Mus musculus heparin-binding EGF-like growth factor (Hbegf), mRNA [NM_010415]///HBEGF_MOUSE (Q06186) Heparin-binding EGF-like growth factor precursor (HB-EGF) (HBEGF), partial (45%) [TC1621608]	15200	NM_010415	ENSMUST00000025363
A_65_P15262,A_55_P2498943,A_55_P2928897|80288	6.89596e-18	8.82375e-20	-2.33024	-1.10209	2.11438	-2.40345	-1.06125	2.26473	Bcl9l	B cell CLL/lymphoma 9-like	B cell CLL/lymphoma 9-like [Source:MGI Symbol;Acc:MGI:1933114] [ENSMUST00000218183]///Mus musculus B cell CLL/lymphoma 9-like (Bcl9l), mRNA [NM_030256]	80288	XM_017313700///NM_030256	ENSMUST00000218183///ENSMUST00000220303
A_51_P133612|67177	7.10979e-18	9.20066e-20	-1.43977	1.05131	1.51365	-1.48789	1.00798	1.49976	Cdt1	chromatin licensing and DNA replication factor 1	Mus musculus chromatin licensing and DNA replication factor 1 (Cdt1), mRNA [NM_026014]	67177	NM_026014	ENSMUST00000006760
A_55_P2033586,A_66_P101275,A_51_P157976|77697	7.10979e-18	9.20899e-20	-2.12772	-1.72201	1.2356	-2.03405	-1.75684	1.15779	Mmab	methylmalonic aciduria (cobalamin deficiency) cblB type homolog (human)	Mus musculus methylmalonic aciduria (cobalamin deficiency) cblB type homolog (human) (Mmab), transcript variant 2, mRNA [NM_001347398]///methylmalonic aciduria (cobalamin deficiency) cblB type homolog (human) [Source:MGI Symbol;Acc:MGI:1924947] [ENSMUST00000123256]///Mus musculus methylmalonic aciduria (cobalamin deficiency) cblB type homolog (human) (Mmab), transcript variant 1, mRNA [NM_029956]	77697	NM_001347398///NM_029956	ENSMUST00000112245///ENSMUST00000123256///ENSMUST00000031560
A_51_P472726,A_52_P264669|213019	7.10979e-18	9.23349e-20	-2.10924	1.20245	2.53626	-2.18249	1.23196	2.68875	Pdlim2	PDZ and LIM domain 2	Mus musculus PDZ and LIM domain 2 (Pdlim2), transcript variant 1, mRNA [NM_145978]	213019	NM_145978	ENSMUST00000129174///ENSMUST00000138792
A_55_P2178803,A_51_P345396|230119	7.10979e-18	9.2025e-20	-1.98185	-1.01479	1.95297	-2.32825	-1.04953	2.21838	Zbtb5	zinc finger and BTB domain containing 5	Mus musculus zinc finger and BTB domain containing 5 (Zbtb5), transcript variant 1, mRNA [NM_001163284]///Mus musculus zinc finger and BTB domain containing 5 (Zbtb5), transcript variant 3, mRNA [NM_173399]	230119	NM_001163284///NM_173399	ENSMUST00000107817///ENSMUST00000180217
A_51_P409694|56742	7.14367e-18	9.30587e-20	-2.01018	-1.03079	1.95014	-2.00008	-1.02376	1.95367	Psrc1	proline/serine-rich coiled-coil 1	Mus musculus proline/serine-rich coiled-coil 1 (Psrc1), transcript variant 2, mRNA [NM_019976]	56742	NM_019976	ENSMUST00000090561
A_51_P317443,A_66_P100733|70333	7.30857e-18	9.5497e-20	3.38016	1.02442	-3.29957	3.60451	1.24288	-2.90012	Cd3eap	CD3E antigen, epsilon polypeptide associated protein	Mus musculus CD3E antigen, epsilon polypeptide associated protein (Cd3eap), mRNA [NM_145822]	70333	NM_145822	ENSMUST00000047036
A_65_P08480,A_52_P664506,A_55_P2718038|54608	7.47889e-18	9.80195e-20	2.18282	-1.04791	-2.28741	2.28892	-1.19114	-2.72642	Abhd2	abhydrolase domain containing 2	abhydrolase domain containing 2 [Source:MGI Symbol;Acc:MGI:1914344] [ENSMUST00000037315]///Mus musculus abhydrolase domain containing 2 (Abhd2), mRNA [NM_018811]///abhydrolase domain containing 2 [Source:MGI Symbol;Acc:MGI:1914344] [ENSMUST00000135333]	54608	NM_018811	ENSMUST00000037315///ENSMUST00000135333
A_52_P263673,A_66_P109220,A_55_P2137840|320204	7.56796e-18	9.94875e-20	-3.29364	-1.06716	3.08635	-3.13084	-1.17027	2.67532	Etfbkmt	electron transfer flavoprotein beta subunit lysine methyltransferase	Mus musculus electron transfer flavoprotein beta subunit lysine methyltransferase (Etfbkmt), transcript variant 4, mRNA [NM_177101]///electron transfer flavoprotein beta subunit lysine methyltransferase [Source:MGI Symbol;Acc:MGI:2443575] [ENSMUST00000111548]///Mus musculus electron transfer flavoprotein beta subunit lysine methyltransferase (Etfbkmt), transcript variant 5, mRNA [NM_001252097]	320204	NM_177101///NM_001252097	ENSMUST00000134306///ENSMUST00000111548///ENSMUST00000047531
A_51_P141634,A_55_P2740879|244631	7.81279e-18	1.03016e-19	-2.44165	-1.17147	2.08427	-2.53578	-1.2014	2.11069	Pskh1	protein serine kinase H1	Mus musculus protein serine kinase H1 (Pskh1), mRNA [NM_173432]	244631	NM_173432	ENSMUST00000049699
A_55_P2715422,A_51_P463765,A_55_P2865447|21859	7.93671e-18	1.05596e-19	1.76793	-1.16405	-2.05795	1.8723	-1.17913	-2.20769	Timp3	tissue inhibitor of metalloproteinase 3	tissue inhibitor of metalloproteinase 3 [Source:MGI Symbol;Acc:MGI:98754] [ENSMUST00000151134]///Mus musculus tissue inhibitor of metalloproteinase 3 (Timp3), mRNA [NM_011595]	21859	NM_011595	ENSMUST00000151134///ENSMUST00000020234
A_52_P250865,A_55_P2219765,A_51_P162272|22418	7.93671e-18	1.05423e-19	-2.12141	1.25782	2.66835	-2.08864	1.0939	2.28477	Wnt5a	wingless-type MMTV integration site family, member 5A	wingless-type MMTV integration site family, member 5A [Source:MGI Symbol;Acc:MGI:98958] [ENSMUST00000063465]///Mus musculus wingless-type MMTV integration site family, member 5A (Wnt5a), transcript variant 1, mRNA [NM_009524]	22418	XM_006518923///NM_009524	ENSMUST00000063465///ENSMUST00000112272///ENSMUST00000134163
A_55_P2066697|217333	7.93671e-18	1.05097e-19	2.28832	1.07537	-2.12793	2.26546	1.08908	-2.08016	Trim47	tripartite motif-containing 47	Mus musculus tripartite motif-containing 47 (Trim47), transcript variant 1, mRNA [NM_001205081]	217333	NM_001205081	ENSMUST00000021120
A_55_P2724604|68318	7.95835e-18	1.06376e-19	-6.22308	-1.41398	4.40112	-5.8226	-1.78577	3.26055	Aph1c	aph1 homolog C, gamma secretase subunit	Mus musculus aph1 homolog C, gamma secretase subunit (Aph1c), mRNA [NM_026674]	68318	NM_026674	ENSMUST00000169282
A_55_P2103880,A_55_P1986486,A_55_P2731906,A_55_P2732663|57080	7.95835e-18	1.06516e-19	-1.83322	1.09057	1.99925	-1.99452	1.01074	2.01595	Gtf2ird1	general transcription factor II I repeat domain-containing 1	Mus musculus general transcription factor II I repeat domain-containing 1 (Gtf2ird1), transcript variant 1, mRNA [NM_020331]///Mus musculus general transcription factor II I repeat domain-containing 1 (Gtf2ird1), transcript variant 12, mRNA [NM_001347488]///general transcription factor II I repeat domain-containing 1 [Source:MGI Symbol;Acc:MGI:1861942] [ENSMUST00000202414]///general transcription…	57080	NM_020331///NM_001347488	ENSMUST00000202829///ENSMUST00000111244///ENSMUST00000202414///ENSMUST00000202335
A_51_P179258,A_55_P2743857,A_66_P116906,A_51_P483454,A_55_P2264483|269152	8.26932e-18	1.11006e-19	-4.19957	-1.49537	2.80838	-4.6729	-1.72742	2.70513	Kif26b	kinesin family member 26B	Mus musculus kinesin family member 26B (Kif26b), mRNA [NM_001161665]///kinesin family member 26B [Source:MGI Symbol;Acc:MGI:2447076] [ENSMUST00000193931]///kinesin family member 26B [Source:MGI Symbol;Acc:MGI:2447076] [ENSMUST00000161017]	269152	NM_001161665///XM_011238822	ENSMUST00000160789///ENSMUST00000193931///ENSMUST00000161017
A_55_P2868246|67608	8.35707e-18	1.12516e-19	-3.43521	-1.18089	2.90901	-3.9471	-1.15488	3.41776	Narf	nuclear prelamin A recognition factor	Mus musculus nuclear prelamin A recognition factor (Narf), mRNA [NM_026272]	67608	NM_026272	ENSMUST00000103015
A_52_P416756|110956	8.42952e-18	1.13826e-19	-6.53031	-1.09379	5.97033	-7.85049	-1.41821	5.5355	D17H6S56E-5	DNA segment, Chr 17, human D6S56E 5	Mus musculus DNA segment, Chr 17, human D6S56E 5 (D17H6S56E-5), mRNA [NM_033075]	110956	NM_033075
A_51_P347764|57753	8.44764e-18	1.14407e-19	3.47786	1.19007	-2.92239	3.53498	1.31599	-2.68618	Noc3l	NOC3 like DNA replication regulator	Mus musculus NOC3 like DNA replication regulator (Noc3l), mRNA [NM_021315]	57753	NM_021315	ENSMUST00000025963
A_55_P1970695,A_51_P211341|78655	8.57795e-18	1.16512e-19	2.19552	-1.22194	-2.68279	2.33098	-1.11544	-2.60006	Eif3j1	eukaryotic translation initiation factor 3, subunit J1	eukaryotic translation initiation factor 3, subunit J1 [Source:MGI Symbol;Acc:MGI:1925905] [ENSMUST00000028668]///Mus musculus eukaryotic translation initiation factor 3, subunit J1 (Eif3j1), mRNA [NM_144545]	78655	NM_144545	ENSMUST00000028668
A_55_P2736665,A_51_P181772,A_55_P2023878|19267	8.69744e-18	1.19171e-19	7.46599	1.38014	-5.40959	8.21088	1.38424	-5.93169	Ptpre	protein tyrosine phosphatase, receptor type, E	Mus musculus protein tyrosine phosphatase, receptor type, E (Ptpre), transcript variant 2, mRNA [NM_011212]///protein tyrosine phosphatase, receptor type, E [Source:MGI Symbol;Acc:MGI:97813] [ENSMUST00000211092]	19267	NM_011212	ENSMUST00000211140///ENSMUST00000210833///ENSMUST00000211092
A_51_P490509|12236	8.69744e-18	1.19053e-19	-2.67139	-1.01052	2.64359	-2.70204	-1.10929	2.43584	Bub1b	BUB1B, mitotic checkpoint serine/threonine kinase	Mus musculus BUB1B, mitotic checkpoint serine/threonine kinase (Bub1b), mRNA [NM_009773]	12236	NM_009773	ENSMUST00000038341
A_55_P2099650|94249	8.69744e-18	1.18563e-19	-3.89992	-1.24921	3.12192	-3.78153	-1.25474	3.0138	Slc24a3	solute carrier family 24 (sodium/potassium/calcium exchanger), member 3	Mus musculus solute carrier family 24 (sodium/potassium/calcium exchanger), member 3 (Slc24a3), mRNA [NM_053195]	94249	NM_053195	ENSMUST00000110007
A_55_P2178608	8.97022e-18	1.23265e-19	2.77631	1.35043	-2.05588	2.9262	1.23139	-2.37633
A_51_P462192,A_55_P2745275|108078	8.97176e-18	1.23643e-19	7.60659	1.38822	-5.47938	6.61384	1.22494	-5.39932	Olr1	oxidized low density lipoprotein (lectin-like) receptor 1	Mus musculus oxidized low density lipoprotein (lectin-like) receptor 1 (Olr1), transcript variant 1, mRNA [NM_138648]	108078	NM_138648	ENSMUST00000032265///ENSMUST00000182784
A_51_P505172|106795	9.06854e-18	1.25697e-19	-1.94168	-1.07495	1.8063	-2.08323	-1.00044	2.08231	Tcf19	transcription factor 19	Mus musculus transcription factor 19 (Tcf19), transcript variant 3, mRNA [NM_025674]	106795	NM_025674	ENSMUST00000161012
A_55_P2069755|72962	9.06854e-18	1.25514e-19	3.31382	1.06699	-3.10576	3.55065	1.30054	-2.73013	Tymp	thymidine phosphorylase	Mus musculus thymidine phosphorylase (Tymp), mRNA [NM_138302]	72962	NM_138302	ENSMUST00000023285
A_66_P121637,A_51_P255329|67045	9.30101e-18	1.29825e-19	2.4397	1.18521	-2.05846	2.70903	1.39509	-1.94183	Riok2	RIO kinase 2 (yeast)	Mus musculus RIO kinase 2 (yeast) (Riok2), mRNA [NM_025934]	67045	NM_025934	ENSMUST00000024620
A_55_P1962289	9.30101e-18	1.30351e-19	-6.49153	1.26959	8.2416	-7.08676	-1.13114	6.26512			ZDH18_HUMAN (Q9NUE0) Palmitoyltransferase ZDHHC18 (Zinc finger DHHC domain-containing protein 18) (DHHC-18) , partial (6%) [TC1615033]
A_55_P2245920|241296	9.30101e-18	1.30397e-19	2.49683	1.10323	-2.2632	2.57783	1.17539	-2.19316	Lrrc8a	leucine rich repeat containing 8A	Mus musculus leucine rich repeat containing 8A (Lrrc8a), mRNA [NM_177725]	241296	NM_177725	ENSMUST00000113654
A_65_P06446,A_52_P228236|22042	9.30101e-18	1.29653e-19	3.89298	1.69832	-2.29225	3.80359	1.95876	-1.94183	Tfrc	transferrin receptor	Mus musculus transferrin receptor (Tfrc), mRNA [NM_011638]	22042	NM_011638	ENSMUST00000155929///ENSMUST00000128285
A_55_P2158873,A_66_P111547,A_52_P485700|67738	9.341e-18	1.31328e-19	2.0071	1.38499	-1.44917	1.96197	1.34838	-1.45506	Ppid	peptidylprolyl isomerase D (cyclophilin D)	Mus musculus peptidylprolyl isomerase D (cyclophilin D) (Ppid), mRNA [NM_026352]	67738	NM_026352	ENSMUST00000118938///ENSMUST00000161876///ENSMUST00000161460
A_55_P2759760,A_52_P527874|107094	9.70307e-18	1.36804e-19	5.0502	1.30848	-3.85959	4.69804	1.61353	-2.91164	Rrp12	ribosomal RNA processing 12 homolog (S. cerevisiae)	Mus musculus ribosomal RNA processing 12 homolog (S. cerevisiae) (Rrp12), mRNA [NM_199447]	107094	NM_199447	ENSMUST00000038677
A_55_P2740649,A_51_P238786|17210	9.74788e-18	1.37823e-19	1.92275	1.14797	-1.6749	2.03113	1.17557	-1.72778	Mcl1	myeloid cell leukemia sequence 1	Mus musculus myeloid cell leukemia sequence 1 (Mcl1), mRNA [NM_008562]	17210	NM_008562	ENSMUST00000037947
A_51_P315904|23882	9.78169e-18	1.3869e-19	-1.05398	-4.58517	-4.35035	-1.04752	-5.77573	-5.51372	Gadd45g	growth arrest and DNA-damage-inducible 45 gamma	Mus musculus growth arrest and DNA-damage-inducible 45 gamma (Gadd45g), mRNA [NM_011817]	23882	NM_011817	ENSMUST00000021903
A_52_P120803|107765	9.95624e-18	1.4156e-19	4.78923	1.35897	-3.52416	4.82989	1.16983	-4.12872	Ankrd1	ankyrin repeat domain 1 (cardiac muscle)	Mus musculus ankyrin repeat domain 1 (cardiac muscle) (Ankrd1), mRNA [NM_013468]	107765	NM_013468	ENSMUST00000025718
A_55_P2011385,A_51_P249989|211550	1.00377e-17	1.43117e-19	-9.34586	-1.15634	8.08227	-9.90412	-1.57023	6.30744	Tifa	TRAF-interacting protein with forkhead-associated domain	PREDICTED: Mus musculus TRAF-interacting protein with forkhead-associated domain (Tifa), transcript variant X4, mRNA [XM_006501239]///Mus musculus TRAF-interacting protein with forkhead-associated domain (Tifa), mRNA [NM_145133]	211550	XM_006501239///NM_145133	ENSMUST00000163775
A_66_P115541|20667	1.02244e-17	1.46185e-19	-3.52932	1.02324	3.61136	-4.11691	-1.26658	3.25041	Sox12	SRY (sex determining region Y)-box 12	Mus musculus SRY (sex determining region Y)-box 12 (Sox12), mRNA [NM_011438]	20667	NM_011438	ENSMUST00000063332
A_55_P1956847|70769	1.04552e-17	1.499e-19	1.98014	1.26537	-1.56487	2.18495	1.34215	-1.62795	Nolc1	nucleolar and coiled-body phosphoprotein 1	Mus musculus nucleolar and coiled-body phosphoprotein 1 (Nolc1), transcript variant 3, mRNA [NM_001039352]	70769	NM_001039352	ENSMUST00000165017
A_65_P19862,A_52_P334562|22337	1.1379e-17	1.63596e-19	-5.42577	-1.75594	3.08996	-5.82212	-1.96914	2.95668	Vdr	vitamin D (1,25-dihydroxyvitamin D3) receptor	Q8WRD9_AEDTR (Q8WRD9) Inhibitor of apotosis protein 1-like protein, partial (5%) [TC1723288]///Mus musculus vitamin D receptor (Vdr), mRNA [NM_009504]	22337	NM_009504	ENSMUST00000023119
A_52_P639689,A_55_P2121275|236749	1.16311e-17	1.67683e-19	2.06465	1.02045	-2.02326	2.00015	1.08881	-1.83701	Gm4907	predicted gene 4907	Mus musculus predicted gene 4907 (Gm4907), mRNA [NM_001034864]	236749	NM_001034864	ENSMUST00000163718///ENSMUST00000116614
A_55_P2817111|68493	1.21609e-17	1.75804e-19	3.69126	1.62181	-2.27602	3.42674	1.94929	-1.75795	Ndufaf4	NADH dehydrogenase (ubiquinone) 1 alpha subcomplex, assembly factor 4	Mus musculus NADH dehydrogenase (ubiquinone) 1 alpha subcomplex, assembly factor 4 (Ndufaf4), mRNA [NM_026742]	68493	NM_026742	ENSMUST00000151249
A_51_P140237|14200	1.21838e-17	1.76618e-19	7.70538	1.46051	-5.2758	8.48611	1.53095	-5.54304	Fhl2	four and a half LIM domains 2	Mus musculus four and a half LIM domains 2 (Fhl2), transcript variant 1, mRNA [NM_010212]	14200	NM_010212	ENSMUST00000008280
A_66_P132518,A_66_P138309,A_51_P166244,A_52_P19606,A_52_P18705,A_55_P2029503|64291	1.22175e-17	1.77592e-19	-1.90566	-1.03677	1.83807	-1.85617	-1.08823	1.70568	Osbpl1a	oxysterol binding protein-like 1A	oxysterol binding protein-like 1A [Source:MGI Symbol;Acc:MGI:1927551] [ENSMUST00000141651]///oxysterol binding protein-like 1A [Source:MGI Symbol;Acc:MGI:1927551] [ENSMUST00000142467]///Mus musculus oxysterol binding protein-like 1A (Osbpl1a), transcript variant 1, mRNA [NM_207530]	64291	XM_006526141///NM_207530	ENSMUST00000141651///ENSMUST00000142467///ENSMUST00000119043///ENSMUST00000145777///ENSMUST00000147197///ENSMUST00000122175
A_52_P141112,A_51_P221949|70425	1.23537e-17	1.80062e-19	1.95387	1.06338	-1.83742	1.95951	1.09606	-1.78778	Csnk1g3	casein kinase 1, gamma 3	Mus musculus casein kinase 1, gamma 3 (Csnk1g3), mRNA [NM_152809]	70425	NM_152809	ENSMUST00000118956///ENSMUST00000069597
A_51_P367125|18971	1.24073e-17	1.81337e-19	-2.33224	-1.12379	2.07533	-2.61486	-1.12371	2.32699	Pold1	polymerase (DNA directed), delta 1, catalytic subunit	Mus musculus polymerase (DNA directed), delta 1, catalytic subunit (Pold1), mRNA [NM_011131]	18971	NM_011131	ENSMUST00000151793
A_55_P2184931,A_51_P144512|74111	1.24951e-17	1.83117e-19	2.77956	1.19117	-2.33347	2.7218	1.4225	-1.91339	Rbm19	RNA binding motif protein 19	Mus musculus RNA binding motif protein 19 (Rbm19), mRNA [NM_028762]	74111	NM_028762	ENSMUST00000202777///ENSMUST00000200841
A_55_P1989981|227737	1.29149e-17	1.89781e-19	2.98394	1.04706	-2.84982	3.16392	1.08944	-2.90418	Fam129b	family with sequence similarity 129, member B	Mus musculus family with sequence similarity 129, member B (Fam129b), mRNA [NM_146119]	227737	NM_146119	ENSMUST00000028135
A_55_P2044433,A_66_P114006,A_51_P268748|73144	1.30626e-17	1.92799e-19	9.81032	8.45118	-1.16082	9.83783	6.53655	-1.50505	3110039I08Rik	RIKEN cDNA 3110039I08 gene	Mus musculus RIKEN cDNA 3110039I08 gene (3110039I08Rik), transcript variant 4, long non-coding RNA [NR_131930]///Mus musculus RIKEN cDNA 3110039I08 gene (3110039I08Rik), transcript variant 6, long non-coding RNA [NR_015483]	73144	NR_131930///NR_015483
A_51_P299287|114663	1.30626e-17	1.92989e-19	-2.10218	-1.23657	1.7	-2.19464	-1.2109	1.8124	Impa2	inositol (myo)-1(or 4)-monophosphatase 2	Mus musculus inositol (myo)-1(or 4)-monophosphatase 2 (Impa2), mRNA [NM_053261]	114663	NM_053261	ENSMUST00000025403
A_55_P2109927,A_51_P434171|66196	1.33693e-17	1.98052e-19	2.76326	1.41013	-1.95958	2.70197	1.55504	-1.73756	Myo19	myosin XIX	myosin XIX [Source:MGI Symbol;Acc:MGI:1913446] [ENSMUST00000020837]///Mus musculus myosin XIX (Myo19), mRNA [NM_025414]	66196	NM_025414	ENSMUST00000020837///ENSMUST00000141705
A_52_P595561,A_51_P323521|101113	1.37015e-17	2.03517e-19	-2.17864	-1.20586	1.80671	-2.38955	-1.2534	1.90646	Snx21	sorting nexin family member 21	Mus musculus sorting nexin family member 21 (Snx21), mRNA [NM_133924]	101113	NM_133924	ENSMUST00000152471///ENSMUST00000172577
A_52_P8903|320351	1.37449e-17	2.04708e-19	3.13863	1.16561	-2.6927	3.25671	1.14478	-2.84483	Tmem251	transmembrane protein 251	Mus musculus transmembrane protein 251 (Tmem251), transcript variant 1, mRNA [NM_177140]	320351	NM_177140	ENSMUST00000057416
A_52_P180499,A_51_P176783,A_55_P2126489|382423	1.3864e-17	2.08683e-19	1.59218	-1.0748	-1.71127	1.62708	1.00841	-1.6135	Atxn7l3b	ataxin 7-like 3B	BB458124 RIKEN full-length enriched, 12 days embryo spinal ganglion Mus musculus cDNA clone D130055C24 3'. [BB458124]///Mus musculus ataxin 7-like 3B (Atxn7l3b), mRNA [NM_001033474]	382423	NM_001033474	ENSMUST00000099276
A_51_P272817,A_55_P2805669,A_66_P124118|26397	1.3864e-17	2.07579e-19	3.28708	1.1718	-2.80515	3.31931	1.29218	-2.56877	Map2k3	mitogen-activated protein kinase kinase 3	Mus musculus mitogen-activated protein kinase kinase 3 (Map2k3), mRNA [NM_008928]///mitogen-activated protein kinase kinase 3 [Source:MGI Symbol;Acc:MGI:1346868] [ENSMUST00000145828]	26397	NM_008928	ENSMUST00000130269///ENSMUST00000145828
A_51_P180492,A_55_P2032079|13170	1.3864e-17	2.07785e-19	-3.9129	-1.28059	3.05554	-3.89429	-1.48387	2.62441	Dbp	D site albumin promoter binding protein	Mus musculus D site albumin promoter binding protein (Dbp), mRNA [NM_016974]	13170	NM_016974	ENSMUST00000211748///ENSMUST00000080885
A_55_P1998947,A_52_P325477|94092	1.3864e-17	2.0825e-19	14.7959	1.28727	-11.494	16.6492	1.83614	-9.06753	Trim16	tripartite motif-containing 16	Mus musculus tripartite motif-containing 16 (Trim16), mRNA [NM_053169]	94092	NM_053169	ENSMUST00000108703///ENSMUST00000072639
A_55_P2718906,A_66_P136299,A_51_P388374|67418	1.38706e-17	2.09334e-19	1.67009	1.08393	-1.54076	1.70753	1.17122	-1.45791	Ppil4	peptidylprolyl isomerase (cyclophilin)-like 4	peptidylprolyl isomerase (cyclophilin)-like 4 [Source:MGI Symbol;Acc:MGI:1914668] [ENSMUST00000143214]///Mus musculus peptidylprolyl isomerase (cyclophilin)-like 4 (Ppil4), mRNA [NM_026141]	67418	NM_026141	ENSMUST00000143214///ENSMUST00000138151///ENSMUST00000015901
A_66_P130669,A_55_P1981381,A_65_P04394,A_51_P199354|226519	1.393e-17	2.10784e-19	2.31644	1.05359	-2.19861	2.2637	-1.00378	-2.27225	Lamc1	laminin, gamma 1	Mus musculus laminin, gamma 1 (Lamc1), mRNA [NM_010683]///laminin, gamma 1 [Source:MGI Symbol;Acc:MGI:99914] [ENSMUST00000159251]	226519	NM_010683	ENSMUST00000163011///ENSMUST00000027752///ENSMUST00000159251
A_30_P01031633	1.40798e-17	2.1361e-19	6.08633	1.83405	-3.31852	5.16563	1.79643	-2.8755			lincRNA:chr10:120058696-120076196 reverse strand
A_51_P144770,A_52_P305851|668661	1.41115e-17	2.14651e-19	2.24383	1.25752	-1.78434	2.23633	1.32864	-1.68318	2410002F23Rik	RIKEN cDNA 2410002F23 gene	Mus musculus RIKEN cDNA 2410002F23 gene (2410002F23Rik), mRNA [NM_025880]	668661	NM_025880	ENSMUST00000071296
A_51_P345836|23992	1.41525e-17	2.16027e-19	-2.41223	-1.17629	2.05072	-2.77508	-1.31719	2.10682	Prkra	protein kinase, interferon inducible double stranded RNA dependent activator	Mus musculus protein kinase, interferon inducible double stranded RNA dependent activator (Prkra), mRNA [NM_011871]	23992	NM_011871	ENSMUST00000002808
A_51_P300337|13008	1.41525e-17	2.16399e-19	1.62778	-1.1432	-1.86087	1.65711	-1.20419	-1.99547	Csrp2	cysteine and glycine-rich protein 2	Mus musculus cysteine and glycine-rich protein 2 (Csrp2), mRNA [NM_007792]	13008	NM_007792	ENSMUST00000220301
A_52_P604345	1.41597e-17	2.18232e-19	8.30221	7.59803	-1.09268	8.39952	5.76076	-1.45806
A_52_P328825,A_51_P390314,A_55_P2925193,A_55_P2070686|69368	1.41597e-17	2.17466e-19	1.66003	-1.06542	-1.76862	1.69948	-1.12161	-1.90615	Wdfy1	WD repeat and FYVE domain containing 1	Mus musculus WD repeat and FYVE domain containing 1 (Wdfy1), transcript variant 1, mRNA [NM_001111279]///WD repeat and FYVE domain containing 1 [Source:MGI Symbol;Acc:MGI:1916618] [ENSMUST00000125641]///Mus musculus WD repeat and FYVE domain containing 1 (Wdfy1), transcript variant 2, mRNA [NM_027057]	69368	NM_001111279///XM_017322386///NM_027057	ENSMUST00000113512///ENSMUST00000187005///ENSMUST00000125641///ENSMUST00000113511
A_66_P117187|19106	1.41597e-17	2.18759e-19	-2.97057	-1.25442	2.36808	-3.51151	-1.35008	2.60097	Eif2ak2	eukaryotic translation initiation factor 2-alpha kinase 2	Mus musculus eukaryotic translation initiation factor 2-alpha kinase 2 (Eif2ak2), mRNA [NM_011163]	19106	NM_011163	ENSMUST00000024884
A_55_P2811733|231151	1.41597e-17	2.18026e-19	2.85131	1.26198	-2.25939	2.77893	1.4517	-1.91426	Tada2b	transcriptional adaptor 2B	Mus musculus transcriptional adaptor 2B (Tada2b), mRNA [NM_001170454]	231151	NM_001170454	ENSMUST00000031097
A_55_P1966804|110196	1.41807e-17	2.19646e-19	-1.2669	-2.2938	-1.81056	-1.1856	-2.52168	-2.12693	Fdps	farnesyl diphosphate synthetase	Mus musculus farnesyl diphosphate synthetase (Fdps), transcript variant 1, mRNA [NM_001253751]	110196	NM_001253751	ENSMUST00000196709
A_51_P150763|252967	1.41947e-17	2.20426e-19	-1.59519	-2.11105	-1.32339	-1.65143	-2.60686	-1.57855	Ropn1l	ropporin 1-like	Mus musculus ropporin 1-like (Ropn1l), mRNA [NM_145852]	252967	NM_145852	ENSMUST00000110408
A_55_P2255449	1.4365e-17	2.23642e-19	-4.18659	-1.0908	3.83811	-4.90581	-1.2799	3.83295			Q8NH31_HUMAN (Q8NH31) Seven transmembrane helix receptor, partial (8%) [TC1654052]
A_51_P475785|399568	1.44211e-17	2.25089e-19	-3.25248	-1.1526	2.82187	-3.52427	-1.26439	2.78734	BC052040	cDNA sequence BC052040	Mus musculus cDNA sequence BC052040 (BC052040), transcript variant 2, mRNA [NM_207264]	399568	NM_207264	ENSMUST00000166472
A_55_P2729553,A_52_P247185,A_52_P54274|17174	1.4554e-17	2.2774e-19	-5.81416	-2.02848	2.86627	-5.72948	-2.23723	2.56097	Masp1	mannan-binding lectin serine peptidase 1	Q920S0_MOUSE (Q920S0) MBL-associated serine protease-3, partial (35%) [TC1608130]///PREDICTED: Mus musculus mannan-binding lectin serine peptidase 1 (Masp1), transcript variant X1, mRNA [XM_006521828]///PREDICTED: Mus musculus mannan-binding lectin serine peptidase 1 (Masp1), transcript variant X2, mRNA [XM_006521829]	17174	XM_006521828///XM_006521829
A_51_P383991,A_55_P2163812|18952	1.4676e-17	2.30233e-19	-2.62007	-1.36966	1.91294	-2.75047	-1.56723	1.75499	Sept4	septin 4	Mus musculus septin 4 (Sept4), transcript variant 1, mRNA [NM_011129]///Mus musculus septin 4 (Sept4), transcript variant 3, mRNA [NM_001284394]	18952	NM_011129///NM_001284394	ENSMUST00000122067///ENSMUST00000107962
A_55_P2909732,A_55_P2020128|20148	1.46986e-17	2.3117e-19	-3.72176	-1.12609	3.30504	-4.19373	-1.29582	3.23635	Dhrs3	dehydrogenase/reductase (SDR family) member 3	Mus musculus dehydrogenase/reductase (SDR family) member 3 (Dhrs3), transcript variant 1, mRNA [NM_011303]	20148	NM_011303	ENSMUST00000084184///ENSMUST00000105744
A_55_P2822639|72504	1.47108e-17	2.31947e-19	4.78631	1.54543	-3.09707	4.85434	1.56751	-3.09685	Taf4b	TATA-box binding protein associated factor 4b	Mus musculus TATA-box binding protein associated factor 4b (Taf4b), mRNA [NM_001100449]	72504	NM_001100449	ENSMUST00000169862
A_52_P242251|215193	1.49628e-17	2.36515e-19	2.6919	1.28818	-2.0897	2.85888	1.38221	-2.06834	Diexf	digestive organ expansion factor homolog (zebrafish)	Mus musculus digestive organ expansion factor homolog (zebrafish) (Diexf), mRNA [NM_145415]	215193	NM_145415	ENSMUST00000195291
A_51_P450812,A_55_P2624937|102339	1.49675e-17	2.38373e-19	-1.92729	-1.01561	1.89768	-1.94305	1.02266	1.98708	Cog4	component of oligomeric golgi complex 4	Mus musculus component of oligomeric golgi complex 4 (Cog4), transcript variant 1, mRNA [NM_133973]///component of oligomeric golgi complex 4 [Source:MGI Symbol;Acc:MGI:2142808] [ENSMUST00000174702]	102339	NM_133973	ENSMUST00000034203///ENSMUST00000174702
A_55_P1999172,A_66_P102552|98956	1.49675e-17	2.37433e-19	2.55332	1.17346	-2.17589	2.45823	1.26275	-1.94674	Nat10	N-acetyltransferase 10	Mus musculus N-acetyltransferase 10 (Nat10), mRNA [NM_153126]	98956	NM_153126	ENSMUST00000133016///ENSMUST00000144590
A_51_P513032,A_52_P185876,A_55_P2005585|83925	1.49675e-17	2.37979e-19	-4.31749	-1.16766	3.69755	-4.55091	-1.45475	3.12832	Trps1	transcriptional repressor GATA binding 1	Mus musculus trichorhinophalangeal syndrome I (human) (Trps1), transcript variant 2, mRNA [NM_032000]///transcriptional repressor GATA binding 1 [Source:MGI Symbol;Acc:MGI:1927616] [ENSMUST00000183421]	83925	NM_032000	ENSMUST00000165201///ENSMUST00000183421///ENSMUST00000077935
A_55_P2089035,A_55_P2007273|18973	1.49881e-17	2.39295e-19	-2.13283	1.12675	2.40316	-2.16085	1.12228	2.42507	Pole	polymerase (DNA directed), epsilon	polymerase (DNA directed), epsilon [Source:MGI Symbol;Acc:MGI:1196391] [ENSMUST00000112482]///Mus musculus polymerase (DNA directed), epsilon (Pole), mRNA [NM_011132]	18973	NM_011132	ENSMUST00000112482///ENSMUST00000141506
A_55_P2740574,A_51_P320614|50493	1.54094e-17	2.47246e-19	2.24328	1.05082	-2.13478	2.59235	1.21795	-2.12846	Txnrd1	thioredoxin reductase 1	Mus musculus thioredoxin reductase 1 (Txnrd1), transcript variant 1, mRNA [NM_001042523]	50493	NM_001042523	ENSMUST00000219962///ENSMUST00000219442
A_51_P338443|57875	1.54094e-17	2.4687e-19	4.04431	1.28618	-3.14443	3.90396	1.52424	-2.56125	Angptl4	angiopoietin-like 4	Mus musculus angiopoietin-like 4 (Angptl4), mRNA [NM_020581]	57875	NM_020581	ENSMUST00000173869
A_55_P2931311,A_66_P116765,A_52_P575178|57810	1.55254e-17	2.49723e-19	-5.41055	-1.50736	3.58943	-6.67935	-1.85449	3.60171	Cdon	cell adhesion molecule-related/down-regulated by oncogenes	Mus musculus cell adhesion molecule-related/down-regulated by oncogenes (Cdon), mRNA [NM_021339]	57810	NM_021339	ENSMUST00000151682///ENSMUST00000154652///ENSMUST00000042842
A_51_P124748|21809	1.56908e-17	2.53007e-19	-5.96877	-1.67996	3.55293	-6.83624	-1.97143	3.46765	Tgfb3	transforming growth factor, beta 3	Mus musculus transforming growth factor, beta 3 (Tgfb3), mRNA [NM_009368]	21809	NM_009368	ENSMUST00000003687
A_51_P120830|17384	1.58822e-17	2.56725e-19	5.05323	2.81429	-1.79556	5.25421	2.15019	-2.44361	Mmp10	matrix metallopeptidase 10	Mus musculus matrix metallopeptidase 10 (Mmp10), mRNA [NM_019471]	17384	NM_019471	ENSMUST00000034488
A_51_P164014|229841	1.59347e-17	2.58205e-19	-1.61511	-1.12856	1.43112	-1.89837	-1.26814	1.49697	Cenpe	centromere protein E	Mus musculus centromere protein E (Cenpe), mRNA [NM_173762]	229841	NM_173762	ENSMUST00000062893
A_51_P202074,A_52_P682707|68298	1.59631e-17	2.593e-19	-2.31261	-1.11777	2.06895	-2.36928	-1.12415	2.10762	Ncapd2	non-SMC condensin I complex, subunit D2	Mus musculus non-SMC condensin I complex, subunit D2 (Ncapd2), mRNA [NM_146171]///non-SMC condensin I complex, subunit D2 [Source:MGI Symbol;Acc:MGI:1915548] [ENSMUST00000186561]	68298	NM_146171	ENSMUST00000043848///ENSMUST00000186561
A_55_P2910184|14281	1.59711e-17	2.60064e-19	-162.624	-53.8265	3.02127	-146.44	-94.602	1.54796	Fos	FBJ osteosarcoma oncogene	Mus musculus FBJ osteosarcoma oncogene (Fos), mRNA [NM_010234]	14281	NM_010234	ENSMUST00000021674
A_55_P2728623,A_55_P2082708|110816	1.60054e-17	2.61258e-19	3.24645	1.00642	-3.22573	3.17696	1.20403	-2.6386	Pwp2	PWP2 periodic tryptophan protein homolog (yeast)	Mus musculus PWP2 periodic tryptophan protein homolog (yeast) (Pwp2), mRNA [NM_029546]	110816	NM_029546	ENSMUST00000042556
A_55_P2819959,A_51_P183631,A_52_P137829,A_51_P337065|319518	1.60235e-17	2.62189e-19	-1.96261	1.11412	2.18658	-2.10537	-1.02925	2.04554	Pdpr	pyruvate dehydrogenase phosphatase regulatory subunit	Mus musculus pyruvate dehydrogenase phosphatase regulatory subunit (Pdpr), mRNA [NM_198308]///pyruvate dehydrogenase phosphatase regulatory subunit [Source:MGI Symbol;Acc:MGI:2442188] [ENSMUST00000144377]///pyruvate dehydrogenase phosphatase regulatory subunit [Source:MGI Symbol;Acc:MGI:2442188] [ENSMUST00000039333]///PREDICTED: Mus musculus pyruvate dehydrogenase phosphatase regulatory subunit (…	319518	NM_198308///XM_017312852///XM_006531084	ENSMUST00000144377///ENSMUST00000039333
A_51_P277756,A_55_P2744042|83770	1.62722e-17	2.66906e-19	3.02038	1.01926	-2.9633	2.8114	-1.16401	-3.27249	Tas1r2	taste receptor, type 1, member 2	Mus musculus taste receptor, type 1, member 2 (Tas1r2), mRNA [NM_031873]	83770	NM_031873	ENSMUST00000030510///ENSMUST00000166773
A_51_P367060,A_52_P124352,A_55_P2621848|15982	1.63759e-17	2.69256e-19	1.98565	1.04961	-1.8918	2.26398	1.13883	-1.98798	Ifrd1	interferon-related developmental regulator 1	Mus musculus interferon-related developmental regulator 1 (Ifrd1), mRNA [NM_013562]///interferon-related developmental regulator 1 [Source:MGI Symbol;Acc:MGI:1316717] [ENSMUST00000001672]	15982	NM_013562	ENSMUST00000170119///ENSMUST00000001672///ENSMUST00000171530
A_66_P111358,A_51_P521374,A_52_P166868|67725	1.65427e-17	2.72657e-19	-3.10317	1.06153	3.29412	-3.16375	1.00396	3.17628	Nudt13	nudix (nucleoside diphosphate linked moiety X)-type motif 13	Mus musculus nudix (nucleoside diphosphate linked moiety X)-type motif 13 (Nudt13), mRNA [NM_026341]///PREDICTED: Mus musculus nudix (nucleoside diphosphate linked moiety X)-type motif 13 (Nudt13), transcript variant X10, mRNA [XM_006519470]	67725	NM_026341///XM_006519470	ENSMUST00000022343
A_51_P489720|216867	1.6573e-17	2.73815e-19	22.8699	3.60683	-6.34073	23.2242	3.49053	-6.6535	Slc16a11	solute carrier family 16 (monocarboxylic acid transporters), member 11	Mus musculus solute carrier family 16 (monocarboxylic acid transporters), member 11 (Slc16a11), mRNA [NM_153081]	216867	NM_153081	ENSMUST00000171032
A_52_P484118,A_55_P2744439|382038	1.66907e-17	2.76422e-19	2.71395	1.33975	-2.02571	2.6308	1.26454	-2.08044	Urb2	URB2 ribosome biogenesis 2 homolog (S. cerevisiae)	Mus musculus URB2 ribosome biogenesis 2 homolog (S. cerevisiae) (Urb2), mRNA [NM_001029876]	382038	NM_001029876	ENSMUST00000173168
A_55_P2739152,A_52_P558859|66922	1.68063e-17	2.79003e-19	2.89533	1.07592	-2.69102	2.91829	1.037	-2.81416	Rras2	related RAS viral (r-ras) oncogene 2	Mus musculus related RAS viral (r-ras) oncogene 2 (Rras2), mRNA [NM_025846]	66922	NM_025846	ENSMUST00000210075
A_55_P2609358,A_55_P1965000,A_52_P523946,A_51_P393748|230073	1.69938e-17	2.82791e-19	-1.90267	-1.24086	1.53335	-2.02704	-1.31374	1.54296	Ddx58	DEAD (Asp-Glu-Ala-Asp) box polypeptide 58	Mus musculus DEAD (Asp-Glu-Ala-Asp) box polypeptide 58 (Ddx58), mRNA [NM_172689]	230073	NM_172689	ENSMUST00000139583///ENSMUST00000037907///ENSMUST00000127026///ENSMUST00000142055
A_55_P2178592,A_55_P2006615|26450	1.70464e-17	2.84343e-19	-2.13888	-1.14935	1.86094	-2.24202	-1.20802	1.85594	Rbbp9	retinoblastoma binding protein 9, serine hydrolase	Mus musculus retinoblastoma binding protein 9, serine hydrolase (Rbbp9), mRNA [NM_015754]	26450	NM_015754	ENSMUST00000140340///ENSMUST00000028915
A_51_P403049,A_51_P111018,A_55_P1970126,A_55_P2732091|320473	1.70842e-17	2.85653e-19	-2.46415	-1.24314	1.9822	-2.62163	-1.37541	1.90607	Heatr5b	HEAT repeat containing 5B	Mus musculus HEAT repeat containing 5B (Heatr5b), mRNA [NM_001081179]	320473	NM_001081179	ENSMUST00000097281
A_51_P416689|14042	1.71681e-17	2.87738e-19	2.28026	1.03126	-2.21114	2.35438	-1.04657	-2.46403	Ext1	exostoses (multiple) 1	Mus musculus exostoses (multiple) 1 (Ext1), mRNA [NM_010162]	14042	NM_010162	ENSMUST00000133362
A_52_P355222,A_52_P282500,A_51_P106815|16565	1.72338e-17	2.89523e-19	-2.46432	-1.06682	2.30997	-2.71368	-1.1542	2.35113	Kif21b	kinesin family member 21B	kinesin family member 21B [Source:MGI Symbol;Acc:MGI:109234] [ENSMUST00000130864]///Mus musculus kinesin family member 21B (Kif21b), mRNA [NM_001039472]	16565	NM_001039472	ENSMUST00000130864///ENSMUST00000165333
A_51_P199175|67194	1.78737e-17	3.00982e-19	3.94054	2.09768	-1.87852	4.05	2.38583	-1.69753	2700038G22Rik	RIKEN cDNA 2700038G22 gene	Mus musculus RIKEN cDNA 2700038G22 gene (2700038G22Rik), transcript variant 1, long non-coding RNA [NR_045040]	67194	NR_045040
A_51_P100174|17427	1.79823e-17	3.03525e-19	-2.60301	1.05194	2.73821	-2.78681	1.18592	3.30493	Mns1	meiosis-specific nuclear structural protein 1	Mus musculus meiosis-specific nuclear structural protein 1 (Mns1), mRNA [NM_008613]	17427	NM_008613	ENSMUST00000034746
A_52_P510583,A_52_P286342,A_55_P1999314|216877	1.81041e-17	3.06301e-19	2.78012	1.10336	-2.51969	2.66576	1.24053	-2.14888	Dhx33	DEAH (Asp-Glu-Ala-His) box polypeptide 33	DEAH (Asp-Glu-Ala-His) box polypeptide 33 [Source:MGI Symbol;Acc:MGI:2445102] [ENSMUST00000178218]///Mus musculus DEAH (Asp-Glu-Ala-His) box polypeptide 33 (Dhx33), mRNA [NM_178367]	216877	NM_178367	ENSMUST00000178218///ENSMUST00000049048///ENSMUST00000108527
A_52_P373205,A_52_P589509|244891	1.84645e-17	3.13131e-19	-5.35627	-1.31791	4.0642	-5.09717	-1.36963	3.72156	Scaper	S phase cyclin A-associated protein in the ER	S phase cyclin A-associated protein in the ER [Source:MGI Symbol;Acc:MGI:1925976] [ENSMUST00000214747]///Mus musculus S phase cyclin A-associated protein in the ER (Scaper), mRNA [NM_001081341]	244891	XM_006511166///NM_001081341	ENSMUST00000214747///ENSMUST00000217647
A_55_P2803974,A_52_P237414|99152	1.848e-17	3.14129e-19	-2.33231	-1.13938	2.047	-2.36317	-1.09071	2.16663	Anapc2	anaphase promoting complex subunit 2	Mus musculus anaphase promoting complex subunit 2 (Anapc2), mRNA [NM_175300]	99152	NM_175300	ENSMUST00000028341///ENSMUST00000125885
A_55_P2810278|276952	1.85268e-17	3.16395e-19	-6.0956	-1.59898	3.81217	-7.74673	-1.80695	4.28718	Rasl10b	RAS-like, family 10, member B	Mus musculus RAS-like, family 10, member B (Rasl10b), mRNA [NM_001013386]	276952	NM_001013386	ENSMUST00000175848
A_55_P2485264,A_52_P560728|68607	1.85268e-17	3.15882e-19	-2.91727	-1.32227	2.20626	-2.68236	-1.36817	1.96054	Serhl	serine hydrolase-like	Mus musculus serine hydrolase-like (Serhl), mRNA [NM_023475]	68607	NM_023475	ENSMUST00000171488///ENSMUST00000170891
A_52_P518997|13836	1.85594e-17	3.1769e-19	2.61645	1.09105	-2.39811	2.6333	1.07392	-2.45205	Epha2	Eph receptor A2	Mus musculus Eph receptor A2 (Epha2), mRNA [NM_010139]	13836	NM_010139	ENSMUST00000006614
A_51_P411770|66164	1.87476e-17	3.21656e-19	2.75379	1.07762	-2.55543	2.84037	1.16837	-2.43106	Nip7	NIP7, nucleolar pre-rRNA processing protein	Mus musculus NIP7, nucleolar pre-rRNA processing protein (Nip7), transcript variant 1, mRNA [NM_025391]	66164	NM_025391	ENSMUST00000034392
A_52_P423128,A_55_P2735850,A_55_P1977875|234023	1.91248e-17	3.28887e-19	2.25893	1.57286	-1.43619	2.26685	1.50231	-1.50892	Arglu1	arginine and glutamate rich 1	Mus musculus arginine and glutamate rich 1 (Arglu1), mRNA [NM_176849]///Q9VL71_DROME (Q9VL71) CG4602-PA (LD29830p), partial (6%) [TC1688722]	234023	NM_176849	ENSMUST00000208252///ENSMUST00000207817
A_51_P137383,A_66_P135247|67291	2.01654e-17	3.47583e-19	4.45672	1.18255	-3.76873	4.41349	1.26172	-3.49798	Ccdc137	coiled-coil domain containing 137	Mus musculus coiled-coil domain containing 137 (Ccdc137), mRNA [NM_152807]	67291	NM_152807	ENSMUST00000058370///ENSMUST00000176120
A_55_P2011722,A_51_P232868|240055	2.07325e-17	3.5818e-19	-9.32323	-1.42256	6.55385	-11.3008	-1.74674	6.46969	Neurl1b	neuralized E3 ubiquitin protein ligase 1B	Mus musculus neuralized E3 ubiquitin protein ligase 1B (Neurl1b), mRNA [NM_001081656]	240055	NM_001081656	ENSMUST00000053020
A_52_P577533|270097	2.07337e-17	3.59025e-19	-2.06466	-1.47287	1.40179	-2.05431	-1.59794	1.2856	Vat1l	vesicle amine transport protein 1 like	Mus musculus vesicle amine transport protein 1 like (Vat1l), mRNA [NM_173016]	270097	NM_173016	ENSMUST00000124143
A_55_P2159807,A_55_P2159801,A_65_P19522|106344	2.08238e-17	3.6354e-19	-2.07533	-1.14701	1.80934	-2.08795	-1.11541	1.87192	Rfc4	replication factor C (activator 1) 4	Mus musculus replication factor C (activator 1) 4 (Rfc4), mRNA [NM_145480]///replication factor C (activator 1) 4 [Source:MGI Symbol;Acc:MGI:2146571] [ENSMUST00000115338]	106344	NM_145480	ENSMUST00000115338///ENSMUST00000115337
A_30_P01032750	2.08238e-17	3.63894e-19	-3.3826	1.26585	4.28186	-3.10472	1.20149	3.73028			lincRNA:chr5:92556322-92558910 forward strand
A_51_P210560|320717	2.08238e-17	3.6251e-19	2.69272	1.48533	-1.81288	2.76975	1.48059	-1.87071	Pptc7	PTC7 protein phosphatase homolog	Mus musculus PTC7 protein phosphatase homolog (Pptc7), mRNA [NM_177242]	320717	NM_177242	ENSMUST00000053426
A_55_P2097729|69237	2.08238e-17	3.61427e-19	2.7222	1.22464	-2.22286	2.51603	1.29454	-1.94358	Gtpbp4	GTP binding protein 4	Mus musculus GTP binding protein 4 (Gtpbp4), mRNA [NM_027000]	69237	NM_027000	ENSMUST00000021574
A_66_P120853,A_55_P2147001|67936	2.14148e-17	3.75071e-19	1.91226	1.14005	-1.67736	1.83602	1.20789	-1.52002	Wdr55	WD repeat domain 55	Mus musculus WD repeat domain 55 (Wdr55), mRNA [NM_026464]	67936	NM_026464	ENSMUST00000049323
A_51_P232399|71670	2.16384e-17	3.79848e-19	-2.747	-1.60999	1.70622	-2.57853	-1.7251	1.49472	Acy3	aspartoacylase (aminoacylase) 3	Mus musculus aspartoacylase (aminoacylase) 3 (Acy3), transcript variant 1, mRNA [NM_001302479]	71670	NM_001302479	ENSMUST00000054030
A_51_P390522|117197	2.17684e-17	3.82994e-19	2.05022	1.07015	-1.91583	2.16943	1.13052	-1.91897	Bloc1s4	biogenesis of lysosomal organelles complex-1, subunit 4, cappuccino	Mus musculus biogenesis of lysosomal organelles complex-1, subunit 4, cappuccino (Bloc1s4), mRNA [NM_133724]	117197	NM_133724	ENSMUST00000071949
A_55_P1993594|319618	2.19991e-17	3.87926e-19	-4.78274	-1.68172	2.84396	-5.07899	-2.04918	2.47855	Dcp1b	decapping mRNA 1B	Mus musculus decapping mRNA 1B (Dcp1b), mRNA [NM_001033379]	319618	NM_001033379	ENSMUST00000073909
A_51_P140368|66531	2.23856e-17	3.95631e-19	-2.11378	-1.15365	1.83226	-2.16122	-1.08258	1.99635	Cmc2	COX assembly mitochondrial protein 2	Mus musculus COX assembly mitochondrial protein 2 (Cmc2), mRNA [NM_026844]	66531	NM_026844	ENSMUST00000128304
A_66_P122981,A_51_P237834|330401	2.24218e-17	3.97162e-19	1.58139	-1.21815	-1.92637	1.74218	-1.38007	-2.40432	Tmcc1	transmembrane and coiled coil domains 1	Mus musculus transmembrane and coiled coil domains 1 (Tmcc1), mRNA [NM_177412]	330401	NM_177412	ENSMUST00000173140///ENSMUST00000172510
A_52_P147803|233066	2.2435e-17	3.98286e-19	-2.90275	-1.32227	2.19529	-2.95506	-1.32538	2.22959	Syne4	spectrin repeat containing, nuclear envelope family member 4	Mus musculus spectrin repeat containing, nuclear envelope family member 4 (Syne4), transcript variant 1, mRNA [NM_153577]	233066	NM_153577	ENSMUST00000176536
A_52_P256929,A_52_P203798|17532	2.28843e-17	4.07172e-19	-1.98074	-1.42435	1.39063	-2.09913	-1.55044	1.3539	Mras	muscle and microspikes RAS	Mus musculus muscle and microspikes RAS (Mras), mRNA [NM_008624]	17532	NM_008624	ENSMUST00000147078///ENSMUST00000035045
A_55_P2121491,A_55_P2714926|319845	2.28914e-17	4.08206e-19	-3.71946	-1.08423	3.43052	-3.21584	-1.17649	2.73343	Bbs9	Bardet-Biedl syndrome 9 (human)	Mus musculus Bardet-Biedl syndrome 9 (human) (Bbs9), transcript variant 1, mRNA [NM_178415]///Bardet-Biedl syndrome 9 (human) [Source:MGI Symbol;Acc:MGI:2442833] [ENSMUST00000130479]	319845	NM_178415	ENSMUST00000147712///ENSMUST00000130479
A_55_P2745249,A_52_P367520|68810	2.44404e-17	4.36799e-19	-2.0583	-1.19176	1.72711	-2.20609	-1.36653	1.61438	Nexn	nexilin	Mus musculus nexilin (Nexn), mRNA [NM_199465]	68810	NM_199465	ENSMUST00000199423///ENSMUST00000046045
A_55_P2911556,A_55_P2716481|216846	2.47773e-17	4.43805e-19	-2.50072	1.1669	2.9181	-2.78512	1.10585	3.07993	Cntrob	centrobin, centrosomal BRCA2 interacting protein	Mus musculus centrobin, centrosomal BRCA2 interacting protein (Cntrob), mRNA [NM_172560]///centrobin, centrosomal BRCA2 interacting protein [Source:MGI Symbol;Acc:MGI:2443290] [ENSMUST00000156175]	216846	NM_172560	ENSMUST00000176938///ENSMUST00000156175
A_55_P2062246|100039796	2.49197e-17	4.47346e-19	-6.10723	-1.80347	3.38638	-6.07074	-2.17969	2.78514	Tgtp2	T cell specific GTPase 2	Mus musculus T cell specific GTPase 2 (Tgtp2), mRNA [NM_001145164]	100039796	NM_001145164	ENSMUST00000068063
A_55_P1984009|100037282	2.49852e-17	4.49513e-19	-2.71833	-1.36104	1.99725	-2.53785	-1.44662	1.75433	Rsph3b	radial spoke 3B homolog (Chlamydomonas)	Mus musculus radial spoke 3B homolog (Chlamydomonas) (Rsph3b), mRNA [NM_001083945]	100037282	NM_001083945	ENSMUST00000024572
A_55_P2024858,A_52_P422222|69955	2.53283e-17	4.56691e-19	-2.22223	-1.34588	1.65114	-2.24892	-1.45442	1.54627	Fars2	phenylalanine-tRNA synthetase 2 (mitochondrial)	Mus musculus phenylalanine-tRNA synthetase 2 (mitochondrial) (Fars2), transcript variant 1, mRNA [NM_024274]	69955	NM_024274	ENSMUST00000021857
A_51_P394728|100087	2.53409e-17	4.57926e-19	3.3393	1.06869	-3.12466	3.24675	1.2358	-2.62725	Kti12	KTI12 homolog, chromatin associated	Mus musculus KTI12 homolog, chromatin associated (Kti12), mRNA [NM_029571]	100087	NM_029571	ENSMUST00000102738
A_55_P2065926|54194	2.53436e-17	4.58982e-19	-3.55205	-1.22018	2.9111	-3.73863	-1.45958	2.56145	Akap8l	A kinase (PRKA) anchor protein 8-like	Mus musculus A kinase (PRKA) anchor protein 8-like (Akap8l), mRNA [NM_017476]	54194	NM_017476	ENSMUST00000050214
A_52_P381846,A_55_P1996911,A_55_P1968789|19414	2.59769e-17	4.71482e-19	-2.23705	1.0285	2.3008	-2.44271	-1.12095	2.17913	Rasa3	RAS p21 protein activator 3	Mus musculus RAS p21 protein activator 3 (Rasa3), mRNA [NM_009025]///RAS p21 protein activator 3 [Source:MGI Symbol;Acc:MGI:1197013] [ENSMUST00000117551]	19414	NM_009025	ENSMUST00000137822///ENSMUST00000117551
A_51_P172532,A_55_P2162945|27045	2.59787e-17	4.72546e-19	-2.55295	-1.1521	2.21592	-2.72737	-1.17117	2.32876	Nit1	nitrilase 1	Mus musculus nitrilase 1 (Nit1), transcript variant 1, mRNA [NM_012049]///nitrilase 1 [Source:MGI Symbol;Acc:MGI:1350916] [ENSMUST00000111296]	27045	NM_012049	ENSMUST00000111295///ENSMUST00000111296
A_51_P341177|51793	2.67155e-17	4.87582e-19	-2.09015	-1.32315	1.57967	-1.93676	-1.30775	1.48098	Ddah2	dimethylarginine dimethylaminohydrolase 2	Mus musculus dimethylarginine dimethylaminohydrolase 2 (Ddah2), transcript variant 2, mRNA [NM_016765]	51793	NM_016765	ENSMUST00000007255
A_66_P139741	2.67155e-17	4.88071e-19	3.2854	1.25176	-2.62462	3.36425	1.41326	-2.38049			UI-M-BZ1-bdy-g-11-0-UI.s1 NIH_BMAP_MHI2_S1 Mus musculus cDNA clone UI-M-BZ1-bdy-g-11-0-UI 3'. [BE991772]
A_51_P166155,A_55_P2504045,A_55_P2172560|57441	2.70272e-17	4.96642e-19	-1.99624	1.04122	2.07852	-2.08406	1.01443	2.11413	Gmnn	geminin	Mus musculus geminin (Gmnn), mRNA [NM_020567]	57441	NM_020567	ENSMUST00000006898///ENSMUST00000176890
A_51_P389421|68636	2.70272e-17	4.97298e-19	-2.27538	1.07807	2.45301	-2.26405	1.0313	2.33492	Fahd1	fumarylacetoacetate hydrolase domain containing 1	Mus musculus fumarylacetoacetate hydrolase domain containing 1 (Fahd1), mRNA [NM_023480]	68636	NM_023480	ENSMUST00000049642
A_55_P2074337|18049	2.70272e-17	4.98058e-19	3.66552	-1.00269	-3.67537	4.42099	1.17624	-3.75859	Ngf	nerve growth factor	Mus musculus nerve growth factor (Ngf), transcript variant 1, mRNA [NM_013609]	18049	NM_013609	ENSMUST00000198644
A_52_P368855|228730	2.70272e-17	4.96754e-19	-3.54422	-1.33153	2.66175	-3.8202	-1.47817	2.58441	Kiz	kizuna centrosomal protein	Mus musculus kizuna centrosomal protein (Kiz), mRNA [NM_001033298]	228730	NM_001033298	ENSMUST00000135595
A_55_P2935276,A_55_P2720898,A_55_P2040121,A_55_P2040115,A_55_P2696638,A_55_P2509668|321022	2.70865e-17	5.01304e-19	2.3863	1.01496	-2.35113	2.62444	1.12752	-2.32762	Cdv3	carnitine deficiency-associated gene expressed in ventricle 3	carnitine deficiency-associated gene expressed in ventricle 3 [Source:MGI Symbol;Acc:MGI:2448759] [ENSMUST00000190127]///Mus musculus carnitine deficiency-associated gene expressed in ventricle 3 (Cdv3), transcript variant 2, mRNA [NM_175833]///Mus musculus carnitine deficiency-associated gene expressed in ventricle 3 (Cdv3), transcript variant 3, mRNA [NM_001134426]	321022	NM_175833///NM_001134426	ENSMUST00000190127///ENSMUST00000116517///ENSMUST00000169632///ENSMUST00000122007
A_52_P598|26356	2.70865e-17	5.00985e-19	-1.64679	-1.10332	1.49258	-1.69812	-1.04688	1.62208	Ing1	inhibitor of growth family, member 1	Mus musculus inhibitor of growth family, member 1 (Ing1), transcript variant 1, mRNA [NM_011919]	26356	NM_011919	ENSMUST00000210041
A_52_P556099|70645	2.74381e-17	5.089e-19	-4.20944	-1.04772	4.01773	-4.66636	-1.19024	3.92053	Oip5	Opa interacting protein 5	Mus musculus Opa interacting protein 5 (Oip5), mRNA [NM_001042653]	70645	NM_001042653	ENSMUST00000123818
A_30_P01019606	2.8059e-17	5.2153e-19	-2.8329	-1.14588	2.47226	-3.14113	-1.31695	2.38516			lincRNA:chr1:95871175-95886625 forward strand
A_55_P2110290,A_51_P222453|66039	2.81011e-17	5.23429e-19	-2.68527	-1.13174	2.37268	-2.82218	-1.0899	2.58939	Tmem254a	transmembrane protein 254a	Mus musculus transmembrane protein 254a (Tmem254a), transcript variant 1, mRNA [NM_026679]///Mus musculus transmembrane protein 254a (Tmem254a), transcript variant 2, mRNA [NM_025311]	66039	NM_026679///NM_025311	ENSMUST00000100806
A_55_P2731121|216049	2.83656e-17	5.29482e-19	3.07915	1.24927	-2.46476	3.16206	1.40443	-2.25149	Zfp365	zinc finger protein 365	Mus musculus zinc finger protein 365 (Zfp365), mRNA [NM_178679]	216049	NM_178679	ENSMUST00000132870
A_55_P2736794,A_66_P135742|22388	2.84528e-17	5.3224e-19	2.02128	-1.14064	-2.30556	2.04923	-1.09834	-2.25074	Wdr1	WD repeat domain 1	Mus musculus WD repeat domain 1 (Wdr1), mRNA [NM_011715]	22388	NM_011715	ENSMUST00000201260
A_51_P422636,A_51_P422629,A_55_P2018442|237336	2.88591e-17	5.40986e-19	1.67946	1.11903	-1.50082	1.83273	1.16887	-1.56795	Tbpl1	TATA box binding protein-like 1	Mus musculus TATA box binding protein-like 1 (Tbpl1), mRNA [NM_011603]///TATA box binding protein-like 1 [Source:MGI Symbol;Acc:MGI:1339946] [ENSMUST00000141569]	237336	NM_011603///XR_001779519	ENSMUST00000138022///ENSMUST00000095794///ENSMUST00000141569
A_55_P2148243,A_52_P71484,A_66_P138321,A_66_P124630,A_55_P2718052,A_51_P420955|57750	2.9713e-17	5.59239e-19	2.14084	1.13315	-1.88928	2.10287	1.28344	-1.63847	Wdr12	WD repeat domain 12	Mus musculus WD repeat domain 12 (Wdr12), transcript variant 2, mRNA [NM_021312]///WD repeat domain 12 [Source:MGI Symbol;Acc:MGI:1927241] [ENSMUST00000027173]///Mus musculus WD repeat domain 12 (Wdr12), transcript variant 1, mRNA [NM_001199060]///WD repeat domain 12 [Source:MGI Symbol;Acc:MGI:1927241] [ENSMUST00000147413]	57750	NM_021312///NM_001199060	ENSMUST00000143342///ENSMUST00000027173///ENSMUST00000122190///ENSMUST00000147413///ENSMUST00000117438
A_52_P381303,A_55_P2489999|272551	2.9713e-17	5.59354e-19	-2.12771	-1.15987	1.83443	-2.08456	-1.09213	1.90872	Gins2	GINS complex subunit 2 (Psf2 homolog)	Mus musculus GINS complex subunit 2 (Psf2 homolog) (Gins2), mRNA [NM_178856]	272551	NM_178856	ENSMUST00000126094///ENSMUST00000034278
A_55_P2641253,A_55_P2121945,A_66_P136076|231464	2.9841e-17	5.65319e-19	-1.71557	1.03265	1.77158	-1.86378	-1.09455	1.70278	Cnot6l	CCR4-NOT transcription complex, subunit 6-like	Mus musculus CCR4-NOT transcription complex, subunit 6-like (Cnot6l), transcript variant 3, mRNA [NM_001285511]	231464	NM_001285511	ENSMUST00000141383///ENSMUST00000122003///ENSMUST00000155901
A_51_P296198,A_55_P2716052,A_55_P2116111|244418	2.9841e-17	5.65133e-19	3.84913	1.01217	-3.80285	4.53346	1.23977	-3.65669	Prag1	PEAK1 related kinase activating pseudokinase 1	PEAK1 related kinase activating pseudokinase 1 [Source:MGI Symbol;Acc:MGI:1196223] [ENSMUST00000150295]///PEAK1 related kinase activating pseudokinase 1 [Source:MGI Symbol;Acc:MGI:1196223] [ENSMUST00000145386]///Mus musculus PEAK1 related kinase activating pseudokinase 1 (Prag1), mRNA [NM_172911]	244418	NM_172911	ENSMUST00000150295///ENSMUST00000145386///ENSMUST00000110492
A_55_P1999648,A_66_P132059|11520	2.9841e-17	5.63237e-19	2.5516	1.18832	-2.14723	2.71348	1.30742	-2.07545	Plin2	perilipin 2	Mus musculus perilipin 2 (Plin2), mRNA [NM_007408]	11520	NM_007408	ENSMUST00000138605///ENSMUST00000134094
A_51_P255142|53619	3.01321e-17	5.72029e-19	1.99056	1.18802	-1.67553	2.04359	1.28524	-1.59004	Blcap	bladder cancer associated protein	Mus musculus bladder cancer associated protein (Blcap), mRNA [NM_016916]	53619	NM_016916	ENSMUST00000088494
A_55_P2732021,A_55_P1969002|21386	3.06958e-17	5.8395e-19	1.96599	-1.18696	-2.33355	1.96303	-1.30228	-2.55642	Tbx3	T-box 3	Mus musculus T-box 3 (Tbx3), transcript variant 2, mRNA [NM_198052]	21386	NM_198052	ENSMUST00000079719
A_55_P2093634,A_65_P06772|68817	3.07077e-17	5.85397e-19	2.15022	1.16536	-1.8451	2.33337	1.23358	-1.89154	Ddi2	DNA-damage inducible protein 2	Mus musculus DNA-damage inducible protein 2 (Ddi2), mRNA [NM_001017966]///DNA-damage inducible protein 2 [Source:MGI Symbol;Acc:MGI:1917244] [ENSMUST00000102484]	68817	NM_001017966	ENSMUST00000105782///ENSMUST00000102484
A_66_P112853|13664	3.08578e-17	5.89484e-19	1.83836	-1.08735	-1.99895	2.0356	1.044	-1.94981	Eif1a	eukaryotic translation initiation factor 1A	Mus musculus eukaryotic translation initiation factor 1A (Eif1a), mRNA [NM_010120]	13664	NM_010120	ENSMUST00000168382
A_52_P527842|19707	3.15002e-17	6.04257e-19	2.43114	1.09668	-2.21681	2.54316	-1.01105	-2.57126	Reps1	RalBP1 associated Eps domain containing protein	Mus musculus RalBP1 associated Eps domain containing protein (Reps1), transcript variant 1, mRNA [NM_009048]	19707	NM_009048	ENSMUST00000144287
A_55_P2820752|11852	3.15002e-17	6.0382e-19	-2.30229	-4.74512	-2.06105	-2.42976	-4.94693	-2.03598	Rhob	ras homolog family member B	Mus musculus ras homolog family member B (Rhob), mRNA [NM_007483]	11852	NM_007483	ENSMUST00000067384
A_55_P2014882,A_52_P572476|241452	3.21695e-17	6.18373e-19	2.42636	-1.23534	-2.99737	2.67593	-1.22802	-3.2861	Dhrs9	dehydrogenase/reductase (SDR family) member 9	Mus musculus dehydrogenase/reductase (SDR family) member 9 (Dhrs9), mRNA [NM_175512]///dehydrogenase/reductase (SDR family) member 9 [Source:MGI Symbol;Acc:MGI:2442798] [ENSMUST00000063690]	241452	NM_175512	ENSMUST00000063690
A_55_P2917114,A_52_P53906,A_65_P18532|12444	3.22911e-17	6.21993e-19	1.41774	1.09272	-1.29745	1.61784	1.14029	-1.41879	Ccnd2	cyclin D2	Mus musculus cyclin D2 (Ccnd2), mRNA [NM_009829]///cyclin D2 [Source:MGI Symbol;Acc:MGI:88314] [ENSMUST00000000188]	12444	NM_009829///XM_006505459	ENSMUST00000000188///ENSMUST00000201902
A_55_P1960053|74096	3.24973e-17	6.27256e-19	-2.76379	-1.13795	2.42875	-2.81966	-1.14507	2.46244	Hvcn1	hydrogen voltage-gated channel 1	Mus musculus hydrogen voltage-gated channel 1 (Hvcn1), transcript variant 1, mRNA [NM_001042489]	74096	NM_001042489	ENSMUST00000072602
A_51_P375698,A_52_P683306|225358	3.26678e-17	6.31845e-19	3.37503	1.16679	-2.89258	3.26752	1.04964	-3.11299	Fam13b	family with sequence similarity 13, member B	PREDICTED: Mus musculus family with sequence similarity 13, member B (Fam13b), transcript variant X2, mRNA [XM_006525849]///Mus musculus family with sequence similarity 13, member B (Fam13b), mRNA [NM_146084]	225358	XM_006525849///NM_146084	ENSMUST00000040506
A_55_P2729313,A_66_P122758,A_51_P409132|104662	3.39168e-17	6.61391e-19	3.13675	1.14703	-2.73467	3.116	1.27686	-2.44036	Tsr1	TSR1 20S rRNA accumulation	Mus musculus TSR1 20S rRNA accumulation (Tsr1), mRNA [NM_177325]	104662	NM_177325	ENSMUST00000155785///ENSMUST00000045807///ENSMUST00000128230
A_55_P2131190,A_51_P475378|67856	3.39168e-17	6.60249e-19	-2.81643	1.05211	2.96319	-2.72465	-1.0083	2.70222	Echdc3	enoyl Coenzyme A hydratase domain containing 3	enoyl Coenzyme A hydratase domain containing 3 [Source:MGI Symbol;Acc:MGI:1915106] [ENSMUST00000114941]///Mus musculus enoyl Coenzyme A hydratase domain containing 3 (Echdc3), mRNA [NM_024208]	67856	NM_024208	ENSMUST00000114941///ENSMUST00000042658
A_51_P213359|15117	3.39168e-17	6.60458e-19	3.08846	1.07766	-2.86589	2.90325	-1.1256	-3.26789	Has2	hyaluronan synthase 2	Mus musculus hyaluronan synthase 2 (Has2), mRNA [NM_008216]	15117	NM_008216	ENSMUST00000050544
A_65_P12292|414801	3.39168e-17	6.59602e-19	2.5666	1.07139	-2.39557	2.75099	1.07825	-2.55134	Itprip	inositol 1,4,5-triphosphate receptor interacting protein	Mus musculus inositol 1,4,5-triphosphate receptor interacting protein (Itprip), mRNA [NM_001001738]	414801	NM_001001738	ENSMUST00000095998
A_66_P131163|76608	3.40344e-17	6.65036e-19	-2.16343	-1.14534	1.8889	-2.49101	-1.20718	2.0635	Hectd3	HECT domain E3 ubiquitin protein ligase 3	Mus musculus HECT domain containing 3 (Hectd3), mRNA [NM_175244]	76608	NM_175244	ENSMUST00000050067
A_51_P131942,A_65_P08864|69740	3.40699e-17	6.67082e-19	2.04037	1.01061	-2.01895	2.03205	1.04473	-1.94505	Dph5	diphthamide biosynthesis 5	Mus musculus diphthamide biosynthesis 5 (Dph5), mRNA [NM_027193]///diphthamide biosynthesis 5 [Source:MGI Symbol;Acc:MGI:1916990] [ENSMUST00000106505]	69740	NM_027193	ENSMUST00000189799///ENSMUST00000106505
A_51_P340816|16351	3.50056e-17	6.86794e-19	-2.31947	1.15886	2.68794	-2.4836	1.0705	2.65869	Ipp	IAP promoted placental gene	Mus musculus IAP promoted placental gene (Ipp), mRNA [NM_008389]	16351	NM_008389	ENSMUST00000106479
A_55_P2101696|14686	3.52159e-17	6.92319e-19	-2.99947	-1.24644	2.40642	-2.88048	-1.26151	2.28336	Gnat2	guanine nucleotide binding protein, alpha transducing 2	Mus musculus guanine nucleotide binding protein, alpha transducing 2 (Gnat2), mRNA [NM_008141]	14686	NM_008141	ENSMUST00000130013
A_55_P2488554,A_51_P391764|494448	3.53592e-17	6.9654e-19	-1.92616	-1.01931	1.88968	-2.11176	1.02501	2.16457	Cbx6	chromobox 6	Mus musculus chromobox 6 (Cbx6), mRNA [NM_028763]	494448	NM_028763	ENSMUST00000109627///ENSMUST00000109625
A_65_P12528,A_51_P428529|114643	3.59212e-17	7.09036e-19	-7.11098	-1.56937	4.5311	-8.23951	-1.96132	4.20101	Oas1c	2'-5' oligoadenylate synthetase 1C	Mus musculus 2'-5' oligoadenylate synthetase 1C (Oas1c), mRNA [NM_033541]	114643	NM_033541	ENSMUST00000130045///ENSMUST00000117193
A_51_P198045,A_55_P1998164,A_55_P2914721|100972	3.68432e-17	7.28698e-19	-2.30164	-1.15598	1.99107	-2.29625	-1.18296	1.94111	Rab28	RAB28, member RAS oncogene family	Mus musculus RAB28, member RAS oncogene family (Rab28), transcript variant 3, mRNA [NM_001310590]///Mus musculus RAB28, member RAS oncogene family (Rab28), transcript variant 1, mRNA [NM_027295]	100972	NM_001310590///NM_027295	ENSMUST00000202913///ENSMUST00000200702
A_66_P124173,A_51_P165704|17220	3.7816e-17	7.49441e-19	-1.76425	1.03344	1.82326	-1.7076	1.09839	1.87561	Mcm7	minichromosome maintenance complex component 7	Mus musculus minichromosome maintenance complex component 7 (Mcm7), mRNA [NM_008568]	17220	NM_008568	ENSMUST00000148094///ENSMUST00000148879
A_51_P485791,A_55_P2792294|13121	3.80551e-17	7.55691e-19	1.35817	-1.90166	-2.58278	1.50576	-2.13179	-3.20996	Cyp51	cytochrome P450, family 51	Mus musculus cytochrome P450, family 51 (Cyp51), mRNA [NM_020010]	13121	NM_020010	ENSMUST00000129448///ENSMUST00000001507
A_55_P2018076,A_66_P104323|69710	3.85585e-17	7.67219e-19	-2.38123	-1.48918	1.59902	-2.43756	-1.44365	1.68847	Arap1	ArfGAP with RhoGAP domain, ankyrin repeat and PH domain 1	Mus musculus ArfGAP with RhoGAP domain, ankyrin repeat and PH domain 1 (Arap1), transcript variant 3, mRNA [NM_001040111]	69710	NM_001040111	ENSMUST00000084896///ENSMUST00000124637
A_55_P1961436,A_66_P105791|18750	3.86285e-17	7.70146e-19	1.85557	-1.0536	-1.95503	1.67617	-1.15685	-1.93908	Prkca	protein kinase C, alpha	Mus musculus protein kinase C, alpha (Prkca), mRNA [NM_011101]	18750	NM_011101	ENSMUST00000100302///ENSMUST00000059595
A_55_P2647945,A_55_P2015520,A_55_P2719039,A_55_P2930326,A_55_P2719034|101476	3.90143e-17	7.79387e-19	2.45516	1.18127	-2.0784	2.278	1.13527	-2.00658	Plekha1	pleckstrin homology domain containing, family A (phosphoinositide binding specific) member 1	Mus musculus pleckstrin homology domain containing, family A (phosphoinositide binding specific) member 1 (Plekha1), transcript variant 1, mRNA [NM_133942]///pleckstrin homology domain containing, family A (phosphoinositide binding specific) member 1 [Source:MGI Symbol;Acc:MGI:2442213] [ENSMUST00000154282]///Mus musculus pleckstrin homology domain containing, family A (phosphoinositide binding sp…	101476	NM_133942///NM_001346515	ENSMUST00000149029///ENSMUST00000048180///ENSMUST00000154282///ENSMUST00000075181///ENSMUST00000148513
A_55_P2717993,A_52_P232830,A_52_P194250|23871	3.92443e-17	7.8554e-19	2.74783	1.4718	-1.86698	2.93179	1.28926	-2.274	Ets1	E26 avian leukemia oncogene 1, 5' domain	E26 avian leukemia oncogene 1, 5' domain [Source:MGI Symbol;Acc:MGI:95455] [ENSMUST00000183879]///Mus musculus E26 avian leukemia oncogene 1, 5' domain (Ets1), transcript variant 1, mRNA [NM_011808]	23871	NM_011808	ENSMUST00000183879///ENSMUST00000184364///ENSMUST00000034534
A_55_P2000182|330064	3.92607e-17	7.87429e-19	3.43466	1.1559	-2.97142	3.39705	1.3805	-2.46074	Slc5a6	solute carrier family 5 (sodium-dependent vitamin transporter), member 6	Mus musculus solute carrier family 5 (sodium-dependent vitamin transporter), member 6 (Slc5a6), transcript variant 1, mRNA [NM_001177621]	330064	NM_001177621	ENSMUST00000114668
A_55_P1978050,A_52_P248250|74268	3.97208e-17	7.98234e-19	2.18836	1.11312	-1.96597	2.04277	1.3018	-1.56919	Aven	apoptosis, caspase activation inhibitor	Mus musculus apoptosis, caspase activation inhibitor (Aven), transcript variant 1, mRNA [NM_028844]	74268	NM_028844	ENSMUST00000003705///ENSMUST00000127894
A_55_P2744518,A_51_P142046|66431	3.98668e-17	8.02751e-19	-3.18671	-1.29242	2.46569	-3.14588	-1.3689	2.2981	Oxld1	oxidoreductase like domain containing 1	Mus musculus oxidoreductase like domain containing 1 (Oxld1), mRNA [NM_025560]	66431	NM_025560	ENSMUST00000044007
A_55_P2165011,A_55_P2033917|171167	4.00102e-17	8.07228e-19	-3.41478	-1.09603	3.11558	-3.91316	-1.20258	3.25396	Fut10	fucosyltransferase 10	Mus musculus fucosyltransferase 10 (Fut10), transcript variant 3, mRNA [NM_134161]///Mus musculus fucosyltransferase 10 (Fut10), transcript variant 1, mRNA [NM_001286422]	171167	NM_134161///NM_001286422	ENSMUST00000161788///ENSMUST00000110527
A_66_P126334,A_51_P360165|12452	4.03629e-17	8.15946e-19	-4.84508	1.48221	7.18142	-5.04252	1.08561	5.47423	Ccng2	cyclin G2	Mus musculus cyclin G2 (Ccng2), mRNA [NM_007635]	12452	NM_007635	ENSMUST00000149329///ENSMUST00000121127
A_55_P2917066|14760	4.04894e-17	8.20111e-19	-3.18772	-1.26715	2.51566	-3.22671	-1.4701	2.1949	Gpr19	G protein-coupled receptor 19	Mus musculus G protein-coupled receptor 19 (Gpr19), transcript variant 2, mRNA [NM_001167700]	14760	NM_001167700	ENSMUST00000111932
A_52_P281145|242553	4.08523e-17	8.29085e-19	-10.7669	-1.73203	6.21632	-12.2021	-2.21126	5.51819	Kank4	KN motif and ankyrin repeat domains 4	Mus musculus KN motif and ankyrin repeat domains 4 (Kank4), mRNA [NM_172872]	242553	NM_172872	ENSMUST00000102790
A_55_P2071286,A_51_P416408|353499	4.14971e-17	8.4382e-19	-3.06569	-1.34402	2.28099	-2.9197	-1.46763	1.9894	Tmc4	transmembrane channel-like gene family 4	Mus musculus transmembrane channel-like gene family 4 (Tmc4), mRNA [NM_181820]	353499	NM_181820	ENSMUST00000121743///ENSMUST00000136678
A_55_P1952720,A_55_P2924306|70382	4.20852e-17	8.57449e-19	-2.86063	-1.33644	2.14049	-2.96486	-1.44694	2.04905	Kctd2	potassium channel tetramerisation domain containing 2	Mus musculus potassium channel tetramerisation domain containing 2 (Kctd2), mRNA [NM_183285]///potassium channel tetramerisation domain containing 2 [Source:MGI Symbol;Acc:MGI:1917632] [ENSMUST00000123345]	70382	NM_183285///XM_006534166	ENSMUST00000106533///ENSMUST00000123345
A_65_P06678,A_51_P209372,A_66_P104901|66234	4.21823e-17	8.61103e-19	1.20492	-1.71075	-2.06131	1.32182	-2.04261	-2.69996	Msmo1	methylsterol monoxygenase 1	methylsterol monoxygenase 1 [Source:MGI Symbol;Acc:MGI:1913484] [ENSMUST00000135943]///Mus musculus methylsterol monoxygenase 1 (Msmo1), mRNA [NM_025436]	66234	NM_025436	ENSMUST00000135943///ENSMUST00000034015///ENSMUST00000140861
A_30_P01029746	4.27156e-17	8.73686e-19	5.19958	3.72683	-1.39518	5.07245	2.66662	-1.9022			lincRNA:chr14:115443612-115445950 forward strand
A_51_P326566,A_55_P2507300,A_55_P1971639,A_55_P2631664|230234	4.30446e-17	8.82125e-19	2.20128	1.20465	-1.82732	2.06041	1.20067	-1.71605	Fam206a	family with sequence similarity 206, member A	family with sequence similarity 206, member A [Source:MGI Symbol;Acc:MGI:2677850] [ENSMUST00000152638]///Mus musculus family with sequence similarity 206, member A (Fam206a), mRNA [NM_001081420]	230234	NM_001081420	ENSMUST00000152638///ENSMUST00000131520///ENSMUST00000147763
A_66_P139208,A_55_P2000553|102857	4.32516e-17	8.88085e-19	2.19858	1.22298	-1.79772	2.06297	1.19876	-1.72092	Slc6a8	solute carrier family 6 (neurotransmitter transporter, creatine), member 8	Mus musculus solute carrier family 6 (neurotransmitter transporter, creatine), member 8 (Slc6a8), transcript variant 1, mRNA [NM_133987]	102857	NM_133987	ENSMUST00000170614///ENSMUST00000114464
A_52_P489295|11504	4.3586e-17	8.96682e-19	-5.55269	-3.34495	1.66002	-5.70274	-4.42565	1.28856	Adamts1	a disintegrin-like and metallopeptidase (reprolysin type) with thrombospondin type 1 motif, 1	Mus musculus a disintegrin-like and metallopeptidase (reprolysin type) with thrombospondin type 1 motif, 1 (Adamts1), mRNA [NM_009621]	11504	NM_009621	ENSMUST00000023610
A_55_P2817039,A_55_P2119430|22224	4.3814e-17	9.03113e-19	1.81304	1.01504	-1.78617	1.88231	1.14503	-1.64389	Usp10	ubiquitin specific peptidase 10	ubiquitin specific peptidase 10 [Source:MGI Symbol;Acc:MGI:894652] [ENSMUST00000148767]///Mus musculus ubiquitin specific peptidase 10 (Usp10), transcript variant 1, mRNA [NM_009462]	22224	NM_009462	ENSMUST00000148767///ENSMUST00000139648
A_51_P502082|20133	4.41594e-17	9.11985e-19	-1.65762	-1.06756	1.55272	-1.60325	-1.01899	1.57338	Rrm1	ribonucleotide reductase M1	Mus musculus ribonucleotide reductase M1 (Rrm1), mRNA [NM_009103]	20133	NM_009103	ENSMUST00000033283
A_51_P126437|13803	4.43035e-17	9.16722e-19	2.52934	1.17432	-2.15388	2.62318	1.13417	-2.31287	Enc1	ectodermal-neural cortex 1	Mus musculus ectodermal-neural cortex 1 (Enc1), mRNA [NM_007930]	13803	NM_007930	ENSMUST00000041623
A_51_P313566,A_52_P137765,A_65_P12904|16905	4.50401e-17	9.33751e-19	2.47437	-1.13472	-2.80772	2.76385	1.00743	-2.74346	Lmna	lamin A	Mus musculus lamin A (Lmna), transcript variant 2, mRNA [NM_019390]///Mus musculus lamin A (Lmna), transcript variant 1, mRNA [NM_001002011]	16905	NM_019390///NM_001002011	ENSMUST00000036252///ENSMUST00000029699
A_52_P345247|224481	4.5044e-17	9.35622e-19	-3.77112	-1.14617	3.29019	-4.49175	-1.22986	3.65225	Tfb1m	transcription factor B1, mitochondrial	Mus musculus transcription factor B1, mitochondrial (Tfb1m), mRNA [NM_146074]	224481	NM_146074	ENSMUST00000041003
A_52_P319438|654824	4.50603e-17	9.37749e-19	3.16297	1.9529	-1.61963	3.36431	1.83082	-1.8376	Ankrd37	ankyrin repeat domain 37	Mus musculus ankyrin repeat domain 37 (Ankrd37), mRNA [NM_001039562]	654824	NM_001039562	ENSMUST00000144525
A_51_P172131|52829	4.55663e-17	9.5009e-19	1.94939	1.26748	-1.538	2.03461	1.27484	-1.59597	Lurap1l	leucine rich adaptor protein 1-like	Mus musculus leucine rich adaptor protein 1-like (Lurap1l), mRNA [NM_026821]	52829	NM_026821	ENSMUST00000055922
A_55_P2504780,A_51_P407417,A_51_P479390,A_55_P2717822|101401	4.75779e-17	9.93922e-19	-2.96183	-1.05728	2.80136	-3.25905	-1.26366	2.57905	Adamts9	a disintegrin-like and metallopeptidase (reprolysin type) with thrombospondin type 1 motif, 9	Mus musculus a disintegrin-like and metallopeptidase (reprolysin type) with thrombospondin type 1 motif, 9 (Adamts9), mRNA [NM_175314]///a disintegrin-like and metallopeptidase (reprolysin type) with thrombospondin type 1 motif, 9 [Source:MGI Symbol;Acc:MGI:1916320] [ENSMUST00000125490]///a disintegrin-like and metallopeptidase (reprolysin type) with thrombospondin type 1 motif, 9 [Source:MGI Sym…	101401	NM_175314	ENSMUST00000167391///ENSMUST00000125490///ENSMUST00000136751///ENSMUST00000130314
A_55_P2139753,A_55_P2718152|76901	4.79794e-17	1.00421e-18	-2.13591	1.16225	2.48245	-2.21565	1.26145	2.79493	Jade2	jade family PHD finger 2	Mus musculus jade family PHD finger 2 (Jade2), mRNA [NM_199299]///jade family PHD finger 2 [Source:MGI Symbol;Acc:MGI:1924151] [ENSMUST00000151277]	76901	NM_199299	ENSMUST00000020655///ENSMUST00000151277
A_51_P411909|68346	4.87121e-17	1.02259e-18	-3.24701	-1.32593	2.44886	-3.26096	-1.53905	2.11881	Sirt5	sirtuin 5	Mus musculus sirtuin 5 (Sirt5), mRNA [NM_178848]	68346	NM_178848	ENSMUST00000066804
A_52_P493534,A_55_P2094520,A_51_P231587|269233	4.87121e-17	1.02342e-18	3.02524	1.53296	-1.97347	2.96872	1.53308	-1.93644	Fam171a1	family with sequence similarity 171, member A1	Mus musculus family with sequence similarity 171, member A1 (Fam171a1), transcript variant 3, mRNA [NM_001347067]	269233	NM_001347067	ENSMUST00000072955///ENSMUST00000115099
A_51_P195783,A_55_P2803316|234258	4.88321e-17	1.02788e-18	-3.83421	1.12886	4.3283	-4.23126	-1.12224	3.77038	Neil3	nei like 3 (E. coli)	nei like 3 (E. coli) [Source:MGI Symbol;Acc:MGI:2384588] [ENSMUST00000130656]///Mus musculus nei like 3 (E. coli) (Neil3), mRNA [NM_146208]	234258	NM_146208	ENSMUST00000130656///ENSMUST00000047768
A_51_P284426,A_55_P2715396|78617	4.97217e-17	1.04858e-18	-9.79247	-1.12976	8.66771	-10.5211	-1.52219	6.91186	Cstad	CSA-conditional, T cell activation-dependent protein	Mus musculus CSA-conditional, T cell activation-dependent protein (Cstad), mRNA [NM_030137]///CSA-conditional, T cell activation-dependent protein [Source:MGI Symbol;Acc:MGI:1925867] [ENSMUST00000129719]	78617	NM_030137	ENSMUST00000102853///ENSMUST00000129719
A_55_P2002702,A_55_P2112997,A_51_P235291,A_66_P120928|66942	5.01397e-17	1.05939e-18	2.39062	1.28663	-1.85805	2.46586	1.44424	-1.70737	Ddx18	DEAD (Asp-Glu-Ala-Asp) box polypeptide 18	Mus musculus DEAD (Asp-Glu-Ala-Asp) box polypeptide 18 (Ddx18), mRNA [NM_025860]	66942	NM_025860	ENSMUST00000001724///ENSMUST00000148809///ENSMUST00000134417
A_55_P2308283|100504104	5.38457e-17	1.13983e-18	3.53735	1.25903	-2.80957	3.73665	1.30947	-2.85356	Gm16062	predicted gene 16062	Mus musculus predicted gene 16062 (Gm16062), long non-coding RNA [NR_045686]	100504104	NR_045686
A_66_P103471,A_55_P2139640,A_51_P472323|50755	5.45423e-17	1.15674e-18	-2.77363	-1.14959	2.41271	-2.92229	-1.15241	2.53581	Fbxo18	F-box protein 18	F-box protein 18 [Source:MGI Symbol;Acc:MGI:1354699] [ENSMUST00000123717]///Mus musculus F-box protein 18 (Fbxo18), transcript variant 2, mRNA [NM_001348234]///Mus musculus F-box protein 18 (Fbxo18), transcript variant 1, mRNA [NM_015792]	50755	NM_001348234///NM_015792	ENSMUST00000123717///ENSMUST00000155604///ENSMUST00000071564
A_55_P2620402,A_51_P329319,A_55_P2167035,A_51_P329322|66361	5.47209e-17	1.1627e-18	-3.09976	-1.1127	2.7858	-3.18528	-1.33531	2.38542	Zfand1	zinc finger, AN1-type domain 1	zinc finger, AN1-type domain 1 [Source:MGI Symbol;Acc:MGI:1913611] [ENSMUST00000156414]///Mus musculus zinc finger, AN1-type domain 1 (Zfand1), transcript variant 1, mRNA [NM_025512]///Mus musculus zinc finger, AN1-type domain 1 (Zfand1), transcript variant 3, mRNA [NM_001331014]	66361	NM_025512///NM_001331014	ENSMUST00000156414///ENSMUST00000140634///ENSMUST00000108377///ENSMUST00000125734
A_55_P1987331|18775	5.50668e-17	1.17224e-18	6.15439	2.07221	-2.96997	6.69411	2.56541	-2.60937	Prl3d1	prolactin family 3, subfamily d, member 1	Mus musculus prolactin family 3, subfamily d, member 1 (Prl3d1), transcript variant 1, mRNA [NM_001205322]	18775	NM_001205322	ENSMUST00000080755
A_52_P501707,A_55_P2252105|70957	5.53098e-17	1.18654e-18	-9.89078	-1.39675	7.08131	-10.1964	-1.64414	6.20165	Stamos	signal transducing adaptor molecule (SH3 domain and ITAM motif) 1, opposite strand	Mus musculus signal transducing adaptor molecule (SH3 domain and ITAM motif) 1, opposite strand (Stamos), long non-coding RNA [NR_038162]///DAY20_16_G10.x1 FH DAY20 Mus musculus cDNA clone DAY20_16_G10, mRNA sequence [DV046984]	70957	NR_038162
A_66_P127432,A_51_P441942|21843	5.53098e-17	1.18012e-18	1.46461	1.24092	-1.18026	1.42703	1.15762	-1.23274	Tial1	Tia1 cytotoxic granule-associated RNA binding protein-like 1	Mus musculus Tia1 cytotoxic granule-associated RNA binding protein-like 1 (Tial1), transcript variant 3, mRNA [NM_001347641]///Mus musculus Tia1 cytotoxic granule-associated RNA binding protein-like 1 (Tial1), transcript variant 1, mRNA [NM_009383]	21843	NM_001347641///NM_009383	ENSMUST00000141126///ENSMUST00000106226
A_55_P2721930,A_52_P576041|19731	5.53098e-17	1.1858e-18	-2.50821	-1.35037	1.85742	-2.74077	-1.49733	1.83044	Rgl1	ral guanine nucleotide dissociation stimulator,-like 1	ral guanine nucleotide dissociation stimulator,-like 1 [Source:MGI Symbol;Acc:MGI:107484] [ENSMUST00000188395]///Mus musculus ral guanine nucleotide dissociation stimulator,-like 1 (Rgl1), transcript variant 4, mRNA [NM_016846]	19731	NM_016846	ENSMUST00000188395///ENSMUST00000027760
A_30_P01026095	5.53098e-17	1.18605e-18	-2.45889	-1.29704	1.89577	-2.39251	-1.31611	1.81787			lincRNA:chr7:128341797-128414692 reverse strand
A_51_P156438|70556	5.53098e-17	1.19059e-18	3.12202	1.40037	-2.22944	3.37874	1.60514	-2.10495	Slc25a33	solute carrier family 25, member 33	Mus musculus solute carrier family 25, member 33 (Slc25a33), mRNA [NM_027460]	70556	NM_027460	ENSMUST00000105686
A_55_P2488624|74153	5.53098e-17	1.18912e-18	-3.00186	-1.32819	2.26011	-3.36587	-1.70775	1.97094	Uba7	ubiquitin-like modifier activating enzyme 7	Mus musculus ubiquitin-like modifier activating enzyme 7 (Uba7), mRNA [NM_023738]	74153	NM_023738	ENSMUST00000176858
A_55_P2744037,A_66_P105862,A_52_P571938|68865	5.56356e-17	1.19982e-18	2.51484	1.41487	-1.77743	2.70567	1.6462	-1.64358	Arv1	ARV1 homolog, fatty acid homeostasis modulator	Mus musculus ARV1 homolog, fatty acid homeostasis modulator (Arv1), mRNA [NM_026855]	68865	NM_026855	ENSMUST00000212036///ENSMUST00000034463
A_55_P2743440,A_55_P2004797|57752	5.58399e-17	1.20644e-18	2.18675	1.12326	-1.94679	2.3976	1.07633	-2.22756	Tacc2	transforming, acidic coiled-coil containing protein 2	Mus musculus transforming, acidic coiled-coil containing protein 2 (Tacc2), transcript variant 3, mRNA [NM_001004468]	57752	NM_001004468	ENSMUST00000207789///ENSMUST00000208743
A_55_P2914662,A_55_P2924285,A_55_P2063216|56405	5.67127e-17	1.22805e-18	2.25475	1.02705	-2.19538	2.30299	1.09377	-2.10555	Dusp14	dual specificity phosphatase 14	Mus musculus dual specificity phosphatase 14 (Dusp14), mRNA [NM_019819]///dual specificity phosphatase 14 [Source:MGI Symbol;Acc:MGI:1927168] [ENSMUST00000138208]	56405	NM_019819///XM_006533796	ENSMUST00000164891///ENSMUST00000138208///ENSMUST00000108101
A_55_P2105220,A_55_P2518305|100900	5.67127e-17	1.23141e-18	-2.92905	-1.33464	2.19464	-2.93167	-1.57005	1.86725	Hscb	HscB iron-sulfur cluster co-chaperone	Mus musculus HscB iron-sulfur cluster co-chaperone (Hscb), mRNA [NM_153571]	100900	NM_153571	ENSMUST00000122921///ENSMUST00000145318
A_55_P2744201,A_51_P192429|57815	5.67127e-17	1.23205e-18	2.60059	1.23001	-2.11428	2.5734	1.32492	-1.94231	Spata5	spermatogenesis associated 5	Mus musculus spermatogenesis associated 5 (Spata5), transcript variant 3, mRNA [NM_001310473]///Mus musculus spermatogenesis associated 5 (Spata5), transcript variant 2, mRNA [NM_021343]	57815	NM_001310473///NM_021343	ENSMUST00000132958
A_55_P2714414,A_51_P348494|20229	5.70431e-17	1.2415e-18	2.49981	1.0335	-2.41879	2.63539	-1.1624	-3.06338	Sat1	spermidine/spermine N1-acetyl transferase 1	Mus musculus spermidine/spermine N1-acetyl transferase 1 (Sat1), transcript variant 2, mRNA [NM_001291865]///Mus musculus spermidine/spermine N1-acetyl transferase 1 (Sat1), transcript variant 1, mRNA [NM_009121]	20229	NM_001291865///NM_009121	ENSMUST00000134855///ENSMUST00000123337
A_52_P352277,A_55_P2101001|17127	5.77148e-17	1.25841e-18	1.71699	1.14088	-1.50497	1.8256	1.11362	-1.63935	Smad3	SMAD family member 3	Mus musculus SMAD family member 3 (Smad3), mRNA [NM_016769]	17127	NM_016769	ENSMUST00000034973
A_55_P2599891,A_55_P2714539,A_51_P178735,A_51_P191274|227095	5.78813e-17	1.26433e-18	-2.24407	-1.15016	1.95108	-2.33521	-1.2207	1.91302	Hibch	3-hydroxyisobutyryl-Coenzyme A hydrolase	Mus musculus 3-hydroxyisobutyryl-Coenzyme A hydrolase (Hibch), mRNA [NM_146108]///3-hydroxyisobutyryl-Coenzyme A hydrolase [Source:MGI Symbol;Acc:MGI:1923792] [ENSMUST00000186922]///3-hydroxyisobutyryl-Coenzyme A hydrolase [Source:MGI Symbol;Acc:MGI:1923792] [ENSMUST00000161125]	227095	NM_146108	ENSMUST00000162609///ENSMUST00000186922///ENSMUST00000159352///ENSMUST00000161125
A_55_P2069714,A_51_P119077,A_66_P110606|18412	5.81987e-17	1.27358e-18	2.05863	-1.03584	-2.13242	2.38507	1.01099	-2.35915	Sqstm1	sequestosome 1	Mus musculus sequestosome 1 (Sqstm1), transcript variant 1, mRNA [NM_011018]///sequestosome 1 [Source:MGI Symbol;Acc:MGI:107931] [ENSMUST00000015981]	18412	NM_011018	ENSMUST00000147846///ENSMUST00000136936///ENSMUST00000015981
A_55_P2060547	5.84518e-17	1.28144e-18	11.4483	-1.02277	-11.709	8.34647	1.19543	-6.98199			predicted gene 7897 [Source:MGI Symbol;Acc:MGI:3648011] [ENSMUST00000193981]			ENSMUST00000193981
A_55_P2931347,A_55_P2176963,A_55_P2003513|15505	5.93342e-17	1.30314e-18	2.39254	1.55957	-1.5341	2.2372	1.76561	-1.2671	Hsph1	heat shock 105kDa/110kDa protein 1	Mus musculus heat shock 105kDa/110kDa protein 1 (Hsph1), transcript variant 2, mRNA [NM_001347534]///Mus musculus heat shock 105kDa/110kDa protein 1 (Hsph1), transcript variant 1, mRNA [NM_013559]	15505	NM_001347534///NM_013559	ENSMUST00000200825///ENSMUST00000074846///ENSMUST00000201877
A_55_P2872587|101358	5.96376e-17	1.31217e-18	1.8796	1.29824	-1.44781	1.93475	1.29797	-1.4906	Fbxl14	F-box and leucine-rich repeat protein 14	Mus musculus F-box and leucine-rich repeat protein 14 (Fbxl14), mRNA [NM_133940]	101358	NM_133940	ENSMUST00000032094
A_55_P1975305	6.00104e-17	1.32276e-18	2.31096	1.2252	-1.88618	2.40768	1.26618	-1.90153
A_55_P2486899,A_66_P121077|71242	6.15028e-17	1.3581e-18	-2.77595	-1.27192	2.18249	-2.51868	-1.25577	2.00568	Spata24	spermatogenesis associated 24	Mus musculus spermatogenesis associated 24 (Spata24), transcript variant 1, mRNA [NM_027733]///Mus musculus spermatogenesis associated 24 (Spata24), transcript variant 2, mRNA [NM_029485]	71242	NM_027733///NM_029485	ENSMUST00000096573///ENSMUST00000025209
A_55_P2183383,A_55_P2720505,A_55_P2183378,A_52_P253557|74479	6.31133e-17	1.39617e-18	3.87639	1.26336	-3.06831	3.77244	1.56428	-2.41162	Snx11	sorting nexin 11	Mus musculus sorting nexin 11 (Snx11), mRNA [NM_028965]///sorting nexin 11 [Source:MGI Symbol;Acc:MGI:1921729] [ENSMUST00000136799]///sorting nexin 11 [Source:MGI Symbol;Acc:MGI:1921729] [ENSMUST00000132354]	74479	NM_028965	ENSMUST00000127375///ENSMUST00000136799///ENSMUST00000107661///ENSMUST00000132354
A_55_P1973178|71909	6.33582e-17	1.4041e-18	-2.50604	1.06945	2.68008	-2.47017	1.11465	2.75338	Haus5	HAUS augmin-like complex, subunit 5	Mus musculus HAUS augmin-like complex, subunit 5 (Haus5), mRNA [NM_027999]	71909	NM_027999	ENSMUST00000019697
A_51_P285446,A_66_P100721|16881	6.33897e-17	1.40732e-18	-2.20117	-1.06307	2.07058	-2.12322	-1.02556	2.0703	Lig1	ligase I, DNA, ATP-dependent	Mus musculus ligase I, DNA, ATP-dependent (Lig1), transcript variant 2, mRNA [NM_010715]///Mus musculus ligase I, DNA, ATP-dependent (Lig1), transcript variant 3, mRNA [NM_001199310]	16881	NM_010715///NM_001199310	ENSMUST00000131294///ENSMUST00000123025
A_51_P164420,A_55_P2737264|66143	6.56092e-17	1.4592e-18	2.90049	1.35361	-2.14278	3.17903	1.2292	-2.58626	Eef1e1	eukaryotic translation elongation factor 1 epsilon 1	Mus musculus eukaryotic translation elongation factor 1 epsilon 1 (Eef1e1), mRNA [NM_025380]///MCA3_MOUSE (Q9D1M4) Eukaryotic translation elongation factor 1 epsilon-1 (Multisynthetase complex auxiliary component p18) (Elongation factor p18), partial (55%) [TC1689913]	66143	NM_025380	ENSMUST00000001757
A_52_P499879,A_55_P1988708|14874	6.58458e-17	1.46827e-18	-2.5853	-1.35076	1.91395	-2.44889	-1.41579	1.72971	Gstz1	glutathione transferase zeta 1 (maleylacetoacetate isomerase)	Mus musculus glutathione transferase zeta 1 (maleylacetoacetate isomerase) (Gstz1), transcript variant 1, mRNA [NM_010363]///Mus musculus glutathione transferase zeta 1 (maleylacetoacetate isomerase) (Gstz1), transcript variant 2, mRNA [NM_001252555]	14874	NM_010363///NM_001252555	ENSMUST00000222885///ENSMUST00000063117
A_51_P440365,A_66_P127693|20321	6.58458e-17	1.46969e-18	2.74103	1.15619	-2.37075	2.761	1.1291	-2.44531	Frrs1	ferric-chelate reductase 1	Mus musculus ferric-chelate reductase 1 (Frrs1), transcript variant 2, mRNA [NM_009146]///ferric-chelate reductase 1 [Source:MGI Symbol;Acc:MGI:108076] [ENSMUST00000195905]	20321	NM_009146///XM_017319511	ENSMUST00000040260///ENSMUST00000195905
A_55_P2151143|100040563	6.61948e-17	1.48011e-18	-2.25788	-1.19781	1.88502	-2.19051	-1.20028	1.825	Dynlt1c	dynein light chain Tctex-type 1C	Mus musculus dynein light chain Tctex-type 1C (Dynlt1c), mRNA [NM_001166630]	100040563	NM_001166630	ENSMUST00000092966
A_55_P1990785,A_52_P6297,A_55_P2917414,A_55_P2717099|226409	6.64547e-17	1.49504e-18	-4.63502	-1.10889	4.17985	-4.63816	-1.25226	3.70382	Zranb3	zinc finger, RAN-binding domain containing 3	Mus musculus zinc finger, RAN-binding domain containing 3 (Zranb3), transcript variant 1, mRNA [NM_027678]///zinc finger, RAN-binding domain containing 3 [Source:MGI Symbol;Acc:MGI:1918362] [ENSMUST00000127393]	226409	NM_027678	ENSMUST00000086614///ENSMUST00000131732///ENSMUST00000112538///ENSMUST00000127393
A_55_P2037478,A_51_P307232|16579	6.64547e-17	1.49433e-18	-1.83909	-1.14501	1.60617	-1.93543	-1.21609	1.59152	Kifap3	kinesin-associated protein 3	Mus musculus kinesin-associated protein 3 (Kifap3), transcript variant 2, mRNA [NM_010629]	16579	NM_010629	ENSMUST00000077642
A_52_P131836|53414	6.64547e-17	1.49648e-18	2.8538	1.15255	-2.47608	2.9942	1.52822	-1.95927	Bysl	bystin-like	Mus musculus bystin-like (Bysl), mRNA [NM_016859]	53414	NM_016859	ENSMUST00000024783
A_30_P01027901	6.64547e-17	1.4959e-18	1.92935	-1.22064	-2.35504	1.81512	-1.17682	-2.13607			lincRNA:chr12:50490638-50508093 forward strand
A_55_P2177885|629378	6.82424e-17	1.54368e-18	-6.10454	-1.22024	5.00276	-5.98375	-1.21136	4.93968	Dact3	dishevelled-binding antagonist of beta-catenin 3	Mus musculus dishevelled-binding antagonist of beta-catenin 3 (Dact3), mRNA [NM_001081655]	629378	NM_001081655	ENSMUST00000108493
A_52_P94071,A_52_P240542|15902	6.82424e-17	1.54486e-18	-3.47014	-3.997	-1.15183	-3.36772	-4.4339	-1.31659	Id2	inhibitor of DNA binding 2	inhibitor of DNA binding 2 [Source:MGI Symbol;Acc:MGI:96397] [ENSMUST00000222667]///Mus musculus inhibitor of DNA binding 2 (Id2), mRNA [NM_010496]	15902	NM_010496	ENSMUST00000222667///ENSMUST00000020974
A_52_P366105,A_66_P139220|219024	6.82424e-17	1.54165e-18	-1.55147	1.09619	1.7007	-1.50886	1.11761	1.68631	Tmem55b	transmembrane protein 55b	Mus musculus transmembrane protein 55b (Tmem55b), transcript variant 1, mRNA [NM_001033271]	219024	NM_001033271	ENSMUST00000160538///ENSMUST00000159745
A_51_P282557|12267	6.83444e-17	1.54989e-18	9.98375	1.80691	-5.5253	11.4756	2.45219	-4.67975	C3ar1	complement component 3a receptor 1	Mus musculus complement component 3a receptor 1 (C3ar1), mRNA [NM_009779]	12267	NM_009779	ENSMUST00000042081
A_55_P2913400|103136	6.8862e-17	1.56436e-18	2.26403	1.12023	-2.02105	2.28869	1.16001	-1.97299	Pwp1	PWP1 homolog, endonuclein	Mus musculus PWP1 homolog, endonuclein (Pwp1), mRNA [NM_133993]	103136	NM_133993	ENSMUST00000001836
A_66_P122250,A_51_P507023|103466	6.92309e-17	1.57549e-18	5.14749	1.52824	-3.36825	5.02017	1.42731	-3.51723	Nt5dc3	5'-nucleotidase domain containing 3	Mus musculus 5'-nucleotidase domain containing 3 (Nt5dc3), mRNA [NM_175331]	103466	NM_175331	ENSMUST00000218802///ENSMUST00000099396
A_55_P1964108,A_51_P220723|68170	6.95375e-17	1.58523e-18	-1.93765	-1.1811	1.64054	-1.82822	-1.15367	1.5847	B230118H07Rik	RIKEN cDNA B230118H07 gene	Mus musculus RIKEN cDNA B230118H07 gene (B230118H07Rik), mRNA [NM_026592]	68170	NM_026592	ENSMUST00000111231///ENSMUST00000177152
A_51_P113274|20170	6.99007e-17	1.59629e-18	1.82441	-1.0922	-1.99263	1.96904	-1.00348	-1.9759	Hps6	HPS6, biogenesis of lysosomal organelles complex 2 subunit 3	Mus musculus Hermansky-Pudlak syndrome 6 (Hps6), mRNA [NM_176785]	20170	NM_176785	ENSMUST00000099393
A_55_P2168267	7.01612e-17	1.60502e-18	-1.3978	-2.37497	-1.69908	-1.2315	-2.59617	-2.10814
A_55_P2721945,A_55_P2083098|68972	7.40801e-17	1.69761e-18	-2.80106	-1.28779	2.17509	-2.68897	-1.25089	2.14964	Tatdn3	TatD DNase domain containing 3	TatD DNase domain containing 3 [Source:MGI Symbol;Acc:MGI:1916222] [ENSMUST00000124497]///Mus musculus TatD DNase domain containing 3 (Tatdn3), transcript variant 2, mRNA [NM_001163421]	68972	NM_001163421	ENSMUST00000124497///ENSMUST00000156341
A_55_P2004752|107849	7.45654e-17	1.7117e-18	3.50729	2.78384	-1.25987	4.09851	3.02711	-1.35393	Prl2c5	prolactin family 2, subfamily c, member 5	Mus musculus prolactin family 2, subfamily c, member 5 (Prl2c5), transcript variant 1, mRNA [NM_001311129]	107849	NM_001311129	ENSMUST00000223271
A_55_P2803815,A_51_P507242|14284	7.53806e-17	1.7334e-18	1.94463	1.08034	-1.80001	2.34819	-1.00795	-2.36686	Fosl2	fos-like antigen 2	Mus musculus fos-like antigen 2 (Fosl2), mRNA [NM_008037]	14284	NM_008037	ENSMUST00000031017///ENSMUST00000202169
A_51_P497123,A_52_P418766|212728	7.606e-17	1.75205e-18	2.4928	1.39195	-1.79087	2.40947	1.29459	-1.86119	Tarbp1	TAR RNA binding protein 1	Mus musculus TAR RNA binding protein 1 (Tarbp1), mRNA [NM_001159907]///TAR RNA binding protein 1 [Source:MGI Symbol;Acc:MGI:4936930] [ENSMUST00000170518]	212728	NM_001159907///XM_011248339	ENSMUST00000170518
A_51_P118885|17117	7.7633e-17	1.79445e-18	-2.25329	-1.1432	1.97104	-2.47615	-1.13221	2.18701	Amacr	alpha-methylacyl-CoA racemase	Mus musculus alpha-methylacyl-CoA racemase (Amacr), mRNA [NM_008537]	17117	NM_008537	ENSMUST00000070877
A_51_P514700,A_55_P1965154|66442	7.7633e-17	1.79441e-18	-2.97128	-1.38323	2.14807	-3.3064	-1.40228	2.35786	Spc25	SPC25, NDC80 kinetochore complex component, homolog (S. cerevisiae)	Mus musculus SPC25, NDC80 kinetochore complex component, homolog (S. cerevisiae) (Spc25), transcript variant 4, mRNA [NM_025565]///Mus musculus SPC25, NDC80 kinetochore complex component, homolog (S. cerevisiae) (Spc25), transcript variant 2, mRNA [NM_001305800]	66442	NM_025565///NM_001305800	ENSMUST00000149643///ENSMUST00000112320
A_55_P1991964,A_55_P2736710|245666	7.84094e-17	1.81551e-18	-2.22494	-1.28865	1.72657	-2.41623	-1.4762	1.63679	Iqsec2	IQ motif and Sec7 domain 2	Mus musculus IQ motif and Sec7 domain 2 (Iqsec2), transcript variant 1, mRNA [NM_001114664]///IQ motif and Sec7 domain 2 [Source:MGI Symbol;Acc:MGI:3528396] [ENSMUST00000146835]	245666	NM_001114664	ENSMUST00000168786///ENSMUST00000146835
A_55_P2044207,A_51_P283876|68021	7.8602e-17	1.82309e-18	-2.54642	-1.73576	1.46704	-2.4487	-1.86355	1.31399	Bphl	biphenyl hydrolase-like (serine hydrolase, breast epithelial mucin-associated antigen)	Mus musculus biphenyl hydrolase-like (serine hydrolase, breast epithelial mucin-associated antigen) (Bphl), mRNA [NM_026512]	68021	NM_026512	ENSMUST00000222691///ENSMUST00000223251
A_52_P122696,A_55_P2740909|56327	7.97157e-17	1.85209e-18	-2.6838	-1.04977	2.55656	-2.54192	1.01195	2.5723	Arl2	ADP-ribosylation factor-like 2	Mus musculus ADP-ribosylation factor-like 2 (Arl2), mRNA [NM_019722]	56327	NM_019722	ENSMUST00000123193///ENSMUST00000025893
A_66_P108864|100503810	8.01303e-17	1.8649e-18	-2.29585	-1.21064	1.89639	-2.21813	-1.42234	1.55949	Gm13056	predicted gene 13056	PREDICTED: Mus musculus predicted gene 13056 (Gm13056), ncRNA [XR_104899]	100503810	XR_104899
A_51_P100034,A_55_P2057994|69674	8.12152e-17	1.8966e-18	-2.23991	-1.10382	2.02924	-2.46472	-1.13162	2.17804	Mif4gd	MIF4G domain containing	Mus musculus MIF4G domain containing (Mif4gd), transcript variant 1, mRNA [NM_027162]///Mus musculus MIF4G domain containing (Mif4gd), transcript variant 3, mRNA [NM_001243586]	69674	NM_027162///NM_001243586	ENSMUST00000106507///ENSMUST00000021087
A_55_P2092904,A_52_P3825|107986	8.12152e-17	1.89636e-18	-3.17123	1.21542	3.85436	-3.28597	1.01012	3.31921	Ddb2	damage specific DNA binding protein 2	Mus musculus damage specific DNA binding protein 2 (Ddb2), mRNA [NM_028119]	107986	NM_028119	ENSMUST00000028696
A_52_P159050,A_52_P253915,A_51_P356353|110911	8.15536e-17	1.90774e-18	-2.48922	1.0058	2.50364	-2.68352	-1.13608	2.36208	Cds2	CDP-diacylglycerol synthase (phosphatidate cytidylyltransferase) 2	Mus musculus CDP-diacylglycerol synthase (phosphatidate cytidylyltransferase) 2 (Cds2), transcript variant 3, mRNA [NM_001291040]///Mus musculus CDP-diacylglycerol synthase (phosphatidate cytidylyltransferase) 2 (Cds2), transcript variant 1, mRNA [NM_138651]	110911	NM_001291040///NM_138651	ENSMUST00000110158///ENSMUST00000138194///ENSMUST00000103181
A_51_P161362|230737	8.32622e-17	1.95102e-18	1.9422	-1.01786	-1.9769	2.10149	1.05912	-1.98418	Gnl2	guanine nucleotide binding protein-like 2 (nucleolar)	Mus musculus guanine nucleotide binding protein-like 2 (nucleolar) (Gnl2), mRNA [NM_145552]	230737	NM_145552	ENSMUST00000030684
A_52_P471143,A_55_P2495807|433813	8.37132e-17	1.96491e-18	4.13669	1.1092	-3.72943	4.34528	1.4893	-2.91767	Pusl1	pseudouridylate synthase-like 1	Mus musculus pseudouridylate synthase-like 1 (Pusl1), mRNA [NM_001033490]	433813	NM_001033490	ENSMUST00000097737///ENSMUST00000142724
A_51_P214306|219072	8.38486e-17	1.97142e-18	-3.72412	-1.35712	2.74414	-4.11555	-1.5256	2.69766	Haus4	HAUS augmin-like complex, subunit 4	Mus musculus HAUS augmin-like complex, subunit 4 (Haus4), mRNA [NM_145462]	219072	NM_145462	ENSMUST00000022784
A_66_P138795,A_55_P1999633,A_66_P120076|12704	8.41587e-17	1.98205e-18	-3.43053	-1.05729	3.24465	-3.62443	-1.23293	2.9397	Cit	citron	citron [Source:MGI Symbol;Acc:MGI:105313] [ENSMUST00000051704]///Mus musculus citron (Cit), mRNA [NM_007708]///citron [Source:MGI Symbol;Acc:MGI:105313] [ENSMUST00000147330]	12704	NM_007708///XM_006530151	ENSMUST00000051704///ENSMUST00000102560///ENSMUST00000147330
A_55_P1981789|101867	8.4953e-17	2.00413e-18	3.05672	1.1878	-2.57344	3.14884	1.49465	-2.10674	Rrp8	ribosomal RNA processing 8, methyltransferase, homolog (yeast)	Mus musculus ribosomal RNA processing 8, methyltransferase, homolog (yeast) (Rrp8), transcript variant 1, mRNA [NM_133951]	101867	NM_133951	ENSMUST00000098148
A_30_P01022120	8.58762e-17	2.02932e-18	24.4326	11.8994	-2.05327	40.3115	25.8296	-1.56067			lincRNA:chr13:22110479-22116629 reverse strand
A_51_P410451,A_55_P2728372|71924	8.66969e-17	2.05216e-18	-2.02934	1.21657	2.46885	-2.42505	1.03318	2.50551	Tube1	epsilon-tubulin 1	Mus musculus epsilon-tubulin 1 (Tube1), mRNA [NM_028006]	71924	NM_028006	ENSMUST00000019991///ENSMUST00000213898
A_52_P444839,A_55_P2017826,A_55_P2745608|17863	8.67582e-17	2.05706e-18	-3.11953	1.0442	3.25742	-3.43512	1.01961	3.50249	Myb	myeloblastosis oncogene	Mus musculus myeloblastosis oncogene (Myb), transcript variant 2, mRNA [NM_010848]///Mus musculus myeloblastosis oncogene (Myb), transcript variant 1, mRNA [NM_001198914]	17863	NM_010848///NM_001198914	ENSMUST00000186446
A_55_P2020256,A_65_P17784,A_55_P2616712|235344	8.94482e-17	2.12439e-18	2.03642	1.66569	-1.22257	1.91195	1.53109	-1.24875	Sik2	salt inducible kinase 2	Mus musculus salt inducible kinase 2 (Sik2), mRNA [NM_178710]///PREDICTED: Mus musculus salt inducible kinase 2 (Sik2), transcript variant X1, mRNA [XM_006510266]	235344	NM_178710///XM_006510266	ENSMUST00000176824///ENSMUST00000068484
A_51_P408071|208628	8.99185e-17	2.13913e-18	-2.00484	-1.24765	1.6069	-2.11211	-1.2558	1.68189	Kntc1	kinetochore associated 1	Mus musculus kinetochore associated 1 (Kntc1), mRNA [NM_001042421]	208628	NM_001042421	ENSMUST00000197265
A_51_P439170,A_55_P2054310,A_55_P2867629|17113	9.04183e-17	2.15461e-18	1.70489	1.23667	-1.37861	1.78961	1.29297	-1.38411	M6pr	mannose-6-phosphate receptor, cation dependent	Mus musculus mannose-6-phosphate receptor, cation dependent (M6pr), mRNA [NM_010749]	17113	NM_010749	ENSMUST00000112610///ENSMUST00000007602///ENSMUST00000123093
A_55_P2139027,A_52_P27225|18810	9.12848e-17	2.17889e-18	3.12716	1.02428	-3.05304	3.45819	1.19851	-2.8854	Plec	plectin	Mus musculus plectin (Plec), transcript variant 13, mRNA [NM_001163540]///Mus musculus plectin (Plec), transcript variant 6, mRNA [NM_201389]	18810	NM_001163540///NM_201389	ENSMUST00000073418///ENSMUST00000166428
A_55_P1967291,A_52_P363039|215387	9.22113e-17	2.20796e-18	-2.36098	-1.0977	2.15085	-2.42254	-1.12392	2.15543	Ncaph	non-SMC condensin I complex, subunit H	Mus musculus non-SMC condensin I complex, subunit H (Ncaph), mRNA [NM_144818]	215387	NM_144818	ENSMUST00000110387///ENSMUST00000175885
A_51_P461884,A_52_P610121|11352	9.22113e-17	2.20833e-18	2.60345	1.31851	-1.97453	2.71137	1.28767	-2.10564	Abl2	v-abl Abelson murine leukemia viral oncogene 2 (arg, Abelson-related gene)	Mus musculus v-abl Abelson murine leukemia viral oncogene 2 (arg, Abelson-related gene) (Abl2), transcript variant 2, mRNA [NM_009595]	11352	NM_009595	ENSMUST00000166172///ENSMUST00000027888
A_51_P513682,A_55_P2113964|66977	9.31409e-17	2.23429e-18	-1.69247	1.0372	1.75542	-1.76492	1.06943	1.88746	Nuf2	NUF2, NDC80 kinetochore complex component	Mus musculus NUF2, NDC80 kinetochore complex component (Nuf2), mRNA [NM_023284]///NUF2, NDC80 kinetochore complex component [Source:MGI Symbol;Acc:MGI:1914227] [ENSMUST00000192248]	66977	NM_023284	ENSMUST00000028000///ENSMUST00000192248
A_51_P349662,A_52_P49368|102162	9.35235e-17	2.24718e-18	2.25413	1.17138	-1.92434	2.40567	1.37667	-1.74745	Taf5l	TATA-box binding protein associated factor 5 like	Mus musculus TATA-box binding protein associated factor 5 like (Taf5l), mRNA [NM_133966]	102162	NM_133966	ENSMUST00000165628///ENSMUST00000140537
A_55_P2713585,A_52_P533146|13198	9.37579e-17	2.25653e-18	-2.7972	-2.01641	1.38721	-2.47075	-2.07269	1.19205	Ddit3	DNA-damage inducible transcript 3	DNA-damage inducible transcript 3 [Source:MGI Symbol;Acc:MGI:109247] [ENSMUST00000134686]///Mus musculus DNA-damage inducible transcript 3 (Ddit3), transcript variant 1, mRNA [NM_007837]	13198	XM_017313791///NM_007837	ENSMUST00000134686///ENSMUST00000139091
A_55_P2266977,A_55_P2088685,A_55_P2721374,A_52_P162509|74340	9.37758e-17	2.26069e-18	2.18131	1.12305	-1.94231	2.22073	1.17772	-1.88562	Ahcyl2	S-adenosylhomocysteine hydrolase-like 2	Mus musculus S-adenosylhomocysteine hydrolase-like 2 (Ahcyl2), transcript variant 4, mRNA [NM_001347084]///S-adenosylhomocysteine hydrolase-like 2 [Source:MGI Symbol;Acc:MGI:1921590] [ENSMUST00000150365]///S-adenosylhomocysteine hydrolase-like 2 [Source:MGI Symbol;Acc:MGI:1921590] [ENSMUST00000143707]///Mus musculus S-adenosylhomocysteine hydrolase-like 2 (Ahcyl2), transcript variant 1, mRNA [NM_…	74340	NM_001347084///NM_021414	ENSMUST00000102995///ENSMUST00000150365///ENSMUST00000143707///ENSMUST00000141304
A_51_P468249|18675	9.40035e-17	2.26991e-18	2.70282	3.20348	1.18524	2.53927	3.10463	1.22265	Phex	phosphate regulating endopeptidase homolog, X-linked	Mus musculus phosphate regulating endopeptidase homolog, X-linked (Phex), mRNA [NM_011077]	18675	NM_011077	ENSMUST00000079945
A_55_P2713451,A_55_P2506055,A_66_P106584,A_66_P132752|101185	9.45138e-17	2.28916e-18	-1.99564	-1.03995	1.91899	-2.13272	-1.06578	2.00109	Pot1a	protection of telomeres 1A	protection of telomeres 1A [Source:MGI Symbol;Acc:MGI:2141503] [ENSMUST00000136089]///Mus musculus protection of telomeres 1A (Pot1a), mRNA [NM_133931]///protection of telomeres 1A [Source:MGI Symbol;Acc:MGI:2141503] [ENSMUST00000115329]	101185	NM_133931	ENSMUST00000136089///ENSMUST00000115330///ENSMUST00000115329///ENSMUST00000134339
A_51_P506356|67689	9.45138e-17	2.28974e-18	-2.19943	-1.76674	1.24491	-2.09383	-2.01602	1.0386	Aldh3b1	aldehyde dehydrogenase 3 family, member B1	Mus musculus aldehyde dehydrogenase 3 family, member B1 (Aldh3b1), mRNA [NM_026316]	67689	NM_026316	ENSMUST00000051803
A_55_P1967928,A_55_P1967931|67222	9.46979e-17	2.29796e-18	2.38164	1.16033	-2.05255	2.52412	1.18581	-2.12861	Srfbp1	serum response factor binding protein 1	Mus musculus serum response factor binding protein 1 (Srfbp1), mRNA [NM_026040]///PREDICTED: Mus musculus serum response factor binding protein 1 (Srfbp1), transcript variant X1, misc_RNA [XR_386008]	67222	NM_026040///XR_386008	ENSMUST00000025406
A_51_P213205|78408	9.62829e-17	2.34025e-18	-4.18543	1.09786	4.595	-4.94947	-1.10135	4.49402	Fam131a	family with sequence similarity 131, member A	Mus musculus family with sequence similarity 131, member A (Fam131a), mRNA [NM_133778]	78408	NM_133778	ENSMUST00000118919
A_52_P671013,A_52_P310981,A_55_P1965584|13684	9.78098e-17	2.38125e-18	2.18775	1.11942	-1.95436	2.35726	1.17602	-2.00444	Eif4e	eukaryotic translation initiation factor 4E	Mus musculus eukaryotic translation initiation factor 4E (Eif4e), transcript variant 2, mRNA [NM_001313980]///Mus musculus eukaryotic translation initiation factor 4E (Eif4e), transcript variant 1, mRNA [NM_007917]///eukaryotic translation initiation factor 4E [Source:MGI Symbol;Acc:MGI:95305] [ENSMUST00000200020]	13684	NM_001313980///NM_007917	ENSMUST00000029803///ENSMUST00000200020
A_55_P2074688|15423	1.01547e-16	2.47627e-18	-3.74242	-1.1122	3.36489	-4.34262	-1.38486	3.1358	Hoxc4	homeobox C4	Mus musculus homeobox C4 (Hoxc4), mRNA [NM_013553]	15423	NM_013553	ENSMUST00000100164
A_55_P2055087|19088	1.01642e-16	2.48263e-18	-1.40938	1.49039	2.10051	-1.36342	1.57242	2.14387	Prkar2b	protein kinase, cAMP dependent regulatory, type II beta	Mus musculus protein kinase, cAMP dependent regulatory, type II beta (Prkar2b), mRNA [NM_011158]	19088	NM_011158	ENSMUST00000003079
A_51_P234728,A_55_P1967069|67168	1.02116e-16	2.49826e-18	2.11327	1.70101	-1.24236	2.21129	1.67792	-1.31788	Lpar6	lysophosphatidic acid receptor 6	Mus musculus lysophosphatidic acid receptor 6 (Lpar6), mRNA [NM_175116]	67168	NM_175116	ENSMUST00000044405
A_52_P58041,A_55_P2000390|67771	1.02151e-16	2.50316e-18	2.06691	1.07566	-1.92153	1.9636	1.08439	-1.81079	Arpc5	actin related protein 2/3 complex, subunit 5	Mus musculus actin related protein 2/3 complex, subunit 5 (Arpc5), mRNA [NM_026369]	67771	NM_026369	ENSMUST00000143008///ENSMUST00000077755
A_51_P361788|30960	1.03859e-16	2.54915e-18	1.66403	-1.05609	-1.75736	1.78992	1.0335	-1.7319	Vapa	vesicle-associated membrane protein, associated protein A	Mus musculus vesicle-associated membrane protein, associated protein A (Vapa), mRNA [NM_013933]	30960	NM_013933	ENSMUST00000024897
A_55_P2174967,A_55_P2715678,A_52_P649236,A_65_P07800|68626	1.05013e-16	2.5858e-18	2.30005	1.01253	-2.27159	2.22698	1.16603	-1.90988	Elac2	elaC ribonuclease Z 2	elaC ribonuclease Z 2 [Source:MGI Symbol;Acc:MGI:1890496] [ENSMUST00000101049]///Mus musculus elaC ribonuclease Z 2 (Elac2), mRNA [NM_023479]///elaC ribonuclease Z 2 [Source:MGI Symbol;Acc:MGI:1890496] [ENSMUST00000128693]	68626	XM_017314731///NM_023479	ENSMUST00000101049///ENSMUST00000071891///ENSMUST00000128693
A_51_P291501|218630	1.05013e-16	2.58198e-18	-1.89683	-2.43937	-1.28603	-1.97	-2.49436	-1.26617	Ccno	cyclin O	Mus musculus cyclin O (Ccno), mRNA [NM_001081062]	218630	NM_001081062	ENSMUST00000038404
A_51_P457528|12442	1.05653e-16	2.60576e-18	-2.03209	-1.17943	1.72295	-2.06525	-1.24052	1.66482	Ccnb2	cyclin B2	Mus musculus cyclin B2 (Ccnb2), mRNA [NM_007630]	12442	NM_007630	ENSMUST00000034742
A_55_P2182736,A_55_P2807989,A_52_P78023|67803	1.05871e-16	2.61535e-18	-1.8042	-1.00159	1.80133	-1.77279	1.06327	1.88494	Limd2	LIM domain containing 2	Mus musculus LIM domain containing 2 (Limd2), mRNA [NM_172397]	67803	NM_172397	ENSMUST00000045923
A_52_P161806|246257	1.06103e-16	2.62529e-18	2.42742	1.07471	-2.25869	2.37435	1.13657	-2.08905	Ovca2	candidate tumor suppressor in ovarian cancer 2	Mus musculus candidate tumor suppressor in ovarian cancer 2 (Ovca2), mRNA [NM_027136]	246257	NM_027136	ENSMUST00000071562
A_51_P300618|241324	1.06471e-16	2.63861e-18	-2.87913	-1.44643	1.9905	-3.24317	-1.68078	1.92957	Crb2	crumbs family member 2	Mus musculus crumbs family member 2 (Crb2), mRNA [NM_001163566]	241324	NM_001163566	ENSMUST00000050372
A_55_P2106058,A_66_P140831|100169874	1.06589e-16	2.64711e-18	-1.92312	-1.16384	1.65239	-1.89226	-1.14504	1.65258	Gm11110	predicted gene 11110	Mus musculus predicted gene 11110 (Gm11110), long non-coding RNA [NR_033508]	100169874	NR_033508	ENSMUST00000112915
A_55_P2159895,A_52_P254275|22710	1.06589e-16	2.65002e-18	2.98633	1.74414	-1.71221	2.93142	1.53617	-1.90826	Zfp52	zinc finger protein 52	Mus musculus zinc finger protein 52 (Zfp52), mRNA [NM_144515]	22710	NM_144515	ENSMUST00000079242
A_52_P121,A_55_P2924952|72085	1.07306e-16	2.67637e-18	-1.5383	1.10184	1.69496	-1.67409	1.01884	1.70563	Osgepl1	O-sialoglycoprotein endopeptidase-like 1	Mus musculus O-sialoglycoprotein endopeptidase-like 1 (Osgepl1), transcript variant 1, mRNA [NM_001285839]	72085	NM_001285839	ENSMUST00000135614///ENSMUST00000027265
A_55_P2715830,A_51_P510663|109115	1.07306e-16	2.6742e-18	-2.78921	-1.09876	2.53852	-2.68028	-1.25069	2.14304	Supt3	suppressor of Ty 3	suppressor of Ty 3 [Source:MGI Symbol;Acc:MGI:1923723] [ENSMUST00000130623]///Mus musculus suppressor of Ty 3 (Supt3), mRNA [NM_178652]	109115	NM_178652	ENSMUST00000130623///ENSMUST00000127798
A_52_P580458,A_55_P2179834|234366	1.08057e-16	2.69939e-18	1.5569	1.03281	-1.50744	1.52639	1.12969	-1.35116	Gatad2a	GATA zinc finger domain containing 2A	Mus musculus GATA zinc finger domain containing 2A (Gatad2a), transcript variant 1, mRNA [NM_145596]	234366	NM_145596	ENSMUST00000212478
A_51_P343613,A_55_P2076906|259300	1.08297e-16	2.70968e-18	1.91827	-1.17544	-2.25481	1.97452	-1.10891	-2.18957	Ehd2	EH-domain containing 2	Mus musculus EH-domain containing 2 (Ehd2), mRNA [NM_153068]///EH-domain containing 2 [Source:MGI Symbol;Acc:MGI:2154274] [ENSMUST00000098799]	259300	NM_153068///XM_011250582	ENSMUST00000098799
A_55_P2108883|101807	1.10419e-16	2.76715e-18	-2.80408	-1.00007	2.80389	-2.82474	1.00886	2.84976	AV356131	expressed sequence AV356131	Q9W6W0_LATCH (Q9W6W0) Olfactory receptor (Fragment), partial (10%) [TC1647450]	101807
A_55_P2718328,A_55_P2926626,A_55_P2059686|100088	1.10567e-16	2.77592e-18	2.94988	1.31677	-2.24025	3.08182	1.49083	-2.06719	Rcc1	regulator of chromosome condensation 1	regulator of chromosome condensation 1 [Source:MGI Symbol;Acc:MGI:1913989] [ENSMUST00000137238]///Mus musculus regulator of chromosome condensation 1 (Rcc1), transcript variant 2, mRNA [NM_133878]///Mus musculus regulator of chromosome condensation 1 (Rcc1), transcript variant 1, mRNA [NM_001197082]	100088	NM_133878///NM_001197082	ENSMUST00000137238///ENSMUST00000155129///ENSMUST00000105951
A_55_P2741819,A_55_P2128263,A_55_P2128270|192285	1.10567e-16	2.78089e-18	-2.69742	-1.02307	2.6366	-3.18586	-1.12677	2.82743	Phf21a	PHD finger protein 21A	Mus musculus PHD finger protein 21A (Phf21a), transcript variant 4, mRNA [NM_001346704]	192285	NM_001346704	ENSMUST00000159366///ENSMUST00000090586///ENSMUST00000161067
A_55_P1976764,A_52_P231410,A_55_P2728262|26939	1.10567e-16	2.78405e-18	2.41518	1.24506	-1.93981	2.5736	1.32003	-1.94965	Polr3e	polymerase (RNA) III (DNA directed) polypeptide E	Mus musculus polymerase (RNA) III (DNA directed) polypeptide E (Polr3e), transcript variant 1, mRNA [NM_025298]	26939	NM_025298	ENSMUST00000106483///ENSMUST00000033173
A_51_P430082|22117	1.10651e-16	2.79054e-18	-2.8008	-1.42211	1.96947	-2.76008	-1.31138	2.10471	Tst	thiosulfate sulfurtransferase, mitochondrial	Mus musculus thiosulfate sulfurtransferase, mitochondrial (Tst), mRNA [NM_009437]	22117	NM_009437	ENSMUST00000058659
A_51_P330369,A_55_P2929376|99167	1.12712e-16	2.84846e-18	2.53201	1.27999	-1.97815	2.70316	1.44146	-1.8753	Ssx2ip	synovial sarcoma, X 2 interacting protein	Mus musculus synovial sarcoma, X 2 interacting protein (Ssx2ip), transcript variant 1, mRNA [NM_138744]///Mus musculus synovial sarcoma, X 2 interacting protein (Ssx2ip), transcript variant 2, mRNA [NM_001253768]	99167	NM_138744///NM_001253768	ENSMUST00000039021///ENSMUST00000129978
A_55_P2423228|100503330	1.12712e-16	2.85148e-18	5.54364	1.10211	-5.03003	4.88045	1.10259	-4.42635	AI464196	expressed sequence AI464196		100503330
A_55_P2107120,A_55_P2107117,A_66_P100789|69612	1.14047e-16	2.88978e-18	1.96013	1.4037	-1.39641	1.98789	1.41562	-1.40425	Kansl2	KAT8 regulatory NSL complex subunit 2	Mus musculus KAT8 regulatory NSL complex subunit 2 (Kansl2), transcript variant 3, mRNA [NM_001289438]///PREDICTED: Mus musculus KAT8 regulatory NSL complex subunit 2 (Kansl2), transcript variant X1, mRNA [XM_006521360]	69612	NM_001289438///XM_006521360	ENSMUST00000116400
A_52_P1069478,A_55_P2944521|100038570	1.18563e-16	3.00893e-18	-2.50319	-1.66537	1.50308	-2.19694	-1.77028	1.24102	Prcd	photoreceptor disc component	Mus musculus photoreceptor disc component (Prcd), mRNA [NM_001163318]///photoreceptor disc component [Source:MGI Symbol;Acc:MGI:3649529] [ENSMUST00000148484]	100038570	NM_001163318	ENSMUST00000178875///ENSMUST00000148484
A_52_P370453,A_51_P355442,A_51_P151820|207932	1.22264e-16	3.11258e-18	4.25836	1.47303	-2.89088	4.27581	1.4461	-2.95679	Urb1	URB1 ribosome biogenesis 1 homolog (S. cerevisiae)	URB1 ribosome biogenesis 1 homolog (S. cerevisiae) [Source:MGI Symbol;Acc:MGI:2146468] [ENSMUST00000140942]///Mus musculus URB1 ribosome biogenesis 1 homolog (S. cerevisiae) (Urb1), mRNA [NM_029497]	207932	NM_029497	ENSMUST00000140942///ENSMUST00000142955///ENSMUST00000140920
A_55_P2047648|71883	1.22264e-16	3.11082e-18	-1.99567	-1.0977	1.81804	-2.09025	-1.16291	1.79744	Coq2	coenzyme Q2 4-hydroxybenzoate polyprenyltransferase	Mus musculus coenzyme Q2 4-hydroxybenzoate polyprenyltransferase (Coq2), mRNA [NM_027978]	71883	NM_027978	ENSMUST00000031262
A_55_P2640299,A_51_P496751,A_66_P108753,A_55_P2640284,A_55_P2640309|55989	1.23936e-16	3.16005e-18	2.08756	-1.00037	-2.08834	2.12726	1.10563	-1.92403	Nop58	NOP58 ribonucleoprotein	Mus musculus NOP58 ribonucleoprotein (Nop58), mRNA [NM_018868]///NOP58 ribonucleoprotein [Source:MGI Symbol;Acc:MGI:1933184] [ENSMUST00000189289]	55989	NM_018868	ENSMUST00000189327///ENSMUST00000027174///ENSMUST00000190265///ENSMUST00000189289///ENSMUST00000185368
A_52_P95910,A_51_P481342,A_51_P332717,A_65_P00596|22234	1.2447e-16	3.1786e-18	3.35502	1.62177	-2.06874	3.77247	1.43138	-2.63554	Ugcg	UDP-glucose ceramide glucosyltransferase	Mus musculus UDP-glucose ceramide glucosyltransferase (Ugcg), mRNA [NM_011673]	22234	NM_011673	ENSMUST00000030074///ENSMUST00000128227
A_55_P1986356,A_66_P103797,A_55_P1986351|544696	1.25652e-16	3.21379e-18	-3.07737	-1.13501	2.71131	-3.98812	-1.38544	2.87861	Tbc1d32	TBC1 domain family, member 32	TBC1 domain family, member 32 [Source:MGI Symbol;Acc:MGI:2442827] [ENSMUST00000219385]///TBC1 domain family, member 32 [Source:MGI Symbol;Acc:MGI:2442827] [ENSMUST00000217792]///Mus musculus TBC1 domain family, member 32 (Tbc1d32), mRNA [NM_001033385]	544696	NM_001033385	ENSMUST00000219385///ENSMUST00000217792///ENSMUST00000099739
A_52_P574653,A_55_P2719920|12122	1.25736e-16	3.22093e-18	2.47237	1.17103	-2.11128	2.50326	1.3414	-1.86615	Bid	BH3 interacting domain death agonist	Mus musculus BH3 interacting domain death agonist (Bid), mRNA [NM_007544]///BH3 interacting domain death agonist [Source:MGI Symbol;Acc:MGI:108093] [ENSMUST00000125915]	12122	NM_007544	ENSMUST00000004560///ENSMUST00000125915
A_51_P327559,A_66_P129770,A_52_P659925,A_55_P2738589,A_55_P2730766,A_55_P2905209|12091	1.29114e-16	3.31258e-18	-2.24897	-1.31478	1.71053	-2.20037	-1.50011	1.4668	Glb1	galactosidase, beta 1	UI-M-BH1-akw-c-05-0-UI.s1 NIH_BMAP_M_S2 Mus musculus cDNA clone UI-M-BH1-akw-c-05-0-UI 3'. [AW046170]///Q8C847_MOUSE (Q8C847) 16 days embryo head cDNA, RIKEN full-length enriched library, clone:C130062G03 product:galactosidase, beta 1, full insert sequence, complete [TC1592488]///Mus musculus galactosidase, beta 1 (Glb1), transcript variant 1, mRNA [NM_009752]///MUSBGAL16 acid beta-galactosidase …	12091	NM_009752	ENSMUST00000063042
A_51_P488789,A_55_P2715854,A_55_P1999187,A_55_P2738202|69131	1.31868e-16	3.38849e-18	2.11063	1.42437	-1.48181	2.02272	1.47788	-1.36867	Cdk12	cyclin-dependent kinase 12	Mus musculus cyclin-dependent kinase 12 (Cdk12), transcript variant 1, mRNA [NM_001109626]///cyclin-dependent kinase 12 [Source:MGI Symbol;Acc:MGI:1098802] [ENSMUST00000145113]///Mus musculus cyclin-dependent kinase 12 (Cdk12), transcript variant 3, mRNA [NM_026952]	69131	NM_001109626///NM_026952	ENSMUST00000107538///ENSMUST00000145113///ENSMUST00000003203
A_55_P2066007|230872	1.3191e-16	3.39481e-18	-3.00572	1.0452	3.14157	-2.98515	1.02843	3.07	Crocc	ciliary rootlet coiled-coil, rootletin	Mus musculus ciliary rootlet coiled-coil, rootletin (Crocc), transcript variant 1, mRNA [NM_172122]	230872	NM_172122	ENSMUST00000040222
A_51_P361220,A_66_P132734|14366	1.3217e-16	3.40675e-18	-3.50335	-1.48364	2.36132	-3.72044	-1.6264	2.28754	Fzd4	frizzled class receptor 4	Mus musculus frizzled class receptor 4 (Fzd4), mRNA [NM_008055]///frizzled class receptor 4 [Source:MGI Symbol;Acc:MGI:108520] [ENSMUST00000058755]	14366	NM_008055	ENSMUST00000058755
A_51_P430983,A_55_P1999666,A_52_P299627,A_51_P487219|26920	1.33075e-16	3.43535e-18	-2.84002	-1.17942	2.40797	-2.87102	-1.31548	2.18248	Cntrl	centriolin	Mus musculus centriolin (Cntrl), transcript variant 1, mRNA [NM_012018]///centriolin [Source:MGI Symbol;Acc:MGI:1889576] [ENSMUST00000028235]///Mus musculus centriolin (Cntrl), transcript variant 3, mRNA [NM_001290635]	26920	NM_012018///NM_001290635	ENSMUST00000124081///ENSMUST00000143807///ENSMUST00000028235///ENSMUST00000123884
A_52_P110088|66706	1.33234e-16	3.44475e-18	-2.00025	-1.26318	1.5835	-1.9891	-1.29256	1.53888	Ndufaf3	NADH dehydrogenase (ubiquinone) 1 alpha subcomplex, assembly factor 3	Mus musculus NADH dehydrogenase (ubiquinone) 1 alpha subcomplex, assembly factor 3 (Ndufaf3), mRNA [NM_023247]	66706	NM_023247	ENSMUST00000194666
A_55_P2026889,A_51_P219433|28077	1.3436e-16	3.4792e-18	1.79387	-1.06762	-1.91518	1.77314	1.04542	-1.6961	Med10	mediator complex subunit 10	mediator complex subunit 10 [Source:MGI Symbol;Acc:MGI:106331] [ENSMUST00000022089]///Mus musculus mediator complex subunit 10 (Med10), mRNA [NM_138596]	28077	XM_006517275///NM_138596	ENSMUST00000022089///ENSMUST00000221045
A_55_P2508519|100503474	1.34388e-16	3.48527e-18	-5.67336	-1.34767	4.20974	-5.20153	-1.59367	3.26387	Platr22	pluripotency associated transcript 22	Mus musculus pluripotency associated transcript 22 (Platr22), long non-coding RNA [NR_037986]	100503474	NR_037986
A_55_P1954081|69668	1.34656e-16	3.49755e-18	2.90698	1.21651	-2.38961	2.65349	1.26238	-2.10197	Ccdc115	coiled-coil domain containing 115	Mus musculus coiled-coil domain containing 115 (Ccdc115), mRNA [NM_027159]	69668	NM_027159	ENSMUST00000188583
A_51_P425824|67389	1.35721e-16	3.5306e-18	4.42934	2.73378	-1.62023	3.98062	2.84496	-1.39918	C1qtnf12	C1q and tumor necrosis factor related 12	Mus musculus family with sequence similarity 132, member A (Fam132a), mRNA [NM_026125]	67389	NM_026125	ENSMUST00000127222
A_66_P112164,A_55_P2077079|226422	1.35999e-16	3.54865e-18	-2.00769	1.16851	2.34601	-2.12789	1.10257	2.34614	Rab29	RAB29, member RAS oncogene family	Mus musculus RAB29, member RAS oncogene family (Rab29), mRNA [NM_144875]	226422	NM_144875	ENSMUST00000027693///ENSMUST00000112386
A_51_P296878|208820	1.35999e-16	3.54383e-18	-4.13502	-1.5372	2.68996	-3.87651	-1.66992	2.32138	Triqk	triple QxxK/R motif containing	Mus musculus triple QxxK/R motif containing (Triqk), transcript variant 1, mRNA [NM_173746]	208820	NM_173746	ENSMUST00000183345
A_52_P560146|195209	1.36025e-16	3.55472e-18	3.88131	-1.06937	-4.15057	4.14423	1.04296	-3.97353	Zfp469	zinc finger protein 469	PREDICTED: Mus musculus predicted gene 22 (Gm22), transcript variant X3, mRNA [XM_006531558]	195209	XM_006531558
A_55_P2727494,A_52_P30989,A_52_P30984|72391	1.4238e-16	3.72646e-18	-2.19014	-1.5173	1.44345	-2.22349	-1.57557	1.41123	Cdkn3	cyclin-dependent kinase inhibitor 3	Q810P3_MOUSE (Q810P3) Cdkn3 protein (CRL-1722 L5178Y-R cDNA, RIKEN full-length enriched library, clone:I730049M07 product:cyclin-dependent kinase inhibitor 3, full insert sequence), partial (65%) [TC1588266]///Mus musculus cyclin-dependent kinase inhibitor 3 (Cdkn3), mRNA [NM_028222]	72391	NM_028222	ENSMUST00000067426
A_55_P2798987,A_51_P353173|72722	1.43207e-16	3.7538e-18	2.04243	1.05333	-1.93902	1.86017	1.11462	-1.66888	Fam98a	family with sequence similarity 98, member A	Mus musculus family with sequence similarity 98, member A (Fam98a), mRNA [NM_133747]	72722	NM_133747	ENSMUST00000112507
A_51_P253803|17345	1.45922e-16	3.83075e-18	-1.76668	-1.06531	1.65837	-1.87366	-1.07606	1.74122	Mki67	antigen identified by monoclonal antibody Ki 67	Mus musculus antigen identified by monoclonal antibody Ki 67 (Mki67), mRNA [NM_001081117]	17345	NM_001081117	ENSMUST00000033310
A_52_P247353,A_52_P91235|12453	1.48372e-16	3.90097e-18	-1.81222	-1.17802	1.53836	-1.78434	-1.18087	1.51103	Ccni	cyclin I	Mus musculus cyclin I (Ccni), mRNA [NM_017367]	12453	NM_017367	ENSMUST00000151568///ENSMUST00000058550
A_55_P2515471,A_66_P100780|72425	1.51034e-16	3.98294e-18	2.36548	1.1606	-2.03815	2.5404	1.23155	-2.06276	Katnbl1	katanin p80 subunit B like 1	PREDICTED: Mus musculus katanin p80 subunit B like 1 (Katnbl1), transcript variant X1, mRNA [XM_006500235]///Mus musculus katanin p80 subunit B like 1 (Katnbl1), mRNA [NM_024254]	72425	XM_006500235///NM_024254	ENSMUST00000028552
A_55_P1990944|12362	1.51034e-16	3.97987e-18	-3.61204	1.02614	3.70645	-3.66878	-1.03333	3.55044	Casp1	caspase 1	Mus musculus caspase 1 (Casp1), mRNA [NM_009807]	12362	NM_009807	ENSMUST00000027015
A_52_P529486,A_51_P111455|70465	1.51521e-16	4.00181e-18	2.97054	1.24272	-2.39036	2.87982	1.31213	-2.19476	Wdr77	WD repeat domain 77	Mus musculus WD repeat domain 77 (Wdr77), mRNA [NM_027432]	70465	NM_027432	ENSMUST00000010278///ENSMUST00000127464
A_55_P2078780,A_55_P1959521|18612	1.52384e-16	4.03065e-18	2.46491	2.04187	-1.20718	2.2896	2.38688	1.04249	Etv4	ets variant 4	ets variant 4 [Source:MGI Symbol;Acc:MGI:99423] [ENSMUST00000164750]///Mus musculus ets variant 4 (Etv4), transcript variant 1, mRNA [NM_001316365]	18612	NM_001316365	ENSMUST00000164750///ENSMUST00000107176
A_51_P224517|269424	1.5587e-16	4.12905e-18	2.27187	1.24709	-1.82173	2.27944	1.20822	-1.88661	Jade1	jade family PHD finger 1	Mus musculus jade family PHD finger 1 (Jade1), transcript variant 1, mRNA [NM_172303]	269424	NM_172303	ENSMUST00000168086
A_66_P102885,A_55_P2158107|227674	1.57013e-16	4.16557e-18	2.72882	1.18025	-2.31207	2.82957	1.34508	-2.10364	Ddx31	DEAD/H (Asp-Glu-Ala-Asp/His) box polypeptide 31	Mus musculus DEAD/H (Asp-Glu-Ala-Asp/His) box polypeptide 31 (Ddx31), mRNA [NM_001033294]	227674	NM_001033294	ENSMUST00000147779///ENSMUST00000113853
A_55_P1968355,A_52_P328044,A_52_P330694|21885	1.5753e-16	4.18554e-18	1.81484	-1.08745	-1.97355	1.79743	-1.02335	-1.8394	Tle1	transducin-like enhancer of split 1	Mus musculus transducin-like enhancer of split 1 (Tle1), transcript variant 1, mRNA [NM_011599]///Mus musculus transducin-like enhancer of split 1 (Tle1), transcript variant 4, mRNA [NM_001285531]	21885	NM_011599///NM_001285531	ENSMUST00000102848///ENSMUST00000123259///ENSMUST00000107337
A_55_P2724544,A_52_P330214|14087	1.57726e-16	4.19926e-18	-1.67496	1.12557	1.88528	-1.72156	1.16775	2.01036	Fanca	Fanconi anemia, complementation group A	Mus musculus Fanconi anemia, complementation group A (Fanca), mRNA [NM_016925]	14087	NM_016925	ENSMUST00000212953///ENSMUST00000213090
A_55_P2324976|77675	1.57726e-16	4.20327e-18	-2.69372	-1.0434	2.58169	-2.88446	-1.09061	2.64481	5033406O09Rik	RIKEN cDNA 5033406O09 gene	Mus musculus RIKEN cDNA 5033406O09 gene (5033406O09Rik), long non-coding RNA [NR_029464]	77675	NR_029464
A_51_P279606|12703	1.58047e-16	4.2181e-18	4.12424	1.48948	-2.76892	4.49858	1.51624	-2.96693	Socs1	suppressor of cytokine signaling 1	Mus musculus suppressor of cytokine signaling 1 (Socs1), transcript variant 2, mRNA [NM_009896]	12703	NM_009896	ENSMUST00000038099
A_55_P2126780|72542	1.59195e-16	4.25507e-18	2.6774	1.05327	-2.54199	2.52801	1.08562	-2.32865	Pgam5	phosphoglycerate mutase family member 5	Mus musculus phosphoglycerate mutase family member 5 (Pgam5), transcript variant 1, mRNA [NM_001163538]	72542	NM_001163538	ENSMUST00000112505
A_55_P2173623,A_66_P125226|666704	1.60719e-16	4.30219e-18	-1.44518	-1.0486	1.37819	-1.48814	1.02966	1.53227	Samd1	sterile alpha motif domain containing 1	Mus musculus sterile alpha motif domain containing 1 (Samd1), mRNA [NM_001081415]///sterile alpha motif domain containing 1 [Source:MGI Symbol;Acc:MGI:2142433] [ENSMUST00000210523]	666704	NM_001081415	ENSMUST00000095228///ENSMUST00000210523
A_52_P147730,A_51_P253752,A_51_P436861,A_55_P2015700|213027	1.62806e-16	4.3645e-18	-1.95434	-1.32532	1.47461	-2.17909	-1.30573	1.66887	Evi5l	ecotropic viral integration site 5 like	Mus musculus ecotropic viral integration site 5 like (Evi5l), transcript variant 2, mRNA [NM_001346730]///Mus musculus ecotropic viral integration site 5 like (Evi5l), transcript variant 1, mRNA [NM_001039578]///ecotropic viral integration site 5 like [Source:MGI Symbol;Acc:MGI:2442167] [ENSMUST00000176645]	213027	NM_001346730///NM_001039578	ENSMUST00000175650///ENSMUST00000177053///ENSMUST00000176645///ENSMUST00000176764
A_51_P259726,A_55_P1986188|23854	1.67858e-16	4.50661e-18	-1.63255	-1.07272	1.52187	-1.66769	1.07502	1.7928	Def8	differentially expressed in FDCP 8	Mus musculus differentially expressed in FDCP 8 (Def8), transcript variant 3, mRNA [NM_054046]///Mus musculus differentially expressed in FDCP 8 (Def8), transcript variant 1, mRNA [NM_001253783]	23854	NM_054046///NM_001253783	ENSMUST00000108830
A_55_P2737657,A_52_P339996,A_52_P178151|21366	1.68059e-16	4.53204e-18	1.82139	1.64126	-1.10975	1.90268	1.59899	-1.18992	Slc6a6	solute carrier family 6 (neurotransmitter transporter, taurine), member 6	solute carrier family 6 (neurotransmitter transporter, taurine), member 6 [Source:MGI Symbol;Acc:MGI:98488] [ENSMUST00000206835]///Mus musculus solute carrier family 6 (neurotransmitter transporter, taurine), member 6 (Slc6a6), mRNA [NM_009320]	21366	NM_009320	ENSMUST00000206835///ENSMUST00000032185
A_52_P220879|21817	1.68059e-16	4.52346e-18	-2.15053	-3.78232	-1.75878	-2.17932	-4.49714	-2.06355	Tgm2	transglutaminase 2, C polypeptide	Mus musculus transglutaminase 2, C polypeptide (Tgm2), mRNA [NM_009373]	21817	NM_009373	ENSMUST00000103122
A_51_P324814|16668	1.68059e-16	4.52546e-18	3.74186	1.33098	-2.81135	3.29635	1.25915	-2.61793	Krt18	keratin 18	Mus musculus keratin 18 (Krt18), mRNA [NM_010664]	16668	NM_010664	ENSMUST00000023803
A_52_P679105|76453	1.69487e-16	4.57727e-18	2.11648	-1.19233	-2.52354	2.35726	-1.35626	-3.19707	Prss23	protease, serine 23	Mus musculus protease, serine 23 (Prss23), mRNA [NM_029614]	76453	NM_029614	ENSMUST00000207932
A_55_P2000658|626055	1.70288e-16	4.60568e-18	2.75684	1.1092	-2.48543	2.91422	1.18189	-2.46573	Gm15645	predicted gene 15645	Mus musculus predicted gene 15645 (Gm15645), long non-coding RNA [NR_033578]	626055	NR_033578	ENSMUST00000184198
A_51_P293753|66515	1.70688e-16	4.62326e-18	-2.11943	-1.25916	1.68321	-2.10468	-1.2766	1.64866	Cul7	cullin 7	Mus musculus cullin 7 (Cul7), mRNA [NM_025611]	66515	NM_025611	ENSMUST00000043464
A_66_P108316,A_51_P409893,A_55_P2855563,A_52_P584753|19087	1.73353e-16	4.70233e-18	3.07661	1.26675	-2.42875	3.15363	1.32769	-2.37528	Prkar2a	protein kinase, cAMP dependent regulatory, type II alpha	protein kinase, cAMP dependent regulatory, type II alpha [Source:MGI Symbol;Acc:MGI:108025] [ENSMUST00000035220]///Mus musculus protein kinase, cAMP dependent regulatory, type II alpha (Prkar2a), mRNA [NM_008924]///Q9CYV3_MOUSE (Q9CYV3) 10, 11 days embryo whole body cDNA, RIKEN full-length enriched library, clone:2810440D03 product:protein kinase, cAMP dependent regulatory, type II alpha, full in…	19087	NM_008924	ENSMUST00000035220///ENSMUST00000195263
A_51_P105604,A_55_P2799537,A_52_P403420|108664	1.74149e-16	4.73085e-18	2.20328	1.22885	-1.79296	2.19666	1.23927	-1.77254	Atp6v1h	ATPase, H+ transporting, lysosomal V1 subunit H	Mus musculus ATPase, H+ transporting, lysosomal V1 subunit H (Atp6v1h), transcript variant 1, mRNA [NM_133826]///ATPase, H+ transporting, lysosomal V1 subunit H [Source:MGI Symbol;Acc:MGI:1914864] [ENSMUST00000192142]	108664	NM_133826	ENSMUST00000192698///ENSMUST00000192847///ENSMUST00000192142
A_52_P153929,A_55_P1969341|237911	1.75929e-16	4.78617e-18	-2.24381	1.13122	2.53824	-2.40346	1.03043	2.47661	Brip1	BRCA1 interacting protein C-terminal helicase 1	Mus musculus BRCA1 interacting protein C-terminal helicase 1 (Brip1), mRNA [NM_178309]	237911	NM_178309	ENSMUST00000044423///ENSMUST00000149748
A_55_P2929465,A_55_P2029151,A_52_P231079|67826	1.76379e-16	4.80544e-18	-3.13699	-1.2334	2.54338	-3.238	-1.35701	2.38613	Snap47	synaptosomal-associated protein, 47	Mus musculus synaptosomal-associated protein, 47 (Snap47), mRNA [NM_144521]	67826	NM_144521	ENSMUST00000150297///ENSMUST00000120940///ENSMUST00000010038
A_55_P2326582,A_55_P2508173|67531	1.77359e-16	4.85327e-18	2.87422	2.30263	-1.24823	2.74909	2.46447	-1.11549	5730408K05Rik	RIKEN cDNA 5730408K05 gene	Mus musculus RIKEN cDNA 5730408K05 gene (5730408K05Rik), long non-coding RNA [NR_027866]	67531	NR_027866
A_52_P830312|216792	1.77359e-16	4.84402e-18	2.63122	1.32799	-1.98137	2.80074	1.46634	-1.91003	Iba57	IBA57 homolog, iron-sulfur cluster assembly	Mus musculus IBA57 homolog, iron-sulfur cluster assembly (Iba57), transcript variant 1, mRNA [NM_173785]	216792	NM_173785	ENSMUST00000054523
A_52_P513394,A_55_P2738137,A_51_P451106|12190	1.77359e-16	4.85092e-18	-3.40611	-1.18572	2.8726	-3.3081	-1.17896	2.80595	Brca2	breast cancer 2, early onset	Mus musculus breast cancer 2, early onset (Brca2), transcript variant 2, mRNA [NM_009765]///Mus musculus breast cancer 2, early onset (Brca2), transcript variant 1, mRNA [NM_001081001]	12190	NM_009765///NM_001081001	ENSMUST00000202192///ENSMUST00000202975///ENSMUST00000044620
A_66_P104483,A_52_P63343|229599	1.81899e-16	4.98544e-18	4.73955	1.14385	-4.14352	5.9804	1.4106	-4.2396	Ciart	circadian associated repressor of transcription	Mus musculus circadian associated repressor of transcription (Ciart), mRNA [NM_001033302]	229599	NM_001033302	ENSMUST00000161994///ENSMUST00000036418
A_55_P2816694,A_51_P352968|17118	1.81899e-16	4.99194e-18	-2.44486	-1.2454	1.9631	-2.3996	-1.19129	2.01429	Marcks	myristoylated alanine rich protein kinase C substrate	Mus musculus myristoylated alanine rich protein kinase C substrate (Marcks), mRNA [NM_008538]	17118	NM_008538	ENSMUST00000092584
A_52_P346113,A_52_P431139|14236	1.82678e-16	5.02059e-18	2.59251	1.3855	-1.87118	2.97344	1.35821	-2.18924	Foxn2	forkhead box N2	Mus musculus forkhead box N2 (Foxn2), mRNA [NM_180974]///forkhead box N2 [Source:MGI Symbol;Acc:MGI:1347478] [ENSMUST00000134107]	14236	NM_180974	ENSMUST00000112238///ENSMUST00000134107
A_51_P123345,A_55_P1958652|11841	1.82813e-16	5.03362e-18	1.99046	-1.30993	-2.60736	1.97753	-1.25168	-2.47522	Arf2	ADP-ribosylation factor 2	Mus musculus ADP-ribosylation factor 2 (Arf2), transcript variant 1, mRNA [NM_007477]	11841	NM_007477	ENSMUST00000063347
A_55_P2506450,A_55_P1985001,A_55_P2813676|12696	1.82813e-16	5.04607e-18	-3.20664	-1.38245	2.31953	-2.91976	-1.30999	2.22884	Cirbp	cold inducible RNA binding protein	Mus musculus cold inducible RNA binding protein (Cirbp), mRNA [NM_007705]///cold inducible RNA binding protein [Source:MGI Symbol;Acc:MGI:893588] [ENSMUST00000054666]	12696	NM_007705	ENSMUST00000154726///ENSMUST00000054666///ENSMUST00000105365
A_51_P457130|217370	1.82813e-16	5.04184e-18	2.07617	1.1144	-1.86303	2.01557	1.13249	-1.77976	BC017643	cDNA sequence BC017643	Mus musculus cDNA sequence BC017643 (BC017643), transcript variant 1, mRNA [NM_144832]	217370	NM_144832	ENSMUST00000038709
A_51_P108901|108673	1.85994e-16	5.14127e-18	2.26109	-1.38518	-3.132	2.4637	-1.07795	-2.65574	Ccdc86	coiled-coil domain containing 86	Mus musculus coiled-coil domain containing 86 (Ccdc86), mRNA [NM_023731]	108673	NM_023731	ENSMUST00000025639
A_55_P1990336|11518	1.87333e-16	5.2006e-18	-1.97577	-1.29594	1.52459	-2.12985	-1.36152	1.56432	Add1	adducin 1 (alpha)	Mus musculus adducin 1 (alpha) (Add1), transcript variant 4, mRNA [NM_001331080]	11518	NM_001331080	ENSMUST00000114335
A_65_P01608|13838	1.87333e-16	5.19668e-18	2.77515	-1.63704	-4.54303	2.65372	-1.96435	-5.21285	Epha4	Eph receptor A4	Mus musculus Eph receptor A4 (Epha4), mRNA [NM_007936]	13838	NM_007936	ENSMUST00000190149
A_51_P334942|11668	1.87333e-16	5.19132e-18	-1.87337	-1.55706	1.20314	-1.78237	-1.58471	1.12473	Aldh1a1	aldehyde dehydrogenase family 1, subfamily A1	Mus musculus aldehyde dehydrogenase family 1, subfamily A1 (Aldh1a1), mRNA [NM_013467]	11668	NM_013467	ENSMUST00000087638
A_55_P2104917,A_51_P260721|53885	1.8777e-16	5.22017e-18	-1.79029	-1.12788	1.5873	-1.75965	-1.12368	1.56597	Nphp1	nephronophthisis 1 (juvenile) homolog (human)	Mus musculus nephronophthisis 1 (juvenile) homolog (human) (Nphp1), transcript variant 3, mRNA [NM_001291013]///Mus musculus nephronophthisis 1 (juvenile) homolog (human) (Nphp1), transcript variant 1, mRNA [NM_016902]	53885	NM_001291013///NM_016902	ENSMUST00000110357
A_51_P341010,A_52_P471227,A_55_P2718994|71991	1.88102e-16	5.23689e-18	2.29535	1.09883	-2.08891	2.26289	1.2127	-1.86599	Ercc8	excision repaiross-complementing rodent repair deficiency, complementation group 8	Mus musculus excision repaiross-complementing rodent repair deficiency, complementation group 8 (Ercc8), mRNA [NM_028042]///excision repaiross-complementing rodent repair deficiency, complementation group 8 [Source:MGI Symbol;Acc:MGI:1919241] [ENSMUST00000137425]	71991	NM_028042	ENSMUST00000142931///ENSMUST00000123138///ENSMUST00000137425
A_51_P151182,A_55_P2032167|26388	1.88674e-16	5.26029e-18	2.0362	1.2019	-1.69415	2.22188	1.15234	-1.92815	Ifi202b	interferon activated gene 202B	Mus musculus interferon activated gene 202B (Ifi202b), transcript variant 2, mRNA [NM_011940]///Mus musculus interferon activated gene 202B (Ifi202b), transcript variant 1, mRNA [NM_008327]	26388	NM_011940///NM_008327	ENSMUST00000195502///ENSMUST00000000266
A_55_P2024580|94245	1.89087e-16	5.27933e-18	1.52128	-1.0724	-1.63143	1.56264	-1.10187	-1.72182	Dtnbp1	dystrobrevin binding protein 1	Mus musculus dystrobrevin binding protein 1 (Dtnbp1), mRNA [NM_025772]	94245	NM_025772	ENSMUST00000110128
A_55_P2096947|13874	1.90636e-16	5.33014e-18	4.67993	-1.69359	-7.9259	4.00404	-1.91517	-7.66842	Ereg	epiregulin	Mus musculus epiregulin (Ereg), mRNA [NM_007950]	13874	NM_007950	ENSMUST00000031324
A_51_P302538,A_55_P2027481|218699	1.91687e-16	5.36716e-18	-1.9498	-1.08318	1.80007	-1.96136	-1.15507	1.69805	Pxk	PX domain containing serine/threonine kinase	Mus musculus PX domain containing serine/threonine kinase (Pxk), transcript variant L, mRNA [NM_145458]///Mus musculus PX domain containing serine/threonine kinase (Pxk), transcript variant S, mRNA [NM_178279]	218699	NM_145458///NM_178279	ENSMUST00000112689
A_66_P102292,A_66_P108184,A_66_P116407|76273	1.95383e-16	5.47838e-18	2.3955	1.26774	-1.88958	2.6567	1.18161	-2.24836	Ndfip2	Nedd4 family interacting protein 2	AV365606 RIKEN full-length enriched, 16 days embryo lung Mus musculus cDNA clone 8430410A15 3'. [AV365606]///Mus musculus Nedd4 family interacting protein 2 (Ndfip2), transcript variant 2, mRNA [NM_001190989]///Mus musculus Nedd4 family interacting protein 2 (Ndfip2), transcript variant 1, mRNA [NM_029561]	76273	NM_001190989///NM_029561	ENSMUST00000127286
A_55_P1973906,A_51_P175580|60599	1.95996e-16	5.50335e-18	-3.84818	1.01169	3.89317	-3.56125	-1.17914	3.02022	Trp53inp1	transformation related protein 53 inducible nuclear protein 1	Mus musculus transformation related protein 53 inducible nuclear protein 1 (Trp53inp1), transcript variant 1, mRNA [NM_021897]	60599	NM_021897	ENSMUST00000132346///ENSMUST00000132010
A_55_P2007470,A_51_P370099|18590	1.96937e-16	5.53762e-18	1.80898	-1.25389	-2.26826	1.71035	-1.23221	-2.1075	Pdgfa	platelet derived growth factor, alpha	Mus musculus platelet derived growth factor, alpha (Pdgfa), mRNA [NM_008808]	18590	NM_008808	ENSMUST00000110897///ENSMUST00000144934
A_55_P2008106,A_51_P452302|72201	1.97351e-16	5.55707e-18	2.44073	1.30157	-1.87522	2.33312	1.43713	-1.62346	Otud6b	OTU domain containing 6B	Mus musculus OTU domain containing 6B (Otud6b), mRNA [NM_152812]	72201	NM_152812	ENSMUST00000117268///ENSMUST00000151012
A_55_P2807306|68010	2.00525e-16	5.65441e-18	-1.89904	-1.58473	1.19834	-1.96465	-1.73165	1.13455	Bambi	BMP and activin membrane-bound inhibitor	Mus musculus BMP and activin membrane-bound inhibitor (Bambi), mRNA [NM_026505]	68010	NM_026505	ENSMUST00000025075
A_52_P350512,A_55_P2125208|214855	2.0115e-16	5.68003e-18	2.3439	-1.36226	-3.19301	2.45355	-1.39968	-3.43419	Arid5a	AT rich interactive domain 5A (MRF1-like)	Mus musculus AT rich interactive domain 5A (MRF1-like) (Arid5a), transcript variant 3, mRNA [NM_145996]///Mus musculus AT rich interactive domain 5A (MRF1-like) (Arid5a), transcript variant 5, mRNA [NM_001290726]	214855	NM_145996///NM_001290726	ENSMUST00000124280///ENSMUST00000115031
A_52_P430628|19352	2.0554e-16	5.81216e-18	1.8268	1.15152	-1.58642	1.88577	1.08669	-1.73533	Rabggtb	Rab geranylgeranyl transferase, b subunit	Mus musculus Rab geranylgeranyl transferase, b subunit (Rabggtb), transcript variant 1, mRNA [NM_011231]	19352	NM_011231	ENSMUST00000198094
A_55_P2144636,A_55_P2269700|68394	2.05782e-16	5.82717e-18	-1.47617	1.38542	2.04511	-1.38687	1.35382	1.87756	Ccdc163	coiled-coil domain containing 163	Mus musculus coiled-coil domain containing 163 (Ccdc163), mRNA [NM_026714]	68394	NM_026714	ENSMUST00000030452///ENSMUST00000135499
A_55_P2340101|102643247	2.06471e-16	5.88267e-18	3.27659	1.49131	-2.19712	3.47646	1.90986	-1.82027	LOC102643247	uncharacterized LOC102643247	PREDICTED: Mus musculus uncharacterized LOC102643247 (LOC102643247), ncRNA [XR_867954]	102643247	XR_867954
A_51_P112100|68127	2.06471e-16	5.8765e-18	-2.4478	1.23619	3.02594	-2.30141	1.11049	2.55568	B230217C12Rik	RIKEN cDNA B230217C12 gene	Mus musculus RIKEN cDNA B230217C12 gene (B230217C12Rik), mRNA [NM_001080935]	68127	NM_001080935	ENSMUST00000054783
A_55_P1967613,A_55_P2145496,A_51_P139069|54636	2.06471e-16	5.8877e-18	-2.82247	-1.28543	2.19574	-2.6491	-1.33656	1.98203	Wdr45	WD repeat domain 45	WD repeat domain 45 [Source:MGI Symbol;Acc:MGI:1859606] [ENSMUST00000137470]///Mus musculus WD repeat domain 45 (Wdr45), transcript variant 1, mRNA [NM_001290792]///Mus musculus WD repeat domain 45 (Wdr45), transcript variant 2, mRNA [NM_172372]	54636	NM_001290792///NM_172372	ENSMUST00000137470///ENSMUST00000043045///ENSMUST00000115688
A_66_P110292,A_51_P217465|212632	2.06471e-16	5.86478e-18	3.58694	1.33627	-2.6843	3.51721	1.42826	-2.46259	Iffo2	intermediate filament family orphan 2	Mus musculus intermediate filament family orphan 2 (Iffo2), transcript variant 1, mRNA [NM_001205173]///Mus musculus intermediate filament family orphan 2 (Iffo2), transcript variant 2, mRNA [NM_183148]	212632	NM_001205173///NM_183148	ENSMUST00000040023///ENSMUST00000123827
A_66_P103201,A_55_P2884008|20877	2.06471e-16	5.85766e-18	-1.87281	1.03459	1.93759	-1.90522	1.02564	1.95406	Aurkb	aurora kinase B	Mus musculus aurora kinase B (Aurkb), mRNA [NM_011496]	20877	NM_011496	ENSMUST00000139594///ENSMUST00000021277
A_51_P303180,A_55_P2728588|68303	2.06545e-16	5.89801e-18	-2.55439	-1.37754	1.85431	-2.39191	-1.62608	1.47097	Fam114a1	family with sequence similarity 114, member A1	Mus musculus family with sequence similarity 114, member A1 (Fam114a1), mRNA [NM_026667]///TN13B_MOUSE (Q9WU72) Tumor necrosis factor ligand superfamily member 13B (B cell-activating factor) (BAFF) (CD257 antigen) [Contains: Tumor necrosis factor ligand superfamily member 13b, membrane form; Tumor necrosis factor ligand superfamily member 13b,, partial (6%) [TC1633965]	68303	NM_026667	ENSMUST00000031080
A_55_P1952744|30058	2.10347e-16	6.01492e-18	1.92634	1.29887	-1.48309	1.98911	1.53858	-1.29282	Timm8a1	translocase of inner mitochondrial membrane 8A1	Mus musculus translocase of inner mitochondrial membrane 8A1 (Timm8a1), mRNA [NM_013898]	30058	NM_013898	ENSMUST00000054213
A_55_P2880322|100038453	2.14827e-16	6.15156e-18	-5.20422	1.236	6.4324	-6.27246	-1.16968	5.36257	Gm12522	predicted gene 12522	Mus musculus predicted gene 12522 (Gm12522), long non-coding RNA [NR_040560]	100038453	NR_040560
A_55_P1953301,A_51_P273596|20322	2.15662e-16	6.18404e-18	-2.1044	-1.16239	1.81042	-2.12254	-1.31053	1.6196	Sord	sorbitol dehydrogenase	Mus musculus sorbitol dehydrogenase (Sord), mRNA [NM_146126]	20322	NM_146126	ENSMUST00000110551
A_55_P1979403|319801	2.1932e-16	6.29765e-18	3.81049	1.23581	-3.0834	4.15331	1.43145	-2.90148	Tigar	Trp53 induced glycolysis repulatory phosphatase	Mus musculus Trp53 induced glycolysis repulatory phosphatase (Tigar), mRNA [NM_177003]	319801	NM_177003	ENSMUST00000039913
A_52_P373973|240396	2.19945e-16	6.32433e-18	1.92783	1.27108	-1.51669	1.96834	1.21355	-1.62197	Mex3c	mex3 RNA binding family member C	Mus musculus mex3 RNA binding family member C (Mex3c), mRNA [NM_001039214]	240396	NM_001039214	ENSMUST00000091852
A_52_P555537,A_55_P2214884|76972	2.20187e-16	6.34003e-18	2.90087	3.37546	1.1636	2.86889	3.42289	1.19311	Snhg20	small nucleolar RNA host gene 20	Mus musculus small nucleolar RNA host gene 20 (Snhg20), long non-coding RNA [NR_027059]	76972	NR_027059
A_55_P2187121|664862	2.21762e-16	6.39419e-18	3.38448	1.60554	-2.10799	3.5181	1.78813	-1.96748	Gpr137b-ps	G protein-coupled receptor 137B, pseudogene	Mus musculus G protein-coupled receptor 137B, pseudogene (Gpr137b-ps), non-coding RNA [NR_003568]	664862	NR_003568	ENSMUST00000220758
A_55_P2002703	2.25418e-16	6.50855e-18	2.43106	1.303	-1.86574	2.52065	1.43902	-1.75164
A_65_P04750,A_55_P2742211,A_65_P07021,A_55_P2729175|51886	2.2928e-16	6.63827e-18	2.18292	-1.14847	-2.50701	2.23914	-1.08193	-2.4226	Fubp1	far upstream element (FUSE) binding protein 1	Mus musculus far upstream element (FUSE) binding protein 1 (Fubp1), mRNA [NM_057172]///far upstream element (FUSE) binding protein 1 [Source:MGI Symbol;Acc:MGI:1196294] [ENSMUST00000198227]	51886	NM_057172	ENSMUST00000166984///ENSMUST00000196739///ENSMUST00000198227///ENSMUST00000199202
A_51_P180724|17350	2.2928e-16	6.63001e-18	-2.84262	-1.00716	2.82243	-3.24007	-1.12334	2.88432	Mlh1	mutL homolog 1	Mus musculus mutL homolog 1 (Mlh1), transcript variant 1, mRNA [NM_026810]	17350	NM_026810	ENSMUST00000035079
A_55_P2720482,A_55_P2011747|224092	2.3118e-16	6.70246e-18	1.91997	1.11842	-1.71669	2.0084	1.17603	-1.70777	Lsg1	large 60S subunit nuclear export GTPase 1	large 60S subunit nuclear export GTPase 1 [Source:MGI Symbol;Acc:MGI:107236] [ENSMUST00000124858]///Mus musculus large 60S subunit nuclear export GTPase 1 (Lsg1), mRNA [NM_178069]	224092	NM_178069	ENSMUST00000124858///ENSMUST00000143170
A_55_P2038303	2.31644e-16	6.73431e-18	3.94565	1.25348	-3.14775	3.76623	1.39796	-2.6941			Q80U76_MOUSE (Q80U76) MKIAA0112 protein (Fragment), partial (77%) [TC1637523]
A_55_P2011937,A_55_P2714169,A_55_P2596047,A_55_P2732962|60530	2.31644e-16	6.72694e-18	-1.39516	1.13963	1.58996	-1.57244	1.06444	1.67377	Fignl1	fidgetin-like 1	Mus musculus fidgetin-like 1 (Fignl1), transcript variant 1, mRNA [NM_001163359]///fidgetin-like 1 [Source:MGI Symbol;Acc:MGI:1890648] [ENSMUST00000152345]///fidgetin-like 1 [Source:MGI Symbol;Acc:MGI:1890648] [ENSMUST00000123815]	60530	NM_001163359	ENSMUST00000109664///ENSMUST00000152345///ENSMUST00000150714///ENSMUST00000123815
A_55_P2214408|100125931	2.32552e-16	6.76996e-18	4.89972	1.6701	-2.93379	4.77772	1.67274	-2.85622	Phtf1os	putative homeodomain transcription factor 1, opposite strand	Mus musculus putative homeodomain transcription factor 1, opposite strand (Phtf1os), long non-coding RNA [NR_030676]	100125931	NR_030676
A_52_P118161,A_55_P2807240,A_51_P296487|16987	2.3466e-16	6.84996e-18	-1.18056	-2.39955	-2.03255	-1.17416	-2.63279	-2.24228	Lss	lanosterol synthase	Mus musculus lanosterol synthase (Lss), mRNA [NM_146006]	16987	NM_146006	ENSMUST00000160671///ENSMUST00000048678
A_51_P198114,A_51_P187750|214854	2.3466e-16	6.84911e-18	-3.60667	-2.24128	1.6092	-5.01213	-2.65015	1.89126	Neurl3	neuralized E3 ubiquitin protein ligase 3	neuralized E3 ubiquitin protein ligase 3 [Source:MGI Symbol;Acc:MGI:2429944] [ENSMUST00000188666]///Mus musculus neuralized E3 ubiquitin protein ligase 3 (Neurl3), mRNA [NM_153408]	214854	NM_153408	ENSMUST00000188666///ENSMUST00000056946
A_65_P11857,A_66_P110302,A_51_P479043,A_55_P2100809|65102	2.36873e-16	6.92396e-18	1.81215	1.08949	-1.6633	1.8739	1.28773	-1.45519	Nif3l1	Ngg1 interacting factor 3-like 1 (S. pombe)	Mus musculus Ngg1 interacting factor 3-like 1 (S. pombe) (Nif3l1), mRNA [NM_022988]///Ngg1 interacting factor 3-like 1 (S. pombe) [Source:MGI Symbol;Acc:MGI:1929485] [ENSMUST00000114337]	65102	NM_022988	ENSMUST00000140723///ENSMUST00000151272///ENSMUST00000171597///ENSMUST00000114337
A_51_P331207|66279	2.37454e-16	6.95039e-18	-3.51534	-1.47875	2.37724	-4.40738	-1.85281	2.37875	Tmem218	transmembrane protein 218	Mus musculus transmembrane protein 218 (Tmem218), transcript variant 2, mRNA [NM_025464]	66279	NM_025464	ENSMUST00000034632
A_55_P2079860|230837	2.3883e-16	7.00013e-18	-4.91222	-1.29856	3.78284	-4.95137	-1.57798	3.13779	Asap3	ArfGAP with SH3 domain, ankyrin repeat and PH domain 3	Mus musculus ArfGAP with SH3 domain, ankyrin repeat and PH domain 3 (Asap3), mRNA [NM_001008232]	230837	NM_001008232	ENSMUST00000047526
A_52_P365660|241568	2.39884e-16	7.04058e-18	-5.44364	1.02419	5.57532	-8.29136	-1.24086	6.68194	Lrrc4c	leucine rich repeat containing 4C	Mus musculus leucine rich repeat containing 4C (Lrrc4c), transcript variant 3, mRNA [NM_178725]	241568	NM_178725	ENSMUST00000162807
A_51_P345896|100163	2.42414e-16	7.13406e-18	-1.83081	1.03987	1.90381	-1.86785	1.07702	2.01172	Pafah2	platelet-activating factor acetylhydrolase 2	Mus musculus platelet-activating factor acetylhydrolase 2 (Pafah2), transcript variant 2, mRNA [NM_133880]	100163	NM_133880	ENSMUST00000105870
A_51_P286488|15937	2.42414e-16	7.12592e-18	-1.86256	-2.42651	-1.30278	-1.63003	-2.8229	-1.73181	Ier3	immediate early response 3	Mus musculus immediate early response 3 (Ier3), mRNA [NM_133662]	15937	NM_133662	ENSMUST00000003635
A_52_P125795,A_51_P411345|233549	2.44678e-16	7.21043e-18	-2.83556	-1.40275	2.02142	-2.71208	-1.4877	1.82299	Mogat2	monoacylglycerol O-acyltransferase 2	monoacylglycerol O-acyltransferase 2 [Source:MGI Symbol;Acc:MGI:2663253] [ENSMUST00000132343]///Mus musculus monoacylglycerol O-acyltransferase 2 (Mogat2), mRNA [NM_177448]	233549	NM_177448	ENSMUST00000132343///ENSMUST00000064231
A_65_P17358,A_55_P1998539|56745	2.45491e-16	7.24563e-18	-4.86654	-1.2954	3.7568	-5.40136	-1.50468	3.5897	C1qtnf1	C1q and tumor necrosis factor related protein 1	Mus musculus C1q and tumor necrosis factor related protein 1 (C1qtnf1), transcript variant 1, mRNA [NM_001204129]	56745	NM_001204129	ENSMUST00000017590
A_66_P138257,A_51_P340947|223776	2.45491e-16	7.25387e-18	-2.52262	-1.01353	2.48894	-2.8125	-1.25654	2.2383	Selenoo	selenoprotein O	selenoprotein O [Source:MGI Symbol;Acc:MGI:1919007] [ENSMUST00000130700]///Mus musculus selenoprotein O (Selenoo), mRNA [NM_027905]	223776	NM_027905	ENSMUST00000130700///ENSMUST00000082439
A_55_P2019327,A_55_P1970033|18626	2.46137e-16	7.28273e-18	-2.99869	-1.57513	1.90376	-3.04088	-1.82585	1.66547	Per1	period circadian clock 1	period circadian clock 1 [Source:MGI Symbol;Acc:MGI:1098283] [ENSMUST00000101004]///Mus musculus period circadian clock 1 (Per1), transcript variant 1, mRNA [NM_011065]	18626	NM_011065	ENSMUST00000101004///ENSMUST00000166748
A_55_P2858950|67920	2.4811e-16	7.35097e-18	3.09501	1.32216	-2.34087	2.81667	1.26877	-2.22	Mak16	MAK16 homolog	Mus musculus MAK16 homolog (Mak16), mRNA [NM_026453]	67920	NM_026453	ENSMUST00000033983
A_55_P2738758,A_51_P320137,A_55_P2010111|80292	2.53821e-16	7.53026e-18	1.93181	1.10013	-1.75599	1.86462	1.16812	-1.59625	Zxdc	ZXD family zinc finger C	Mus musculus ZXD family zinc finger C (Zxdc), transcript variant 2, mRNA [NM_173002]///Mus musculus ZXD family zinc finger C (Zxdc), transcript variant 1, mRNA [NM_030260]	80292	NM_173002///NM_030260	ENSMUST00000045740///ENSMUST00000203493
A_51_P479464,A_55_P2728550,A_51_P158388,A_55_P2729095|78334	2.58144e-16	7.66875e-18	-2.74504	-1.04338	2.63091	-2.87535	-1.11898	2.56963	Cdk19	cyclin-dependent kinase 19	Mus musculus cyclin-dependent kinase 19 (Cdk19), transcript variant 1, mRNA [NM_001168304]///Mus musculus cyclin-dependent kinase 19 (Cdk19), transcript variant 2, mRNA [NM_198164]	78334	NM_001168304///NM_198164	ENSMUST00000044672///ENSMUST00000214659///ENSMUST00000216736
A_55_P2935401,A_55_P2714000|208228	2.58366e-16	7.68563e-18	1.6872	-1.36507	-2.30314	1.83972	-1.25389	-2.30681	Mob3a	MOB kinase activator 3A	MOB kinase activator 3A [Source:MGI Symbol;Acc:MGI:3050117] [ENSMUST00000218439]///Mus musculus MOB kinase activator 3A (Mob3a), mRNA [NM_172457]	208228	NM_172457	ENSMUST00000218439///ENSMUST00000003438
A_51_P413111,A_55_P2729070,A_55_P2490344|242083	2.58685e-16	7.70537e-18	1.94965	1.151	-1.69388	1.81675	1.0738	-1.69188	Ppm1l	protein phosphatase 1 (formerly 2C)-like	protein phosphatase 1 (formerly 2C)-like [Source:MGI Symbol;Acc:MGI:2139740] [ENSMUST00000029355]///Mus musculus protein phosphatase 1 (formerly 2C)-like (Ppm1l), mRNA [NM_178726]	242083	XM_011240119///NM_178726	ENSMUST00000029355
A_30_P01029192	2.60301e-16	7.76384e-18	-2.4584	-1.10614	2.22249	-2.43709	-1.06572	2.28681			lincRNA:chr9:88575075-88611650 reverse strand
A_55_P2159234|381801	2.65461e-16	7.9283e-18	2.44235	-1.08111	-2.64045	2.40825	1.01976	-2.36158	Tatdn2	TatD DNase domain containing 2	Mus musculus TatD DNase domain containing 2 (Tatdn2), transcript variant 1, mRNA [NM_001347356]	381801	NM_001347356	ENSMUST00000113022
A_55_P2135880|67030	2.6731e-16	7.99415e-18	-1.98239	-1.23934	1.59956	-2.0307	-1.27683	1.59043	Fancl	Fanconi anemia, complementation group L	Mus musculus Fanconi anemia, complementation group L (Fancl), transcript variant 1, mRNA [NM_025923]	67030	NM_025923	ENSMUST00000109509
A_65_P10780,A_52_P305995|56068	2.68154e-16	8.03003e-18	2.02692	-1.24487	-2.52325	2.10315	-1.16551	-2.45123	Ammecr1	Alport syndrome, mental retardation, midface hypoplasia and elliptocytosis chromosomal region gene 1	Alport syndrome, mental retardation, midface hypoplasia and elliptocytosis chromosomal region gene 1 [Source:MGI Symbol;Acc:MGI:1860206] [ENSMUST00000041317]///Mus musculus Alport syndrome, mental retardation, midface hypoplasia and elliptocytosis chromosomal region gene 1 (Ammecr1), mRNA [NM_019496]	56068	NM_019496	ENSMUST00000041317
A_66_P139033,A_55_P2935266,A_55_P2060966|17454	2.68312e-16	8.04542e-18	-3.0433	1.04789	3.18906	-3.14346	1.05079	3.30312	Mov10	Moloney leukemia virus 10	Mus musculus Moloney leukemia virus 10 (Mov10), transcript variant 1, mRNA [NM_001163440]///Moloney leukemia virus 10 [Source:MGI Symbol;Acc:MGI:97054] [ENSMUST00000196211]	17454	NM_001163440	ENSMUST00000106774///ENSMUST00000196211
A_51_P138760|19300	2.69536e-16	8.0942e-18	-2.27318	-1.03576	2.19469	-2.47129	-1.18665	2.08258	Abcd4	ATP-binding cassette, sub-family D (ALD), member 4	Mus musculus ATP-binding cassette, sub-family D (ALD), member 4 (Abcd4), mRNA [NM_008992]	19300	NM_008992	ENSMUST00000021666
A_52_P387009|112407	2.69536e-16	8.10352e-18	3.71456	2.56488	-1.44824	3.19035	2.48833	-1.28213	Egln3	egl-9 family hypoxia-inducible factor 3	Mus musculus egl-9 family hypoxia-inducible factor 3 (Egln3), mRNA [NM_028133]	112407	NM_028133	ENSMUST00000039516
A_55_P2500104,A_52_P63905|13195	2.72034e-16	8.18942e-18	1.55765	-1.49015	-2.32113	1.34736	-1.6397	-2.20927	Ddc	dopa decarboxylase	Mus musculus dopa decarboxylase (Ddc), transcript variant 1, mRNA [NM_001190448]///Mus musculus dopa decarboxylase (Ddc), transcript variant 2, mRNA [NM_016672]	13195	NM_001190448///NM_016672	ENSMUST00000109659///ENSMUST00000134121
A_51_P228171,A_55_P2073208|66336	2.73169e-16	8.23446e-18	-2.5942	-1.10241	2.35322	-2.38913	-1.13791	2.09958	Cenpp	centromere protein P	Mus musculus centromere protein P (Cenpp), mRNA [NM_025495]///centromere protein P [Source:MGI Symbol;Acc:MGI:1913586] [ENSMUST00000221751]	66336	NM_025495///XR_873273	ENSMUST00000021818///ENSMUST00000221751
A_55_P2484166,A_66_P116083|16832	2.74577e-16	8.28779e-18	-1.71293	-1.34668	1.27196	-1.69867	-1.39493	1.21774	Ldhb	lactate dehydrogenase B	Mus musculus lactate dehydrogenase B (Ldhb), transcript variant 1, mRNA [NM_001316322]///Mus musculus lactate dehydrogenase B (Ldhb), transcript variant 2, mRNA [NM_001302765]	16832	NM_001316322///NM_001302765	ENSMUST00000032373///ENSMUST00000134191
A_52_P152219,A_52_P24320|244585	2.74813e-16	8.30583e-18	-2.7643	-1.17514	2.35231	-3.05936	-1.26256	2.42315	Rpgrip1l	Rpgrip1-like	Mus musculus Rpgrip1-like (Rpgrip1l), mRNA [NM_173431]	244585	NM_173431	ENSMUST00000047783///ENSMUST00000132757
A_52_P405177|72709	2.75925e-16	8.3504e-18	-3.05016	-1.24999	2.44015	-2.97571	-1.20071	2.47829	C1qtnf6	C1q and tumor necrosis factor related protein 6	Mus musculus C1q and tumor necrosis factor related protein 6 (C1qtnf6), transcript variant 1, mRNA [NM_028331]	72709	NM_028331	ENSMUST00000023075
A_51_P449935,A_66_P139089,A_55_P2829851|56095	2.75971e-16	8.37372e-18	2.05912	1.05679	-1.94847	2.06	1.16251	-1.77202	Ftsj3	FtsJ RNA methyltransferase homolog 3 (E. coli)	Mus musculus FtsJ RNA methyltransferase homolog 3 (E. coli) (Ftsj3), mRNA [NM_025310]	56095	NM_025310	ENSMUST00000126938///ENSMUST00000021048///ENSMUST00000154635
A_30_P01030698	2.75971e-16	8.36696e-18	-2.48551	-1.15859	2.14529	-2.37232	-1.3226	1.79368			lincRNA:chr11:16831925-16851121 reverse strand
A_52_P307142|73652	2.76837e-16	8.41101e-18	-3.50848	-1.01764	3.44766	-3.73906	-1.04112	3.59137	2210408F21Rik	RIKEN cDNA 2210408F21 gene	Mus musculus RIKEN cDNA 2210408F21 gene (2210408F21Rik), transcript variant 3, long non-coding RNA [NR_040259]	73652	NR_040259
A_66_P136674|12778	2.78055e-16	8.45903e-18	1.5278	-1.33662	-2.04208	1.59139	-1.46793	-2.33604	Ackr3	atypical chemokine receptor 3	Mus musculus atypical chemokine receptor 3 (Ackr3), transcript variant 1, mRNA [NM_001271607]	12778	NM_001271607	ENSMUST00000065587
A_51_P380587|74470	2.80673e-16	8.54983e-18	-4.30045	-1.0225	4.20584	-4.1022	-1.0871	3.77354	Cep72	centrosomal protein 72	Mus musculus centrosomal protein 72 (Cep72), mRNA [NM_028959]	74470	NM_028959	ENSMUST00000221122
A_52_P379337,A_52_P1180449,A_65_P02000|68585	2.81073e-16	8.57317e-18	2.48263	1.37951	-1.79965	2.61489	1.31672	-1.98592	Rtn4	reticulon 4	Mus musculus reticulon 4 (Rtn4), transcript variant 1, mRNA [NM_194054]	68585	NM_194054	ENSMUST00000170731///ENSMUST00000102843
A_65_P17773,A_55_P1959006,A_55_P2717324|27993	2.83836e-16	8.66872e-18	2.09585	1.11176	-1.88516	2.03452	1.33727	-1.5214	Imp4	IMP4, U3 small nucleolar ribonucleoprotein	IMP4, U3 small nucleolar ribonucleoprotein [Source:MGI Symbol;Acc:MGI:106572] [ENSMUST00000027303]///Mus musculus IMP4, U3 small nucleolar ribonucleoprotein (Imp4), mRNA [NM_178601]///IMP4, U3 small nucleolar ribonucleoprotein [Source:MGI Symbol;Acc:MGI:106572] [ENSMUST00000187077]	27993	NM_178601	ENSMUST00000027303///ENSMUST00000187077
A_66_P115863,A_55_P1975360,A_51_P244504|72284	2.86228e-16	8.75316e-18	1.93667	1.32589	-1.46066	1.95736	1.42797	-1.37073	Oraov1	oral cancer overexpressed 1	Mus musculus oral cancer overexpressed 1 (Oraov1), transcript variant 1, mRNA [NM_001347536]///Mus musculus oral cancer overexpressed 1 (Oraov1), transcript variant 2, mRNA [NM_028184]	72284	NM_001347536///NM_028184	ENSMUST00000128057///ENSMUST00000105895///ENSMUST00000033388
A_52_P499028|71583	2.86355e-16	8.7684e-18	3.10216	1.38824	-2.2346	3.09139	1.23316	-2.50689	9130008F23Rik	RIKEN cDNA 9130008F23 gene	Mus musculus RIKEN cDNA 9130008F23 gene (9130008F23Rik), mRNA [NM_027834]	71583	NM_027834	ENSMUST00000068258
A_55_P1998797	2.89091e-16	8.86366e-18	2.5717	1.06172	-2.4222	2.90944	1.12059	-2.59635			predicted gene 15470 [Source:MGI Symbol;Acc:MGI:3641891] [ENSMUST00000119135]			ENSMUST00000119135
A_51_P114910|13014	2.91733e-16	8.95624e-18	1.45935	-1.14687	-1.67368	1.57469	-1.14139	-1.79734	Cstb	cystatin B	Mus musculus cystatin B (Cstb), mRNA [NM_007793]	13014	NM_007793	ENSMUST00000005185
A_51_P208355|66634	2.93563e-16	9.02411e-18	-2.03847	1.2045	2.45534	-2.03598	1.08041	2.19968	Mcm8	minichromosome maintenance 8 homologous recombination repair factor	Mus musculus minichromosome maintenance 8 homologous recombination repair factor (Mcm8), transcript variant 2, mRNA [NM_025676]	66634	NM_025676	ENSMUST00000028831
A_52_P392674,A_66_P103099|56360	2.9633e-16	9.12092e-18	1.75625	1.15556	-1.51983	1.89186	1.30439	-1.45038	Acot9	acyl-CoA thioesterase 9	Mus musculus acyl-CoA thioesterase 9 (Acot9), transcript variant 1, mRNA [NM_019736]///Mus musculus acyl-CoA thioesterase 9 (Acot9), transcript variant 2, mRNA [NM_001313718]	56360	NM_019736///NM_001313718	ENSMUST00000126200///ENSMUST00000131332
A_55_P1994275,A_51_P274992|68147	2.96541e-16	9.1392e-18	1.81871	1.09638	-1.65883	1.91029	1.16468	-1.64019	Gar1	GAR1 ribonucleoprotein	Mus musculus GAR1 ribonucleoprotein (Gar1), mRNA [NM_026578]	68147	NM_026578	ENSMUST00000143545///ENSMUST00000149071
A_55_P2165539,A_55_P2165544|11569	2.97967e-16	9.19498e-18	2.34802	1.23341	-1.90368	2.35131	1.1297	-2.08136	Aebp2	AE binding protein 2	Mus musculus AE binding protein 2 (Aebp2), transcript variant 3, mRNA [NM_009637]///Mus musculus AE binding protein 2 (Aebp2), transcript variant 1, mRNA [NM_001005605]	11569	NM_009637///NM_001005605	ENSMUST00000160772///ENSMUST00000032359
A_51_P464738|20525	2.98463e-16	9.22212e-18	3.00115	1.85932	-1.61411	3.11812	1.61223	-1.93404	Slc2a1	solute carrier family 2 (facilitated glucose transporter), member 1	Mus musculus solute carrier family 2 (facilitated glucose transporter), member 1 (Slc2a1), mRNA [NM_011400]	20525	NM_011400	ENSMUST00000174372
A_52_P32893,A_55_P2644191|93790	3.00657e-16	9.30925e-18	2.23451	1.0874	-2.05491	2.29955	1.12573	-2.04271	Nipa2	non imprinted in Prader-Willi/Angelman syndrome 2 homolog (human)	Mus musculus non imprinted in Prader-Willi/Angelman syndrome 2 homolog (human) (Nipa2), transcript variant 1, mRNA [NM_023647]///Mus musculus non imprinted in Prader-Willi/Angelman syndrome 2 homolog (human) (Nipa2), transcript variant 2, mRNA [NM_001256130]	93790	NM_023647///NM_001256130	ENSMUST00000119201///ENSMUST00000143325
A_52_P113129,A_55_P1982733,A_55_P1982732|13002	3.00657e-16	9.3138e-18	2.21359	1.20269	-1.84053	2.16458	1.18	-1.83438	Dnajc5	DnaJ heat shock protein family (Hsp40) member C5	Mus musculus DnaJ heat shock protein family (Hsp40) member C5 (Dnajc5), transcript variant 3, mRNA [NM_016775]///Mus musculus DnaJ heat shock protein family (Hsp40) member C5 (Dnajc5), transcript variant 1, mRNA [NM_001271585]///DnaJ heat shock protein family (Hsp40) member C5 [Source:MGI Symbol;Acc:MGI:892995] [ENSMUST00000108796]	13002	NM_016775///NM_001271585	ENSMUST00000108797///ENSMUST00000108796
A_55_P2922195,A_55_P2762329|56353	3.01853e-16	9.36926e-18	2.75301	1.10852	-2.48351	2.85065	1.27084	-2.24313	Rybp	RING1 and YY1 binding protein	Mus musculus RING1 and YY1 binding protein (Rybp), mRNA [NM_019743]	56353	NM_019743	ENSMUST00000101118
A_52_P496810,A_51_P473219|22619	3.01853e-16	9.37485e-18	-2.77298	-1.38341	2.00446	-3.04993	-1.62518	1.87667	Siae	sialic acid acetylesterase	Mus musculus sialic acid acetylesterase (Siae), mRNA [NM_011734]	22619	NM_011734	ENSMUST00000217567///ENSMUST00000002007
A_52_P237792,A_51_P502152|20509	3.01906e-16	9.38849e-18	3.79982	1.28429	-2.9587	4.02719	1.49226	-2.69871	Slc19a1	solute carrier family 19 (folate transporter), member 1	Mus musculus solute carrier family 19 (folate transporter), member 1 (Slc19a1), transcript variant 1, mRNA [NM_031196]	20509	NM_031196	ENSMUST00000133059///ENSMUST00000105410
A_55_P1981959|231712	3.05907e-16	9.52505e-18	-1.8764	-1.29489	1.44908	-1.81524	-1.23564	1.46906	Trafd1	TRAF type zinc finger domain containing 1	Mus musculus TRAF type zinc finger domain containing 1 (Trafd1), transcript variant 1, mRNA [NM_001163470]	231712	NM_001163470	ENSMUST00000202064
A_55_P2742860|72155	3.09079e-16	9.63608e-18	-1.67655	1.01385	1.69977	-1.74057	-1.03471	1.68219	Cenpn	centromere protein N	Mus musculus centromere protein N (Cenpn), mRNA [NM_028131]	72155	NM_028131	ENSMUST00000034205
A_51_P494863|106639	3.19178e-16	9.96361e-18	-3.64443	-1.23514	2.95063	-4.07708	-1.51231	2.69593	Vmac	vimentin-type intermediate filament associated coiled-coil protein	Mus musculus vimentin-type intermediate filament associated coiled-coil protein (Vmac), transcript variant 1, mRNA [NM_178926]	106639	NM_178926	ENSMUST00000067931
A_55_P2499553,A_51_P267454|67863	3.24889e-16	1.01548e-17	-1.79681	-1.07069	1.67818	-1.80481	-1.02592	1.75921	Slc25a11	solute carrier family 25 (mitochondrial carrier oxoglutarate carrier), member 11	Mus musculus solute carrier family 25 (mitochondrial carrier oxoglutarate carrier), member 11 (Slc25a11), mRNA [NM_024211]	67863	NM_024211	ENSMUST00000134804///ENSMUST00000014750
A_51_P433556,A_55_P2739370,A_55_P2734742|70044	3.25235e-16	1.01785e-17	2.42583	1.5922	-1.52357	2.37403	1.75348	-1.3539	Tut1	terminal uridylyl transferase 1, U6 snRNA-specific	Mus musculus terminal uridylyl transferase 1, U6 snRNA-specific (Tut1), mRNA [NM_197993]///Q8R3F9_MOUSE (Q8R3F9) RNA binding motif protein 21, partial (17%) [TC1637762]	70044	NM_197993	ENSMUST00000096239
A_55_P2069052,A_55_P2646618,A_55_P2857362|50720	3.28165e-16	1.02833e-17	2.10688	-1.07232	-2.25924	2.16539	-1.0525	-2.27907	Sacs	sacsin	sacsin [Source:MGI Symbol;Acc:MGI:1354724] [ENSMUST00000119509]///sacsin [Source:MGI Symbol;Acc:MGI:1354724] [ENSMUST00000150222]///sacsin [Source:MGI Symbol;Acc:MGI:1354724] [ENSMUST00000119943]	50720	XM_006519226	ENSMUST00000119509///ENSMUST00000150222///ENSMUST00000119943
A_52_P257041,A_55_P1999324,A_55_P2741356|229228	3.30746e-16	1.03773e-17	-2.05927	-1.16292	1.77078	-2.00487	-1.2889	1.55549	Nudt6	nudix (nucleoside diphosphate linked moiety X)-type motif 6	Mus musculus nudix (nucleoside diphosphate linked moiety X)-type motif 6 (Nudt6), transcript variant 2, mRNA [NM_153561]///Mus musculus nudix (nucleoside diphosphate linked moiety X)-type motif 6 (Nudt6), transcript variant 1, mRNA [NM_001291044]	229228	NM_153561///NM_001291044	ENSMUST00000198158///ENSMUST00000052645///ENSMUST00000133894
A_52_P238159|327988	3.3132e-16	1.04084e-17	-6.82859	-3.16418	2.15809	-6.47661	-3.52917	1.83516	Gm9975	predicted gene 9975	PREDICTED: Mus musculus predicted gene 9975 (Gm9975), misc_RNA [XR_168614]	327988
A_52_P489119|230082	3.33509e-16	1.04905e-17	2.55826	-1.05387	-2.69608	2.32502	1.13965	-2.04013	Nol6	nucleolar protein family 6 (RNA-associated)	Mus musculus nucleolar protein family 6 (RNA-associated) (Nol6), mRNA [NM_139236]	230082	NM_139236	ENSMUST00000030138
A_55_P2723752|384864	3.37027e-16	1.06145e-17	1.83056	-1.13391	-2.07568	1.93608	-1.04461	-2.02244	Gm1943	WD repeat domain 70 pseudogene	Mus musculus predicted gene 1943 (Gm1943), non-coding RNA [NR_002928]	384864	NR_002928
A_55_P2010962,A_52_P283119,A_55_P2917745|20935	3.37177e-16	1.06326e-17	2.71096	1.16065	-2.33572	2.49531	1.30435	-1.91308	Surf6	surfeit gene 6	Mus musculus surfeit gene 6 (Surf6), mRNA [NM_009298]	20935	NM_009298	ENSMUST00000114043///ENSMUST00000129554
A_55_P1982986,A_52_P198727|67884	3.37249e-16	1.06483e-17	-1.94174	1.07032	2.07828	-1.99676	1.18772	2.3716	1810043G02Rik	RIKEN cDNA 1810043G02 gene	Mus musculus RIKEN cDNA 1810043G02 gene (1810043G02Rik), mRNA [NM_026431]	67884	NM_026431	ENSMUST00000116237///ENSMUST00000149074
A_65_P16841,A_55_P1982454,A_55_P2929227|13860	3.38951e-16	1.07155e-17	3.01201	1.55383	-1.93844	3.28824	1.42817	-2.30242	Eps8	epidermal growth factor receptor pathway substrate 8	Mus musculus epidermal growth factor receptor pathway substrate 8 (Eps8), transcript variant 1, mRNA [NM_007945]///epidermal growth factor receptor pathway substrate 8 [Source:MGI Symbol;Acc:MGI:104684] [ENSMUST00000139753]	13860	NM_007945	ENSMUST00000146442///ENSMUST00000100841///ENSMUST00000139753
A_51_P278887,A_66_P133405|68917	3.39244e-16	1.07382e-17	-1.92391	-1.31384	1.46434	-1.80944	-1.23452	1.46569	Hint2	histidine triad nucleotide binding protein 2	Mus musculus histidine triad nucleotide binding protein 2 (Hint2), mRNA [NM_026871]	68917	NM_026871	ENSMUST00000030192///ENSMUST00000151514
A_55_P2114908|23954	3.39444e-16	1.0758e-17	-2.53955	-1.43791	1.76614	-2.60412	-1.36742	1.9044	Nek3	NIMA (never in mitosis gene a)-related expressed kinase 3	Mus musculus NIMA (never in mitosis gene a)-related expressed kinase 3 (Nek3), transcript variant 1, mRNA [NM_001162947]	23954	NM_001162947	ENSMUST00000110730
A_52_P140005,A_55_P2743710|70701	3.40433e-16	1.08029e-17	58.648	1.46846	-39.9385	46.0701	1.29101	-35.6853	Nipal1	NIPA-like domain containing 1	Mus musculus NIPA-like domain containing 1 (Nipal1), mRNA [NM_001081205]	70701	NM_001081205	ENSMUST00000087212///ENSMUST00000197772
A_55_P2739022,A_55_P2096043|329910	3.40565e-16	1.08206e-17	-2.37365	1.26921	3.01267	-3.04978	1.10138	3.35897	Acot11	acyl-CoA thioesterase 11	Mus musculus acyl-CoA thioesterase 11 (Acot11), transcript variant 2, mRNA [NM_025590]	329910	NM_025590	ENSMUST00000140541///ENSMUST00000102762
A_55_P2104975,A_55_P2142226|238393	3.4596e-16	1.10058e-17	-3.09642	-1.99517	1.55196	-3.09419	-2.26114	1.36842	Serpina3f	serine (or cysteine) peptidase inhibitor, clade A, member 3F	Mus musculus serine (or cysteine) peptidase inhibitor, clade A, member 3F (Serpina3f), transcript variant 1, mRNA [NM_001168294]	238393	NM_001168294	ENSMUST00000121337///ENSMUST00000167049
A_30_P01031134	3.53407e-16	1.12567e-17	-2.11977	1.12137	2.37704	-2.14663	1.05471	2.26407			lincRNA:chr14:21461716-21462270 forward strand
A_51_P132718|78329	3.556e-16	1.13407e-17	-2.9861	-1.50499	1.98413	-3.05379	-1.63684	1.86565	2310010J17Rik	RIKEN cDNA 2310010J17 gene	Mus musculus RIKEN cDNA 2310010J17 gene (2310010J17Rik), transcript variant 1, long non-coding RNA [NR_046006]	78329	NR_046006
A_51_P406008|59053	3.57701e-16	1.14347e-17	2.78007	1.09247	-2.54476	2.69941	1.23487	-2.18599	Hgh1	HGH1 homolog	Mus musculus HGH1 homolog (Hgh1), mRNA [NM_021555]	59053	NM_021555	ENSMUST00000023213
A_51_P347728,A_52_P368629,A_55_P2496471|56748	3.57701e-16	1.14361e-17	-1.97315	-1.19709	1.64828	-2.02621	-1.2142	1.66877	Nfu1	NFU1 iron-sulfur cluster scaffold	Mus musculus NFU1 iron-sulfur cluster scaffold (Nfu1), transcript variant 2, mRNA [NM_020045]///NFU1 iron-sulfur cluster scaffold [Source:MGI Symbol;Acc:MGI:1913290] [ENSMUST00000205018]///Mus musculus NFU1 iron-sulfur cluster scaffold (Nfu1), transcript variant 1, mRNA [NM_001170591]	56748	NM_020045///NM_001170591	ENSMUST00000144776///ENSMUST00000205018///ENSMUST00000032060
A_52_P284652,A_52_P418602|71446	3.5778e-16	1.1467e-17	1.9876	1.1316	-1.75645	1.84728	1.29914	-1.42192	Wrb	tryptophan rich basic protein	tryptophan rich basic protein [Source:MGI Symbol;Acc:MGI:2136882] [ENSMUST00000140476]///Mus musculus tryptophan rich basic protein (Wrb), mRNA [NM_207301]	71446	NM_207301	ENSMUST00000140476///ENSMUST00000023913
A_55_P2007510|67898	3.5778e-16	1.14646e-17	-2.03827	-1.38918	1.46725	-2.07665	-1.23561	1.68067	Pef1	penta-EF hand domain containing 1	Mus musculus penta-EF hand domain containing 1 (Pef1), mRNA [NM_026441]	67898	NM_026441	ENSMUST00000030563
A_51_P192130|20868	3.60311e-16	1.15625e-17	2.55154	1.33496	-1.91133	2.56204	1.29621	-1.97656	Stk10	serine/threonine kinase 10	Mus musculus serine/threonine kinase 10 (Stk10), mRNA [NM_009288]	20868	NM_009288	ENSMUST00000102821
A_66_P106702,A_52_P163939|76524	3.66991e-16	1.17914e-17	-3.1893	-1.09782	2.90511	-2.93992	-1.09647	2.68125	Cln6	ceroid-lipofuscinosis, neuronal 6	Mus musculus ceroid-lipofuscinosis, neuronal 6 (Cln6), mRNA [NM_001033175]	76524	NM_001033175	ENSMUST00000124984///ENSMUST00000034776
A_66_P130139,A_55_P2809600|67579	3.70112e-16	1.19064e-17	2.94739	-1.018	-3.00045	3.1046	-1.1928	-3.70315	Cpeb4	cytoplasmic polyadenylation element binding protein 4	Mus musculus cytoplasmic polyadenylation element binding protein 4 (Cpeb4), transcript variant 3, mRNA [NM_001290678]///Mus musculus cytoplasmic polyadenylation element binding protein 4 (Cpeb4), transcript variant 1, mRNA [NM_026252]	67579	NM_001290678///NM_026252	ENSMUST00000020543///ENSMUST00000109412
A_51_P493105|76894	3.72175e-16	1.19875e-17	-2.33224	-1.26213	1.84785	-2.37224	-1.36829	1.73373	Mettl15	methyltransferase like 15	Mus musculus methyltransferase like 15 (Mettl15), mRNA [NM_029790]	76894	NM_029790	ENSMUST00000147376
A_52_P608322|17133	3.75371e-16	1.21054e-17	2.01947	-1.32294	-2.67163	2.04787	-1.36554	-2.79645	Maff	v-maf musculoaponeurotic fibrosarcoma oncogene family, protein F (avian)	Mus musculus v-maf musculoaponeurotic fibrosarcoma oncogene family, protein F (avian) (Maff), transcript variant 1, mRNA [NM_010755]	17133	NM_010755	ENSMUST00000096350
A_55_P2152364|100038355	3.77421e-16	1.21865e-17	2.57535	1.02381	-2.51546	2.74417	1.17256	-2.34034	Runx2os1	runt related transcription factor 2, opposite strand 1		100038355
A_51_P109508|171285	3.79763e-16	1.22772e-17	44.8142	1.80407	-24.8406	31.6086	1.77904	-17.7672	Havcr2	hepatitis A virus cellular receptor 2	Mus musculus hepatitis A virus cellular receptor 2 (Havcr2), mRNA [NM_134250]	171285	NM_134250	ENSMUST00000109229
A_55_P2760958,A_55_P2730821,A_66_P139382,A_52_P651998|17330	3.81146e-16	1.2337e-17	1.78987	1.23789	-1.4459	1.77636	1.19229	-1.48987	Minpp1	multiple inositol polyphosphate histidine phosphatase 1	Mus musculus multiple inositol polyphosphate histidine phosphatase 1 (Minpp1), mRNA [NM_010799]///Q8C9C2_MOUSE (Q8C9C2) 3 days neonate thymus cDNA, RIKEN full-length enriched library, clone:A630093A20 product:multiple inositol polyphosphate histidine phosphatase 1, full insert sequence. (Fragment), partial (74%) [TC1720885]///BB249327 RIKEN full-length enriched, 7 days neonate cerebellum Mus musc…	17330	NM_010799	ENSMUST00000025827///ENSMUST00000117562
A_55_P2072284|436022	3.82898e-16	1.24089e-17	-5.60698	-1.51549	3.69977	-4.89804	-1.74583	2.80556	Dnaaf3	dynein, axonemal assembly factor 3	Mus musculus dynein, axonemal assembly factor 3 (Dnaaf3), mRNA [NM_001033548]	436022	NM_001033548	ENSMUST00000094897
A_30_P01033549	3.83876e-16	1.24559e-17	3.87729	-1.01465	-3.93408	3.74826	-1.12213	-4.20604			lincRNA:chr14:56348028-56348470 reverse strand
A_55_P2726272	3.88756e-16	1.26297e-17	3.94353	2.01271	-1.95931	4.15747	2.0322	-2.0458			PREDICTED: Mus musculus uncharacterized LOC100504746, transcript variant 1 (LOC100504746), misc_RNA [XR_108246]
A_66_P106654,A_55_P2605756,A_66_P137221|227634	3.91013e-16	1.27185e-17	2.18294	1.15156	-1.89564	2.01334	1.12377	-1.79159	Camsap1	calmodulin regulated spectrin-associated protein 1	Mus musculus calmodulin regulated spectrin-associated protein 1 (Camsap1), transcript variant 3, mRNA [NM_001276361]///Mus musculus calmodulin regulated spectrin-associated protein 1 (Camsap1), transcript variant 1, mRNA [NM_001276359]	227634	NM_001276361///NM_001276359	ENSMUST00000143977///ENSMUST00000139937///ENSMUST00000134970
A_51_P173212,A_55_P2720263|228983	3.91976e-16	1.27663e-17	-1.75765	1.01223	1.77915	-2.04003	-1.07971	1.88941	Osbpl2	oxysterol binding protein-like 2	Mus musculus oxysterol binding protein-like 2 (Osbpl2), mRNA [NM_144500]///oxysterol binding protein-like 2 [Source:MGI Symbol;Acc:MGI:2442832] [ENSMUST00000124225]	228983	NM_144500	ENSMUST00000040668///ENSMUST00000124225
A_55_P2064074|194309	3.91976e-16	1.2781e-17	-2.50198	-1.28539	1.94647	-2.60699	-1.12974	2.3076	Vps37d	vacuolar protein sorting 37D	Mus musculus vacuolar protein sorting 37D (Vps37d), transcript variant 1, mRNA [NM_001199677]	194309	NM_001199677	ENSMUST00000067935
A_55_P2483521,A_55_P2006554,A_52_P426072|26987	3.92192e-16	1.28036e-17	1.54557	-1.01549	-1.56951	1.58383	1.06387	-1.48875	Eif4e2	eukaryotic translation initiation factor 4E member 2	Mus musculus eukaryotic translation initiation factor 4E member 2 (Eif4e2), transcript variant 4, mRNA [NM_001347083]///Mus musculus eukaryotic translation initiation factor 4E member 2 (Eif4e2), transcript variant 2, mRNA [NM_001039169]///eukaryotic translation initiation factor 4E member 2 [Source:MGI Symbol;Acc:MGI:1914440] [ENSMUST00000050876]	26987	NM_001347083///NM_001039169///XM_006529670	ENSMUST00000113235///ENSMUST00000076362///ENSMUST00000050876
A_55_P1993984,A_55_P2064240|69536	3.92876e-16	1.28415e-17	-1.90929	-1.07928	1.76904	-1.76366	-1.05286	1.67511	Hemk1	HemK methyltransferase family member 1	Mus musculus HemK methyltransferase family member 1 (Hemk1), mRNA [NM_133984]	69536	NM_133984	ENSMUST00000148165///ENSMUST00000118051
A_51_P301994|52575	3.96003e-16	1.29595e-17	2.81296	1.44998	-1.94	3.04203	1.46828	-2.07183	Trmt10c	tRNA methyltransferase 10C	Mus musculus tRNA methyltransferase 10C (Trmt10c), mRNA [NM_029092]	52575	NM_029092	ENSMUST00000059052
A_51_P299216|106618	3.97939e-16	1.30438e-17	-2.98129	1.07069	3.19202	-3.00485	-1.03291	2.9091	Wdr90	WD repeat domain 90	Mus musculus WD repeat domain 90 (Wdr90), mRNA [NM_001163766]	106618	NM_001163766	ENSMUST00000176575
A_51_P264527|56279	3.97939e-16	1.30544e-17	-2.3235	-1.1243	2.06663	-2.87608	-1.26204	2.27891	Fam69b	family with sequence similarity 69, member B	Mus musculus family with sequence similarity 69, member B (Fam69b), mRNA [NM_019833]	56279	NM_019833	ENSMUST00000074240
A_51_P380432|20289	4.0073e-16	1.31619e-17	-3.72947	-1.48114	2.51797	-3.60147	-1.52881	2.35573	Scx	scleraxis	Mus musculus scleraxis (Scx), mRNA [NM_198885]	20289	NM_198885	ENSMUST00000043089
A_55_P1985433,A_52_P369769,A_55_P2874801,A_55_P2811400,A_52_P158772|211323	4.01074e-16	1.31891e-17	1.59305	-1.14449	-1.82323	1.8485	-1.11274	-2.05691	Nrg1	neuregulin 1	Mus musculus neuregulin 1 (Nrg1), mRNA [NM_178591]///neuregulin 1 [Source:MGI Symbol;Acc:MGI:96083] [ENSMUST00000209022]///PREDICTED: Mus musculus neuregulin 1 (Nrg1), transcript variant X10, mRNA [XM_006509068]///neuregulin 1 [Source:MGI Symbol;Acc:MGI:96083] [ENSMUST00000207470]	211323	NM_178591///XM_006509068///XM_006509076	ENSMUST00000208819///ENSMUST00000209022///ENSMUST00000207470
A_51_P456857|81896	4.04707e-16	1.33247e-17	-2.4901	-1.04694	2.37845	-2.58835	-1.19003	2.17504	Ift122	intraflagellar transport 122	Mus musculus intraflagellar transport 122 (Ift122), transcript variant 1, mRNA [NM_031177]	81896	NM_031177	ENSMUST00000038234
A_55_P2048011,A_52_P513167,A_65_P08741|217980	4.09233e-16	1.35062e-17	1.77293	1.26295	-1.4038	1.85468	1.2683	-1.46234	Larp4b	La ribonucleoprotein domain family, member 4B	Mus musculus La ribonucleoprotein domain family, member 4B (Larp4b), transcript variant 1, mRNA [NM_172585]	217980	NM_172585	ENSMUST00000189330///ENSMUST00000188939///ENSMUST00000188211
A_55_P2846241,A_55_P2814143|212547	4.09233e-16	1.34992e-17	2.84855	1.18119	-2.4116	2.74216	1.20328	-2.2789	Nepro	nucleolus and neural progenitor protein	Mus musculus nucleolus and neural progenitor protein (Nepro), mRNA [NM_145972]	212547	NM_145972	ENSMUST00000048788///ENSMUST00000147804
A_52_P493810|20815	4.12646e-16	1.36352e-17	1.83668	1.23354	-1.48895	1.92924	1.30857	-1.47431	Srpk1	serine/arginine-rich protein specific kinase 1	Mus musculus serine/arginine-rich protein specific kinase 1 (Srpk1), mRNA [NM_016795]	20815	NM_016795	ENSMUST00000004987
A_55_P2738017,A_51_P422208,A_55_P2482993|13478	4.14554e-16	1.37147e-17	-1.42697	-1.06284	1.34261	-1.50385	1.00552	1.51216	Dpagt1	dolichyl-phosphate (UDP-N-acetylglucosamine) acetylglucosaminephosphotransferase 1 (GlcNAc-1-P transferase)	dolichyl-phosphate (UDP-N-acetylglucosamine) acetylglucosaminephosphotransferase 1 (GlcNAc-1-P transferase) [Source:MGI Symbol;Acc:MGI:1196396] [ENSMUST00000216327]///Mus musculus dolichyl-phosphate (UDP-N-acetylglucosamine) acetylglucosaminephosphotransferase 1 (GlcNAc-1-P transferase) (Dpagt1), mRNA [NM_007875]	13478	NM_007875	ENSMUST00000216327///ENSMUST00000215050
A_55_P2014645,A_51_P301215|66356	4.15091e-16	1.3749e-17	2.07989	1.26634	-1.64244	2.05437	1.36724	-1.50257	Knop1	lysine rich nucleolar protein 1	Mus musculus lysine rich nucleolar protein 1 (Knop1), transcript variant 1, mRNA [NM_023197]	66356	NM_023197	ENSMUST00000033277///ENSMUST00000106550
A_55_P2142393,A_55_P2506865,A_55_P2732041|12286	4.1732e-16	1.38394e-17	-2.23944	1.3842	3.09982	-2.11317	1.47125	3.109	Cacna1a	calcium channel, voltage-dependent, P/Q type, alpha 1A subunit	Mus musculus calcium channel, voltage-dependent, P/Q type, alpha 1A subunit (Cacna1a), transcript variant 1, mRNA [NM_007578]///Mus musculus calcium channel, voltage-dependent, P/Q type, alpha 1A subunit (Cacna1a), transcript variant 3, mRNA [NM_001252060]	12286	NM_007578///NM_001252060	ENSMUST00000121390///ENSMUST00000135382
A_55_P2729165,A_55_P1996946|107995	4.23188e-16	1.40508e-17	-1.69323	-1.28583	1.31684	-1.78724	-1.26927	1.40809	Cdc20	cell division cycle 20	Mus musculus cell division cycle 20 (Cdc20), mRNA [NM_023223]	107995	NM_023223	ENSMUST00000151302///ENSMUST00000006565
A_52_P436238,A_55_P1995173|18263	4.23468e-16	1.40769e-17	2.37838	1.02437	-2.3218	2.47539	1.03606	-2.38924	Odc1	ornithine decarboxylase, structural 1	Mus musculus ornithine decarboxylase, structural 1 (Odc1), mRNA [NM_013614]	18263	NM_013614	ENSMUST00000220849///ENSMUST00000171737
A_55_P2137521,A_51_P480233|67824	4.3161e-16	1.4399e-17	-1.78578	-1.04327	1.71171	-1.80351	-1.05557	1.70855	Nmral1	NmrA-like family domain containing 1	Mus musculus NmrA-like family domain containing 1 (Nmral1), transcript variant 4, mRNA [NM_001290763]///Mus musculus NmrA-like family domain containing 1 (Nmral1), transcript variant 1, mRNA [NM_026393]	67824	NM_001290763///NM_026393	ENSMUST00000079130
A_52_P498355|380840	4.3161e-16	1.4396e-17	-1.8409	-1.26714	1.4528	-1.94486	-1.263	1.53987	Lyrm4	LYR motif containing 4	Mus musculus LYR motif containing 4 (Lyrm4), mRNA [NM_201358]	380840	NM_201358	ENSMUST00000053265
A_51_P175581,A_55_P2072000|319263	4.3161e-16	1.43895e-17	-3.39987	-1.04045	3.26769	-3.35215	-1.25801	2.66464	Pcmtd1	protein-L-isoaspartate (D-aspartate) O-methyltransferase domain containing 1	Mus musculus protein-L-isoaspartate (D-aspartate) O-methyltransferase domain containing 1 (Pcmtd1), mRNA [NM_183028]	319263	NM_183028	ENSMUST00000182823///ENSMUST00000061280
A_55_P2736255|59007	4.40064e-16	1.46985e-17	-2.78073	-1.31775	2.1102	-3.13638	-1.52074	2.0624	Ngly1	N-glycanase 1	Mus musculus N-glycanase 1 (Ngly1), mRNA [NM_021504]	59007	NM_021504	ENSMUST00000022310
A_51_P477941|30838	4.42583e-16	1.48002e-17	-2.88071	-1.57532	1.82865	-2.78869	-1.7182	1.62303	Fbxw4	F-box and WD-40 domain protein 4	Mus musculus F-box and WD-40 domain protein 4 (Fbxw4), mRNA [NM_013907]	30838	NM_013907	ENSMUST00000046869
A_52_P349912,A_55_P1997225|216439	4.5143e-16	1.5114e-17	-5.82554	-1.46918	3.96518	-5.86452	-1.60293	3.65864	Agap2	ArfGAP with GTPase domain, ankyrin repeat and PH domain 2	Mus musculus ArfGAP with GTPase domain, ankyrin repeat and PH domain 2 (Agap2), transcript variant 1, mRNA [NM_001033263]	216439	NM_001033263	ENSMUST00000217941///ENSMUST00000039259
A_55_P2013336|17279	4.54086e-16	1.5221e-17	-2.66672	-1.13263	2.35446	-2.75279	-1.18942	2.3144	Melk	maternal embryonic leucine zipper kinase	Mus musculus maternal embryonic leucine zipper kinase (Melk), mRNA [NM_010790]	17279	NM_010790	ENSMUST00000045607
A_55_P2935845,A_51_P117109,A_55_P2734672|216136	4.55423e-16	1.52839e-17	-1.98573	-1.22981	1.61466	-1.95912	-1.33287	1.46986	Ilvbl	ilvB (bacterial acetolactate synthase)-like	Mus musculus ilvB (bacterial acetolactate synthase)-like (Ilvbl), mRNA [NM_173751]///ilvB (bacterial acetolactate synthase)-like [Source:MGI Symbol;Acc:MGI:1351911] [ENSMUST00000220430]	216136	NM_173751	ENSMUST00000218215///ENSMUST00000218885///ENSMUST00000220430
A_55_P2049473,A_55_P2802246,A_55_P2049479|24056	4.59899e-16	1.54671e-17	-1.56821	-1.00224	1.56471	-1.76053	-1.04979	1.67704	Sh3bp5	SH3-domain binding protein 5 (BTK-associated)	Mus musculus SH3-domain binding protein 5 (BTK-associated) (Sh3bp5), transcript variant 1, mRNA [NM_011894]	24056	NM_011894	ENSMUST00000140002///ENSMUST00000091903///ENSMUST00000100730
A_52_P916995	4.59899e-16	1.54706e-17	-7.22259	-1.64185	4.39905	-6.35769	-1.41127	4.50494			UI-M-BH3-aus-e-10-0-UI.s1 NIH_BMAP_M_S4 Mus musculus cDNA clone UI-M-BH3-aus-e-10-0-UI 3'. [AW495281]
A_55_P2061278|17691	4.61853e-16	1.55547e-17	-4.18975	-2.34593	1.78597	-4.90753	-2.75412	1.78189	Sik1	salt inducible kinase 1	Mus musculus salt inducible kinase 1 (Sik1), mRNA [NM_010831]	17691	NM_010831	ENSMUST00000024839
A_55_P2098226|232371	4.67035e-16	1.57477e-17	-4.82552	-1.10255	4.37669	-4.59874	-1.45925	3.15144	C1rl	complement component 1, r subcomponent-like	Mus musculus complement component 1, r subcomponent-like (C1rl), mRNA [NM_181344]	232371	NM_181344	ENSMUST00000049124
A_55_P2799088,A_52_P359621,A_55_P2132345,A_55_P2504310|269593	4.76694e-16	1.60924e-17	1.6633	1.14022	-1.45876	1.66129	1.1334	-1.46576	Luzp1	leucine zipper protein 1	Mus musculus leucine zipper protein 1 (Luzp1), mRNA [NM_024452]	269593	NM_024452	ENSMUST00000063021///ENSMUST00000170102
A_55_P2720590,A_51_P486618,A_52_P257058|67861	4.78876e-16	1.6185e-17	-1.88068	-1.08675	1.73055	-1.89499	-1.19574	1.58478	Akr1b10	aldo-keto reductase family 1, member B10 (aldose reductase)	aldo-keto reductase family 1, member B10 (aldose reductase) [Source:MGI Symbol;Acc:MGI:1915111] [ENSMUST00000182055]///Mus musculus aldo-keto reductase family 1, member B10 (aldose reductase) (Akr1b10), mRNA [NM_172398]///aldo-keto reductase family 1, member B10 (aldose reductase) [Source:MGI Symbol;Acc:MGI:1915111] [ENSMUST00000144384]	67861	NM_172398	ENSMUST00000182055///ENSMUST00000139156///ENSMUST00000144384
A_52_P371949,A_52_P85864,A_55_P1989013|16418	4.84569e-16	1.64041e-17	1.84462	-1.0819	-1.9957	1.93839	1.12913	-1.71671	Eif6	eukaryotic translation initiation factor 6	eukaryotic translation initiation factor 6 [Source:MGI Symbol;Acc:MGI:1196288] [ENSMUST00000109638]///Mus musculus eukaryotic translation initiation factor 6 (Eif6), mRNA [NM_010579]	16418	NM_010579	ENSMUST00000109638///ENSMUST00000134811///ENSMUST00000138962
A_55_P2508748|100503595	4.84569e-16	1.64159e-17	-2.39833	1.12549	2.6993	-2.9192	1.06373	3.10524	Gm13003	predicted gene 13003	Mus musculus predicted gene 13003 (Gm13003), long non-coding RNA [NR_040443]	100503595	NR_040443
A_52_P604398,A_52_P88808,A_55_P2743455|52348	4.87936e-16	1.65494e-17	1.96708	1.32431	-1.48536	2.05865	1.25572	-1.63942	Vps37a	vacuolar protein sorting 37A	Mus musculus vacuolar protein sorting 37A (Vps37a), mRNA [NM_033560]	52348	NM_033560	ENSMUST00000098817
A_52_P14810,A_55_P2061386|216848	4.90332e-16	1.66501e-17	-2.00465	-1.05721	1.89618	-2.01893	-1.06319	1.89894	Chd3	chromodomain helicase DNA binding protein 3	Mus musculus chromodomain helicase DNA binding protein 3 (Chd3), mRNA [NM_146019]	216848	NM_146019	ENSMUST00000128981///ENSMUST00000108661
A_51_P418935|415115	4.96054e-16	1.68641e-17	-2.22844	-1.00234	2.22323	-2.25322	-1.00572	2.24041	Neurl2	neuralized E3 ubiquitin protein ligase 2	Mus musculus neuralized E3 ubiquitin protein ligase 2 (Neurl2), mRNA [NM_001082974]	415115	NM_001082974	ENSMUST00000042775
A_55_P2870994|19718	4.9766e-16	1.69583e-17	-2.26822	-1.1305	2.00639	-2.2087	1.04274	2.30309	Rfc2	replication factor C (activator 1) 2	Mus musculus replication factor C (activator 1) 2 (Rfc2), mRNA [NM_020022]	19718	NM_020022	ENSMUST00000201464
A_55_P2714091,A_51_P359636|19039	4.9766e-16	1.69468e-17	-2.01481	-1.2239	1.64622	-1.91378	-1.22693	1.55981	Lgals3bp	lectin, galactoside-binding, soluble, 3 binding protein	lectin, galactoside-binding, soluble, 3 binding protein [Source:MGI Symbol;Acc:MGI:99554] [ENSMUST00000127054]///Mus musculus lectin, galactoside-binding, soluble, 3 binding protein (Lgals3bp), mRNA [NM_011150]	19039	NM_011150	ENSMUST00000127054///ENSMUST00000043722
A_51_P340699|68895	5.0237e-16	1.71387e-17	-5.23402	-1.20466	4.3448	-5.71811	-1.61115	3.54907	Rasl11a	RAS-like, family 11, member A	Mus musculus RAS-like, family 11, member A (Rasl11a), mRNA [NM_026864]	68895	NM_026864	ENSMUST00000198570
A_51_P502993|70615	5.06581e-16	1.73025e-17	-1.62489	1.04248	1.69392	-1.69589	1.05412	1.78768	Ankrd24	ankyrin repeat domain 24	Mus musculus ankyrin repeat domain 24 (Ankrd24), mRNA [NM_027480]	70615	NM_027480	ENSMUST00000154707
A_55_P2015842,A_51_P150195,A_65_P11410|74302	5.1957e-16	1.77668e-17	-2.19845	-1.11848	1.96557	-2.19468	-1.13222	1.9384	Mtmr3	myotubularin related protein 3	Mus musculus myotubularin related protein 3 (Mtmr3), mRNA [NM_028860]	74302	NM_028860	ENSMUST00000202103///ENSMUST00000130716
A_51_P270666|231915	5.19654e-16	1.77903e-17	1.92439	1.06577	-1.80565	1.81672	1.18987	-1.52682	Uspl1	ubiquitin specific peptidase like 1	Mus musculus ubiquitin specific peptidase like 1 (Uspl1), transcript variant 4, mRNA [NM_001013378]	231915	NM_001013378	ENSMUST00000121416
A_55_P2021049|216558	5.23543e-16	1.79442e-17	-1.90847	-1.52729	1.24958	-1.85868	-1.65559	1.12266	Ugp2	UDP-glucose pyrophosphorylase 2	Mus musculus UDP-glucose pyrophosphorylase 2 (Ugp2), transcript variant 1, mRNA [NM_139297]	216558	NM_139297	ENSMUST00000102875
A_55_P2003236|100042416	5.23659e-16	1.7969e-17	-8.26766	-5.18106	1.59575	-8.20228	-4.87831	1.68138	D830025C05Rik	RIKEN cDNA D830025C05 gene	Q8VIY9_MYCTU (Q8VIY9) PE_PGRS family protein, partial (3%) [TC1600058]	100042416
A_51_P308254,A_55_P2740538|20931	5.27432e-16	1.81194e-17	2.44424	1.21454	-2.01248	2.3722	1.39671	-1.69842	Surf2	surfeit gene 2	Mus musculus surfeit gene 2 (Surf2), mRNA [NM_013678]	20931	NM_013678	ENSMUST00000125408
A_55_P2033250,A_66_P111208|14137	5.2992e-16	1.82259e-17	-1.32146	-1.7776	-1.34518	-1.36693	-2.01252	-1.47229	Fdft1	farnesyl diphosphate farnesyl transferase 1	Mus musculus farnesyl diphosphate farnesyl transferase 1 (Fdft1), mRNA [NM_010191]	14137	NM_010191	ENSMUST00000038304///ENSMUST00000054963
A_55_P2736625,A_55_P2888540|319822	5.31287e-16	1.82941e-17	-1.95687	1.03463	2.02464	-2.24186	-1.06518	2.10467	Smyd4	SET and MYND domain containing 4	Mus musculus SET and MYND domain containing 4 (Smyd4), mRNA [NM_001102611]	319822	NM_001102611	ENSMUST00000044530///ENSMUST00000145888
A_52_P217172,A_51_P446192|66580	5.33631e-16	1.8396e-17	1.73921	-1.13184	-1.96851	1.84395	-1.14952	-2.11966	Esf1	ESF1 nucleolar pre-rRNA processing protein homolog	Mus musculus ESF1 nucleolar pre-rRNA processing protein homolog (Esf1), mRNA [NM_001081090]	66580	NM_001081090	ENSMUST00000151317///ENSMUST00000153769
A_52_P491073|140859	5.37447e-16	1.85488e-17	-2.37541	-1.0696	2.22084	-2.34708	-1.01896	2.3034	Nek8	NIMA (never in mitosis gene a)-related expressed kinase 8	Mus musculus NIMA (never in mitosis gene a)-related expressed kinase 8 (Nek8), mRNA [NM_080849]	140859	NM_080849	ENSMUST00000131015
A_51_P164203,A_52_P67088|56520	5.38744e-16	1.8615e-17	-2.00974	1.0009	2.01155	-1.84697	1.04984	1.93902	Nme4	NME/NM23 nucleoside diphosphate kinase 4	Mus musculus NME/NM23 nucleoside diphosphate kinase 4 (Nme4), mRNA [NM_019731]	56520	NM_019731	ENSMUST00000025007///ENSMUST00000150280
A_51_P402686,A_55_P2024948|15416	5.42779e-16	1.8776e-17	-2.40988	1.34403	3.23894	-2.71482	1.33943	3.63632	Hoxb8	homeobox B8	Mus musculus homeobox B8 (Hoxb8), mRNA [NM_010461]	15416	NM_010461	ENSMUST00000052650
A_52_P588997,A_55_P2105457,A_51_P240594|223669	5.44783e-16	1.88669e-17	2.26585	1.32101	-1.71524	2.1872	1.34261	-1.62907	Zfp7	zinc finger protein 7	Mus musculus zinc finger protein 7 (Zfp7), mRNA [NM_145916]	223669	NM_145916	ENSMUST00000023179
A_66_P125560|404634	5.46875e-16	1.89611e-17	-1.83618	-1.11186	1.65144	-1.74765	-1.05542	1.65589	H2afy2	H2A histone family, member Y2	Mus musculus H2A histone family, member Y2 (H2afy2), mRNA [NM_207000]	404634	NM_207000	ENSMUST00000020283
A_66_P100365	5.56431e-16	1.93146e-17	3.028	1.01259	-2.99036	3.33604	1.12517	-2.96493			predicted gene 9523 [Source:MGI Symbol;Acc:MGI:3779932] [ENSMUST00000199146]			ENSMUST00000199146
A_51_P112445,A_55_P2594262|269470	5.56888e-16	1.93525e-17	2.6846	1.27446	-2.10645	2.82583	1.49715	-1.88747	Wdr3	WD repeat domain 3	Mus musculus WD repeat domain 3 (Wdr3), mRNA [NM_175552]	269470	NM_175552	ENSMUST00000052120///ENSMUST00000125059
A_52_P180565,A_66_P114337|69662	5.58231e-16	1.94214e-17	1.8874	1.59293	-1.18487	1.80891	1.74727	-1.03528	2310061I04Rik	RIKEN cDNA 2310061I04 gene	Mus musculus RIKEN cDNA 2310061I04 gene (2310061I04Rik), mRNA [NM_001033630]	69662	NM_001033630	ENSMUST00000059740///ENSMUST00000146451
A_51_P465512,A_55_P2713316|18108	5.61255e-16	1.95489e-17	1.87125	1.72822	-1.08276	1.80229	1.67785	-1.07417	Nmt2	N-myristoyltransferase 2	Mus musculus N-myristoyltransferase 2 (Nmt2), transcript variant 1, mRNA [NM_008708]///N-myristoyltransferase 2 [Source:MGI Symbol;Acc:MGI:1202298] [ENSMUST00000155761]	18108	NM_008708	ENSMUST00000091504///ENSMUST00000155761
A_30_P01031506	5.63897e-16	1.96633e-17	-3.91817	-1.00146	3.91247	-4.74996	-1.02747	4.62297			lincRNA:chr6:108162092-108162886 reverse strand
A_66_P129428,A_55_P2100209|73804	5.64247e-16	1.97201e-17	-1.91628	-1.09732	1.74632	-2.23407	-1.1473	1.94724	Kif2c	kinesin family member 2C	Mus musculus kinesin family member 2C (Kif2c), transcript variant 1, mRNA [NM_134471]///Mus musculus kinesin family member 2C (Kif2c), transcript variant 2, mRNA [NM_001290662]	73804	NM_134471///NM_001290662	ENSMUST00000142205///ENSMUST00000106436
A_52_P566390,A_52_P430927|211978	5.64247e-16	1.97203e-17	-2.11616	1.19613	2.5312	-2.69271	-1.00757	2.67247	Zfyve26	zinc finger, FYVE domain containing 26	Mus musculus zinc finger, FYVE domain containing 26 (Zfyve26), mRNA [NM_001008550]///zinc finger, FYVE domain containing 26 [Source:MGI Symbol;Acc:MGI:1924767] [ENSMUST00000220003]	211978	NM_001008550	ENSMUST00000218377///ENSMUST00000220003
A_66_P109595,A_55_P2074908,A_52_P614582|63958	5.70089e-16	1.99471e-17	-1.72835	1.04996	1.8147	-1.74269	-1.03167	1.68919	Ube4b	ubiquitination factor E4B	Mus musculus ubiquitination factor E4B (Ube4b), mRNA [NM_022022]	63958	NM_022022	ENSMUST00000103212///ENSMUST00000131986///ENSMUST00000138181
A_51_P413687,A_52_P177341|68033	5.71659e-16	2.00248e-17	-1.75551	-1.54539	1.13596	-1.82702	-1.46671	1.24566	Cox19	cytochrome c oxidase assembly protein 19	cytochrome c oxidase assembly protein 19 [Source:MGI Symbol;Acc:MGI:1915283] [ENSMUST00000049630]///Mus musculus cytochrome c oxidase assembly protein 19 (Cox19), mRNA [NM_197980]	68033	NM_197980	ENSMUST00000049630///ENSMUST00000197520
A_65_P15533,A_55_P1995205,A_66_P120837,A_55_P2713705|21973	5.76892e-16	2.0231e-17	-1.53092	-1.07802	1.42012	-1.6948	-1.10409	1.53501	Top2a	topoisomerase (DNA) II alpha	topoisomerase (DNA) II alpha [Source:MGI Symbol;Acc:MGI:98790] [ENSMUST00000129777]///Mus musculus topoisomerase (DNA) II alpha (Top2a), mRNA [NM_011623]///topoisomerase (DNA) II alpha [Source:MGI Symbol;Acc:MGI:98790] [ENSMUST00000139730]	21973	NM_011623	ENSMUST00000129777///ENSMUST00000154332///ENSMUST00000068031///ENSMUST00000139730
A_52_P636050,A_51_P172752|66614	5.84968e-16	2.05374e-17	2.96566	1.0775	-2.75235	3.08194	1.29446	-2.38087	Gpatch4	G patch domain containing 4	Mus musculus G patch domain containing 4 (Gpatch4), transcript variant 1, mRNA [NM_025663]	66614	NM_025663	ENSMUST00000194380///ENSMUST00000193398
A_52_P400999,A_66_P116235|12549	5.85499e-16	2.05793e-17	2.98622	1.27364	-2.34464	2.41396	1.05976	-2.27783	Arhgap31	Rho GTPase activating protein 31	Mus musculus Rho GTPase activating protein 31 (Arhgap31), mRNA [NM_020260]///Rho GTPase activating protein 31 [Source:MGI Symbol;Acc:MGI:1333857] [ENSMUST00000124866]	12549	NM_020260	ENSMUST00000023487///ENSMUST00000124866
A_55_P1993976,A_52_P240020|231872	5.88892e-16	2.0722e-17	2.02164	1.03655	-1.95036	2.12778	1.21577	-1.75016	Aimp2	aminoacyl tRNA synthetase complex-interacting multifunctional protein 2	Mus musculus aminoacyl tRNA synthetase complex-interacting multifunctional protein 2 (Aimp2), transcript variant 1, mRNA [NM_001172146]///Mus musculus aminoacyl tRNA synthetase complex-interacting multifunctional protein 2 (Aimp2), transcript variant 2, mRNA [NM_146165]	231872	NM_001172146///NM_146165	ENSMUST00000031613///ENSMUST00000149473
A_52_P642167,A_55_P2622435,A_52_P651833,A_55_P2929712,A_55_P2622430|20652	5.89835e-16	2.07786e-17	2.16877	1.14442	-1.89509	2.20509	1.18575	-1.85966	Soat1	sterol O-acyltransferase 1	Mus musculus sterol O-acyltransferase 1 (Soat1), mRNA [NM_009230]///sterol O-acyltransferase 1 [Source:MGI Symbol;Acc:MGI:104665] [ENSMUST00000191379]	20652	NM_009230	ENSMUST00000189661///ENSMUST00000191379///ENSMUST00000187987///ENSMUST00000187073///ENSMUST00000186420
A_51_P315530,A_52_P190647|17121	5.90911e-16	2.08399e-17	-4.03552	-1.21041	3.33402	-4.29187	-1.14437	3.75041	Mxd3	Max dimerization protein 3	Mus musculus Max dimerization protein 3 (Mxd3), mRNA [NM_016662]	17121	NM_016662	ENSMUST00000141644///ENSMUST00000146181
A_52_P564625,A_55_P2486539,A_55_P2112111|22210	5.91006e-16	2.08708e-17	-1.86175	-1.02595	1.81466	-1.86575	-1.14749	1.62595	Ube2b	ubiquitin-conjugating enzyme E2B	UBE2B_HUMAN (P63146) Ubiquitin-conjugating enzyme E2 B (Ubiquitin-protein ligase B) (Ubiquitin carrier protein B) (HR6B) (hHR6B) (E2-17 kDa) , partial (34%) [TC1678883]///Mus musculus ubiquitin-conjugating enzyme E2B (Ube2b), mRNA [NM_009458]	22210	NM_009458	ENSMUST00000020657///ENSMUST00000109086
A_66_P129588,A_52_P106391,A_66_P103477|270156	5.91006e-16	2.08903e-17	1.33776	-1.39091	-1.86071	1.55019	-1.24657	-1.93242	AU019823	expressed sequence AU019823	Mus musculus expressed sequence AU019823 (AU019823), transcript variant 1, mRNA [NM_001134902]///Mus musculus expressed sequence AU019823 (AU019823), transcript variant 2, mRNA [NM_212449]	270156	NM_001134902///NM_212449	ENSMUST00000171462///ENSMUST00000147671
A_51_P208537|77613	5.9594e-16	2.10883e-17	-2.22034	-1.10132	2.01608	-2.21021	-1.1809	1.87164	Prss36	protease, serine 36	Mus musculus protease, serine 36 (Prss36), mRNA [NM_001319147]	77613	NM_001319147	ENSMUST00000094026
A_65_P19660,A_55_P2009973,A_55_P2631624,A_55_P2733632,A_51_P137947,A_65_P00876,A_66_P106065|22129	5.99036e-16	2.12216e-17	-1.70358	-1.03065	1.65292	-1.86202	-1.21173	1.53666	Ttc3	tetratricopeptide repeat domain 3	tetratricopeptide repeat domain 3 [Source:MGI Symbol;Acc:MGI:1276539] [ENSMUST00000139607]///Mus musculus tetratricopeptide repeat domain 3 (Ttc3), mRNA [NM_009441]///tetratricopeptide repeat domain 3 [Source:MGI Symbol;Acc:MGI:1276539] [ENSMUST00000145432]	22129	NM_009441	ENSMUST00000139607///ENSMUST00000117648///ENSMUST00000129536///ENSMUST00000145432///ENSMUST00000131429///ENSMUST00000150346///ENSMUST00000154243
A_55_P2045812,A_51_P300726,A_55_P2734897|18391	6.00193e-16	2.12865e-17	2.08517	1.23705	-1.68559	2.05846	1.40132	-1.46894	Sigmar1	sigma non-opioid intracellular receptor 1	Mus musculus sigma non-opioid intracellular receptor 1 (Sigmar1), transcript variant 1, mRNA [NM_011014]///PREDICTED: Mus musculus sigma non-opioid intracellular receptor 1 (Sigmar1), transcript variant X1, mRNA [XM_017320027]	18391	NM_011014///XM_017320027	ENSMUST00000071561///ENSMUST00000148223
A_52_P68235,A_55_P2740829,A_51_P159503|672511	6.02822e-16	2.14036e-17	-5.43782	-1.75387	3.10048	-5.94367	-2.03382	2.92242	Rnf213	ring finger protein 213	ring finger protein 213 [Source:MGI Symbol;Acc:MGI:1289196] [ENSMUST00000093902]	672511	XM_006534633///XM_006534630	ENSMUST00000093902
A_51_P259214|106957	6.03067e-16	2.14363e-17	2.61762	1.21934	-2.14675	2.52688	1.13926	-2.21799	Slc39a6	solute carrier family 39 (metal ion transporter), member 6	Mus musculus solute carrier family 39 (metal ion transporter), member 6 (Slc39a6), mRNA [NM_139143]	106957	NM_139143	ENSMUST00000070726
A_55_P1985428,A_66_P113102|73683	6.07043e-16	2.16018e-17	-2.19837	1.20078	2.63976	-2.64667	1.19059	3.1511	Atg16l2	autophagy related 16-like 2 (S. cerevisiae)	Mus musculus autophagy related 16-like 2 (S. cerevisiae) (Atg16l2), mRNA [NM_001111111]	73683	NM_001111111	ENSMUST00000139609///ENSMUST00000140553
A_52_P632691|380912	6.15273e-16	2.19191e-17	-3.90777	-1.22819	3.18173	-4.65244	-1.25889	3.69568	Zfp395	zinc finger protein 395	Mus musculus zinc finger protein 395 (Zfp395), mRNA [NM_199029]	380912	NM_199029	ENSMUST00000066994
A_65_P17605,A_51_P241074|26395	6.17418e-16	2.202e-17	2.63748	1.21958	-2.16262	2.4859	1.17471	-2.11617	Map2k1	mitogen-activated protein kinase kinase 1	Mus musculus mitogen-activated protein kinase kinase 1 (Map2k1), mRNA [NM_008927]	26395	NM_008927	ENSMUST00000152535///ENSMUST00000005066
A_51_P467505|21682	6.23392e-16	2.22578e-17	7.36116	1.19458	-6.16212	6.17912	-1.0289	-6.35772	Tec	tec protein tyrosine kinase	Mus musculus tec protein tyrosine kinase (Tec), transcript variant 4, mRNA [NM_013689]	21682	NM_013689	ENSMUST00000073843
A_52_P537381|66254	6.32328e-16	2.2602e-17	2.319	1.197	-1.93735	2.395	1.19193	-2.00935	Dimt1	DIM1 dimethyladenosine transferase 1-like (S. cerevisiae)	Mus musculus DIM1 dimethyladenosine transferase 1-like (S. cerevisiae) (Dimt1), mRNA [NM_025447]	66254	NM_025447	ENSMUST00000022203
A_52_P440836,A_51_P437198,A_55_P2787986|13655	6.36233e-16	2.27668e-17	1.1997	-4.69713	-5.63515	1.11769	-6.87044	-7.67899	Egr3	early growth response 3	Mus musculus early growth response 3 (Egr3), transcript variant 2, mRNA [NM_001289925]///Mus musculus early growth response 3 (Egr3), transcript variant 1, mRNA [NM_018781]	13655	NM_001289925///NM_018781	ENSMUST00000035908
A_52_P378914,A_51_P276599,A_55_P2888017|100317	6.44097e-16	2.30738e-17	-2.76974	-1.109	2.49751	-3.00629	-1.23842	2.42752	AU040320	expressed sequence AU040320	Mus musculus expressed sequence AU040320 (AU040320), transcript variant 1, mRNA [NM_001035526]///Mus musculus expressed sequence AU040320 (AU040320), transcript variant 3, mRNA [NM_133886]	100317	NM_001035526///NM_133886	ENSMUST00000102607///ENSMUST00000047431///ENSMUST00000148935
A_51_P494430|15904	6.46957e-16	2.32277e-17	1.43123	-3.7943	-5.43054	1.36545	-3.87666	-5.29337	Id4	inhibitor of DNA binding 4	Mus musculus inhibitor of DNA binding 4 (Id4), mRNA [NM_031166]	15904	NM_031166	ENSMUST00000021810
A_52_P94845|66257	6.46957e-16	2.32211e-17	-3.32096	-1.17286	2.83152	-3.89507	-1.41375	2.75513	Nicn1	nicolin 1	Mus musculus nicolin 1 (Nicn1), mRNA [NM_025449]	66257	NM_025449	ENSMUST00000035227
A_51_P417186,A_52_P980013,A_52_P621109|57230	6.4868e-16	2.33153e-17	1.55469	-1.07899	-1.67749	1.59879	1.11185	-1.43795	Sap30bp	SAP30 binding protein	Mus musculus SAP30 binding protein (Sap30bp), mRNA [NM_020483]///SAP30 binding protein [Source:MGI Symbol;Acc:MGI:1927479] [ENSMUST00000140991]	57230	NM_020483	ENSMUST00000021101///ENSMUST00000140991
A_52_P556462|211651	6.5231e-16	2.34717e-17	-2.5192	1.00392	2.52907	-2.83342	-1.0239	2.76729	Fancd2	Fanconi anemia, complementation group D2	Mus musculus Fanconi anemia, complementation group D2 (Fancd2), transcript variant q, mRNA [NM_001033244]	211651	NM_001033244	ENSMUST00000204827
A_55_P2154228|78658	6.52961e-16	2.3521e-17	-2.1615	1.11406	2.40804	-2.41506	-1.006	2.40066	Ncapd3	non-SMC condensin II complex, subunit D3	Mus musculus non-SMC condensin II complex, subunit D3 (Ncapd3), mRNA [NM_178113]	78658	NM_178113	ENSMUST00000086198
A_55_P1986781	6.5565e-16	2.36439e-17	-15.3312	-13.471	1.13808	-7.11573	-7.12549	-1.00137
A_52_P612137,A_66_P111047|12395	6.61848e-16	2.38937e-17	-3.18259	-1.07609	2.95755	-3.41203	-1.29792	2.62884	Runx1t1	runt-related transcription factor 1; translocated to, 1 (cyclin D-related)	Mus musculus runt-related transcription factor 1; translocated to, 1 (cyclin D-related) (Runx1t1), transcript variant 3, mRNA [NM_009822]///Mus musculus runt-related transcription factor 1; translocated to, 1 (cyclin D-related) (Runx1t1), transcript variant 1, mRNA [NM_001111027]	12395	NM_009822///NM_001111027	ENSMUST00000098256///ENSMUST00000098257
A_66_P139657,A_51_P151362,A_51_P151371|72667	6.62035e-16	2.39416e-17	-2.99985	-1.29124	2.32323	-2.59408	-1.13273	2.29012	Zfp444	zinc finger protein 444	Mus musculus zinc finger protein 444 (Zfp444), transcript variant 1, mRNA [NM_001146024]///Mus musculus zinc finger protein 444 (Zfp444), transcript variant 2, mRNA [NM_028316]	72667	NM_001146024///NM_028316	ENSMUST00000108567///ENSMUST00000108566///ENSMUST00000208192
A_52_P35915,A_55_P1987261|230088	6.62035e-16	2.39531e-17	2.03644	1.02932	-1.97843	2.15349	-1.04121	-2.24225	Fam214b	family with sequence similarity 214, member B	Mus musculus family with sequence similarity 214, member B (Fam214b), transcript variant 2, mRNA [NM_172691]///Mus musculus family with sequence similarity 214, member B (Fam214b), transcript variant 1, mRNA [NM_001253353]	230088	NM_172691///NM_001253353	ENSMUST00000107958
A_51_P418056,A_52_P67637|235293	6.64653e-16	2.40742e-17	1.53475	1.00764	-1.52311	1.71232	-1.07764	-1.84527	Sc5d	sterol-C5-desaturase	Mus musculus sterol-C5-desaturase (Sc5d), mRNA [NM_172769]///sterol-C5-desaturase [Source:MGI Symbol;Acc:MGI:1353611] [ENSMUST00000052725]	235293	NM_172769///XM_006510253	ENSMUST00000169609///ENSMUST00000052725
A_51_P115178|219151	6.7386e-16	2.44344e-17	-3.89904	-1.11816	3.48701	-3.63957	-1.14872	3.16837	Scara3	scavenger receptor class A, member 3	Mus musculus scavenger receptor class A, member 3 (Scara3), mRNA [NM_172604]	219151	NM_172604	ENSMUST00000042046
A_52_P129114,A_55_P2077009|140500	6.74255e-16	2.44755e-17	2.61231	1.05678	-2.47196	2.74758	1.40214	-1.95957	Acap3	ArfGAP with coiled-coil, ankyrin repeat and PH domains 3	Mus musculus ArfGAP with coiled-coil, ankyrin repeat and PH domains 3 (Acap3), mRNA [NM_207223]	140500	NM_207223	ENSMUST00000105584///ENSMUST00000079031
A_55_P2502211,A_55_P2048560,A_55_P2647853,A_51_P453502,A_55_P2719019|20595	6.77617e-16	2.46245e-17	2.13598	1.16454	-1.83419	2.11303	1.2699	-1.66393	Smn1	survival motor neuron 1	Mus musculus survival motor neuron 1 (Smn1), transcript variant 2, mRNA [NM_001252629]///Mus musculus survival motor neuron 1 (Smn1), transcript variant 1, mRNA [NM_011420]///survival motor neuron 1 [Source:MGI Symbol;Acc:MGI:109257] [ENSMUST00000125572]	20595	NM_001252629///NM_011420	ENSMUST00000022147///ENSMUST00000143937///ENSMUST00000140745///ENSMUST00000135355///ENSMUST00000125572
A_51_P138923|27412	6.82891e-16	2.48432e-17	2.41954	1.23674	-1.95638	2.42498	1.48063	-1.6378	Peg12	paternally expressed 12	Mus musculus paternally expressed 12 (Peg12), mRNA [NM_013788]	27412	NM_013788	ENSMUST00000094339
A_52_P563617|76900	6.86397e-16	2.49981e-17	-1.79697	-1.20825	1.48725	-1.64987	-1.05917	1.5577	Ssbp4	single stranded DNA binding protein 4	Mus musculus single stranded DNA binding protein 4 (Ssbp4), mRNA [NM_133772]	76900	NM_133772	ENSMUST00000210305
A_55_P2931478,A_51_P307370|20181	6.88383e-16	2.50977e-17	-2.2997	-1.39602	1.64733	-2.38093	-1.31728	1.80746	Rxra	retinoid X receptor alpha	Mus musculus retinoid X receptor alpha (Rxra), transcript variant 1, mRNA [NM_011305]	20181	NM_011305	ENSMUST00000077257///ENSMUST00000113934
A_55_P2939181|212712	6.89741e-16	2.51746e-17	2.18798	1.09693	-1.99464	2.13881	1.06066	-2.0165	Satb2	special AT-rich sequence binding protein 2	Mus musculus special AT-rich sequence binding protein 2 (Satb2), mRNA [NM_139146]	212712	NM_139146	ENSMUST00000177424
A_55_P2745603,A_51_P188211|17187	6.95696e-16	2.54472e-17	2.31723	1.16693	-1.98574	2.30485	1.29252	-1.78323	Max	Max protein	Mus musculus Max protein (Max), transcript variant 1, mRNA [NM_008558]	17187	NM_008558	ENSMUST00000218640///ENSMUST00000082136
A_55_P2028961|319554	6.95696e-16	2.54254e-17	1.36025	-1.82114	-2.47721	1.42105	-2.09103	-2.97146	Idi1	isopentenyl-diphosphate delta isomerase	Mus musculus isopentenyl-diphosphate delta isomerase (Idi1), mRNA [NM_145360]	319554	NM_145360	ENSMUST00000169314
A_55_P2647378,A_51_P456890,A_55_P2647388,A_51_P312896,A_55_P2102390|70834	7.02859e-16	2.57372e-17	1.51068	1.0601	-1.42504	1.45863	-1.09574	-1.59828	Spag9	sperm associated antigen 9	Mus musculus sperm associated antigen 9 (Spag9), transcript variant 1, mRNA [NM_027569]///sperm associated antigen 9 [Source:MGI Symbol;Acc:MGI:1918084] [ENSMUST00000138154]///sperm associated antigen 9 [Source:MGI Symbol;Acc:MGI:1918084] [ENSMUST00000127066]///sperm associated antigen 9 [Source:MGI Symbol;Acc:MGI:1918084] [ENSMUST00000132605]///Mus musculus sperm associated antigen 9 (Spag9), tr…	70834	NM_027569///NM_001199203	ENSMUST00000132772///ENSMUST00000138154///ENSMUST00000127066///ENSMUST00000132605///ENSMUST00000092777
A_55_P2078115,A_51_P336083,A_55_P2490450,A_55_P2083664|320119	7.10727e-16	2.60535e-17	1.55715	-1.09769	-1.70926	1.55318	-1.08959	-1.69232	Rps6kc1	ribosomal protein S6 kinase polypeptide 1	Mus musculus ribosomal protein S6 kinase polypeptide 1 (Rps6kc1), mRNA [NM_178775]///ribosomal protein S6 kinase polypeptide 1 [Source:MGI Symbol;Acc:MGI:2443419] [ENSMUST00000159823]	320119	NM_178775	ENSMUST00000162692///ENSMUST00000162500///ENSMUST00000159367///ENSMUST00000159823
A_55_P2719739,A_55_P2023942,A_52_P291197,A_55_P2719734|67200	7.11162e-16	2.60977e-17	-2.37651	-1.29148	1.84014	-2.34824	-1.45465	1.6143	Ccdc77	coiled-coil domain containing 77	coiled-coil domain containing 77 [Source:MGI Symbol;Acc:MGI:1914450] [ENSMUST00000153435]///Mus musculus coiled-coil domain containing 77 (Ccdc77), transcript variant 1, mRNA [NM_026028]///coiled-coil domain containing 77 [Source:MGI Symbol;Acc:MGI:1914450] [ENSMUST00000137271]	67200	NM_026028	ENSMUST00000153435///ENSMUST00000112703///ENSMUST00000146667///ENSMUST00000137271
A_55_P1959263,A_52_P476357|13437	7.13771e-16	2.62218e-17	-1.63864	-1.18257	1.38566	-1.78123	-1.19732	1.48768	Dnpep	aspartyl aminopeptidase	Mus musculus aspartyl aminopeptidase (Dnpep), transcript variant 1, mRNA [NM_001110831]///Mus musculus aspartyl aminopeptidase (Dnpep), transcript variant 2, mRNA [NM_016878]	13437	NM_001110831///NM_016878	ENSMUST00000113605///ENSMUST00000186278
A_52_P226489	7.20849e-16	2.65104e-17	-1.34971	-2.55562	-1.89345	-1.21478	-2.63305	-2.16751			CJ042244 RIKEN full-length enriched mouse cDNA library, C57BL [CJ042244]			ENSMUST00000221823
A_55_P2049577,A_55_P2637296|66549	7.33657e-16	2.70106e-17	2.17999	1.13119	-1.92716	2.15097	1.20546	-1.78435	Aggf1	angiogenic factor with G patch and FHA domains 1	Mus musculus angiogenic factor with G patch and FHA domains 1 (Aggf1), mRNA [NM_025630]///angiogenic factor with G patch and FHA domains 1 [Source:MGI Symbol;Acc:MGI:1913799] [ENSMUST00000161671]	66549	NM_025630	ENSMUST00000022189///ENSMUST00000161671
A_51_P379171|108168763	7.36308e-16	2.71374e-17	-4.47465	-1.44409	3.09859	-4.42626	-1.30401	3.39434	LOC108168763	uncharacterized LOC108168763	PREDICTED: Mus musculus uncharacterized LOC108168763 (LOC108168763), ncRNA [XR_001783320]	108168763	XR_001783320
A_51_P496001|78248	7.37996e-16	2.7229e-17	-4.87838	-1.11622	4.37046	-4.80367	-1.42464	3.37186	Armcx1	armadillo repeat containing, X-linked 1	Mus musculus armadillo repeat containing, X-linked 1 (Armcx1), transcript variant 2, mRNA [NM_030066]	78248	NM_030066	ENSMUST00000113201
A_55_P2729763,A_52_P207151,A_55_P2093221|93836	7.46083e-16	2.7557e-17	1.66008	1.34595	-1.23339	1.67742	1.2769	-1.31367	Rnf111	ring finger 111	ring finger 111 [Source:MGI Symbol;Acc:MGI:1934919] [ENSMUST00000215948]///Mus musculus ring finger 111 (Rnf111), mRNA [NM_033604]	93836	NM_033604	ENSMUST00000215948///ENSMUST00000213647
A_52_P264525,A_55_P2084458,A_55_P1982628,A_55_P2720058|66282	7.50805e-16	2.77612e-17	2.61512	1.14632	-2.28132	2.8058	1.19565	-2.34666	Tma16	translation machinery associated 16	translation machinery associated 16 [Source:MGI Symbol;Acc:MGI:1913532] [ENSMUST00000143972]///translation machinery associated 16 [Source:MGI Symbol;Acc:MGI:1913532] [ENSMUST00000026681]///Mus musculus translation machinery associated 16 (Tma16), mRNA [NM_025465]///translation machinery associated 16 [Source:MGI Symbol;Acc:MGI:1913532] [ENSMUST00000145787]	66282	XM_006509715///NM_025465	ENSMUST00000143972///ENSMUST00000026681///ENSMUST00000145787
A_55_P2715735,A_51_P489268|54392	7.58323e-16	2.80693e-17	-1.9484	1.11716	2.17667	-2.03411	1.00667	2.04767	Ncapg	non-SMC condensin I complex, subunit G	non-SMC condensin I complex, subunit G [Source:MGI Symbol;Acc:MGI:1930197] [ENSMUST00000134090]///Mus musculus non-SMC condensin I complex, subunit G (Ncapg), mRNA [NM_019438]	54392	NM_019438	ENSMUST00000134090///ENSMUST00000134309
A_52_P305748,A_51_P359237|66241	7.64009e-16	2.83101e-17	-2.23912	-1.25825	1.77955	-2.26645	-1.17797	1.92402	Tmem9	transmembrane protein 9	Mus musculus transmembrane protein 9 (Tmem9), transcript variant 2, mRNA [NM_025439]	66241	NM_025439	ENSMUST00000165125///ENSMUST00000063719
A_55_P2742116,A_66_P102711,A_51_P224575|14712	7.70592e-16	2.85847e-17	-1.51523	1.06998	1.62127	-1.52984	1.10472	1.69005	Gnpat	glyceronephosphate O-acyltransferase	Mus musculus glyceronephosphate O-acyltransferase (Gnpat), mRNA [NM_010322]	14712	NM_010322	ENSMUST00000161986///ENSMUST00000161628///ENSMUST00000034466
A_66_P111562|12443	7.88e-16	2.92617e-17	2.49349	1.38366	-1.80209	2.46971	1.44724	-1.7065	Ccnd1	cyclin D1	Mus musculus cyclin D1 (Ccnd1), mRNA [NM_007631]	12443	NM_007631	ENSMUST00000093962
A_66_P112855|106672	7.88787e-16	2.93222e-17	-1.21824	1.33981	1.63222	-1.38779	1.35281	1.87742	AI413582	expressed sequence AI413582	Mus musculus expressed sequence AI413582 (AI413582), mRNA [NM_001002895]	106672	NM_001002895	ENSMUST00000138728
A_55_P2727127,A_55_P2019138,A_52_P418013|14260	7.99057e-16	2.97357e-17	1.73556	1.06904	-1.62347	1.74353	-1.07725	-1.87822	Fmn1	formin 1	Mus musculus formin 1 (Fmn1), transcript variant 1, mRNA [NM_010230]///Mus musculus formin 1 (Fmn1), transcript variant 3, mRNA [NM_001285458]	14260	NM_010230///NM_001285458	ENSMUST00000153151///ENSMUST00000161731///ENSMUST00000150510
A_51_P193259,A_52_P110270|27632	8.04539e-16	2.99717e-17	-1.64285	-1.2477	1.31671	-1.70228	-1.16127	1.46588	Nelfe	negative elongation factor complex member E, Rdbp	Mus musculus negative elongation factor complex member E, Rdbp (Nelfe), transcript variant 3, mRNA [NM_001045864]	27632	NM_001045864	ENSMUST00000173065///ENSMUST00000173357
A_51_P412736|12607	8.11895e-16	3.0278e-17	2.07858	-1.01302	-2.10564	2.03525	-1.02735	-2.0909	Cebpz	CCAAT/enhancer binding protein zeta	Mus musculus CCAAT/enhancer binding protein zeta (Cebpz), mRNA [NM_001024806]	12607	NM_001024806	ENSMUST00000024885
A_55_P2738714,A_66_P136921|14854	8.14333e-16	3.04012e-17	2.62592	-1.0874	-2.85544	2.51712	1.09081	-2.30758	Gss	glutathione synthetase	Mus musculus glutathione synthetase (Gss), transcript variant 1, mRNA [NM_008180]	14854	NM_008180	ENSMUST00000130881///ENSMUST00000175993
A_52_P405772,A_52_P409833|18791	8.24969e-16	3.08311e-17	1.84803	-1.64391	-3.03799	1.61748	-2.08881	-3.37861	Plat	plasminogen activator, tissue	plasminogen activator, tissue [Source:MGI Symbol;Acc:MGI:97610] [ENSMUST00000210960]///Mus musculus plasminogen activator, tissue (Plat), mRNA [NM_008872]	18791	NM_008872	ENSMUST00000210960///ENSMUST00000033941
A_55_P2796718|100503583	8.31051e-16	3.10914e-17	-2.02474	1.0248	2.07495	-1.9592	1.02365	2.00553	Fsbp	fibrinogen silencer binding protein	Mus musculus fibrinogen silencer binding protein (Fsbp), mRNA [NM_001256142]	100503583	NM_001256142	ENSMUST00000095145
A_66_P133203,A_55_P2727574,A_55_P2809320|72151	8.32586e-16	3.11819e-17	-1.59198	-1.06276	1.49797	-1.65423	-1.0117	1.63511	Rfc5	replication factor C (activator 1) 5	replication factor C (activator 1) 5 [Source:MGI Symbol;Acc:MGI:1919401] [ENSMUST00000126262]///replication factor C (activator 1) 5 [Source:MGI Symbol;Acc:MGI:1919401] [ENSMUST00000111953]///Mus musculus replication factor C (activator 1) 5 (Rfc5), mRNA [NM_028128]	72151	NM_028128	ENSMUST00000126262///ENSMUST00000111953///ENSMUST00000150962
A_52_P510382|75619	8.42891e-16	3.16013e-17	1.85536	1.24936	-1.48505	1.70128	1.26636	-1.34344	Fastkd2	FAST kinase domains 2	Mus musculus FAST kinase domains 2 (Fastkd2), mRNA [NM_172422]	75619	NM_172422	ENSMUST00000128621
A_55_P2492643,A_51_P341369,A_55_P2600656,A_55_P2600661|66943	8.51647e-16	3.19704e-17	2.16259	-1.04391	-2.25755	2.23827	1.04114	-2.14983	Pqlc1	PQ loop repeat containing 1	Mus musculus PQ loop repeat containing 1 (Pqlc1), transcript variant 5, mRNA [NM_001164423]///Mus musculus PQ loop repeat containing 1 (Pqlc1), transcript variant 1, mRNA [NM_025861]///Mus musculus PQ loop repeat containing 1 (Pqlc1), transcript variant 2, mRNA [NM_001164420]	66943	NM_001164423///NM_025861///NM_001164420	ENSMUST00000151677///ENSMUST00000131780///ENSMUST00000157056///ENSMUST00000134545
A_65_P03871,A_55_P2803137|243574	8.51647e-16	3.19972e-17	6.07376	1.76542	-3.4404	5.18795	1.95735	-2.65049	Kbtbd8	kelch repeat and BTB (POZ) domain containing 8	Mus musculus kelch repeat and BTB (POZ) domain containing 8 (Kbtbd8), transcript variant 1, mRNA [NM_001008785]	243574	NM_001008785	ENSMUST00000122938///ENSMUST00000032107
A_55_P2746444,A_55_P2183438,A_55_P2907714|12394	8.52432e-16	3.20606e-17	2.52302	-1.15586	-2.91625	2.68789	-1.14416	-3.07539	Runx1	runt related transcription factor 1	Mus musculus runt related transcription factor 1 (Runx1), transcript variant 3, mRNA [NM_001111023]///Mus musculus runt related transcription factor 1 (Runx1), transcript variant 4, mRNA [NM_009821]	12394	NM_001111023///NM_009821	ENSMUST00000023673///ENSMUST00000168195///ENSMUST00000189126
A_30_P01020518	8.53639e-16	3.21399e-17	6.37334	1.56177	-4.08085	8.92112	2.81171	-3.17284			lincRNA:chr9:78104935-78116974 forward strand
A_55_P2905553|627049	8.57965e-16	3.23709e-17	2.11004	-1.26146	-2.66172	2.21746	-1.19399	-2.64762	Zfp800	zinc finger protein 800	Mus musculus zinc finger protein 800 (Zfp800), mRNA [NM_001081678]	627049	NM_001081678	ENSMUST00000123098
A_51_P118650|83669	8.57965e-16	3.2357e-17	-2.42862	-1.25434	1.93617	-2.46185	-1.21685	2.02314	Wdr6	WD repeat domain 6	Mus musculus WD repeat domain 6 (Wdr6), mRNA [NM_031392]	83669	NM_031392	ENSMUST00000068700
A_51_P487518,A_66_P112682|12364	8.58339e-16	3.24318e-17	-2.273	1.22514	2.78474	-2.26534	1.06177	2.40526	Casp12	caspase 12	Mus musculus caspase 12 (Casp12), mRNA [NM_009808]	12364	NM_009808	ENSMUST00000151788///ENSMUST00000151332
A_51_P206268,A_55_P2900160|72124	8.58339e-16	3.24532e-17	1.91797	1.26513	-1.51603	1.94746	1.23045	-1.58273	Seh1l	SEH1-like (S. cerevisiae	Mus musculus SEH1-like (S. cerevisiae (Seh1l), transcript variant 1, mRNA [NM_001039088]///Mus musculus SEH1-like (S. cerevisiae (Seh1l), transcript variant 2, mRNA [NM_028112]	72124	NM_001039088///NM_028112	ENSMUST00000025421
A_51_P269793,A_51_P463120,A_55_P2172852|66775	8.77928e-16	3.32287e-17	-2.34937	-1.6906	1.38966	-2.3583	-2.18519	1.07922	Hacd4	3-hydroxyacyl-CoA dehydratase 4	3-hydroxyacyl-CoA dehydratase 4 [Source:MGI Symbol;Acc:MGI:1914025] [ENSMUST00000151280]///Mus musculus 3-hydroxyacyl-CoA dehydratase 4 (Hacd4), mRNA [NM_025760]	66775	XM_006538189///NM_025760	ENSMUST00000151280///ENSMUST00000030221
A_52_P671002,A_51_P382688,A_51_P390387|67187	8.91688e-16	3.37849e-17	1.92534	1.23644	-1.55716	1.98249	1.48326	-1.33657	Zmynd19	zinc finger, MYND domain containing 19	Mus musculus zinc finger, MYND domain containing 19 (Zmynd19), transcript variant 1, mRNA [NM_026021]///Mus musculus zinc finger, MYND domain containing 19 (Zmynd19), transcript variant 2, mRNA [NM_147179]	67187	NM_026021///NM_147179	ENSMUST00000028350
A_51_P451516,A_55_P2740034|52666	8.96704e-16	3.40106e-17	-2.21433	-1.03629	2.1368	-2.19603	-1.163	1.88825	Arhgef25	Rho guanine nucleotide exchange factor (GEF) 25	Mus musculus Rho guanine nucleotide exchange factor (GEF) 25 (Arhgef25), transcript variant 1, mRNA [NM_028027]	52666	NM_028027	ENSMUST00000167353///ENSMUST00000218587
A_55_P2077635	8.99088e-16	3.41367e-17	2.17329	1.66368	-1.30632	2.274	1.75084	-1.29881			predicted gene 3170 [Source:MGI Symbol;Acc:MGI:3781349] [ENSMUST00000168753]			ENSMUST00000168753
A_51_P453043|78894	9.00443e-16	3.42239e-17	1.29027	-1.31281	-1.69388	1.18816	-1.42383	-1.69174	Aacs	acetoacetyl-CoA synthetase	Mus musculus acetoacetyl-CoA synthetase (Aacs), mRNA [NM_030210]	78894	NM_030210	ENSMUST00000031445
A_52_P327317,A_55_P2735615,A_55_P2293967,A_55_P2729618|72238	9.01439e-16	3.42976e-17	-2.2456	1.04242	2.34086	-2.23641	-1.07798	2.07463	Tbc1d5	TBC1 domain family, member 5	Q571D8_MOUSE (Q571D8) MKIAA0210 protein (Fragment), partial (41%) [TC1595567]///PREDICTED: Mus musculus TBC1 domain family, member 5 (Tbc1d5), transcript variant X2, mRNA [XM_006524965]///Mus musculus TBC1 domain family, member 5 (Tbc1d5), transcript variant 1, mRNA [NM_001285991]///Q571D8_MOUSE (Q571D8) MKIAA0210 protein (Fragment), partial (47%) [TC1587579]	72238	XM_006524965///NM_001285991	ENSMUST00000024717
A_55_P2123162,A_55_P2072631,A_51_P225793|72446	9.15228e-16	3.48586e-17	-2.06977	-1.39787	1.48065	-2.01415	-1.4864	1.35505	Prr5l	proline rich 5 like	proline rich 5 like [Source:MGI Symbol;Acc:MGI:1919696] [ENSMUST00000127358]///Mus musculus proline rich 5 like (Prr5l), transcript variant 1, mRNA [NM_001083810]///Mus musculus proline rich 5 like (Prr5l), transcript variant 2, mRNA [NM_175181]	72446	XM_017319279///NM_001083810///NM_175181	ENSMUST00000127358///ENSMUST00000171088///ENSMUST00000043845
A_52_P476602,A_55_P2727041,A_51_P112174|52906	9.20248e-16	3.51229e-17	-2.31471	-1.22695	1.88656	-2.35881	-1.45225	1.62425	Ahi1	Abelson helper integration site 1	Mus musculus Abelson helper integration site 1 (Ahi1), transcript variant 1, mRNA [NM_026203]	52906	NM_026203	ENSMUST00000163505///ENSMUST00000105525///ENSMUST00000214893
A_52_P71105|170742	9.20248e-16	3.50997e-17	-2.86191	-1.00329	2.85253	-2.63949	1.055	2.78466	Sertad3	SERTA domain containing 3	Mus musculus SERTA domain containing 3 (Sertad3), mRNA [NM_133210]	170742	NM_133210	ENSMUST00000068641
A_66_P116985|103534	9.24196e-16	3.53102e-17	-1.62386	1.12823	1.83209	-1.6809	1.13928	1.91501	Mgat4b	mannoside acetylglucosaminyltransferase 4, isoenzyme B	Mus musculus mannoside acetylglucosaminyltransferase 4, isoenzyme B (Mgat4b), mRNA [NM_145926]	103534	NM_145926	ENSMUST00000122977
A_55_P2354531|69250	9.24532e-16	3.53598e-17	-2.39482	-1.1108	2.15594	-2.70581	-1.10571	2.44713	2610029K11Rik	RIKEN cDNA 2610029K11 gene	BY652773 RIKEN full-length enriched, visual cortex Mus musculus cDNA clone K530306K22 3', mRNA sequence [BY652773]	69250
A_55_P2161545|56200	9.24779e-16	3.5406e-17	4.37449	1.48322	-2.94933	4.53319	1.79711	-2.52249	Ddx21	DEAD (Asp-Glu-Ala-Asp) box polypeptide 21	Mus musculus DEAD (Asp-Glu-Ala-Asp) box polypeptide 21 (Ddx21), mRNA [NM_019553]	56200	NM_019553	ENSMUST00000045866
A_66_P134412,A_55_P2386544|216292	9.26739e-16	3.55178e-17	2.0139	-1.05641	-2.1275	2.1281	1.00226	-2.12329	Mettl25	methyltransferase like 25	Mus musculus methyltransferase like 25 (Mettl25), mRNA [NM_207522]///PREDICTED: Mus musculus methyltransferase like 25 (Mettl25), transcript variant X6, mRNA [XM_017313904]	216292	NM_207522///XM_017313904	ENSMUST00000176924
A_55_P2856510|18131	9.28376e-16	3.56174e-17	-3.16701	-1.20692	2.62404	-2.99801	-1.26379	2.37224	Notch3	notch 3	Mus musculus notch 3 (Notch3), mRNA [NM_008716]	18131	NM_008716	ENSMUST00000087723
A_55_P1966538|66965	9.40377e-16	3.61152e-17	2.0645	1.12423	-1.83637	1.89803	1.30151	-1.45833	Ctu2	cytosolic thiouridylase subunit 2	Mus musculus cytosolic thiouridylase subunit 2 (Ctu2), mRNA [NM_153775]	66965	NM_153775	ENSMUST00000131934
A_51_P115666|105732	9.48038e-16	3.64471e-17	2.31312	-1.07057	-2.47635	2.64563	1.04771	-2.52515	Fam83h	family with sequence similarity 83, member H	Mus musculus family with sequence similarity 83, member H (Fam83h), transcript variant 2, mRNA [NM_134087]	105732	NM_134087	ENSMUST00000170153
A_55_P2590111,A_52_P355057,A_55_P2713535|57773	9.55246e-16	3.67621e-17	2.00761	1.05125	-1.90973	1.8745	1.25821	-1.48982	Wdr4	WD repeat domain 4	WD repeat domain 4 [Source:MGI Symbol;Acc:MGI:1889002] [ENSMUST00000166992]///Mus musculus WD repeat domain 4 (Wdr4), mRNA [NM_021322]///WD repeat domain 4 [Source:MGI Symbol;Acc:MGI:1889002] [ENSMUST00000171592]	57773	NM_021322///XM_006524715	ENSMUST00000166992///ENSMUST00000169454///ENSMUST00000171592
A_51_P431539|69453	9.62985e-16	3.71241e-17	24.6377	1.70121	-14.4824	52.0392	3.27624	-15.8838	Prss56	protease, serine 56	Mus musculus protease, serine 56 (Prss56), mRNA [NM_027084]	69453	NM_027084	ENSMUST00000044533
A_30_P01031174	9.62985e-16	3.71364e-17	3.54476	1.78911	-1.9813	4.01663	1.85582	-2.16434			lincRNA:chr15:62090565-62091770 forward strand
A_51_P355943|192156	9.72661e-16	3.75482e-17	-1.97612	-2.41227	-1.22071	-2.07143	-2.57268	-1.24198	Mvd	mevalonate (diphospho) decarboxylase	Mus musculus mevalonate (diphospho) decarboxylase (Mvd), transcript variant 1, mRNA [NM_138656]	192156	NM_138656	ENSMUST00000211883
A_55_P2028394,A_52_P151126|51897	9.74214e-16	3.76469e-17	-2.15222	-1.18285	1.81952	-2.48797	-1.18663	2.09667	Atg13	autophagy related 13	Mus musculus autophagy related 13 (Atg13), mRNA [NM_145528]///Q2K685_RHIEC (Q2K685) Chromosome partitioning protein A, partial (5%) [TC1622659]	51897	NM_145528	ENSMUST00000028678
A_55_P2915344,A_51_P305320|108902	9.74531e-16	3.76978e-17	-1.67952	-1.10504	1.51987	-1.89623	-1.18256	1.6035	B4gat1	beta-1,4-glucuronyltransferase 1	Mus musculus beta-1,4-glucuronyltransferase 1 (B4gat1), mRNA [NM_175383]	108902	NM_175383	ENSMUST00000053705
A_55_P2717588,A_51_P379822|75991	9.82803e-16	3.80568e-17	2.30796	1.23854	-1.86345	2.18489	1.2287	-1.77821	Slain2	SLAIN motif family, member 2	SLAIN motif family, member 2 [Source:MGI Symbol;Acc:MGI:1923241] [ENSMUST00000183284]///Mus musculus SLAIN motif family, member 2 (Slain2), transcript variant 1, mRNA [NM_153567]	75991	NM_153567	ENSMUST00000183284///ENSMUST00000143829
A_55_P2023446	1.00181e-15	3.88326e-17	1.80768	-1.14394	-2.06788	1.9225	-1.07429	-2.06532
A_55_P2054777|103806	1.00495e-15	3.89941e-17	1.50711	1.11528	-1.35134	1.43743	1.09158	-1.31684	Maml1	mastermind like 1 (Drosophila)	Mus musculus mastermind like 1 (Drosophila) (Maml1), mRNA [NM_175334]	103806	NM_175334	ENSMUST00000059458
A_51_P149699|14789	1.01898e-15	3.95792e-17	-2.20173	-1.07295	2.05204	-2.37552	-1.29809	1.83	P3h3	prolyl 3-hydroxylase 3	Mus musculus prolyl 3-hydroxylase 3 (P3h3), mRNA [NM_013534]	14789	NM_013534	ENSMUST00000126987
A_55_P1955577,A_55_P2713425,A_51_P314895|216527	1.02834e-15	3.99837e-17	1.54944	-1.04107	-1.61307	1.55843	1.0483	-1.48662	Ccm2	cerebral cavernous malformation 2	Mus musculus cerebral cavernous malformation 2 (Ccm2), transcript variant 1, mRNA [NM_146014]///cerebral cavernous malformation 2 [Source:MGI Symbol;Acc:MGI:2384924] [ENSMUST00000144293]	216527	NM_146014	ENSMUST00000109721///ENSMUST00000144293///ENSMUST00000109722
A_55_P2716707,A_55_P1975185|20775	1.03195e-15	4.01648e-17	1.1545	-1.63559	-1.8883	1.22959	-1.72504	-2.12108	Sqle	squalene epoxidase	squalene epoxidase [Source:MGI Symbol;Acc:MGI:109296] [ENSMUST00000161953]///Mus musculus squalene epoxidase (Sqle), mRNA [NM_009270]	20775	NM_009270	ENSMUST00000161953///ENSMUST00000022977
A_65_P04602,A_55_P1960456|73158	1.04052e-15	4.05397e-17	2.07127	1.42026	-1.45837	2.02941	1.43227	-1.41693	Larp1	La ribonucleoprotein domain family, member 1	Mus musculus La ribonucleoprotein domain family, member 1 (Larp1), mRNA [NM_028451]	73158	NM_028451	ENSMUST00000071487
A_55_P2810180|108159	1.04233e-15	4.06517e-17	1.76151	1.04074	-1.69255	1.6899	1.17808	-1.43445	Ubxn8	UBX domain protein 8	Mus musculus UBX domain protein 8 (Ubxn8), mRNA [NM_178648]	108159	NM_178648	ENSMUST00000095349
A_55_P2416862,A_55_P1989573|72392	1.06096e-15	4.14205e-17	-3.22413	-1.33948	2.407	-3.63813	-1.43147	2.54153	Tmem175	transmembrane protein 175	AV247726 RIKEN full-length enriched, 0 day neonate head Mus musculus cDNA clone 4832439D14 3'. [AV247726]///Mus musculus transmembrane protein 175 (Tmem175), transcript variant 1, mRNA [NM_028223]	72392	NM_028223	ENSMUST00000120327
A_51_P409039,A_66_P127621|93747	1.06406e-15	4.15836e-17	-2.02877	-1.57122	1.2912	-1.93352	-1.71109	1.12999	Echs1	enoyl Coenzyme A hydratase, short chain, 1, mitochondrial	Mus musculus enoyl Coenzyme A hydratase, short chain, 1, mitochondrial (Echs1), mRNA [NM_053119]	93747	NM_053119	ENSMUST00000155647///ENSMUST00000125337
A_55_P2031999,A_52_P553589|217830	1.06814e-15	4.17857e-17	-3.10852	1.10559	3.43675	-3.19652	-1.02276	3.12538	9030617O03Rik	RIKEN cDNA 9030617O03 gene	Mus musculus RIKEN cDNA 9030617O03 gene (9030617O03Rik), mRNA [NM_145448]///RIKEN cDNA 9030617O03 gene [Source:MGI Symbol;Acc:MGI:2444813] [ENSMUST00000110070]	217830	NM_145448///XR_872935	ENSMUST00000167322///ENSMUST00000110070
A_51_P392350,A_55_P2007010,A_55_P2715081,A_52_P68702|232288	1.07199e-15	4.19786e-17	-3.95099	-1.26135	3.13236	-4.0457	-1.49491	2.70632	Frmd4b	FERM domain containing 4B	Mus musculus FERM domain containing 4B (Frmd4b), transcript variant 3, mRNA [NM_145148]///FERM domain containing 4B [Source:MGI Symbol;Acc:MGI:2141794] [ENSMUST00000113353]///FERM domain containing 4B [Source:MGI Symbol;Acc:MGI:2141794] [ENSMUST00000126899]	232288	NM_145148	ENSMUST00000113359///ENSMUST00000113353///ENSMUST00000126899///ENSMUST00000032146
A_51_P315673|236733	1.07261e-15	4.20458e-17	-3.52386	-1.48419	2.37426	-3.5927	-1.87256	1.91861	Usp11	ubiquitin specific peptidase 11	Mus musculus ubiquitin specific peptidase 11 (Usp11), mRNA [NM_145628]	236733	NM_145628	ENSMUST00000149960
A_51_P135004|232784	1.07424e-15	4.21521e-17	-1.56588	-1.0712	1.4618	-1.62754	-1.1269	1.44426	Zfp212	Zinc finger protein 212	Mus musculus Zinc finger protein 212 (Zfp212), transcript variant 1, mRNA [NM_145576]	232784	NM_145576	ENSMUST00000009411
A_65_P05631,A_55_P2731811,A_51_P295022|17999	1.0762e-15	4.2272e-17	-1.87868	-1.72836	1.08697	-1.69173	-1.6806	1.00662	Nedd4	neural precursor cell expressed, developmentally down-regulated 4	neural precursor cell expressed, developmentally down-regulated 4 [Source:MGI Symbol;Acc:MGI:97297] [ENSMUST00000184180]///neural precursor cell expressed, developmentally down-regulated 4 [Source:MGI Symbol;Acc:MGI:97297] [ENSMUST00000184450]///Mus musculus neural precursor cell expressed, developmentally down-regulated 4 (Nedd4), mRNA [NM_010890]	17999	NM_010890	ENSMUST00000184180///ENSMUST00000184450///ENSMUST00000183451
A_66_P124715|19015	1.08961e-15	4.28418e-17	2.17566	1.01065	-2.15274	2.45801	1.19492	-2.05704	Ppard	peroxisome proliferator activator receptor delta	Mus musculus peroxisome proliferator activator receptor delta (Ppard), mRNA [NM_011145]	19015	NM_011145	ENSMUST00000002320
A_55_P1969850,A_51_P138859|72098	1.10398e-15	4.34508e-17	2.83134	1.16558	-2.42913	2.6776	1.2351	-2.16791	Tmem68	transmembrane protein 68	Mus musculus transmembrane protein 68 (Tmem68), mRNA [NM_028097]	72098	NM_028097	ENSMUST00000029891///ENSMUST00000154922
A_55_P2034893|192157	1.11155e-15	4.37929e-17	1.79753	1.14117	-1.57516	1.7226	1.06898	-1.61145	Socs7	suppressor of cytokine signaling 7	Mus musculus suppressor of cytokine signaling 7 (Socs7), mRNA [NM_138657]	192157	NM_138657	ENSMUST00000045540
A_55_P2737219,A_55_P2909805|76485	1.12089e-15	4.42054e-17	-2.21474	-1.1833	1.87166	-2.3737	-1.41161	1.68156	Glt8d1	glycosyltransferase 8 domain containing 1	Mus musculus glycosyltransferase 8 domain containing 1 (Glt8d1), transcript variant 1, mRNA [NM_029626]	76485	NM_029626	ENSMUST00000022476
A_51_P176071|234728	1.12122e-15	4.42628e-17	2.40205	1.10166	-2.18039	2.47262	1.10837	-2.23086	Cmtr2	cap methyltransferase 2	Mus musculus cap methyltransferase 2 (Cmtr2), mRNA [NM_146215]	234728	NM_146215	ENSMUST00000056972
A_55_P2091461|12363	1.12752e-15	4.45564e-17	-1.76751	1.11094	1.9636	-1.74033	-1.0202	1.70586	Casp4	caspase 4, apoptosis-related cysteine peptidase	Mus musculus caspase 4, apoptosis-related cysteine peptidase (Casp4), mRNA [NM_007609]	12363	NM_007609	ENSMUST00000027012
A_55_P2097508|328949	1.13009e-15	4.47028e-17	2.36846	1.19964	-1.97431	2.36696	1.08729	-2.17694	Mcc	mutated in colorectal cancers	Mus musculus mutated in colorectal cancers (Mcc), transcript variant 1, mRNA [NM_001085373]	328949	NM_001085373	ENSMUST00000089874
A_52_P681456,A_51_P245631|74013	1.13101e-15	4.47842e-17	-2.1489	1.09508	2.35322	-2.1005	1.14062	2.39587	Rftn2	raftlin family member 2	Mus musculus raftlin family member 2 (Rftn2), mRNA [NM_028713]	74013	NM_028713	ENSMUST00000132055///ENSMUST00000027121
A_51_P502614|67603	1.14029e-15	4.51967e-17	1.65566	-1.25811	-2.083	1.78595	-1.21152	-2.16372	Dusp6	dual specificity phosphatase 6	Mus musculus dual specificity phosphatase 6 (Dusp6), mRNA [NM_026268]	67603	NM_026268	ENSMUST00000020118
A_52_P534620,A_55_P2494638,A_55_P2588147,A_55_P2927328|218885	1.14243e-15	4.53271e-17	-2.12045	-1.00546	2.10894	-2.26075	-1.05682	2.13921	Oxnad1	oxidoreductase NAD-binding domain containing 1	Mus musculus oxidoreductase NAD-binding domain containing 1 (Oxnad1), mRNA [NM_145460]///oxidoreductase NAD-binding domain containing 1 [Source:MGI Symbol;Acc:MGI:1916953] [ENSMUST00000166810]	218885	NM_145460	ENSMUST00000022462///ENSMUST00000170519///ENSMUST00000164396///ENSMUST00000166810
A_55_P2732528|16173	1.14902e-15	4.56339e-17	-2.28696	-2.96999	-1.29867	-2.24052	-3.64368	-1.62627	Il18	interleukin 18	Mus musculus interleukin 18 (Il18), mRNA [NM_008360]	16173	NM_008360	ENSMUST00000213916
A_51_P159415|20466	1.16572e-15	4.63436e-17	-1.96234	1.33323	2.61626	-1.91403	1.24276	2.37868	Sin3a	transcriptional regulator, SIN3A (yeast)	Mus musculus transcriptional regulator, SIN3A (yeast) (Sin3a), transcript variant 1, mRNA [NM_011378]	20466	NM_011378	ENSMUST00000168678
A_65_P08033,A_51_P493467|110033	1.17142e-15	4.66169e-17	-2.08453	-1.0757	1.93784	-2.1127	1.01101	2.13595	Kif22	kinesin family member 22	kinesin family member 22 [Source:MGI Symbol;Acc:MGI:109233] [ENSMUST00000206412]///Mus musculus kinesin family member 22 (Kif22), mRNA [NM_145588]	110033	NM_145588	ENSMUST00000206412///ENSMUST00000206655
A_30_P01026536	1.17767e-15	4.6912e-17	-2.80842	-1.17416	2.39185	-2.62957	-1.31294	2.00282			lincRNA:chr1:163508244-163586072 forward strand
A_66_P137563	1.17804e-15	4.69737e-17	-7.69868	-2.17106	3.54605	-6.81731	-2.30702	2.95503			BY735452 RIKEN full-length enriched, mammary gland RCB-0527 Jyg-MC(B) cDNA Mus musculus cDNA clone G930037M17 5'. [BY735452]
A_55_P2319020|767815	1.18243e-15	4.71957e-17	-2.92457	1.16106	3.3956	-2.51931	1.05717	2.66334	BB557941	expressed sequence BB557941	Mus musculus expressed sequence BB557941 (BB557941), long non-coding RNA [NR_040356]	767815	NR_040356
A_55_P2811630,A_52_P51854|227094	1.18734e-15	4.74387e-17	-3.54987	-1.05655	3.35986	-4.44389	-1.44909	3.06668	Nemp2	nuclear envelope integral membrane protein 2	Mus musculus nuclear envelope integral membrane protein 2 (Nemp2), transcript variant 1, mRNA [NM_001142647]	227094	NM_001142647	ENSMUST00000186903///ENSMUST00000191076
A_55_P2027822,A_66_P130884,A_55_P1981794|75565	1.18815e-15	4.75186e-17	1.9958	1.11381	-1.79187	1.9945	1.44922	-1.37626	Sgf29	SAGA complex associated factor 29	Mus musculus SAGA complex associated factor 29 (Sgf29), mRNA [NM_029339]	75565	NM_029339	ENSMUST00000032956///ENSMUST00000123571///ENSMUST00000138794
A_52_P257590,A_55_P2717877,A_55_P2092526|21815	1.21264e-15	4.8546e-17	1.57426	1.18963	-1.32332	1.70005	1.07011	-1.58866	Tgif1	TGFB-induced factor homeobox 1	Mus musculus TGFB-induced factor homeobox 1 (Tgif1), transcript variant 2, mRNA [NM_009372]///TGFB-induced factor homeobox 1 [Source:MGI Symbol;Acc:MGI:1194497] [ENSMUST00000190687]///Mus musculus TGFB-induced factor homeobox 1 (Tgif1), transcript variant 1, mRNA [NM_001164075]	21815	NM_009372///NM_001164075	ENSMUST00000135007///ENSMUST00000190687///ENSMUST00000166395
A_55_P2735435|26411	1.21656e-15	4.87514e-17	-3.80155	-1.14867	3.30953	-3.4378	-1.08026	3.1824	Map4k1	mitogen-activated protein kinase kinase kinase kinase 1	Mus musculus mitogen-activated protein kinase kinase kinase kinase 1 (Map4k1), mRNA [NM_008279]	26411	NM_008279	ENSMUST00000208784
A_55_P2197338|100503827	1.23054e-15	4.93602e-17	-4.25151	-1.29366	3.28643	-4.75531	-1.48752	3.1968	Tnfsf13os	tumor necrosis factor (ligand) superfamily, member 13, opposite strand	PREDICTED: Mus musculus tumor necrosis factor (ligand) superfamily, member 13, opposite strand (Tnfsf13os), transcript variant X1, ncRNA [XR_879970]	100503827	XR_879970
A_51_P202596,A_55_P2731541,A_66_P118801|225608	1.23652e-15	4.96494e-17	-1.8164	-1.29787	1.39952	-1.87948	-1.46791	1.28038	Sh3tc2	SH3 domain and tetratricopeptide repeats 2	Mus musculus SH3 domain and tetratricopeptide repeats 2 (Sh3tc2), mRNA [NM_172628]///S3TC2_MOUSE (Q80VA5) SH3 domain and tetratricopeptide repeats-containing protein 2, partial (10%) [TC1596628]	225608	NM_172628	ENSMUST00000051720
A_51_P221972,A_66_P138084|70511	1.2516e-15	5.03047e-17	-2.20687	-1.0934	2.01835	-2.35518	-1.16445	2.02258	Eef2kmt	eukaryotic elongation factor 2 lysine methyltransferase	Mus musculus eukaryotic elongation factor 2 lysine methyltransferase (Eef2kmt), mRNA [NM_027446]	70511	NM_027446	ENSMUST00000129729///ENSMUST00000132225
A_55_P2159710,A_55_P2102693|11477	1.25439e-15	5.04666e-17	1.70662	-1.02429	-1.74807	1.68985	-1.0658	-1.80103	Acvr1	activin A receptor, type 1	Mus musculus activin A receptor, type 1 (Acvr1), transcript variant 1, mRNA [NM_001110204]	11477	NM_001110204	ENSMUST00000090935///ENSMUST00000056376
A_55_P2916048|27419	1.26135e-15	5.07966e-17	-2.0044	1.01237	2.02919	-2.1338	-1.17445	1.81684	Naglu	alpha-N-acetylglucosaminidase (Sanfilippo disease IIIB)	Mus musculus alpha-N-acetylglucosaminidase (Sanfilippo disease IIIB) (Naglu), mRNA [NM_013792]	27419	NM_013792	ENSMUST00000001802
A_52_P127465,A_55_P2497772,A_65_P04635|106369	1.26691e-15	5.1296e-17	-3.69843	-1.39256	2.65584	-3.60912	-1.55077	2.32731	Ypel1	yippee-like 1 (Drosophila)	Mus musculus yippee-like 1 (Drosophila) (Ypel1), transcript variant 2, mRNA [NM_023249]///Mus musculus yippee-like 1 (Drosophila) (Ypel1), transcript variant 1, mRNA [NM_001291047]///yippee-like 1 (Drosophila) [Source:MGI Symbol;Acc:MGI:1913303] [ENSMUST00000150987]	106369	NM_023249///NM_001291047	ENSMUST00000115729///ENSMUST00000153489///ENSMUST00000150987
A_55_P2129172|217371	1.26691e-15	5.11886e-17	-4.19329	-2.62627	1.59667	-4.16824	-3.63652	1.14622	Rab40b	Rab40B, member RAS oncogene family	Mus musculus Rab40B, member RAS oncogene family (Rab40b), mRNA [NM_139147]	217371	NM_139147	ENSMUST00000106107
A_55_P1989452|66208	1.26691e-15	5.13224e-17	-1.48612	-1.54212	-1.03768	-1.35088	-1.55989	-1.15472	Nenf	neuron derived neurotrophic factor	Mus musculus neuron derived neurotrophic factor (Nenf), mRNA [NM_025424]	66208	NM_025424	ENSMUST00000046770
A_30_P01018964	1.26691e-15	5.1264e-17	-1.74218	1.25102	2.1795	-1.69558	1.12805	1.9127			lincRNA:chr2:153163620-153170845 reverse strand
A_55_P2106175|14528	1.26691e-15	5.13131e-17	2.8665	1.09437	-2.61933	2.6665	1.01318	-2.63181	Gch1	GTP cyclohydrolase 1	Mus musculus GTP cyclohydrolase 1 (Gch1), mRNA [NM_008102]	14528	NM_008102	ENSMUST00000089959
A_55_P2816320|211064	1.26691e-15	5.11493e-17	2.15826	1.19813	-1.80136	2.16975	1.15478	-1.87893	Alkbh1	alkB homolog 1, histone H2A dioxygenase	Mus musculus alkB homolog 1, histone H2A dioxygenase (Alkbh1), mRNA [NM_001102565]	211064	NM_001102565	ENSMUST00000161712
A_30_P01032180	1.27319e-15	5.16276e-17	3.23025	1.73126	-1.86583	3.25463	1.91485	-1.69968			lincRNA:chr5:74487385-74497428 forward strand
A_55_P2759855,A_55_P2101757|72107	1.27371e-15	5.1706e-17	-2.527	1.09759	2.77362	-2.75103	1.01008	2.77876	Dscc1	DNA replication and sister chromatid cohesion 1	DNA replication and sister chromatid cohesion 1 [Source:MGI Symbol;Acc:MGI:1919357] [ENSMUST00000143523]///Mus musculus DNA replication and sister chromatid cohesion 1 (Dscc1), mRNA [NM_183089]	72107	NM_183089	ENSMUST00000143523///ENSMUST00000110231
A_55_P2002562,A_52_P242973|56529	1.27371e-15	5.17498e-17	1.39788	-1.03925	-1.45275	1.42089	-1.05847	-1.50397	Sec11a	SEC11 homolog A, signal peptidase complex subunit	Mus musculus SEC11 homolog A, signal peptidase complex subunit (Sec11a), mRNA [NM_019951]	56529	NM_019951	ENSMUST00000117383
A_52_P269057,A_51_P422165|77766	1.27517e-15	5.18598e-17	-3.09484	-1.06182	2.91465	-3.07226	-1.21828	2.52179	Elp4	elongator acetyltransferase complex subunit 4	Mus musculus elongator acetyltransferase complex subunit 4 (Elp4), mRNA [NM_023876]	77766	NM_023876	ENSMUST00000028588
A_66_P130467,A_55_P2713990,A_55_P2502516|56695	1.28101e-15	5.21988e-17	-1.50374	-1.00709	1.49315	-1.58307	1.01666	1.60945	Pnkd	paroxysmal nonkinesiogenic dyskinesia	Mus musculus paroxysmal nonkinesiogenic dyskinesia (Pnkd), transcript variant 2, mRNA [NM_025580]///paroxysmal nonkinesiogenic dyskinesia [Source:MGI Symbol;Acc:MGI:1930773] [ENSMUST00000190398]///Mus musculus paroxysmal nonkinesiogenic dyskinesia (Pnkd), transcript variant 3, mRNA [NM_001039509]	56695	NM_025580///NM_001039509	ENSMUST00000152492///ENSMUST00000190398///ENSMUST00000027370
A_52_P220163|76100	1.28101e-15	5.21674e-17	-3.01648	1.18181	3.5649	-2.95014	1.02274	3.01721	5830454E08Rik	RIKEN cDNA 5830454E08 gene	Mus musculus RIKEN cDNA 5830454E08 gene (5830454E08Rik), long non-coding RNA [NR_073359]	76100	NR_073359
A_51_P267986|209224	1.29067e-15	5.26438e-17	-6.13014	-1.22296	5.01254	-7.29804	-1.58289	4.61059	Enox2	ecto-NOX disulfide-thiol exchanger 2	Mus musculus ecto-NOX disulfide-thiol exchanger 2 (Enox2), transcript variant 2, mRNA [NM_145951]	209224	NM_145951	ENSMUST00000114918
A_55_P2721279,A_51_P495641,A_55_P2043862|16765	1.29239e-15	5.27654e-17	-1.72161	-1.27544	1.34981	-1.69976	-1.32048	1.28723	Stmn1	stathmin 1	stathmin 1 [Source:MGI Symbol;Acc:MGI:96739] [ENSMUST00000130253]///Mus musculus stathmin 1 (Stmn1), mRNA [NM_019641]	16765	NM_019641	ENSMUST00000130253///ENSMUST00000030636
A_66_P116999,A_55_P2818898,A_55_P2008687|18099	1.30201e-15	5.32099e-17	2.28478	1.54678	-1.47712	2.31113	1.49774	-1.54308	Nlk	nemo like kinase	Mus musculus nemo like kinase (Nlk), mRNA [NM_008702]	18099	NM_008702	ENSMUST00000170394///ENSMUST00000165271///ENSMUST00000142739
A_51_P443723|228368	1.30361e-15	5.33269e-17	2.30353	1.12909	-2.04016	2.33775	1.20306	-1.94318	Slc35c1	solute carrier family 35, member C1	Mus musculus solute carrier family 35, member C1 (Slc35c1), transcript variant 1, mRNA [NM_211358]	228368	NM_211358	ENSMUST00000125276
A_52_P262096,A_51_P124719,A_55_P2722218|70829	1.31366e-15	5.38004e-17	1.94311	1.38455	-1.40342	1.82304	1.47969	-1.23204	Ccdc93	coiled-coil domain containing 93	Mus musculus coiled-coil domain containing 93 (Ccdc93), transcript variant 3, mRNA [NM_029955]///Mus musculus coiled-coil domain containing 93 (Ccdc93), transcript variant 1, mRNA [NM_001025156]///coiled-coil domain containing 93 [Source:MGI Symbol;Acc:MGI:1918079] [ENSMUST00000152959]	70829	NM_029955///NM_001025156	ENSMUST00000128924///ENSMUST00000112621///ENSMUST00000152959
A_51_P296905,A_52_P659258|231327	1.31366e-15	5.38425e-17	2.07314	1.40892	-1.47145	2.14483	1.43731	-1.49226	Ppat	phosphoribosyl pyrophosphate amidotransferase	Mus musculus phosphoribosyl pyrophosphate amidotransferase (Ppat), mRNA [NM_172146]	231327	NM_172146	ENSMUST00000140076///ENSMUST00000031158
A_51_P125050,A_55_P2735835|107071	1.3326e-15	5.46717e-17	2.22249	1.12628	-1.97331	2.26546	1.32872	-1.705	Wdr74	WD repeat domain 74	Mus musculus WD repeat domain 74 (Wdr74), mRNA [NM_134139]	107071	NM_134139	ENSMUST00000049424///ENSMUST00000210512
A_51_P255699|17392	1.33771e-15	5.49344e-17	1.11181	2.11574	1.90296	1.09834	1.98698	1.80907	Mmp3	matrix metallopeptidase 3	Mus musculus matrix metallopeptidase 3 (Mmp3), mRNA [NM_010809]	17392	NM_010809	ENSMUST00000034497
A_55_P2031125,A_55_P2141943|56791	1.34344e-15	5.5223e-17	-2.35272	-1.27672	1.84279	-2.16235	-1.25345	1.72512	Ube2l6	ubiquitin-conjugating enzyme E2L 6	Mus musculus ubiquitin-conjugating enzyme E2L 6 (Ube2l6), mRNA [NM_019949]///ubiquitin-conjugating enzyme E2L 6 [Source:MGI Symbol;Acc:MGI:1914500] [ENSMUST00000102642]	56791	NM_019949	ENSMUST00000102642
A_55_P2534047,A_51_P191601|77034	1.34462e-15	5.5325e-17	1.64743	1.22046	-1.34984	1.72809	1.27339	-1.35708	2510039O18Rik	RIKEN cDNA 2510039O18 gene	Q69Z34_MOUSE (Q69Z34) MKIAA2013 protein (Fragment), partial (46%) [TC1610832]///Mus musculus RIKEN cDNA 2510039O18 gene (2510039O18Rik), mRNA [NM_029841]	77034	NM_029841	ENSMUST00000103232
A_52_P1197192,A_55_P2051834|244864	1.34723e-15	5.54997e-17	2.33042	1.3661	-1.70589	2.33003	1.39736	-1.66746	Layn	layilin	PREDICTED: Mus musculus layilin (Layn), transcript variant X1, mRNA [XM_006510329]///Mus musculus layilin (Layn), mRNA [NM_001033534]	244864	XM_006510329///NM_001033534	ENSMUST00000214090
A_55_P1991440|22697	1.34723e-15	5.55393e-17	-1.65783	-1.22923	1.34867	-1.77905	-1.22597	1.45115	Zscan21	zinc finger and SCAN domain containing 21	Mus musculus zinc finger and SCAN domain containing 21 (Zscan21), transcript variant 1, mRNA [NM_011757]	22697	NM_011757	ENSMUST00000110961
A_51_P169614|105372	1.35018e-15	5.57144e-17	2.93968	1.43766	-2.04476	2.85368	1.43173	-1.99318	Utp15	UTP15 small subunit processome component	Mus musculus UTP15 small subunit processome component (Utp15), mRNA [NM_178918]	105372	NM_178918	ENSMUST00000040972
A_52_P357241,A_55_P1957319,A_52_P555382|52705	1.36016e-15	5.61803e-17	2.02481	1.11196	-1.82093	1.99116	1.17997	-1.68747	Krr1	KRR1, small subunit (SSU) processome component, homolog (yeast)	KRR1, small subunit (SSU) processome component, homolog (yeast) [Source:MGI Symbol;Acc:MGI:1289274] [ENSMUST00000162678]///Mus musculus KRR1, small subunit (SSU) processome component, homolog (yeast) (Krr1), mRNA [NM_178610]	52705	NM_178610	ENSMUST00000162678///ENSMUST00000075924
A_51_P379660|56772	1.36196e-15	5.63087e-17	2.4815	1.53308	-1.61863	2.42264	1.52228	-1.59146	Mllt11	myeloid/lymphoid or mixed-lineage leukemia; translocated to, 11	Mus musculus myeloid/lymphoid or mixed-lineage leukemia; translocated to, 11 (Mllt11), mRNA [NM_019914]	56772	NM_019914	ENSMUST00000065482
A_51_P299632|70997	1.37221e-15	5.6787e-17	2.38885	1.22717	-1.94663	2.64197	1.30925	-2.01793	Spef1	sperm flagellar 1	Mus musculus sperm flagellar 1 (Spef1), mRNA [NM_027641]	70997	NM_027641	ENSMUST00000110218
A_52_P522379,A_55_P2499018|65964	1.37282e-15	5.68667e-17	2.08043	1.23927	-1.67875	2.01302	1.19674	-1.68208	Map3k20	mitogen-activated protein kinase kinase kinase 20	Mus musculus mitogen-activated protein kinase kinase kinase 20 (Map3k20), transcript variant 2, mRNA [NM_178084]///Mus musculus mitogen-activated protein kinase kinase kinase 20 (Map3k20), transcript variant 1, mRNA [NM_023057]	65964	NM_178084///NM_023057	ENSMUST00000150126///ENSMUST00000090824
A_51_P206655,A_55_P2935261|67207	1.38783e-15	5.75439e-17	1.62058	1.23888	-1.30811	1.60753	1.18425	-1.35742	Lsm1	LSM1 homolog, mRNA degradation associated	Mus musculus LSM1 homolog, mRNA degradation associated (Lsm1), mRNA [NM_026032]///Q5E9Z8_BOVIN (Q5E9Z8) Lsm1 protein, partial (58%) [TC1607469]	67207	NM_026032	ENSMUST00000038421
A_51_P425737,A_55_P2487749|67046	1.3887e-15	5.76899e-17	-1.75052	-1.14737	1.52568	-1.71142	-1.09466	1.56343	Tbc1d7	TBC1 domain family, member 7	Mus musculus TBC1 domain family, member 7 (Tbc1d7), transcript variant 2, mRNA [NM_025935]///Mus musculus TBC1 domain family, member 7 (Tbc1d7), transcript variant 1, mRNA [NM_001252639]	67046	NM_025935///NM_001252639	ENSMUST00000223076///ENSMUST00000021797
A_55_P1990086,A_66_P130026|380718	1.3887e-15	5.76843e-17	-2.06974	-1.0283	2.01277	-2.19958	-1.01356	2.17016	Mks1	Meckel syndrome, type 1	Mus musculus Meckel syndrome, type 1 (Mks1), mRNA [NM_001039684]	380718	NM_001039684	ENSMUST00000038196///ENSMUST00000135369
A_55_P2009732|109314	1.39676e-15	5.80806e-17	3.71399	-1.7613	-6.54144	3.57714	-1.70271	-6.09084	Prr9	proline rich 9	Mus musculus proline rich 9 (Prr9), mRNA [NM_175424]	109314	NM_175424	ENSMUST00000070284
A_55_P2494862,A_55_P2149293,A_51_P496074|231801	1.39677e-15	5.81361e-17	-1.89612	-1.34746	1.40718	-1.92112	-1.34156	1.43201	Agfg2	ArfGAP with FG repeats 2	Mus musculus ArfGAP with FG repeats 2 (Agfg2), transcript variant 2, mRNA [NM_178162]///ArfGAP with FG repeats 2 [Source:MGI Symbol;Acc:MGI:2443267] [ENSMUST00000138604]	231801	NM_178162	ENSMUST00000151839///ENSMUST00000138604///ENSMUST00000147518
A_66_P124515	1.41371e-15	5.88977e-17	-27.5359	-14.8067	1.85969	-16.9492	-14.0662	1.20496			Q6PWM4_BOVIN (Q6PWM4) Phosphoribosylformylglycinamidine synthase (Fragment) , partial (19%) [TC1592465]
A_52_P679101,A_52_P396042|21873	1.41536e-15	5.90224e-17	2.52642	-1.01133	-2.55504	2.40265	1.02204	-2.35083	Tjp2	tight junction protein 2	Mus musculus tight junction protein 2 (Tjp2), transcript variant 2, mRNA [NM_011597]	21873	NM_011597	ENSMUST00000099558
A_51_P165087|20613	1.43177e-15	5.97639e-17	1.55172	-1.71118	-2.65527	1.26866	-2.02299	-2.56648	Snai1	snail family zinc finger 1	Mus musculus snail family zinc finger 1 (Snai1), mRNA [NM_011427]	20613	NM_011427	ENSMUST00000052631
A_51_P234044|68918	1.44419e-15	6.03744e-17	-2.95424	-1.45129	2.03559	-3.04971	-1.41031	2.16243	1190005I06Rik	RIKEN cDNA 1190005I06 gene	Mus musculus RIKEN cDNA 1190005I06 gene (1190005I06Rik), mRNA [NM_197988]	68918	NM_197988	ENSMUST00000123927
A_51_P464340,A_55_P2020743|224814	1.44419e-15	6.03969e-17	-4.51761	-1.09603	4.1218	-3.96153	-1.23154	3.21674	Abcc10	ATP-binding cassette, sub-family C (CFTR/MRP), member 10	Mus musculus ATP-binding cassette, sub-family C (CFTR/MRP), member 10 (Abcc10), transcript variant mrp7A, mRNA [NM_145140]	224814	NM_145140	ENSMUST00000095261///ENSMUST00000047970
A_55_P1965620,A_51_P487105,A_52_P227065,A_66_P108520|231889	1.44475e-15	6.04776e-17	1.61968	1.02637	-1.57807	1.70338	1.1145	-1.52838	Bud31	BUD31 homolog	Mus musculus BUD31 homolog (Bud31), transcript variant 1, mRNA [NM_001310770]///BUD31 homolog [Source:MGI Symbol;Acc:MGI:2141291] [ENSMUST00000159018]	231889	NM_001310770	ENSMUST00000159018///ENSMUST00000161974///ENSMUST00000160840
A_52_P147903,A_55_P2023136,A_51_P291529,A_55_P2011525|235315	1.4497e-15	6.07423e-17	-1.33487	1.13092	1.50964	-1.43266	1.07285	1.53703	Rnf214	ring finger protein 214	Mus musculus ring finger protein 214 (Rnf214), transcript variant 1, mRNA [NM_178709]///PREDICTED: Mus musculus ring finger protein 214 (Rnf214), transcript variant X3, mRNA [XM_011242496]	235315	NM_178709///XM_011242496	ENSMUST00000160699///ENSMUST00000161187
A_55_P1967553|100039192	1.45641e-15	6.10816e-17	-2.54402	-1.22954	2.06907	-2.39927	-1.20905	1.98443	Tmem254c	transmembrane protein 254c	Mus musculus transmembrane protein 254c (Tmem254c), transcript variant 1, mRNA [NM_001270498]	100039192	NM_001270498	ENSMUST00000100813
A_55_P2074924|333654	1.46073e-15	6.13208e-17	2.19881	1.16724	-1.88376	2.16122	1.20629	-1.79162	Ppp1r13l	protein phosphatase 1, regulatory (inhibitor) subunit 13 like	Mus musculus protein phosphatase 1, regulatory (inhibitor) subunit 13 like (Ppp1r13l), mRNA [NM_001010836]	333654	NM_001010836	ENSMUST00000047621
A_55_P2801362,A_55_P2630941|12589	1.4673e-15	6.16545e-17	-1.96539	-1.07325	1.83125	-2.18384	-1.22404	1.78412	Ift81	intraflagellar transport 81	Mus musculus intraflagellar transport 81 (Ift81), mRNA [NM_009879]	12589	NM_009879	ENSMUST00000135956///ENSMUST00000136024
A_51_P155514|19109	1.46732e-15	6.17137e-17	1.69206	1.95179	1.1535	1.72203	2.13033	1.2371	Prl	prolactin	Mus musculus prolactin (Prl), transcript variant 1, mRNA [NM_011164]	19109	NM_011164	ENSMUST00000018061
A_51_P386585,A_55_P2111439|67839	1.48882e-15	6.26774e-17	-1.47816	-1.22142	1.2102	-1.54099	-1.22893	1.25394	Gpsm1	G-protein signalling modulator 1 (AGS3-like, C. elegans)	Mus musculus G-protein signalling modulator 1 (AGS3-like, C. elegans) (Gpsm1), transcript variant 1, mRNA [NM_153410]///Mus musculus G-protein signalling modulator 1 (AGS3-like, C. elegans) (Gpsm1), transcript variant 3, mRNA [NM_001199147]	67839	NM_153410///NM_001199147	ENSMUST00000066889///ENSMUST00000147873
A_55_P2096933,A_55_P2014332|338349	1.48918e-15	6.27515e-17	-2.8387	-1.77484	1.59941	-2.61489	-2.03027	1.28795	Cntln	centlein, centrosomal protein	Mus musculus centlein, centrosomal protein (Cntln), transcript variant 2, mRNA [NM_177385]///Mus musculus centlein, centrosomal protein (Cntln), transcript variant 1, mRNA [NM_175275]	338349	NM_177385///NM_175275	ENSMUST00000102819///ENSMUST00000107190
A_51_P327874|19228	1.48987e-15	6.28396e-17	-3.43598	1.03385	3.55228	-4.12833	-1.06835	3.8642	Pth1r	parathyroid hormone 1 receptor	Mus musculus parathyroid hormone 1 receptor (Pth1r), transcript variant 1, mRNA [NM_011199]	19228	NM_011199	ENSMUST00000006005
A_55_P1961059,A_55_P2126109,A_55_P2721048,A_65_P09094|74112	1.49621e-15	6.31667e-17	1.75944	-1.07998	-1.90016	1.62061	-1.07681	-1.74509	Usp16	ubiquitin specific peptidase 16	Mus musculus ubiquitin specific peptidase 16 (Usp16), mRNA [NM_024258]///ubiquitin specific peptidase 16 [Source:MGI Symbol;Acc:MGI:1921362] [ENSMUST00000144886]///ubiquitin specific peptidase 16 [Source:MGI Symbol;Acc:MGI:1921362] [ENSMUST00000131206]	74112	NM_024258	ENSMUST00000119504///ENSMUST00000026710///ENSMUST00000144886///ENSMUST00000131206
A_51_P153013|24082	1.49952e-15	6.33657e-17	7.29378	1.95891	-3.72338	7.2409	2.28785	-3.16493	Map2k3os	mitogen-activated protein kinase kinase 3, opposite strand	Mus musculus mitogen-activated protein kinase kinase 3, opposite strand (Map2k3os), long non-coding RNA [NR_027800]	24082	NR_027800
A_66_P132232,A_51_P390397|13870	1.50487e-15	6.36518e-17	2.6089	1.40287	-1.85969	2.56384	1.61098	-1.59148	Ercc1	excision repair cross-complementing rodent repair deficiency, complementation group 1	Mus musculus excision repair cross-complementing rodent repair deficiency, complementation group 1 (Ercc1), transcript variant 1, mRNA [NM_007948]	13870	NM_007948	ENSMUST00000176818///ENSMUST00000162197
A_55_P2126662,A_65_P07350|12389	1.52123e-15	6.45042e-17	1.63222	-1.35835	-2.21711	1.80175	-1.31368	-2.36692	Cav1	caveolin 1, caveolae protein	Mus musculus caveolin 1, caveolae protein (Cav1), transcript variant 2, mRNA [NM_001243064]	12389	NM_001243064	ENSMUST00000115456///ENSMUST00000123439
A_55_P2140751	1.52123e-15	6.45248e-17	1.91386	-1.41843	-2.71467	1.92471	-1.45431	-2.79912			actin, gamma, pseudogene 1 [Source:MGI Symbol;Acc:MGI:87907] [ENSMUST00000099636]			ENSMUST00000215888
A_55_P2090996,A_55_P2090995|69072	1.52123e-15	6.44307e-17	1.78843	1.06084	-1.68586	1.76488	1.09931	-1.60544	Ebna1bp2	EBNA1 binding protein 2	Mus musculus EBNA1 binding protein 2 (Ebna1bp2), mRNA [NM_026932]	69072	NM_026932	ENSMUST00000030501
A_55_P2812142,A_51_P447216,A_55_P2943228,A_55_P2718628|114713	1.52298e-15	6.47201e-17	1.98236	1.06777	-1.85654	1.94115	-1.07587	-2.08842	Rasa2	RAS p21 protein activator 2	Mus musculus RAS p21 protein activator 2 (Rasa2), mRNA [NM_053268]///RAS p21 protein activator 2 [Source:MGI Symbol;Acc:MGI:2149960] [ENSMUST00000185435]///RAS p21 protein activator 2 [Source:MGI Symbol;Acc:MGI:2149960] [ENSMUST00000144376]	114713	NM_053268///XM_006510777	ENSMUST00000034984///ENSMUST00000188853///ENSMUST00000185435///ENSMUST00000144376
A_66_P127314,A_55_P2185543|21886	1.52298e-15	6.4679e-17	-2.84551	-1.27202	2.23701	-2.39716	-1.26213	1.8993	Tle2	transducin-like enhancer of split 2	Mus musculus transducin-like enhancer of split 2 (Tle2), transcript variant 2, mRNA [NM_001252401]	21886	NM_001252401	ENSMUST00000153812///ENSMUST00000135211
A_51_P353882|68992	1.52597e-15	6.49076e-17	-2.39975	-1.1582	2.07195	-2.10096	-1.08989	1.92767	Zfp580	zinc finger protein 580	Mus musculus zinc finger protein 580 (Zfp580), mRNA [NM_026900]	68992	NM_026900	ENSMUST00000069324
A_51_P361426|67166	1.53651e-15	6.54171e-17	1.84447	1.25069	-1.47476	1.94487	1.27257	-1.5283	Arl8b	ADP-ribosylation factor-like 8B	Mus musculus ADP-ribosylation factor-like 8B (Arl8b), mRNA [NM_026011]	67166	NM_026011	ENSMUST00000032196
A_55_P2021011,A_55_P2726865,A_66_P120748|78887	1.53826e-15	6.55528e-17	-2.79256	1.44783	4.04315	-2.70262	1.32284	3.57514	Sfi1	Sfi1 homolog, spindle assembly associated (yeast)	Mus musculus Sfi1 homolog, spindle assembly associated (yeast) (Sfi1), mRNA [NM_030207]///Sfi1 homolog, spindle assembly associated (yeast) [Source:MGI Symbol;Acc:MGI:1926137] [ENSMUST00000138126]	78887	NM_030207	ENSMUST00000155763///ENSMUST00000137633///ENSMUST00000138126
A_51_P397673|100102	1.54511e-15	6.59674e-17	1.07107	-2.03749	-2.1823	1.05677	-2.564	-2.70956	Pcsk9	proprotein convertase subtilisin/kexin type 9	Mus musculus proprotein convertase subtilisin/kexin type 9 (Pcsk9), mRNA [NM_153565]	100102	NM_153565	ENSMUST00000049507
A_55_P2319370,A_52_P38559|83435	1.54511e-15	6.59299e-17	1.68845	1.17161	-1.44113	1.67061	1.19258	-1.40084	Plekha3	pleckstrin homology domain-containing, family A (phosphoinositide binding specific) member 3	Mus musculus pleckstrin homology domain-containing, family A (phosphoinositide binding specific) member 3 (Plekha3), mRNA [NM_031256]	83435	NM_031256	ENSMUST00000111920
A_66_P134786,A_55_P2177712|102638515	1.55937e-15	6.66667e-17	-1.92546	-1.00487	1.91612	-1.78357	1.08643	1.93772	LOC102638515	uncharacterized LOC102638515	PREDICTED: Mus musculus uncharacterized LOC102638515 (LOC102638515), mRNA [XM_006500545]	102638515	XM_006500545
A_51_P459108|27356	1.55937e-15	6.67003e-17	-2.12374	-1.14993	1.84685	-2.15503	-1.14634	1.87992	Insl6	insulin-like 6	Mus musculus insulin-like 6 (Insl6), mRNA [NM_013754]	27356	NM_013754	ENSMUST00000052380
A_52_P440881,A_55_P2626075,A_51_P272563,A_52_P4657,A_55_P2486239|231713	1.56216e-15	6.69437e-17	1.79842	1.22808	-1.46442	1.79103	1.1795	-1.51846	Naa25	N(alpha)-acetyltransferase 25, NatB auxiliary subunit	N(alpha)-acetyltransferase 25, NatB auxiliary subunit [Source:MGI Symbol;Acc:MGI:2442563] [ENSMUST00000042163]///N(alpha)-acetyltransferase 25, NatB auxiliary subunit [Source:MGI Symbol;Acc:MGI:2442563] [ENSMUST00000131598]///Mus musculus N(alpha)-acetyltransferase 25, NatB auxiliary subunit (Naa25), mRNA [NM_172722]	231713	XM_011248198///NM_172722	ENSMUST00000042163///ENSMUST00000131598///ENSMUST00000174322///ENSMUST00000151458
A_55_P1971318	1.56216e-15	6.6914e-17	-9.13538	-1.03783	8.80237	-4.89591	-1.32082	3.70672			predicted gene 28533 [Source:MGI Symbol;Acc:MGI:5579239] [ENSMUST00000190106]			ENSMUST00000190106
A_55_P1969481,A_55_P2717942,A_55_P2139019,A_52_P1131985|16656	1.56711e-15	6.72181e-17	2.52827	1.05836	-2.38886	2.54089	1.03921	-2.44502	Hivep3	human immunodeficiency virus type I enhancer binding protein 3	Mus musculus human immunodeficiency virus type I enhancer binding protein 3 (Hivep3), mRNA [NM_010657]///human immunodeficiency virus type I enhancer binding protein 3 [Source:MGI Symbol;Acc:MGI:106589] [ENSMUST00000143837]///human immunodeficiency virus type I enhancer binding protein 3 [Source:MGI Symbol;Acc:MGI:106589] [ENSMUST00000123698]///human immunodeficiency virus type I enhancer binding…	16656	NM_010657///XR_001784097///XM_006502816	ENSMUST00000106307///ENSMUST00000143837///ENSMUST00000123698
A_51_P173100,A_55_P2829448|108705	1.5722e-15	6.74985e-17	2.04438	1.31439	-1.55539	2.21015	1.32199	-1.67184	Pttg1ip	pituitary tumor-transforming 1 interacting protein	Mus musculus pituitary tumor-transforming 1 interacting protein (Pttg1ip), mRNA [NM_145925]	108705	NM_145925	ENSMUST00000009435///ENSMUST00000162598
A_51_P248609|28010	1.57718e-15	6.7775e-17	-3.02319	-1.11799	2.70413	-3.21532	-1.09691	2.93126	Miip	migration and invasion inhibitory protein	Mus musculus migration and invasion inhibitory protein (Miip), mRNA [NM_001025365]	28010	NM_001025365	ENSMUST00000156374
A_55_P2642803,A_55_P2454004|66291	1.58293e-15	6.80849e-17	-2.06002	-1.24233	1.65819	-2.02336	-1.27151	1.5913	Smim8	small integral membrane protein 8	Mus musculus small integral membrane protein 8 (Smim8), transcript variant 1, mRNA [NM_025471]	66291	NM_025471	ENSMUST00000131295///ENSMUST00000139922
A_55_P2060183,A_55_P2095909|56692	1.58603e-15	6.82813e-17	1.81372	1.02166	-1.77527	1.81412	-1.01726	-1.84543	Lamtor3	late endosomal/lysosomal adaptor, MAPK and MTOR activator 3	Mus musculus late endosomal/lysosomal adaptor, MAPK and MTOR activator 3 (Lamtor3), mRNA [NM_019920]	56692	NM_019920	ENSMUST00000168345///ENSMUST00000179862
A_55_P2060402,A_51_P170758|101612	1.61028e-15	6.94532e-17	2.62973	1.05772	-2.48622	2.77627	1.34618	-2.06234	Grwd1	glutamate-rich WD repeat containing 1	Mus musculus glutamate-rich WD repeat containing 1 (Grwd1), mRNA [NM_153419]	101612	NM_153419	ENSMUST00000107723///ENSMUST00000209484
A_52_P297803,A_51_P146701|18194	1.61028e-15	6.94521e-17	-1.14679	-1.93837	-1.69026	-1.17495	-2.31224	-1.96795	Nsdhl	NAD(P) dependent steroid dehydrogenase-like	Mus musculus NAD(P) dependent steroid dehydrogenase-like (Nsdhl), mRNA [NM_010941]///Mus musculus cDNA clone IMAGE:5320965, **** WARNING: chimeric clone **** [BC025545]	18194	NM_010941	ENSMUST00000033715
A_51_P335710,A_51_P335716,A_52_P24986|102247	1.61056e-15	6.95293e-17	1.72387	1.11926	-1.54018	1.71786	1.20621	-1.42418	Gpat4	glycerol-3-phosphate acyltransferase 4	Mus musculus glycerol-3-phosphate acyltransferase 4 (Gpat4), mRNA [NM_018743]	102247	NM_018743	ENSMUST00000209507///ENSMUST00000210992///ENSMUST00000167004
A_52_P696044,A_55_P2013058,A_55_P2109702,A_55_P2109701|230126	1.62785e-15	7.03403e-17	2.15039	-1.06086	-2.28127	2.08943	-1.03886	-2.17063	Shb	src homology 2 domain-containing transforming protein B	Mus musculus src homology 2 domain-containing transforming protein B (Shb), mRNA [NM_001033306]	230126	NM_001033306	ENSMUST00000130107///ENSMUST00000061986///ENSMUST00000147448
A_52_P165521,A_51_P419141,A_55_P2742665|60534	1.62879e-15	7.04458e-17	-3.21056	1.06874	3.43126	-3.23932	1.14777	3.71798	Fancg	Fanconi anemia, complementation group G	Mus musculus Fanconi anemia, complementation group G (Fancg), transcript variant 1, mRNA [NM_053081]	60534	NM_053081	ENSMUST00000127067///ENSMUST00000125570///ENSMUST00000123332
A_51_P290207|231070	1.63347e-15	7.07129e-17	-1.2083	-1.93466	-1.60114	-1.26347	-2.26496	-1.79265	Insig1	insulin induced gene 1	Mus musculus insulin induced gene 1 (Insig1), mRNA [NM_153526]	231070	NM_153526	ENSMUST00000059155
A_30_P01021891	1.64857e-15	7.14322e-17	2.06073	2.16817	1.05214	1.72678	1.77904	1.03026			lincRNA:chr4:129380903-129390686 reverse strand
A_51_P432484,A_55_P2004137|14678	1.65966e-15	7.19784e-17	-1.60377	-1.22432	1.30993	-1.62306	-1.28744	1.26068	Gnai2	guanine nucleotide binding protein (G protein), alpha inhibiting 2	Mus musculus guanine nucleotide binding protein (G protein), alpha inhibiting 2 (Gnai2), mRNA [NM_008138]	14678	NM_008138	ENSMUST00000193538///ENSMUST00000055704
A_51_P293688|67844	1.68704e-15	7.32332e-17	1.74798	-1.13348	-1.9813	1.68672	-1.20844	-2.0383	Rab32	RAB32, member RAS oncogene family	Mus musculus RAB32, member RAS oncogene family (Rab32), mRNA [NM_026405]	67844	NM_026405	ENSMUST00000019974
A_51_P170903,A_55_P2019699,A_52_P466090,A_55_P2164492|56045	1.69332e-15	7.36213e-17	-1.91214	-1.32261	1.44573	-1.96577	-1.32079	1.48833	Samhd1	SAM domain and HD domain, 1	Mus musculus SAM domain and HD domain, 1 (Samhd1), transcript variant 1, mRNA [NM_018851]///Mus musculus SAM domain and HD domain, 1 (Samhd1), transcript variant 2, mRNA [NM_001139520]///SAM domain and HD domain, 1 [Source:MGI Symbol;Acc:MGI:1927468] [ENSMUST00000149313]	56045	NM_018851///NM_001139520///XM_006499921	ENSMUST00000142508///ENSMUST00000160213///ENSMUST00000149313
A_55_P1953241|17135	1.69332e-15	7.364e-17	1.71135	-1.3453	-2.30229	1.83148	-1.41959	-2.59995	Mafk	v-maf musculoaponeurotic fibrosarcoma oncogene family, protein K (avian)	Mus musculus v-maf musculoaponeurotic fibrosarcoma oncogene family, protein K (avian) (Mafk), mRNA [NM_010757]	17135	NM_010757	ENSMUST00000110836
A_52_P647069,A_55_P2106489|237615	1.69536e-15	7.37962e-17	3.45406	1.62091	-2.13093	3.55297	1.75722	-2.02192	Ankrd52	ankyrin repeat domain 52	ankyrin repeat domain 52 [Source:MGI Symbol;Acc:MGI:2444029] [ENSMUST00000167990]///Mus musculus ankyrin repeat domain 52 (Ankrd52), mRNA [NM_172790]	237615	NM_172790	ENSMUST00000167990///ENSMUST00000014642
A_55_P2720073,A_55_P2092909|56289	1.7213e-15	7.49935e-17	1.95845	-1.08951	-2.13374	2.15952	-1.02478	-2.21303	Rassf1	Ras association (RalGDS/AF-6) domain family member 1	Ras association (RalGDS/AF-6) domain family member 1 [Source:MGI Symbol;Acc:MGI:1928386] [ENSMUST00000129320]///Mus musculus Ras association (RalGDS/AF-6) domain family member 1 (Rassf1), transcript variant 1, mRNA [NM_001243748]	56289	NM_001243748	ENSMUST00000129320///ENSMUST00000122225
A_52_P179729,A_55_P2798981|27366	1.72656e-15	7.52913e-17	1.55437	1.05279	-1.47642	1.59856	1.14854	-1.39183	Txnl4a	thioredoxin-like 4A	Mus musculus thioredoxin-like 4A (Txnl4a), transcript variant 1, mRNA [NM_025299]///Mus musculus thioredoxin-like 4A (Txnl4a), transcript variant 2, mRNA [NM_178604]	27366	NM_025299///NM_178604	ENSMUST00000130675///ENSMUST00000025463
A_51_P237695|14679	1.73119e-15	7.5562e-17	1.58736	1.06141	-1.49552	1.64066	1.05367	-1.55709	Gnai3	guanine nucleotide binding protein (G protein), alpha inhibiting 3	Mus musculus guanine nucleotide binding protein (G protein), alpha inhibiting 3 (Gnai3), mRNA [NM_010306]	14679	NM_010306	ENSMUST00000000001
A_51_P279623,A_66_P122920|67278	1.73827e-15	7.594e-17	-1.74627	1.04173	1.81914	-1.97413	1.04785	2.06858	Pagr1a	PAXIP1 associated glutamate rich protein 1A	Mus musculus PAXIP1 associated glutamate rich protein 1A (Pagr1a), mRNA [NM_030240]	67278	NM_030240	ENSMUST00000032918///ENSMUST00000202624
A_51_P155361|15288	1.77407e-15	7.75748e-17	-1.61945	-1.05123	1.54053	-1.72057	1.01861	1.75259	Hmbs	hydroxymethylbilane synthase	Mus musculus hydroxymethylbilane synthase (Hmbs), transcript variant 1, mRNA [NM_013551]	15288	NM_013551	ENSMUST00000216658
A_55_P2341468,A_55_P2045521,A_52_P534250|207181	1.78355e-15	7.80601e-17	-2.88385	-1.34581	2.14283	-2.60076	-1.55046	1.67741	Rbms3	RNA binding motif, single stranded interacting protein	Mus musculus RNA binding motif, single stranded interacting protein (Rbms3), transcript variant 1, mRNA [NM_001172123]///Mus musculus RNA binding motif, single stranded interacting protein (Rbms3), transcript variant 6, mRNA [NM_001172126]///Mus musculus RNA binding motif, single stranded interacting protein (Rbms3), transcript variant 3, mRNA [NM_178660]	207181	NM_001172123///NM_001172126///NM_178660	ENSMUST00000111773///ENSMUST00000069095///ENSMUST00000173429
A_55_P2139611,A_55_P2739647,A_51_P292757|67131	1.78661e-15	7.83357e-17	-2.21269	-1.13585	1.94805	-2.2446	-1.12502	1.99516	Acbd4	acyl-Coenzyme A binding domain containing 4	Mus musculus acyl-Coenzyme A binding domain containing 4 (Acbd4), transcript variant 1, mRNA [NM_025988]	67131	NM_025988	ENSMUST00000161013///ENSMUST00000130749///ENSMUST00000107040
A_55_P2805510|14451	1.78661e-15	7.82817e-17	-2.25045	-1.33904	1.68064	-2.14901	-1.41149	1.52251	Gas1	growth arrest specific 1	Mus musculus growth arrest specific 1 (Gas1), mRNA [NM_008086]	14451	NM_008086	ENSMUST00000065086
A_55_P2911067|68659	1.79505e-15	7.87772e-17	-2.10053	1.24658	2.61847	-2.01646	1.15277	2.32451	Fam198b	family with sequence similarity 198, member B	Mus musculus family with sequence similarity 198, member B (Fam198b), mRNA [NM_133187]	68659	NM_133187	ENSMUST00000029567
A_51_P116137,A_55_P2744324|16206	1.80604e-15	7.93314e-17	2.27322	1.5316	-1.48421	2.29576	1.41532	-1.62207	Lrig1	leucine-rich repeats and immunoglobulin-like domains 1	Mus musculus leucine-rich repeats and immunoglobulin-like domains 1 (Lrig1), mRNA [NM_008377]	16206	NM_008377	ENSMUST00000203876///ENSMUST00000032105
A_52_P655842,A_55_P2063785,A_52_P562817,A_55_P2721837|11733	1.83168e-15	8.05302e-17	1.80801	1.29403	-1.3972	1.78415	1.28868	-1.38448	Ank1	ankyrin 1, erythroid	Mus musculus ankyrin 1, erythroid (Ank1), transcript variant 2, mRNA [NM_031158]///Mus musculus ankyrin 1, erythroid (Ank1), transcript variant 1, mRNA [NM_001110783]///ankyrin 1, erythroid [Source:MGI Symbol;Acc:MGI:88024] [ENSMUST00000135206]	11733	NM_031158///NM_001110783	ENSMUST00000117270///ENSMUST00000033947///ENSMUST00000121075///ENSMUST00000135206
A_51_P244586,A_51_P248335|72701	1.84942e-15	8.13838e-17	-3.14622	-1.33554	2.35577	-3.38025	-1.46367	2.30944	Zfp618	zinc finger protein 618	Mus musculus zinc finger protein 618 (Zfp618), mRNA [NM_028326]///zinc finger protein 618 [Source:MGI Symbol;Acc:MGI:1919950] [ENSMUST00000030043]	72701	NM_028326	ENSMUST00000064814///ENSMUST00000030043
A_65_P18950|100043332	1.87375e-15	8.25286e-17	2.31729	2.58909	1.11729	2.35085	2.62573	1.11693	Ankrd66	ankyrin repeat domain 66	Mus musculus ankyrin repeat domain 66 (Ankrd66), mRNA [NM_001254953]	100043332	NM_001254953	ENSMUST00000178772
A_65_P15731,A_55_P2163009,A_51_P201327|17165	1.89423e-15	8.35813e-17	1.50795	1.11026	-1.35819	1.52088	1.15488	-1.31691	Mapkapk5	MAP kinase-activated protein kinase 5	MAP kinase-activated protein kinase 5 [Source:MGI Symbol;Acc:MGI:1333110] [ENSMUST00000151352]///Mus musculus MAP kinase-activated protein kinase 5 (Mapkapk5), mRNA [NM_010765]	17165	NM_010765	ENSMUST00000151352///ENSMUST00000111786///ENSMUST00000154628
A_51_P138189,A_55_P2061319|107885	1.89423e-15	8.35199e-17	-2.32674	-1.04957	2.21685	-2.40934	-1.09141	2.20755	Mthfs	5, 10-methenyltetrahydrofolate synthetase	Mus musculus 5, 10-methenyltetrahydrofolate synthetase (Mthfs), mRNA [NM_026829]	107885	NM_026829	ENSMUST00000117314///ENSMUST00000138109
A_51_P477738,A_52_P432919|19340	1.89847e-15	8.38436e-17	-2.98958	-1.5934	1.87623	-2.96017	-1.76522	1.67695	Rab3d	RAB3D, member RAS oncogene family	Mus musculus RAB3D, member RAS oncogene family (Rab3d), transcript variant 1, mRNA [NM_031874]	19340	NM_031874	ENSMUST00000128442///ENSMUST00000122211
A_51_P204080|15277	1.92007e-15	8.48736e-17	3.27317	1.60824	-2.03525	3.29376	1.28083	-2.57157	Hk2	hexokinase 2	Mus musculus hexokinase 2 (Hk2), mRNA [NM_013820]	15277	NM_013820	ENSMUST00000168725
A_55_P2742401,A_55_P2003753|230863	1.92445e-15	8.51436e-17	3.98508	1.49634	-2.66322	4.20908	1.46913	-2.86501	Sh2d5	SH2 domain containing 5	Mus musculus SH2 domain containing 5 (Sh2d5), mRNA [NM_001099631]	230863	NM_001099631	ENSMUST00000105823
A_52_P202029|70827	1.92892e-15	8.54182e-17	2.60516	1.18737	-2.19406	2.35783	1.00899	-2.33681	Trak2	trafficking protein, kinesin binding 2	Mus musculus trafficking protein, kinesin binding 2 (Trak2), mRNA [NM_172406]	70827	NM_172406	ENSMUST00000027186
A_51_P115471|239552	1.93258e-15	8.56569e-17	-4.20735	-45.6877	-10.859	-4.62965	-52.9392	-11.4348	Apol8	apolipoprotein L 8	apolipoprotein L 8 [Source:MGI Symbol;Acc:MGI:2444921] [ENSMUST00000089450]	239552	XM_006520935	ENSMUST00000089450
A_51_P430620,A_55_P2731241,A_66_P135234,A_66_P134400,A_52_P1196751|78830	1.95614e-15	8.67792e-17	-1.6468	-1.09527	1.50355	-1.7958	-1.03359	1.73745	Slc25a12	solute carrier family 25 (mitochondrial carrier, Aralar), member 12	Mus musculus solute carrier family 25 (mitochondrial carrier, Aralar), member 12 (Slc25a12), mRNA [NM_172436]///solute carrier family 25 (mitochondrial carrier, Aralar), member 12 [Source:MGI Symbol;Acc:MGI:1926080] [ENSMUST00000151937]///Q8SXQ1_DROME (Q8SXQ1) GH05218p (CG9629-PA), partial (4%) [TC1601831]	78830	NM_172436	ENSMUST00000184169///ENSMUST00000151937///ENSMUST00000137916///ENSMUST00000147553
A_52_P21659,A_55_P2822590|74551	1.95673e-15	8.68829e-17	-2.45009	-1.46165	1.67625	-2.33704	-1.48031	1.57875	Pck2	phosphoenolpyruvate carboxykinase 2 (mitochondrial)	Mus musculus phosphoenolpyruvate carboxykinase 2 (mitochondrial) (Pck2), mRNA [NM_028994]	74551	NM_028994	ENSMUST00000048781
A_55_P2742236,A_52_P376290|216238	1.97186e-15	8.76329e-17	1.96415	-1.07814	-2.11764	1.8844	-1.19224	-2.24666	Eea1	early endosome antigen 1	Mus musculus early endosome antigen 1 (Eea1), mRNA [NM_001001932]	216238	NM_001001932	ENSMUST00000218088///ENSMUST00000218517
A_51_P118237|20393	1.98105e-15	8.812e-17	-1.63196	-2.87379	-1.76094	-1.56575	-3.51426	-2.24446	Sgk1	serum/glucocorticoid regulated kinase 1	Mus musculus serum/glucocorticoid regulated kinase 1 (Sgk1), transcript variant 6, mRNA [NM_011361]	20393	NM_011361	ENSMUST00000092673
A_51_P186053,A_52_P571698|67223	1.98511e-15	8.83794e-17	2.29397	1.15099	-1.99304	2.48899	1.28481	-1.93724	Rrp15	ribosomal RNA processing 15 homolog (S. cerevisiae)	Mus musculus ribosomal RNA processing 15 homolog (S. cerevisiae) (Rrp15), mRNA [NM_026041]///ribosomal RNA processing 15 homolog (S. cerevisiae) [Source:MGI Symbol;Acc:MGI:1914473] [ENSMUST00000162336]	67223	NM_026041	ENSMUST00000162336
A_66_P133343,A_55_P2084303,A_51_P339943|18073	2.01108e-15	8.96157e-17	2.05429	1.41849	-1.44822	2.06227	1.36323	-1.51279	Nid1	nidogen 1	nidogen 1 [Source:MGI Symbol;Acc:MGI:97342] [ENSMUST00000222142]///Mus musculus nidogen 1 (Nid1), mRNA [NM_010917]	18073	NM_010917	ENSMUST00000222142///ENSMUST00000005532
A_52_P673863,A_55_P2026562|12576	2.01196e-15	8.97348e-17	-1.91425	-1.09464	1.74874	-2.13308	-1.13836	1.87381	Cdkn1b	cyclin-dependent kinase inhibitor 1B	cyclin-dependent kinase inhibitor 1B [Source:MGI Symbol;Acc:MGI:104565] [ENSMUST00000067327]///Mus musculus cyclin-dependent kinase inhibitor 1B (Cdkn1b), mRNA [NM_009875]	12576	NM_009875	ENSMUST00000067327
A_55_P1985623|76408	2.01492e-15	8.99467e-17	-4.68081	-1.16212	4.0278	-4.34629	-1.21852	3.56686	Abcc3	ATP-binding cassette, sub-family C (CFTR/MRP), member 3	Mus musculus ATP-binding cassette, sub-family C (CFTR/MRP), member 3 (Abcc3), mRNA [NM_029600]	76408	NM_029600	ENSMUST00000021231
A_52_P607674,A_55_P2129437|50784	2.01847e-15	9.01853e-17	1.86298	1.1904	-1.565	1.8562	1.29928	-1.42864	Plpp2	phospholipid phosphatase 2	Mus musculus phospholipid phosphatase 2 (Plpp2), transcript variant 1, mRNA [NM_015817]	50784	NM_015817	ENSMUST00000165233///ENSMUST00000063879
A_51_P296036|223649	2.04641e-15	9.15149e-17	-2.91583	-1.23713	2.35693	-3.1238	-1.54393	2.02328	Nrbp2	nuclear receptor binding protein 2	Mus musculus nuclear receptor binding protein 2 (Nrbp2), mRNA [NM_144847]	223649	NM_144847	ENSMUST00000019516
A_52_P132137,A_55_P2100305|80877	2.06846e-15	9.25832e-17	-2.35886	-1.21048	1.9487	-2.20726	-1.35208	1.63249	Lrba	LPS-responsive beige-like anchor	Mus musculus LPS-responsive beige-like anchor (Lrba), transcript variant 3, mRNA [NM_001077687]///Mus musculus LPS-responsive beige-like anchor (Lrba), transcript variant 1, mRNA [NM_030695]	80877	NM_001077687///NM_030695	ENSMUST00000212390///ENSMUST00000107635
A_55_P2124385,A_55_P2089223|11639	2.11644e-15	9.48148e-17	4.68434	1.75537	-2.66857	4.51954	1.53501	-2.9443	Ak4	adenylate kinase 4	Mus musculus adenylate kinase 4 (Ak4), transcript variant 1, mRNA [NM_001177602]	11639	NM_001177602	ENSMUST00000120282///ENSMUST00000106946
A_55_P2742256,A_55_P2805234,A_55_P2742770|71978	2.12982e-15	9.55656e-17	1.56661	1.06299	-1.47377	1.58024	1.09228	-1.44673	Ppp2r2a	protein phosphatase 2, regulatory subunit B, alpha	Mus musculus protein phosphatase 2, regulatory subunit B, alpha (Ppp2r2a), transcript variant 1, mRNA [NM_028032]///Mus musculus protein phosphatase 2, regulatory subunit B, alpha (Ppp2r2a), transcript variant 2, mRNA [NM_001205188]///Q571J7_MOUSE (Q571J7) MKIAA4213 protein (Fragment), partial (64%) [TC1650142]	71978	NM_028032///NM_001205188	ENSMUST00000089230
A_55_P2807418|19734	2.12982e-15	9.55835e-17	1.84581	-1.5724	-2.90235	1.86848	-1.96529	-3.67211	Rgs16	regulator of G-protein signaling 16	Mus musculus regulator of G-protein signaling 16 (Rgs16), mRNA [NM_011267]	19734	NM_011267	ENSMUST00000027748
A_55_P2125564|320184	2.13935e-15	9.6096e-17	2.19665	1.49177	-1.47252	2.28965	1.32863	-1.72332	Lrrc58	leucine rich repeat containing 58	Mus musculus leucine rich repeat containing 58 (Lrrc58), mRNA [NM_177093]	320184	NM_177093	ENSMUST00000078717
A_55_P2171406,A_52_P35064|73166	2.14662e-15	9.65081e-17	-1.57836	-2.46348	-1.56079	-1.58029	-2.90145	-1.83603	Tm7sf2	transmembrane 7 superfamily member 2	Mus musculus transmembrane 7 superfamily member 2 (Tm7sf2), mRNA [NM_028454]	73166	NM_028454	ENSMUST00000161718///ENSMUST00000113543
A_55_P2091736|215653	2.15028e-15	9.67578e-17	-3.27463	-1.43647	2.27964	-3.15921	-1.57829	2.00167	Rassf2	Ras association (RalGDS/AF-6) domain family member 2	Mus musculus Ras association (RalGDS/AF-6) domain family member 2 (Rassf2), mRNA [NM_175445]	215653	NM_175445	ENSMUST00000103182
A_51_P150964|18596	2.15275e-15	9.69545e-17	-3.41601	-1.21722	2.8064	-3.27877	-1.49277	2.19643	Pdgfrb	platelet derived growth factor receptor, beta polypeptide	Mus musculus platelet derived growth factor receptor, beta polypeptide (Pdgfrb), transcript variant 2, mRNA [NM_008809]	18596	NM_008809	ENSMUST00000115274
A_51_P220222,A_55_P2004801|21335	2.15992e-15	9.73632e-17	-1.5391	-1.14501	1.34418	-1.56654	-1.05346	1.48705	Tacc3	transforming, acidic coiled-coil containing protein 3	Mus musculus transforming, acidic coiled-coil containing protein 3 (Tacc3), transcript variant 1, mRNA [NM_001310541]	21335	NM_001310541	ENSMUST00000138240///ENSMUST00000114426
A_51_P262171,A_55_P1981479,A_55_P2498142|15944	2.17123e-15	9.79591e-17	-1.53143	1.05115	1.60977	-1.55963	-1.05277	1.48145	Irgm1	immunity-related GTPase family M member 1	Mus musculus immunity-related GTPase family M member 1 (Irgm1), mRNA [NM_008326]	15944	NM_008326	ENSMUST00000097271
A_52_P484838|19727	2.2031e-15	9.94848e-17	-3.0336	-1.23393	2.45848	-3.05303	-1.23545	2.47118	Rfxank	regulatory factor X-associated ankyrin-containing protein	Mus musculus regulatory factor X-associated ankyrin-containing protein (Rfxank), transcript variant 1, mRNA [NM_011266]	19727	NM_011266	ENSMUST00000212472
A_52_P302496|14085	2.25439e-15	1.0189e-16	-1.95161	-1.2888	1.51429	-1.83346	-1.2611	1.45386	Fah	fumarylacetoacetate hydrolase	Mus musculus fumarylacetoacetate hydrolase (Fah), mRNA [NM_010176]	14085	NM_010176	ENSMUST00000032865
A_55_P2122555,A_55_P2501349,A_55_P2122546|27373	2.25877e-15	1.02178e-16	1.65855	1.10337	-1.50316	1.71507	1.12593	-1.52324	Csnk1e	casein kinase 1, epsilon	Mus musculus casein kinase 1, epsilon (Csnk1e), transcript variant 3, mRNA [NM_001289899]///Mus musculus casein kinase 1, epsilon (Csnk1e), transcript variant 1, mRNA [NM_013767]	27373	NM_001289899///NM_013767	ENSMUST00000120859///ENSMUST00000122044///ENSMUST00000117786
A_55_P2729418,A_55_P2731586,A_51_P407248|69538	2.26153e-15	1.02478e-16	-1.6467	1.09923	1.8101	-1.55715	1.03918	1.61817	Antxr1	anthrax toxin receptor 1	anthrax toxin receptor 1 [Source:MGI Symbol;Acc:MGI:1916788] [ENSMUST00000205033]///anthrax toxin receptor 1 [Source:MGI Symbol;Acc:MGI:1916788] [ENSMUST00000203563]///Mus musculus anthrax toxin receptor 1 (Antxr1), mRNA [NM_054041]	69538	NM_054041	ENSMUST00000205033///ENSMUST00000203563///ENSMUST00000203131
A_51_P317176|12985	2.26153e-15	1.02482e-16	5.12	-1.76684	-9.0462	4.35094	-2.40902	-10.4815	Csf3	colony stimulating factor 3 (granulocyte)	Mus musculus colony stimulating factor 3 (granulocyte) (Csf3), mRNA [NM_009971]	12985	NM_009971	ENSMUST00000038886
A_55_P2118674,A_55_P2926755|57783	2.26484e-15	1.02813e-16	-1.70736	-1.31724	1.29617	-1.75842	-1.3412	1.31108	Tnip1	TNFAIP3 interacting protein 1	Mus musculus TNFAIP3 interacting protein 1 (Tnip1), transcript variant 2, mRNA [NM_001199275]///Mus musculus TNFAIP3 interacting protein 1 (Tnip1), transcript variant 5, mRNA [NM_001271456]	57783	NM_001199275///NM_001271456	ENSMUST00000102731///ENSMUST00000132776
A_66_P120312,A_51_P108131|75580	2.26484e-15	1.02797e-16	-1.73826	-1.08881	1.59647	-1.8825	-1.16685	1.61331	Zbtb4	zinc finger and BTB domain containing 4	Mus musculus zinc finger and BTB domain containing 4 (Zbtb4), mRNA [NM_029348]	75580	NM_029348	ENSMUST00000108638///ENSMUST00000108642
A_55_P2047673,A_52_P172711,A_52_P30920,A_51_P174422,A_55_P2934668|27364	2.27254e-15	1.03252e-16	-2.1252	-1.5238	1.39467	-2.19403	-1.73947	1.26132	Srr	serine racemase	Mus musculus serine racemase (Srr), transcript variant 1, mRNA [NM_013761]///Q5QLY6_ORYSA (Q5QLY6) Cell wall protein-like, partial (5%) [TC1620201]///PREDICTED: Mus musculus serine racemase (Srr), transcript variant X1, mRNA [XM_017314569]	27364	NM_013761///XM_017314569	ENSMUST00000121738///ENSMUST00000138612///ENSMUST00000108447
A_55_P2740586,A_51_P103718,A_52_P413035|27399	2.28993e-15	1.04133e-16	-1.85231	-1.02299	1.81068	-1.95006	-1.09312	1.78393	Ip6k1	inositol hexaphosphate kinase 1	Mus musculus inositol hexaphosphate kinase 1 (Ip6k1), mRNA [NM_013785]	27399	NM_013785	ENSMUST00000176613///ENSMUST00000035214///ENSMUST00000167159
A_51_P327920,A_66_P101981,A_55_P2719564|229681	2.30259e-15	1.048e-16	1.5048	-1.214	-1.82683	1.39133	-1.35947	-1.89147	St7l	suppression of tumorigenicity 7-like	suppression of tumorigenicity 7-like [Source:MGI Symbol;Acc:MGI:2386964] [ENSMUST00000199186]///Mus musculus suppression of tumorigenicity 7-like (St7l), transcript variant 1, mRNA [NM_153091]///suppression of tumorigenicity 7-like [Source:MGI Symbol;Acc:MGI:2386964] [ENSMUST00000140457]	229681	NM_153091	ENSMUST00000199186///ENSMUST00000106769///ENSMUST00000140457
A_51_P382152|19124	2.32073e-15	1.05718e-16	2.42491	1.53252	-1.5823	2.70484	1.51459	-1.78586	Procr	protein C receptor, endothelial	Mus musculus protein C receptor, endothelial (Procr), mRNA [NM_011171]	19124	NM_011171	ENSMUST00000143493
A_66_P101835|12494	2.3213e-15	1.05836e-16	-3.85026	1.29868	5.00027	-3.42334	-1.01514	3.37228	Cd38	CD38 antigen	Mus musculus CD38 antigen (Cd38), mRNA [NM_007646]	12494	NM_007646	ENSMUST00000030964
A_51_P293069,A_55_P2724139,A_52_P181748|226844	2.33811e-15	1.06788e-16	2.99049	1.4303	-2.09082	3.11099	1.48128	-2.10021	Mfsd7b	major facilitator superfamily domain containing 7B	Mus musculus major facilitator superfamily domain containing 7B (Mfsd7b), transcript variant 1, mRNA [NM_001081259]///PREDICTED: Mus musculus major facilitator superfamily domain containing 7B (Mfsd7b), transcript variant X1, misc_RNA [XR_001784141]///vi22e11.y1 Barstead mouse proximal colon MPLRB6 Mus musculus cDNA clone IMAGE:904556 5'. [AI553243]	226844	NM_001081259///XR_001784141	ENSMUST00000194589
A_55_P2872583,A_51_P229325|69726	2.33811e-15	1.06719e-16	-2.19934	-1.22497	1.79543	-2.15509	-1.42619	1.51108	Smyd3	SET and MYND domain containing 3	BB554267 RIKEN full-length enriched, 2 days pregnant adult female ovary Mus musculus cDNA clone E330012H19 3'. [BB554267]///Mus musculus SET and MYND domain containing 3 (Smyd3), mRNA [NM_027188]	69726	NM_027188	ENSMUST00000129393
A_55_P1990780,A_55_P2040295,A_55_P2809936,A_52_P587378,A_55_P2090633|19243	2.34711e-15	1.07293e-16	3.6167	1.1461	-3.15566	3.72572	1.07185	-3.47598	Ptp4a1	protein tyrosine phosphatase 4a1	Mus musculus protein tyrosine phosphatase 4a1 (Ptp4a1), mRNA [NM_011200]	19243	NM_011200	ENSMUST00000076587///ENSMUST00000153681///ENSMUST00000027232
A_55_P2157038,A_55_P2637722,A_52_P329934|70122	2.35641e-15	1.07813e-16	-2.55544	-1.22793	2.08109	-2.36667	-1.24861	1.89544	Mllt3	myeloid/lymphoid or mixed-lineage leukemia; translocated to, 3	myeloid/lymphoid or mixed-lineage leukemia; translocated to, 3 [Source:MGI Symbol;Acc:MGI:1917372] [ENSMUST00000134555]///Mus musculus myeloid/lymphoid or mixed-lineage leukemia; translocated to, 3 (Mllt3), transcript variant 1, mRNA [NM_027326]	70122	NM_027326	ENSMUST00000134555///ENSMUST00000142454///ENSMUST00000148059
A_51_P376711|100134986	2.35641e-15	1.07905e-16	-2.89528	-1.15696	2.50249	-2.93637	-1.1695	2.51078	Gm15498	predicted gene 15498	Q4SMS2_TETNG (Q4SMS2) Chromosome 8 SCAF14545, whole genome shotgun sequence, partial (16%) [TC1591914]	100134986
A_51_P240614|17112	2.35776e-15	1.0806e-16	2.81148	1.49997	-1.87436	2.99409	1.423	-2.10407	Tm4sf1	transmembrane 4 superfamily member 1	Mus musculus transmembrane 4 superfamily member 1 (Tm4sf1), mRNA [NM_008536]	17112	NM_008536	ENSMUST00000198030
A_55_P2004920,A_52_P445382|72429	2.3591e-15	1.08216e-16	1.91957	-1.10848	-2.1278	1.80688	-1.06035	-1.91592	Dnajc25	DnaJ heat shock protein family (Hsp40) member C25	DnaJ heat shock protein family (Hsp40) member C25 [Source:MGI Symbol;Acc:MGI:1919679] [ENSMUST00000095070]///Mus musculus DnaJ heat shock protein family (Hsp40) member C25 (Dnajc25), mRNA [NM_001033165]	72429	NM_001033165	ENSMUST00000095070///ENSMUST00000148366
A_55_P2935490,A_51_P506755|21745	2.36307e-15	1.08492e-16	-2.18326	-1.14215	1.91153	-2.23174	-1.35651	1.64521	Tep1	telomerase associated protein 1	Q5XKB2_MOUSE (Q5XKB2) Telomerase associated protein 1, partial (3%) [TC1618794]///Mus musculus telomerase associated protein 1 (Tep1), mRNA [NM_009351]	21745	NM_009351	ENSMUST00000006444
A_52_P419162,A_52_P134083,A_55_P1982524|54151	2.39761e-15	1.10173e-16	-1.88006	-1.02526	1.83375	-1.96761	1.00336	1.97422	Cyhr1	cysteine and histidine rich 1	Mus musculus cysteine and histidine rich 1 (Cyhr1), transcript variant 3, mRNA [NM_001276321]///Mus musculus cysteine and histidine rich 1 (Cyhr1), transcript variant 2, mRNA [NM_180962]///Mus musculus cysteine and histidine rich 1 (Cyhr1), transcript variant 1, mRNA [NM_019396]	54151	NM_001276321///NM_180962///NM_019396	ENSMUST00000176274///ENSMUST00000066677///ENSMUST00000081291
A_55_P2069842,A_55_P1993522,A_55_P1993512|320661	2.41192e-15	1.10926e-16	1.69839	1.44177	-1.17799	1.86118	1.47946	-1.25801	D5Ertd579e	DNA segment, Chr 5, ERATO Doi 579, expressed	Mus musculus DNA segment, Chr 5, ERATO Doi 579, expressed (D5Ertd579e), mRNA [NM_001081232]///DNA segment, Chr 5, ERATO Doi 579, expressed [Source:MGI Symbol;Acc:MGI:1261849] [ENSMUST00000140653]	320661	NM_001081232	ENSMUST00000140063///ENSMUST00000031091///ENSMUST00000140653
A_51_P456941|15939	2.41758e-15	1.11282e-16	-1.04153	-1.78378	-1.71266	-1.09063	-2.05084	-1.88042	Ier5	immediate early response 5	Mus musculus immediate early response 5 (Ier5), mRNA [NM_010500]	15939	NM_010500	ENSMUST00000055322
A_55_P2120219,A_51_P269792|19363	2.44535e-15	1.12755e-16	-3.81667	-1.09162	3.49635	-3.66486	-1.39529	2.6266	Rad51b	RAD51 paralog B	Mus musculus RAD51 paralog B (Rad51b), transcript variant 2, mRNA [NM_001252562]///Mus musculus RAD51 paralog B (Rad51b), transcript variant 1, mRNA [NM_009014]	19363	NM_001252562///NM_009014	ENSMUST00000079533///ENSMUST00000218039
A_55_P2752103	2.44535e-15	1.12684e-16	6.11563	11.9939	1.96119	6.09613	10.7099	1.75684			BB189136 RIKEN full-length enriched, adult male spinal cord Mus musculus cDNA clone A330052O03 3'. [BB189136]
A_51_P496245,A_55_P1966508|15425	2.45472e-15	1.13284e-16	-1.4726	1.71065	2.5191	-1.63268	1.55734	2.54263	Hoxc6	homeobox C6	S74185 homeobox protein 3.3 {Mus sp.} (exp=-1; wgp=0; cg=0), complete [TC1585504]///Mus musculus homeobox C6 (Hoxc6), mRNA [NM_010465]	15425	NM_010465	ENSMUST00000001711
A_55_P2927266,A_51_P521001,A_55_P2035981|75007	2.45825e-15	1.13545e-16	-1.6034	-1.32269	1.21223	-1.65759	-1.16627	1.42128	Mindy1	MINDY lysine 48 deubiquitinase 1	Mus musculus family with sequence similarity 63, member A (Fam63a), transcript variant 2, mRNA [NM_133858]///family with sequence similarity 63, member A [Source:MGI Symbol;Acc:MGI:1922257] [ENSMUST00000149568]///Mus musculus family with sequence similarity 63, member A (Fam63a), transcript variant 1, mRNA [NM_199475]	75007	NM_133858///NM_199475	ENSMUST00000135264///ENSMUST00000149568///ENSMUST00000133762
A_55_P2645265,A_51_P446003|27369	2.46901e-15	1.1414e-16	-2.04374	-1.1077	1.84503	-1.96203	-1.07464	1.82576	Dguok	deoxyguanosine kinase	deoxyguanosine kinase [Source:MGI Symbol;Acc:MGI:1351602] [ENSMUST00000147060]///Mus musculus deoxyguanosine kinase (Dguok), transcript variant 1, mRNA [NM_013764]	27369	NM_013764	ENSMUST00000147060///ENSMUST00000145455
A_55_P2145531|246221	2.47151e-15	1.14354e-16	-2.13866	-1.68906	1.26618	-2.12611	-1.84382	1.1531	Mpst	mercaptopyruvate sulfurtransferase	Mus musculus mercaptopyruvate sulfurtransferase (Mpst), transcript variant 1, mRNA [NM_138670]	246221	NM_138670	ENSMUST00000043865
A_55_P2138306	2.47637e-15	1.14677e-16	2.12236	-1.39168	-2.95365	2.0831	-1.46376	-3.04916			predicted gene 5388 [Source:MGI Symbol;Acc:MGI:3647395] [ENSMUST00000120059]			ENSMUST00000120059
A_55_P2053258|70235	2.47857e-15	1.14877e-16	-2.30091	-1.26003	1.82608	-2.36124	-1.15193	2.04982	Poc1a	POC1 centriolar protein A	Mus musculus POC1 centriolar protein A (Poc1a), mRNA [NM_027354]	70235	NM_027354	ENSMUST00000216228
A_52_P672453|70767	2.51081e-15	1.16471e-16	1.85338	1.1296	-1.64073	1.97384	1.2462	-1.58389	Prpf3	pre-mRNA processing factor 3	Mus musculus pre-mRNA processing factor 3 (Prpf3), transcript variant 1, mRNA [NM_027541]	70767	NM_027541	ENSMUST00000161476
A_51_P165914,A_55_P2713830|228491	2.51575e-15	1.168e-16	2.26497	1.73758	-1.30352	2.4699	1.66105	-1.48695	Zfp770	zinc finger protein 770	Mus musculus zinc finger protein 770 (Zfp770), mRNA [NM_175466]///zinc finger protein 770 [Source:MGI Symbol;Acc:MGI:2445100] [ENSMUST00000123562]	228491	NM_175466	ENSMUST00000050668///ENSMUST00000123562
A_55_P2718015,A_66_P111089,A_55_P1984640|67921	2.54854e-15	1.18424e-16	1.94317	1.0281	-1.89005	1.9317	1.09319	-1.76703	Ube2f	ubiquitin-conjugating enzyme E2F (putative)	ubiquitin-conjugating enzyme E2F (putative) [Source:MGI Symbol;Acc:MGI:1915171] [ENSMUST00000191533]///Mus musculus ubiquitin-conjugating enzyme E2F (putative) (Ube2f), mRNA [NM_026454]	67921	XM_006529838///NM_026454	ENSMUST00000191533///ENSMUST00000080066///ENSMUST00000171112
A_55_P2720213,A_66_P117930|19368	2.5641e-15	1.19249e-16	2.19116	1.15916	-1.8903	2.12022	1.14504	-1.85166	Raet1a	retinoic acid early transcript 1, alpha	Mus musculus retinoic acid early transcript 1, alpha (Raet1a), mRNA [NM_009016]	19368	NM_009016	ENSMUST00000182677///ENSMUST00000180648
A_66_P129538,A_55_P2111855|74246	2.57943e-15	1.20064e-16	-1.81082	-1.27032	1.42549	-1.96969	-1.19854	1.6434	Gale	galactose-4-epimerase, UDP	Mus musculus galactose-4-epimerase, UDP (Gale), mRNA [NM_178389]	74246	NM_178389	ENSMUST00000150430///ENSMUST00000102540
A_51_P451346|23849	2.59141e-15	1.20828e-16	-1.15394	-1.98515	-1.72032	-1.08445	-2.01613	-1.85913	Klf6	Kruppel-like factor 6	Mus musculus Kruppel-like factor 6 (Klf6), mRNA [NM_011803]	23849	NM_011803	ENSMUST00000000080
A_55_P2151138|100040531	2.59141e-15	1.20733e-16	-2.09464	-1.07093	1.95591	-1.97745	-1.02393	1.93123	Dynlt1f	dynein light chain Tctex-type 1F	Mus musculus dynein light chain Tctex-type 1F (Dynlt1f), transcript variant 2, mRNA [NM_001199948]	100040531	NM_001199948	ENSMUST00000117045
A_52_P79639|26949	2.6021e-15	1.21437e-16	2.16689	1.48675	-1.45747	2.05443	1.49068	-1.37819	Vat1	vesicle amine transport 1	Mus musculus vesicle amine transport 1 (Vat1), mRNA [NM_012037]	26949	NM_012037	ENSMUST00000040430
A_65_P19422|100503380	2.6021e-15	1.21533e-16	7.19058	4.0497	-1.77558	7.39839	3.74653	-1.97473	Snhg4	small nucleolar RNA host gene 4	Mus musculus small nucleolar RNA host gene 4 (Snhg4), long non-coding RNA [NR_038073]	100503380	NR_038073
A_55_P2104597,A_55_P2733377|105440	2.62337e-15	1.2263e-16	2.02276	1.05629	-1.91497	2.26165	1.16409	-1.94284	Kctd9	potassium channel tetramerisation domain containing 9	Mus musculus potassium channel tetramerisation domain containing 9 (Kctd9), transcript variant 3, mRNA [NM_001285933]///potassium channel tetramerisation domain containing 9 [Source:MGI Symbol;Acc:MGI:2145579] [ENSMUST00000152243]	105440	NM_001285933	ENSMUST00000156700///ENSMUST00000152243
A_55_P2244112|75723	2.63186e-15	1.23132e-16	3.31956	1.43883	-2.30712	3.54184	1.73423	-2.04231	Amotl1	angiomotin-like 1	Mus musculus angiomotin-like 1 (Amotl1), mRNA [NM_001081395]	75723	NM_001081395	ENSMUST00000160770
A_52_P660158,A_55_P2327027|105722	2.63633e-15	1.23445e-16	1.91311	-1.07569	-2.05792	1.81399	-1.17904	-2.13877	Ano6	anoctamin 6	Mus musculus anoctamin 6 (Ano6), transcript variant 2, mRNA [NM_175344]///Mus musculus anoctamin 6 (Ano6), transcript variant 1, mRNA [NM_001253813]	105722	NM_175344///NM_001253813	ENSMUST00000071874
A_55_P2722213,A_55_P2040907,A_55_P2073467,A_52_P442585|14886	2.63669e-15	1.23567e-16	-1.9184	-1.16053	1.65304	-2.1066	-1.20887	1.74263	Gtf2i	general transcription factor II I	general transcription factor II I [Source:MGI Symbol;Acc:MGI:1202722] [ENSMUST00000173509]///Mus musculus general transcription factor II I (Gtf2i), transcript variant 1, mRNA [NM_001080746]///Mus musculus general transcription factor II I (Gtf2i), transcript variant 2, mRNA [NM_010365]	14886	NM_001080746///NM_010365	ENSMUST00000173509///ENSMUST00000173887///ENSMUST00000059042///ENSMUST00000173888
A_55_P2154430,A_51_P337510|54219	2.64388e-15	1.24009e-16	-1.57586	-1.06204	1.48381	-1.6153	1.07322	1.73357	Cd320	CD320 antigen	Mus musculus CD320 antigen (Cd320), transcript variant 2, mRNA [NM_001305169]///Mus musculus CD320 antigen (Cd320), transcript variant 1, mRNA [NM_019421]	54219	NM_001305169///NM_019421	ENSMUST00000002379///ENSMUST00000087559
A_55_P2715663,A_55_P2728282,A_55_P1997375,A_51_P286146,A_52_P575217|107589	2.65847e-15	1.24835e-16	-3.26248	-1.30131	2.50706	-3.41695	-1.41223	2.41954	Mylk	myosin, light polypeptide kinase	myosin, light polypeptide kinase [Source:MGI Symbol;Acc:MGI:894806] [ENSMUST00000155268]///Mus musculus myosin, light polypeptide kinase (Mylk), mRNA [NM_139300]///Q8BJ10_MOUSE (Q8BJ10) Adult retina cDNA, RIKEN full-length enriched library, clone:A930019C19 product:MYOSIN LIGHT CHAIN KINASE homolog, complete [TC1591840]	107589	NM_139300	ENSMUST00000155268///ENSMUST00000023538
A_55_P1966774,A_55_P2142232|628900	2.65847e-15	1.24904e-16	-6.06689	-1.81897	3.33534	-5.25074	-2.2627	2.32056	Serpina3i	serine (or cysteine) peptidase inhibitor, clade A, member 3I	Mus musculus serine (or cysteine) peptidase inhibitor, clade A, member 3I (Serpina3i), mRNA [NM_001199940]	628900	NM_001199940	ENSMUST00000109958
A_55_P2132517,A_55_P2934428,A_66_P136781|69080	2.66677e-15	1.255e-16	-1.89761	-1.21551	1.56117	-2.04448	-1.19553	1.7101	Gmppa	GDP-mannose pyrophosphorylase A	Mus musculus GDP-mannose pyrophosphorylase A (Gmppa), mRNA [NM_133708]///GDP-mannose pyrophosphorylase A [Source:MGI Symbol;Acc:MGI:1916330] [ENSMUST00000140287]	69080	NM_133708///XM_006496538	ENSMUST00000113584///ENSMUST00000140287
A_51_P416919,A_66_P111437|140499	2.66677e-15	1.25506e-16	1.72967	1.08326	-1.59673	1.72867	1.20122	-1.43909	Ube2j2	ubiquitin-conjugating enzyme E2J 2	Mus musculus ubiquitin-conjugating enzyme E2J 2 (Ube2j2), transcript variant 1, mRNA [NM_021402]	140499	NM_021402	ENSMUST00000152536///ENSMUST00000105583
A_55_P2052563|15901	2.6733e-15	1.2592e-16	-2.34011	-1.69504	1.38056	-2.25876	-1.69776	1.33044	Id1	inhibitor of DNA binding 1	Mus musculus inhibitor of DNA binding 1 (Id1), mRNA [NM_010495]	15901	NM_010495	ENSMUST00000109824
A_52_P358388,A_52_P212887,A_65_P04580,A_66_P127459|232314	2.69389e-15	1.26996e-16	2.11694	1.14667	-1.84617	2.18391	1.13099	-1.93096	Ppp4r2	protein phosphatase 4, regulatory subunit 2	Mus musculus protein phosphatase 4, regulatory subunit 2 (Ppp4r2), mRNA [NM_182939]///protein phosphatase 4, regulatory subunit 2 [Source:MGI Symbol;Acc:MGI:3027896] [ENSMUST00000063854]	232314	NM_182939///XM_006506008	ENSMUST00000178019///ENSMUST00000063854///ENSMUST00000203940
A_55_P2001143|110147	2.69701e-15	1.27251e-16	-1.61896	-1.22391	1.32278	-1.65641	-1.12658	1.47029	Ehmt2	euchromatic histone lysine N-methyltransferase 2	Mus musculus euchromatic histone lysine N-methyltransferase 2 (Ehmt2), transcript variant 1, mRNA [NM_145830]	110147	NM_145830	ENSMUST00000078061
A_66_P100280,A_51_P258465,A_55_P2010699|231807	2.70557e-15	1.27762e-16	1.82513	1.35882	-1.34317	1.84525	1.49007	-1.23836	BC037034	cDNA sequence BC037034	Mus musculus cDNA sequence BC037034 (BC037034), mRNA [NM_153161]	231807	NM_153161	ENSMUST00000162632///ENSMUST00000159534///ENSMUST00000159146
A_55_P2155041,A_52_P557098,A_55_P2730263,A_55_P2714314,A_66_P122717|66970	2.70807e-15	1.27988e-16	-2.29325	-1.30101	1.76267	-2.21612	-1.40917	1.57265	Ssbp2	single-stranded DNA binding protein 2	Mus musculus single-stranded DNA binding protein 2 (Ssbp2), transcript variant 2, mRNA [NM_024272]///single-stranded DNA binding protein 2 [Source:MGI Symbol;Acc:MGI:1914220] [ENSMUST00000144659]///Q4RMP3_TETNG (Q4RMP3) Chromosome 10 SCAF15019, whole genome shotgun sequence, partial (47%) [TC1621258]///single-stranded DNA binding protein 2 [Source:MGI Symbol;Acc:MGI:1914220] [ENSMUST00000137493]	66970	NM_024272	ENSMUST00000042122///ENSMUST00000144659///ENSMUST00000137493
A_52_P536869,A_55_P2737144|18627	2.72427e-15	1.28861e-16	2.58058	1.00645	-2.56405	2.42399	-1.13722	-2.7566	Per2	period circadian clock 2	Mus musculus period circadian clock 2 (Per2), mRNA [NM_011066]	18627	NM_011066	ENSMUST00000069620
A_55_P2731246,A_55_P2017090,A_55_P2082869|14055	2.73381e-15	1.29512e-16	-2.45585	-1.07524	2.284	-2.72869	-1.24144	2.198	Ezh1	enhancer of zeste 1 polycomb repressive complex 2 subunit	enhancer of zeste 1 polycomb repressive complex 2 subunit [Source:MGI Symbol;Acc:MGI:1097695] [ENSMUST00000100417]///Mus musculus enhancer of zeste 1 polycomb repressive complex 2 subunit (Ezh1), mRNA [NM_007970]	14055	NM_007970	ENSMUST00000100417///ENSMUST00000107285
A_51_P456187|18567	2.73381e-15	1.2953e-16	1.94595	1.05621	-1.84238	2.0498	1.19563	-1.71441	Pdcd2	programmed cell death 2	Mus musculus programmed cell death 2 (Pdcd2), mRNA [NM_008799]	18567	NM_008799	ENSMUST00000125709
A_51_P223709,A_55_P2514028|269224	2.78235e-15	1.3194e-16	-3.12447	1.03516	3.23432	-3.3544	-1.13873	2.94573	Pask	PAS domain containing serine/threonine kinase	Mus musculus PAS domain containing serine/threonine kinase (Pask), mRNA [NM_080850]///PREDICTED: Mus musculus PAS domain containing serine/threonine kinase (Pask), transcript variant X5, misc_RNA [XR_001784731]	269224	NM_080850///XR_001784731	ENSMUST00000133886
A_55_P2048493|71004	2.78554e-15	1.32202e-16	-2.20546	-1.80004	1.22523	-1.87221	-1.63847	1.14266	4931440P22Rik	RIKEN cDNA 4931440P22 gene	Mus musculus RIKEN cDNA 4931440P22 gene (4931440P22Rik), long non-coding RNA [NR_027955]	71004	NR_027955	ENSMUST00000099076
A_55_P2931767,A_55_P2096737|232089	2.79687e-15	1.32851e-16	-2.91983	-1.074	2.71864	-2.75908	1.05223	2.90319	Elmod3	ELMO/CED-12 domain containing 3	Mus musculus ELMO/CED-12 domain containing 3 (Elmod3), transcript variant 1, mRNA [NM_144917]	232089	NM_144917	ENSMUST00000152705///ENSMUST00000070990
A_55_P1978122,A_52_P165831,A_65_P12908|70603	2.81435e-15	1.33793e-16	-2.63988	1.03007	2.71926	-2.46353	1.08235	2.66642	Mutyh	mutY DNA glycosylase	Mus musculus mutY DNA glycosylase (Mutyh), transcript variant 1, mRNA [NM_001159581]///Mus musculus mutY DNA glycosylase (Mutyh), transcript variant 2, mRNA [NM_133250]	70603	NM_001159581///NM_133250	ENSMUST00000155346///ENSMUST00000138056
A_51_P478311,A_55_P2634533|97112	2.83509e-15	1.34892e-16	2.30106	1.10163	-2.08878	2.30735	1.15668	-1.9948	Nmd3	NMD3 ribosome export adaptor	Mus musculus NMD3 ribosome export adaptor (Nmd3), mRNA [NM_133787]///NMD3 ribosome export adaptor [Source:MGI Symbol;Acc:MGI:2140103] [ENSMUST00000149680]	97112	NM_133787	ENSMUST00000029358///ENSMUST00000149680
A_51_P448946|58172	2.83758e-15	1.35123e-16	2.00911	1.13428	-1.77126	2.31037	1.14369	-2.0201	Sertad2	SERTA domain containing 2	Mus musculus SERTA domain containing 2 (Sertad2), transcript variant 1, mRNA [NM_021372]	58172	NM_021372	ENSMUST00000109585
A_55_P2009708	2.83878e-15	1.35293e-16	2.48542	1.47082	-1.68982	2.49386	1.51203	-1.64935						ENSMUST00000220592
A_65_P14247|16174	2.84312e-15	1.35612e-16	3.70185	1.43018	-2.58838	3.43525	1.30531	-2.63175	Il18rap	interleukin 18 receptor accessory protein	Mus musculus interleukin 18 receptor accessory protein (Il18rap), mRNA [NM_010553]	16174	NM_010553	ENSMUST00000027237
A_55_P2745072,A_52_P342159|73181	2.8571e-15	1.36393e-16	-7.17137	-1.0692	6.70723	-6.31584	-1.20993	5.22002	Nfatc4	nuclear factor of activated T cells, cytoplasmic, calcineurin dependent 4	Mus musculus nuclear factor of activated T cells, cytoplasmic, calcineurin dependent 4 (Nfatc4), transcript variant 1, mRNA [NM_023699]	73181	NM_023699	ENSMUST00000024179///ENSMUST00000172271
A_55_P2911228,A_51_P513085|109145	2.92104e-15	1.39561e-16	-1.66664	1.05926	1.7654	-1.73789	1.0746	1.86754	Gins4	GINS complex subunit 4 (Sld5 homolog)	Mus musculus GINS complex subunit 4 (Sld5 homolog) (Gins4), mRNA [NM_024240]	109145	NM_024240	ENSMUST00000033950
A_52_P418489,A_55_P2733362|94242	2.92467e-15	1.39851e-16	3.60196	1.39785	-2.57678	4.0472	1.48639	-2.72284	Tinagl1	tubulointerstitial nephritis antigen-like 1	Mus musculus tubulointerstitial nephritis antigen-like 1 (Tinagl1), transcript variant 1, mRNA [NM_023476]///tubulointerstitial nephritis antigen-like 1 [Source:MGI Symbol;Acc:MGI:2137617] [ENSMUST00000030560]	94242	NM_023476	ENSMUST00000105998///ENSMUST00000030560
A_52_P322544|102058	2.94428e-15	1.40905e-16	2.45918	1.10854	-2.2184	2.32828	1.27844	-1.82119	Exoc8	exocyst complex component 8	Mus musculus exocyst complex component 8 (Exoc8), mRNA [NM_198103]	102058	NM_198103	ENSMUST00000098312
A_55_P2110998|100129	2.97182e-15	1.42342e-16	-2.22235	-1.03944	2.13803	-2.45255	-1.21021	2.02655	Gpr153	G protein-coupled receptor 153	Mus musculus G protein-coupled receptor 153 (Gpr153), mRNA [NM_178406]	100129	NM_178406	ENSMUST00000105650
A_52_P88983,A_51_P223025,A_55_P2732181|68813	2.98553e-15	1.43116e-16	2.43733	1.22296	-1.99297	2.46559	1.16841	-2.11021	Dock5	dedicator of cytokinesis 5	Mus musculus dedicator of cytokinesis 5 (Dock5), mRNA [NM_177780]///DOCK1_HUMAN (Q14185) Dedicator of cytokinesis protein 1 (180 kDa protein downstream of CRK) (DOCK180), partial (29%) [TC1590694]	68813	NM_177780	ENSMUST00000039135
A_52_P287058,A_55_P2093563,A_55_P1994025|67890	2.98568e-15	1.43243e-16	1.53963	-1.10346	-1.69893	1.56011	1.0033	-1.55498	Ufm1	ubiquitin-fold modifier 1	Mus musculus ubiquitin-fold modifier 1 (Ufm1), mRNA [NM_026435]	67890	NM_026435	ENSMUST00000029309///ENSMUST00000148338///ENSMUST00000146598
A_55_P1964628|102633627	3.03387e-15	1.45675e-16	1.55762	-1.13133	-1.76218	1.65101	-1.08467	-1.79081	LOC102633627	tropomyosin alpha-4 chain pseudogene	PREDICTED: Mus musculus tropomyosin alpha-4 chain pseudogene (LOC102633627), misc_RNA [XR_385459]	102633627	XR_385459
A_55_P2802957|54208	3.04378e-15	1.46393e-16	-1.64025	-1.256	1.30593	-1.87697	-1.32473	1.41688	Arl6ip1	ADP-ribosylation factor-like 6 interacting protein 1	Mus musculus ADP-ribosylation factor-like 6 interacting protein 1 (Arl6ip1), mRNA [NM_019419]	54208	NM_019419	ENSMUST00000203154
A_55_P2733857	3.04378e-15	1.46334e-16	-6.49399	-1.50617	4.31159	-8.95163	-1.64813	5.4314
A_52_P533304|217869	3.06505e-15	1.47537e-16	2.61752	1.43242	-1.82734	2.79532	1.43031	-1.95435	Eif5	eukaryotic translation initiation factor 5	Mus musculus eukaryotic translation initiation factor 5 (Eif5), transcript variant 1, mRNA [NM_173363]	217869	NM_173363	ENSMUST00000222441
A_55_P2904646,A_51_P430071|319190	3.08988e-15	1.48855e-16	-2.45546	1.08199	2.65678	-2.84939	-1.09374	2.60518	Hist2h2be	histone cluster 2, H2be	Mus musculus histone cluster 2, H2be (Hist2h2be), mRNA [NM_178214]	319190	NM_178214	ENSMUST00000090781
A_52_P614517,A_55_P2862472,A_51_P146802|69288	3.1116e-15	1.50025e-16	-1.7891	-1.21924	1.46739	-1.82333	-1.29871	1.40395	Rhobtb1	Rho-related BTB domain containing 1	Mus musculus Rho-related BTB domain containing 1 (Rhobtb1), transcript variant 4, mRNA [NM_001252638]	69288	NM_001252638	ENSMUST00000067908///ENSMUST00000168117///ENSMUST00000164034
A_55_P1976204,A_51_P363947,A_55_P1986282|12575	3.15048e-15	1.52025e-16	2.66267	1.12014	-2.37708	2.85846	1.23835	-2.30828	Cdkn1a	cyclin-dependent kinase inhibitor 1A (P21)	cyclin-dependent kinase inhibitor 1A (P21) [Source:MGI Symbol;Acc:MGI:104556] [ENSMUST00000122348]///Mus musculus cyclin-dependent kinase inhibitor 1A (P21) (Cdkn1a), transcript variant 1, mRNA [NM_007669]///Mus musculus cyclin-dependent kinase inhibitor 1A (P21) (Cdkn1a), transcript variant 2, mRNA [NM_001111099]	12575	NM_007669///NM_001111099	ENSMUST00000122348///ENSMUST00000023829///ENSMUST00000119901
A_51_P148105,A_55_P2721563,A_55_P2008126|19361	3.16517e-15	1.52859e-16	-2.2077	1.02114	2.25436	-2.26172	1.03747	2.34647	Rad51	RAD51 recombinase	Mus musculus RAD51 recombinase (Rad51), mRNA [NM_011234]///RAD51 recombinase [Source:MGI Symbol;Acc:MGI:97890] [ENSMUST00000141389]///RAD51 recombinase [Source:MGI Symbol;Acc:MGI:97890] [ENSMUST00000110828]	19361	NM_011234	ENSMUST00000152327///ENSMUST00000141389///ENSMUST00000110828
A_30_P01025368	3.18122e-15	1.53761e-16	1.6998	-1.02009	-1.73395	1.61613	-1.01476	-1.63999			lincRNA:chr4:116791819-116798263 reverse strand
A_55_P2796598,A_51_P295816,A_55_P1979246|70799	3.18357e-15	1.54001e-16	-1.99203	1.09199	2.17528	-2.15085	-1.0636	2.02224	Cep192	centrosomal protein 192	Mus musculus centrosomal protein 192 (Cep192), mRNA [NM_027556]///Q7TP06_RAT (Q7TP06) Da1-6, partial (6%) [TC1705951]	70799	NM_027556	ENSMUST00000025425
A_51_P476538|100043272	3.20234e-15	1.55036e-16	2.66885	1.4949	-1.7853	2.82187	1.46364	-1.92799	Inafm2	InaF motif containing 2	Mus musculus InaF motif containing 2 (Inafm2), mRNA [NM_001301269]	100043272	NM_001301269	ENSMUST00000149978
A_55_P2077458,A_55_P2093595,A_55_P2167984|67468	3.20292e-15	1.55191e-16	2.69329	1.20213	-2.24043	2.51167	1.15347	-2.17748	Mmd	monocyte to macrophage differentiation-associated	monocyte to macrophage differentiation-associated [Source:MGI Symbol;Acc:MGI:1914718] [ENSMUST00000107887]///Mus musculus monocyte to macrophage differentiation-associated (Mmd), mRNA [NM_026178]///monocyte to macrophage differentiation-associated [Source:MGI Symbol;Acc:MGI:1914718] [ENSMUST00000004050]	67468	NM_026178	ENSMUST00000107887///ENSMUST00000004050
A_51_P315682,A_55_P2170737|319765	3.20839e-15	1.55584e-16	1.77776	1.17831	-1.50874	2.00742	1.2366	-1.62334	Igf2bp2	insulin-like growth factor 2 mRNA binding protein 2	Mus musculus insulin-like growth factor 2 mRNA binding protein 2 (Igf2bp2), mRNA [NM_183029]	319765	NM_183029	ENSMUST00000134188///ENSMUST00000115379
A_55_P2808656,A_51_P220813|14702	3.2183e-15	1.56192e-16	-1.6456	1.13546	1.86851	-1.70181	1.04097	1.77154	Gng2	guanine nucleotide binding protein (G protein), gamma 2	Mus musculus guanine nucleotide binding protein (G protein), gamma 2 (Gng2), transcript variant 1, mRNA [NM_010315]	14702	NM_010315	ENSMUST00000160013///ENSMUST00000161247
A_30_P01020168	3.23004e-15	1.56983e-16	-14.6215	-10.7997	1.35388	-16.4647	-9.31955	1.76669			lincRNA:chr14:70483555-70484159 forward strand
A_55_P2068066|268480	3.23004e-15	1.57019e-16	-2.84403	-1.11973	2.53992	-3.24537	-1.11766	2.90372	Rapgefl1	Rap guanine nucleotide exchange factor (GEF)-like 1	Mus musculus Rap guanine nucleotide exchange factor (GEF)-like 1 (Rapgefl1), mRNA [NM_001080925]	268480	NM_001080925	ENSMUST00000139889
A_55_P2505920,A_55_P2745682|18113	3.24201e-15	1.57729e-16	-2.97326	-1.59235	1.86722	-2.82254	-1.84804	1.52731	Nnmt	nicotinamide N-methyltransferase	Mus musculus nicotinamide N-methyltransferase (Nnmt), transcript variant 1, mRNA [NM_010924]///Mus musculus nicotinamide N-methyltransferase (Nnmt), transcript variant 2, mRNA [NM_001311062]	18113	NM_010924///NM_001311062	ENSMUST00000126109///ENSMUST00000128076
A_52_P1197913|17873	3.25122e-15	1.58306e-16	1.16988	-1.71732	-2.00905	1.05712	-2.02849	-2.14436	Gadd45b	growth arrest and DNA-damage-inducible 45 beta	Mus musculus growth arrest and DNA-damage-inducible 45 beta (Gadd45b), mRNA [NM_008655]	17873	NM_008655	ENSMUST00000219449
A_55_P2810334,A_52_P672399|69090	3.27237e-15	1.59466e-16	-2.13044	-1.32643	1.60615	-2.0368	-1.28975	1.57922	Ascc1	activating signal cointegrator 1 complex subunit 1	Mus musculus activating signal cointegrator 1 complex subunit 1 (Ascc1), transcript variant 2, mRNA [NM_026937]	69090	NM_026937	ENSMUST00000050516///ENSMUST00000219778
A_65_P16561,A_51_P324228,A_55_P2719324|20230	3.30495e-15	1.61185e-16	-2.62625	-1.19888	2.19059	-2.62818	-1.36852	1.92045	Satb1	special AT-rich sequence binding protein 1	Mus musculus special AT-rich sequence binding protein 1 (Satb1), transcript variant 1, mRNA [NM_001163630]///Mus musculus special AT-rich sequence binding protein 1 (Satb1), transcript variant 2, mRNA [NM_009122]///special AT-rich sequence binding protein 1 [Source:MGI Symbol;Acc:MGI:105084] [ENSMUST00000146414]	20230	NM_001163630///NM_009122	ENSMUST00000133574///ENSMUST00000140979///ENSMUST00000146414
A_55_P2508293|100736249	3.31333e-15	1.61725e-16	-2.0091	-1.05964	1.89602	-2.18035	1.07815	2.35073	Mira	mistral long non-coding RNA	Mus musculus mistral long non-coding RNA (Mira), long non-coding RNA [NR_045199]	100736249	NR_045199	ENSMUST00000153280
[truncated: 18,424 more rows]

## Sheet: Table S3
Table S3
[truncated: 2,118 more rows]

## Sheet: Table S4
Table S4
[truncated: 317 more rows]

## Sheet: Table S5
Table S5
[truncated: 61 more rows]

## Sheet: Table S6
Table S6
[truncated: 59 more rows]

## Sheet: Table S7
Table S7
[truncated: 43 more rows]

## Sheet: Table S8
Table S8
[truncated: 26 more rows]

## Sheet: Table S9
Table S9
[truncated: 28 more rows]

## Sheet: Table S10
Table S10
[truncated: 17 more rows]

[truncated: 3 more sheets: Table S11, Table S12, Table S13]
